# Supplementary material for: Tandem C- and O-alkylative annulation of β-ketosulfones with 1,2-bisbromomethyl arenes: one-pot construction of sulfonyl indanes and dioxadibenzofused macrocycles
Source: Royal Society of Chemistry journal article supplement (doi:10.1039/d2ob02199d), 2023-01-01
Supplement: d2ob02199d1.pdf [file d2ob02199d1.pdf]

# Supporting Information

## Tandem C- and O-Alkylative Annulation of $\beta$ -Ketosulfones with 1,2-Bisbromomethyl Arenes. One-pot Construction of Sulfonyl Indanes Dioxadibenzofused Macrocycles

Nai-Chen Hsueh,<sup>a</sup> Kuan-Ting Chen<sup>a</sup> and Meng-Yang Chang<sup>\*a,b,c</sup>

<sup>a</sup>*Department of Medicinal and Applied Chemistry, Kaohsiung Medical University, Kaohsiung 807, Taiwan*

<sup>b</sup>*Department of Medical Research, Kaohsiung Medical University Hospital, Kaohsiung 807, Taiwan*

<sup>c</sup>*NPUST College of Professional Studies, National Pingtung University of Science and Technology,*

*Pingtung 912, Taiwan*

\*Corresponding author, email: [mychang@kmu.edu.tw](mailto:mychang@kmu.edu.tw)

### Table of Contents

|    |                                                                                              |             |
|----|----------------------------------------------------------------------------------------------|-------------|
| 1. | <sup>1</sup> H NMR and <sup>13</sup> C NMR spectra copies of <b>7a-7ad</b>                   | S-2~S-61    |
| 2. | <sup>1</sup> H NMR and <sup>13</sup> C NMR spectra copies of <b>8a-8aa, 8m-1, 8ab-1, 8ad</b> | S-62~S-121  |
| 3. | <sup>1</sup> H NMR and <sup>13</sup> C NMR spectra copies of <b>12-15</b>                    | S-122~S-129 |
| 4. | X-ray crystal data of <b>7a, 8a, 8c, 8m, 8m-1, 8x-1, 8ab-1, 13, 14</b> and <b>15</b>         | S-130~S-149 |

# Compound 7a (<sup>1</sup>H-NMR spectral data)

KT0421

Pulse Sequence: s2pu1  
UNITYplus-400 "unity400"  
Date: Apr 21 2020  
Solvent: CDC13  
Ambient temperature  
Total 32 repetitions

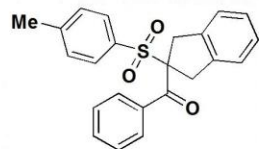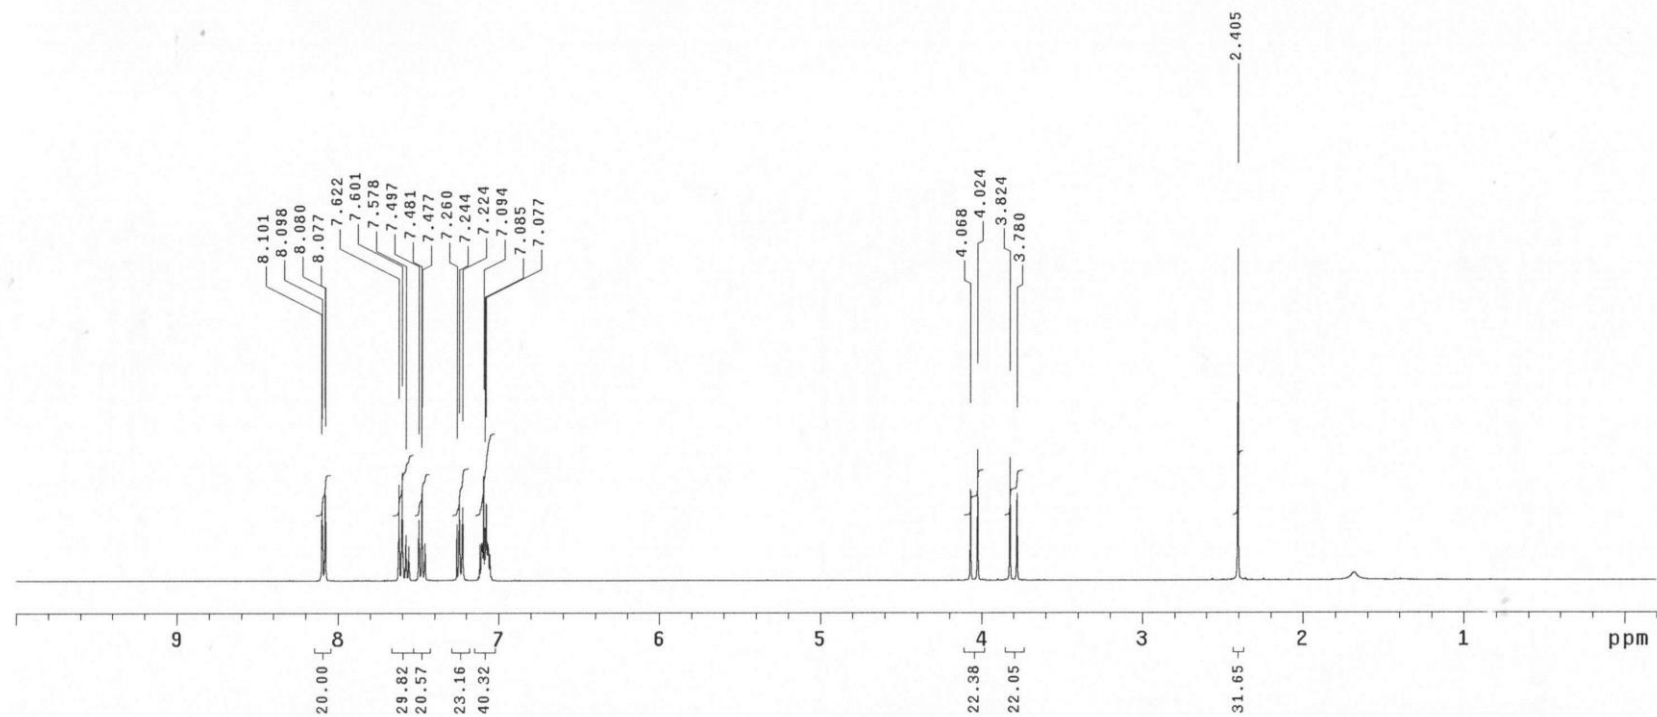

# Compound 7a (<sup>13</sup>C-NMR spectral data)

KT0421

Pulse Sequence: s2pu1  
UNITYplus-400 "unity400"  
Date: Apr 21 2020  
Solvent: CDC13  
Ambient temperature  
Total 2624 repetitions

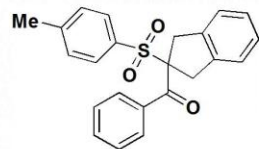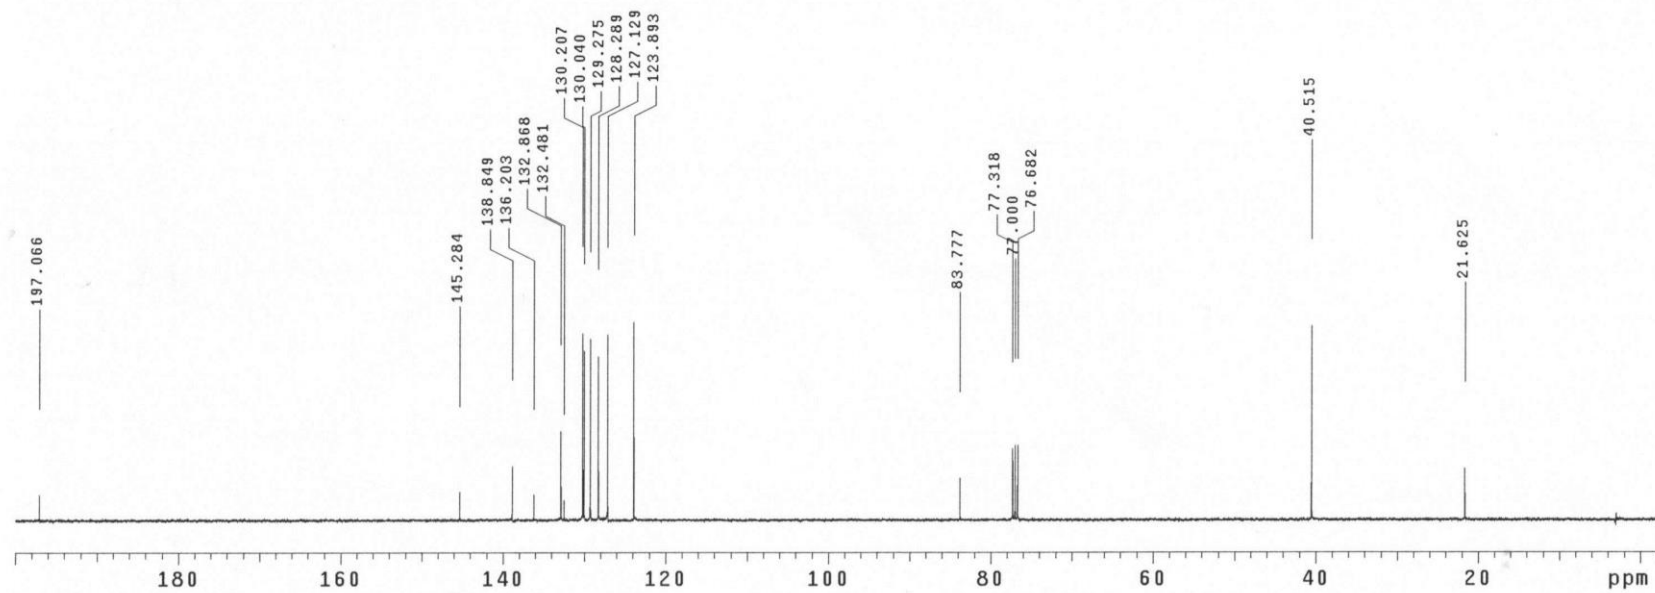

# Compound 7b (<sup>1</sup>H-NMR spectral data)

NC0624-5

Pulse Sequence: s2pu1

Solvent: CDCl<sub>3</sub>

Ambient temperature

UNITYplus-400 "unity400"

Pulse 38.8 degrees

Acq. time 3.744 sec

Width 6000.6 Hz

32 repetitions

OBSERVE H1, 400.2743810 MHz

DATA PROCESSING

FT size 65536

Total time 2 min, 0 sec

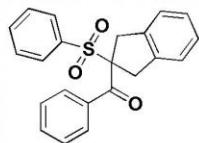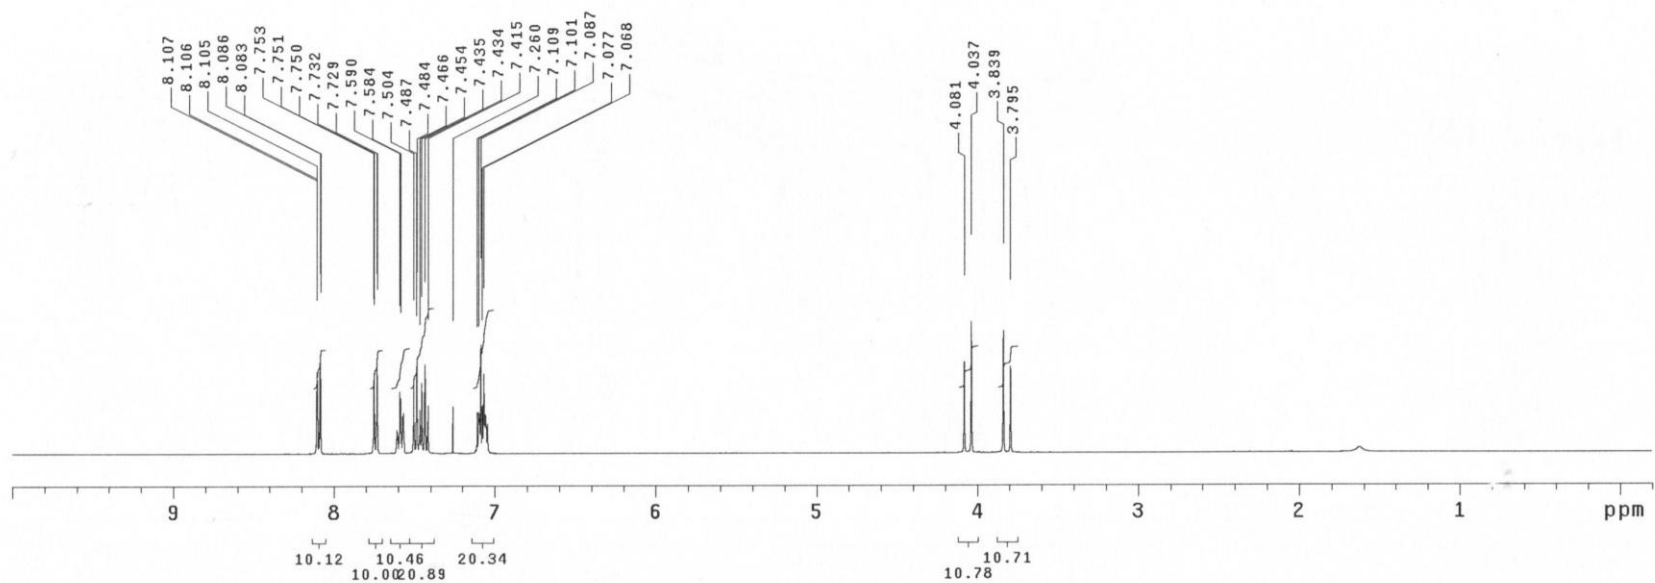

# Compound 7b (<sup>13</sup>C-NMR spectral data)

NC0624-5

Pulse Sequence: s2pu1  
Solvent: CDCl3  
Ambient temperature  
UNITYplus-400 "unity400"

Relax. delay 0.500 sec  
Pulse 65.8 degrees  
Acq. time 1.000 sec  
Width 25000.0 Hz  
512 repetitions  
OBSERVE C13, 100.6490769 MHz  
DECOUPLE H1, 400.2763980 MHz  
Power 43 dB  
on during acquisition  
off during delay  
WALTZ-16 modulated  
DATA PROCESSING  
Line broadening 1.0 Hz  
FT size 65536  
Total time 6 hr, 42 min, 53 sec

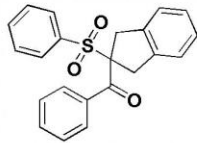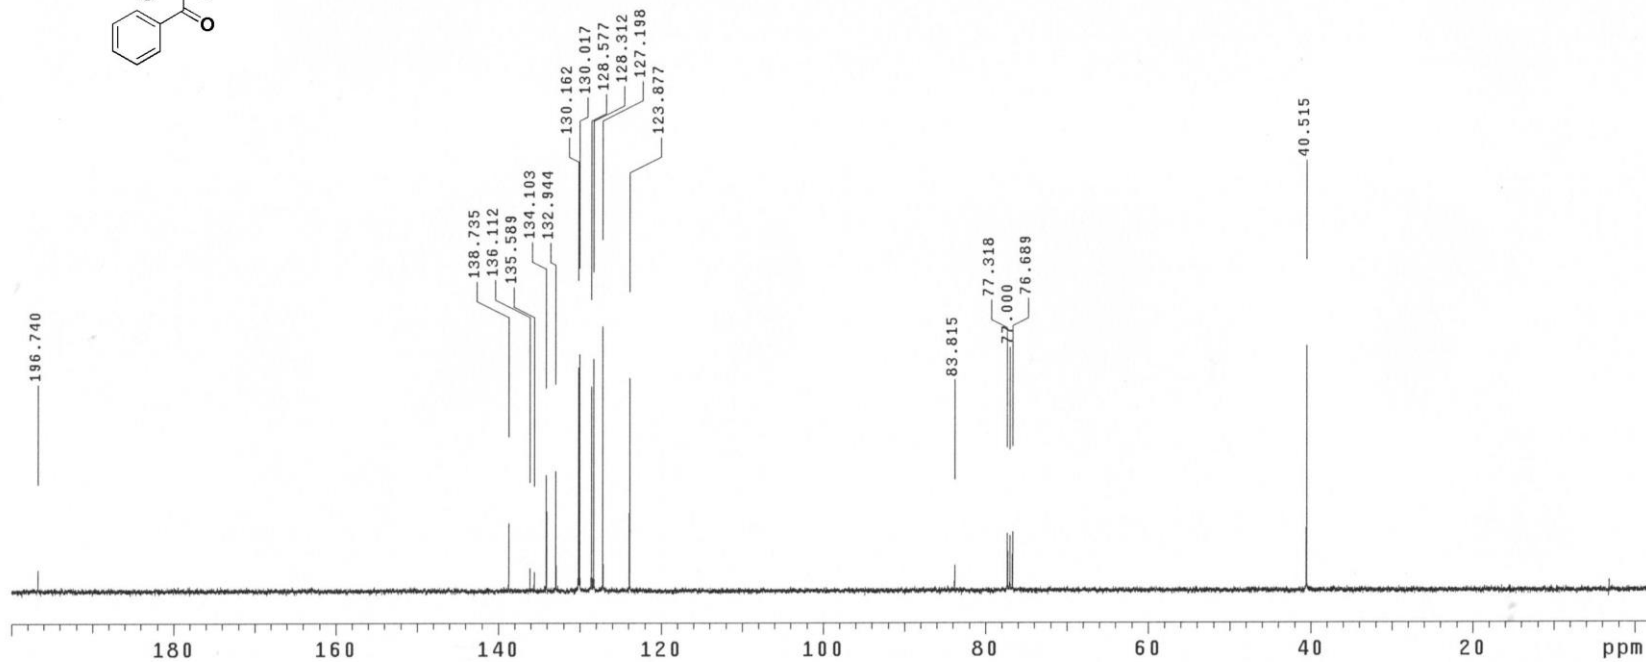

# Compound 7c (<sup>1</sup>H-NMR spectral data)

NC0629-5

Pulse Sequence: s2pu1

Solvent: CDCl<sub>3</sub>

Ambient temperature

UNITYplus-400 "unity400"

Pulse 38.8 degrees

Acq. time 3.744 sec

Width 6000.6 Hz

32 repetitions

OBSERVE H1 400.2743814 MHz

DATA PROCESSING

FT size 65536

Total time 2 min, 0 sec

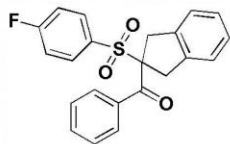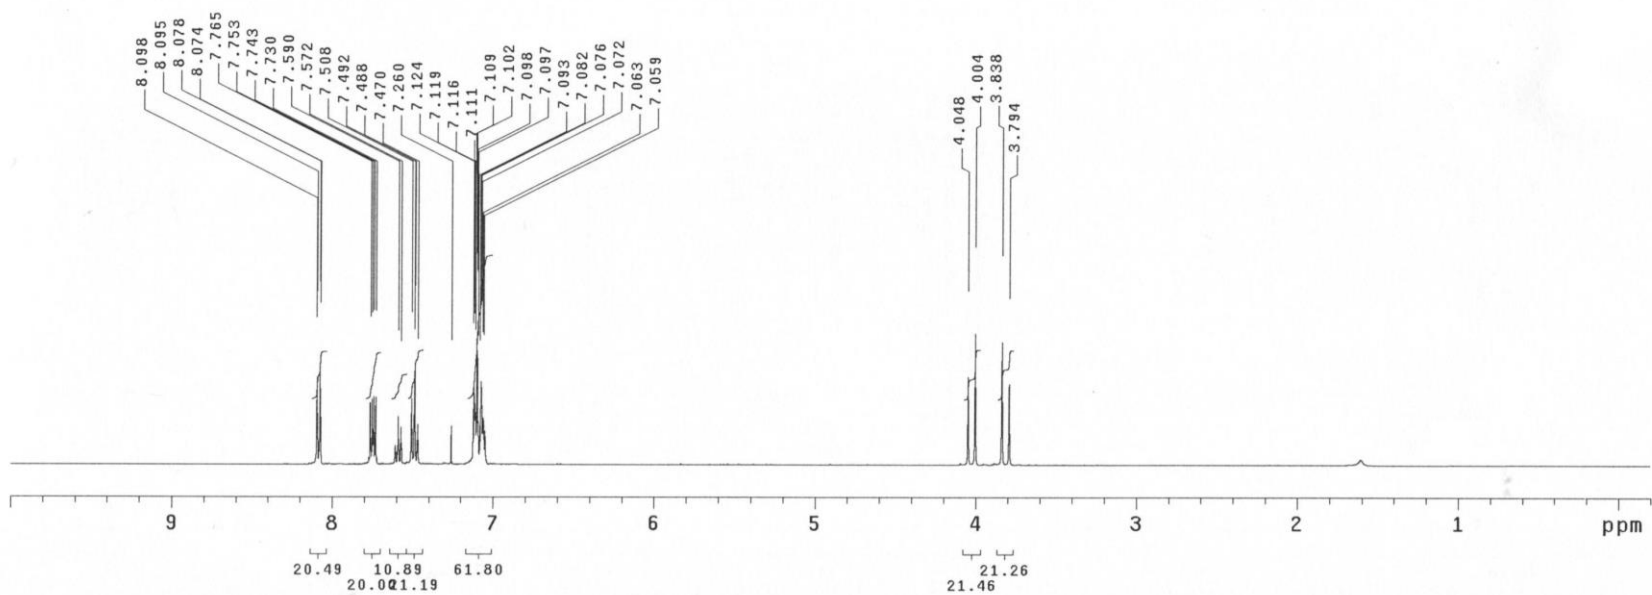

# Compound 7c (<sup>13</sup>C-NMR spectral data)

NC0629-5

Pulse Sequence: s2pu1

Solvent: CDCl<sub>3</sub>

Ambient temperature

UNITYplus-400 "unity400"

Relax. delay 0.500 sec

Pulse 65.8 degrees

Acq. time 1.000 sec

Width 25000.0 Hz

1568 repetitions

OBSERVE C13, 100.6490769 MHz

DECOUPLE H1, 400.2763980 MHz

Power 43 dB

on during acquisition

off during delay

WALTZ-16 modulated

DATA PROCESSING

Line broadening 1.0 Hz

FT size 65536

Total time 13 hr, 25 min, 47 sec

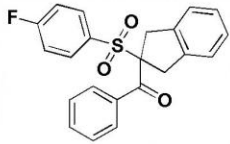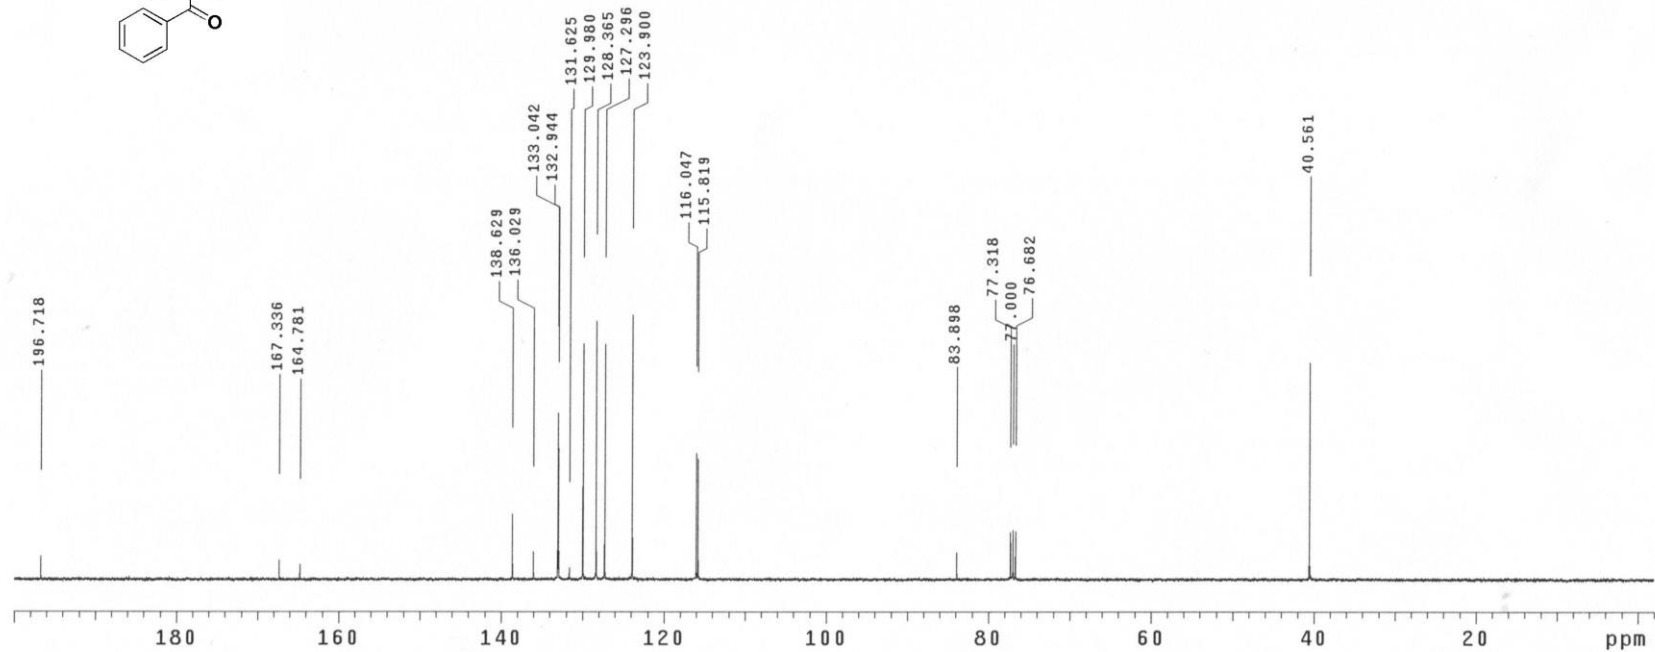

# Compound 7d (<sup>1</sup>H-NMR spectral data)

NC0721-5

Pulse Sequence: s2pu1

UNITYplus-400 "unity400"

Date: Jul 22 2020

Solvent: CDCl<sub>3</sub>

Ambient temperature

Total 32 repetitions

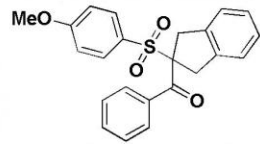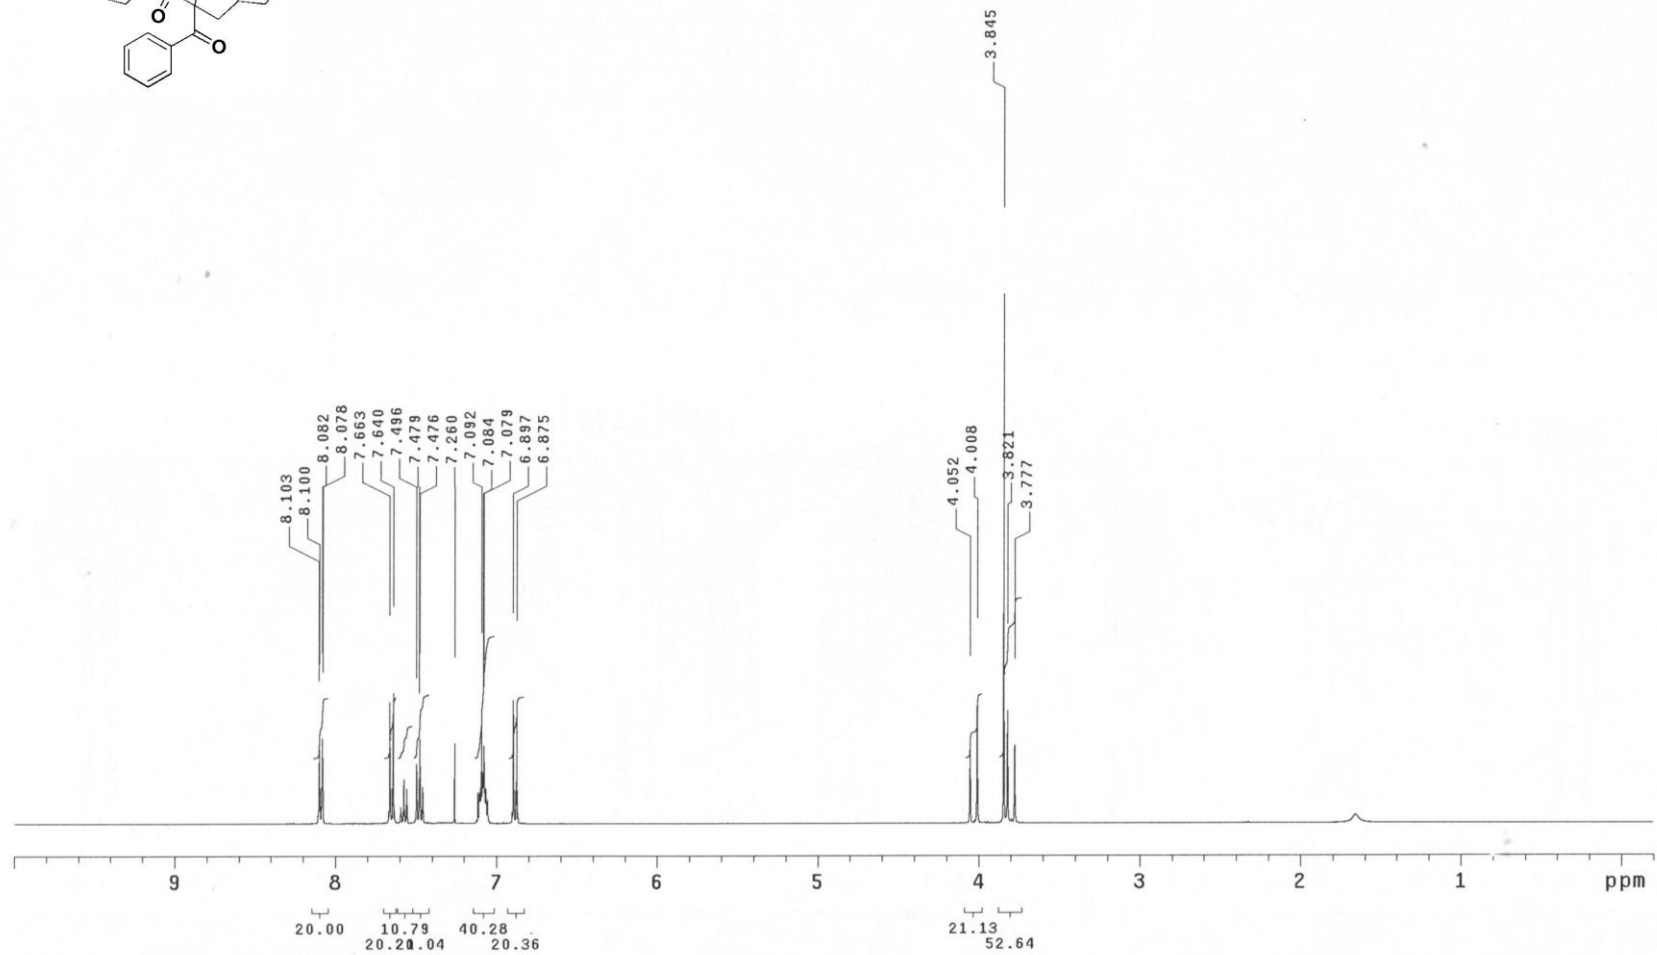



# Compound 7d (<sup>13</sup>C-NMR spectral data)

NC0721-5

Pulse Sequence: s2pu1

UNITYplus-400 "unity400"

Date: Jul 22 2020

Solvent: CDCl<sub>3</sub>

Ambient temperature

Total 1008 repetitions

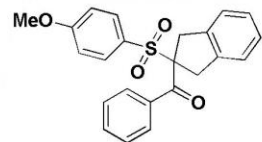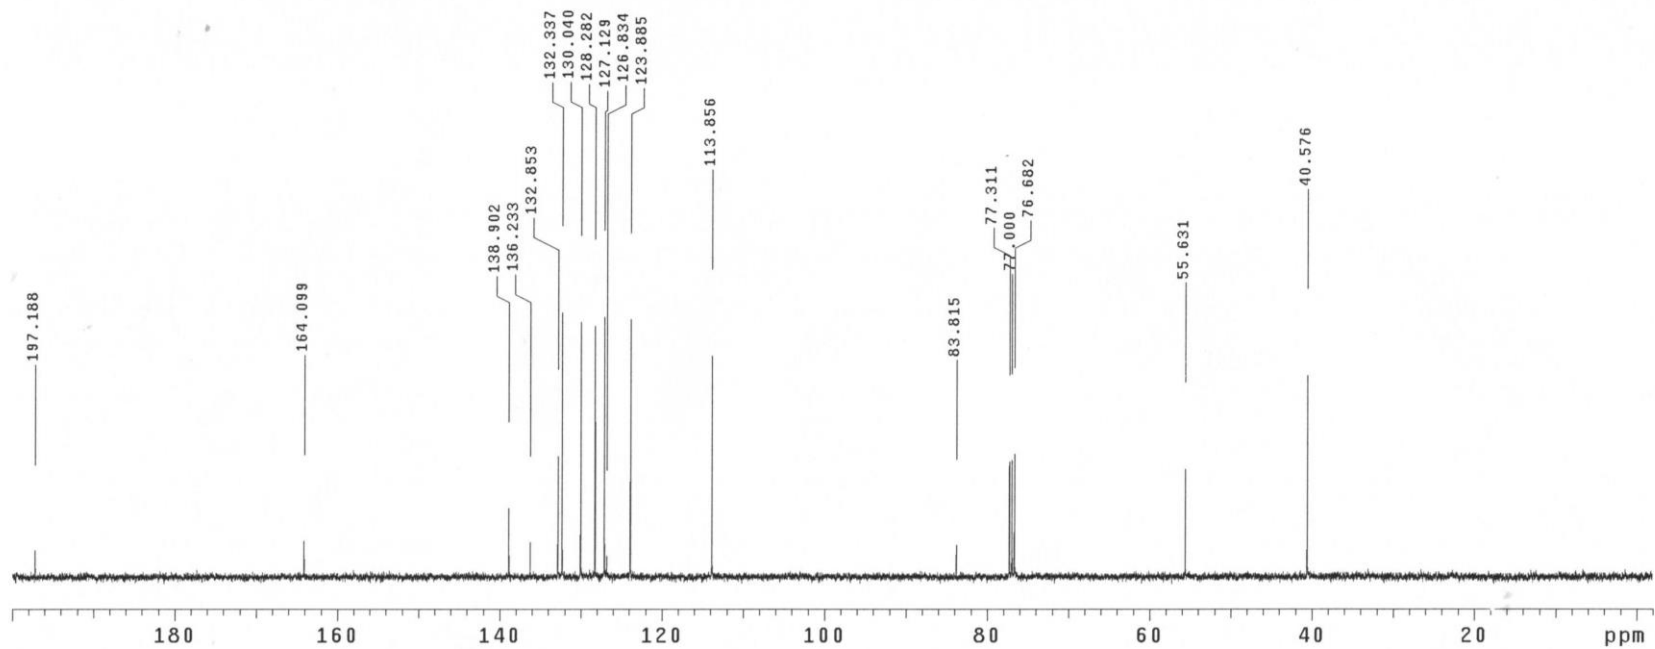

# Compound 7e (<sup>1</sup>H-NMR spectral data)

NC0709-5

Pulse Sequence: s2pu1  
UNITYplus-400 "unity400"  
Date: Jul 15 2020  
Solvent: CDCl<sub>3</sub>  
Ambient temperature  
Total 32 repetitions

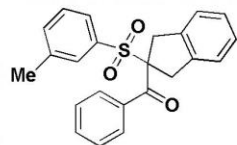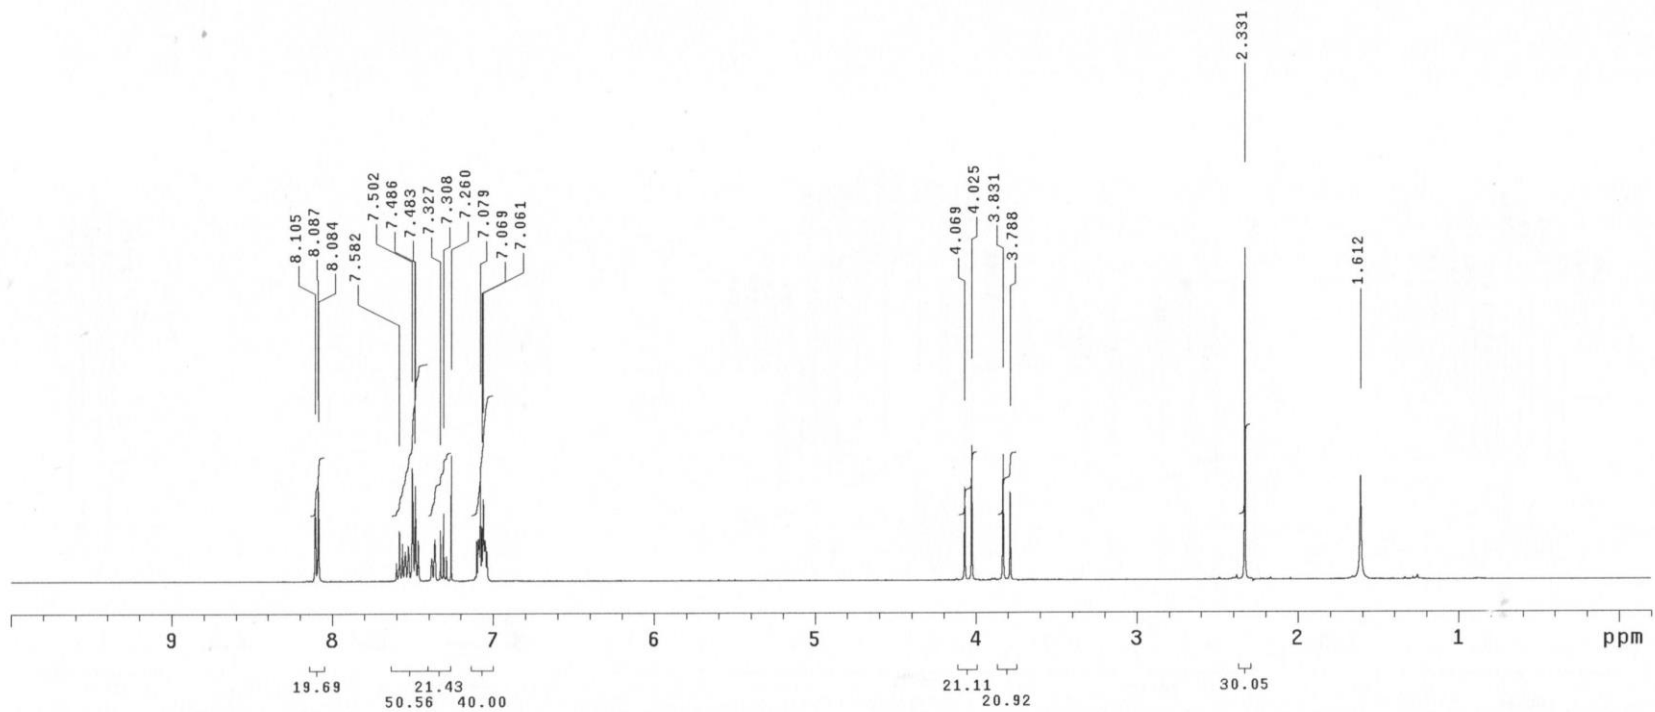

# Compound 7e (<sup>13</sup>C-NMR spectral data)

NC0709-5

Pulse Sequence: s2pu1

UNITYplus-400 "unity400"

Date: Jul 15 2020

Solvent: CDCl<sub>3</sub>

Ambient temperature

Total 3008 repetitions

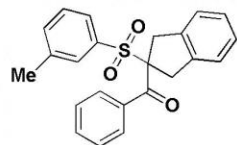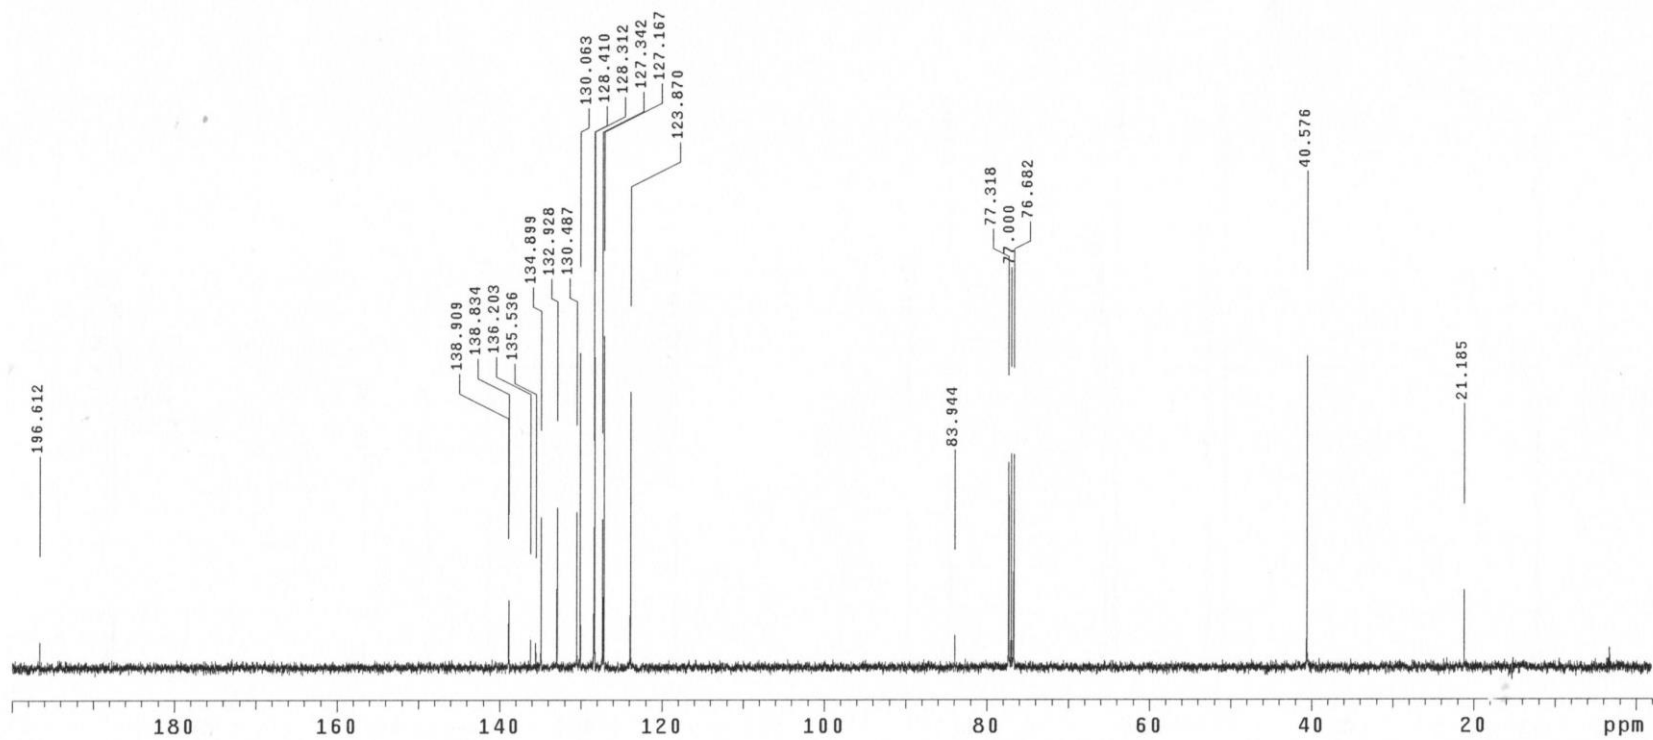

# Compound 7f (<sup>1</sup>H-NMR spectral data)

NC0702-5

Pulse Sequence: s2pu1

Solvent: CDC13

Ambient temperature

UNITYplus-400 "unity400"

Pulse 38.8 degrees

Acq. time 3.744 sec

Width 6000.6 Hz

32 repetitions

OBSERVE H1, 400.2743810 MHz

DATA PROCESSING

FT size 65536

Total time 2 min, 0 sec

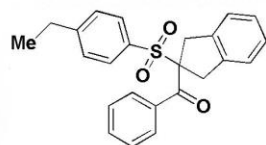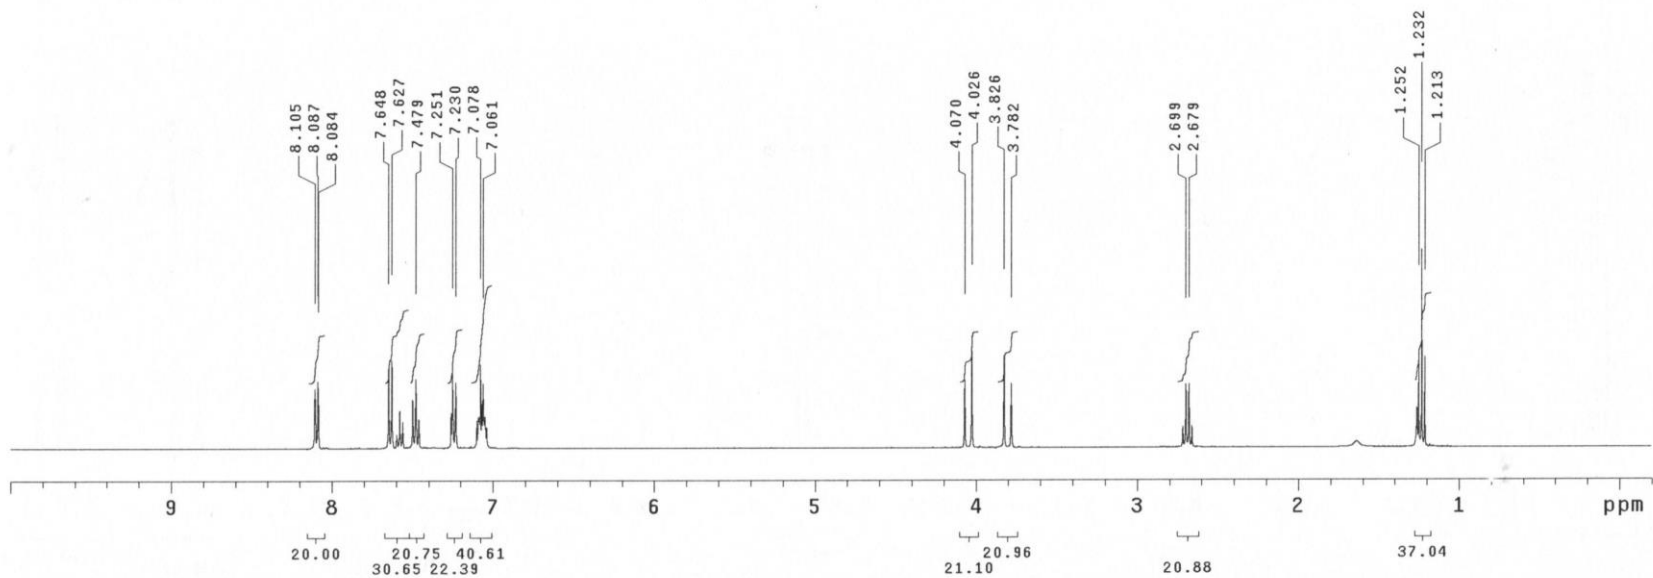

# Compound 7f (<sup>13</sup>C-NMR spectral data)

NC0702-5

Pulse Sequence: s2pu1

Solvent: CDCl<sub>3</sub>

Ambient temperature

UNITYplus-400 "unity400"

Relax. delay 0.500 sec

Pulse 65.8 degrees

Acq. time 0.800 sec

Width 25000.0 Hz

1600 repetitions

OBSERVE C13, 100.6490776 MHz

DECOUPLE H1, 400.2763980 MHz

Power 43 dB

on during acquisition

off during delay

WALTZ-16 modulated

DATA PROCESSING

Line broadening 1.0 Hz

FT size 65536

Total time 11 hr, 39 min, 7 sec

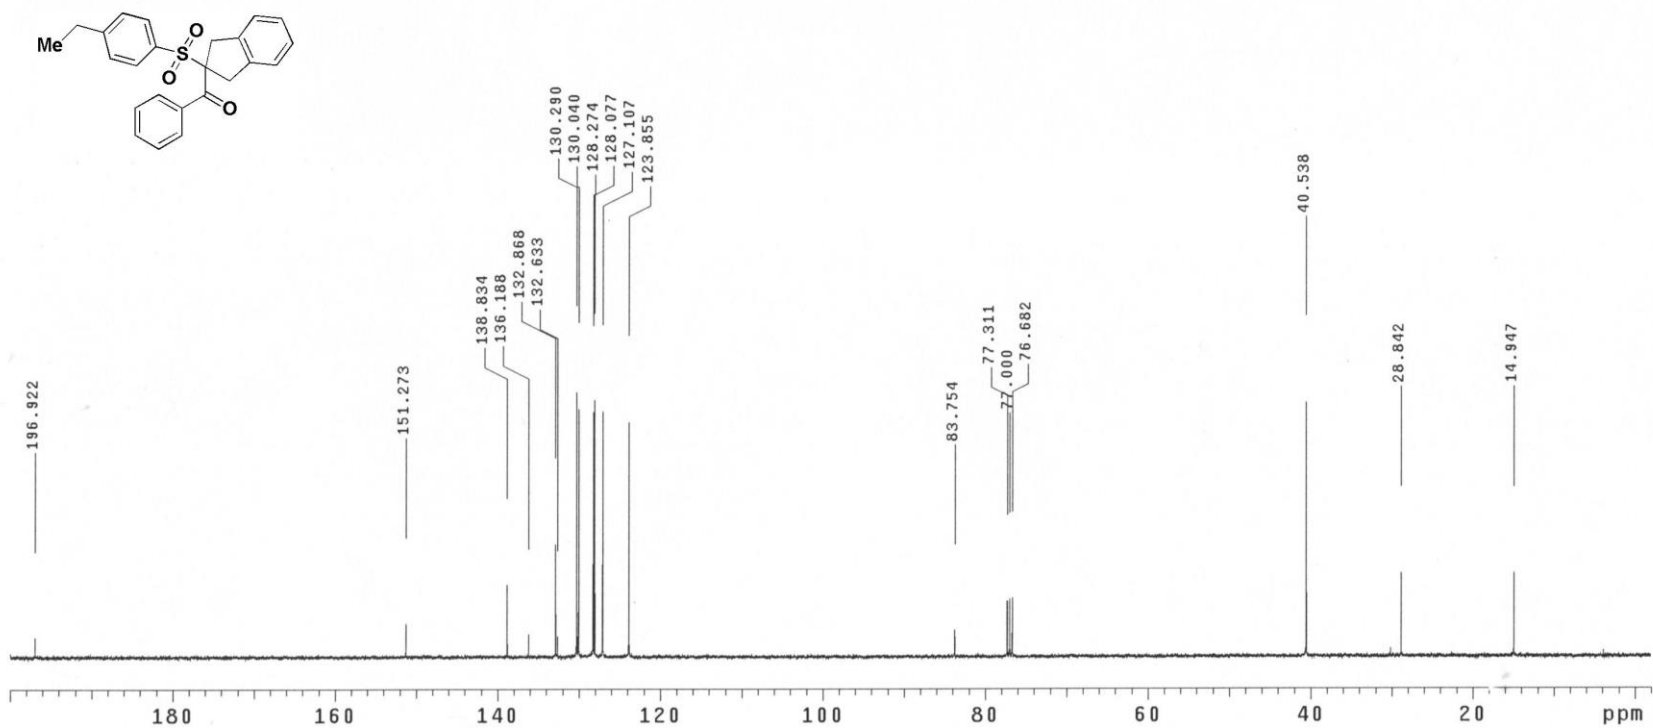

# Compound 7g (<sup>1</sup>H-NMR spectral data)

NC0722-5

Pulse Sequence: s2pu1

UNITYplus-400 "unity400"

Date: Jul 23 2020

Solvent: CDCl<sub>3</sub>

Ambient temperature

Total 32 repetitions

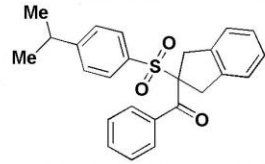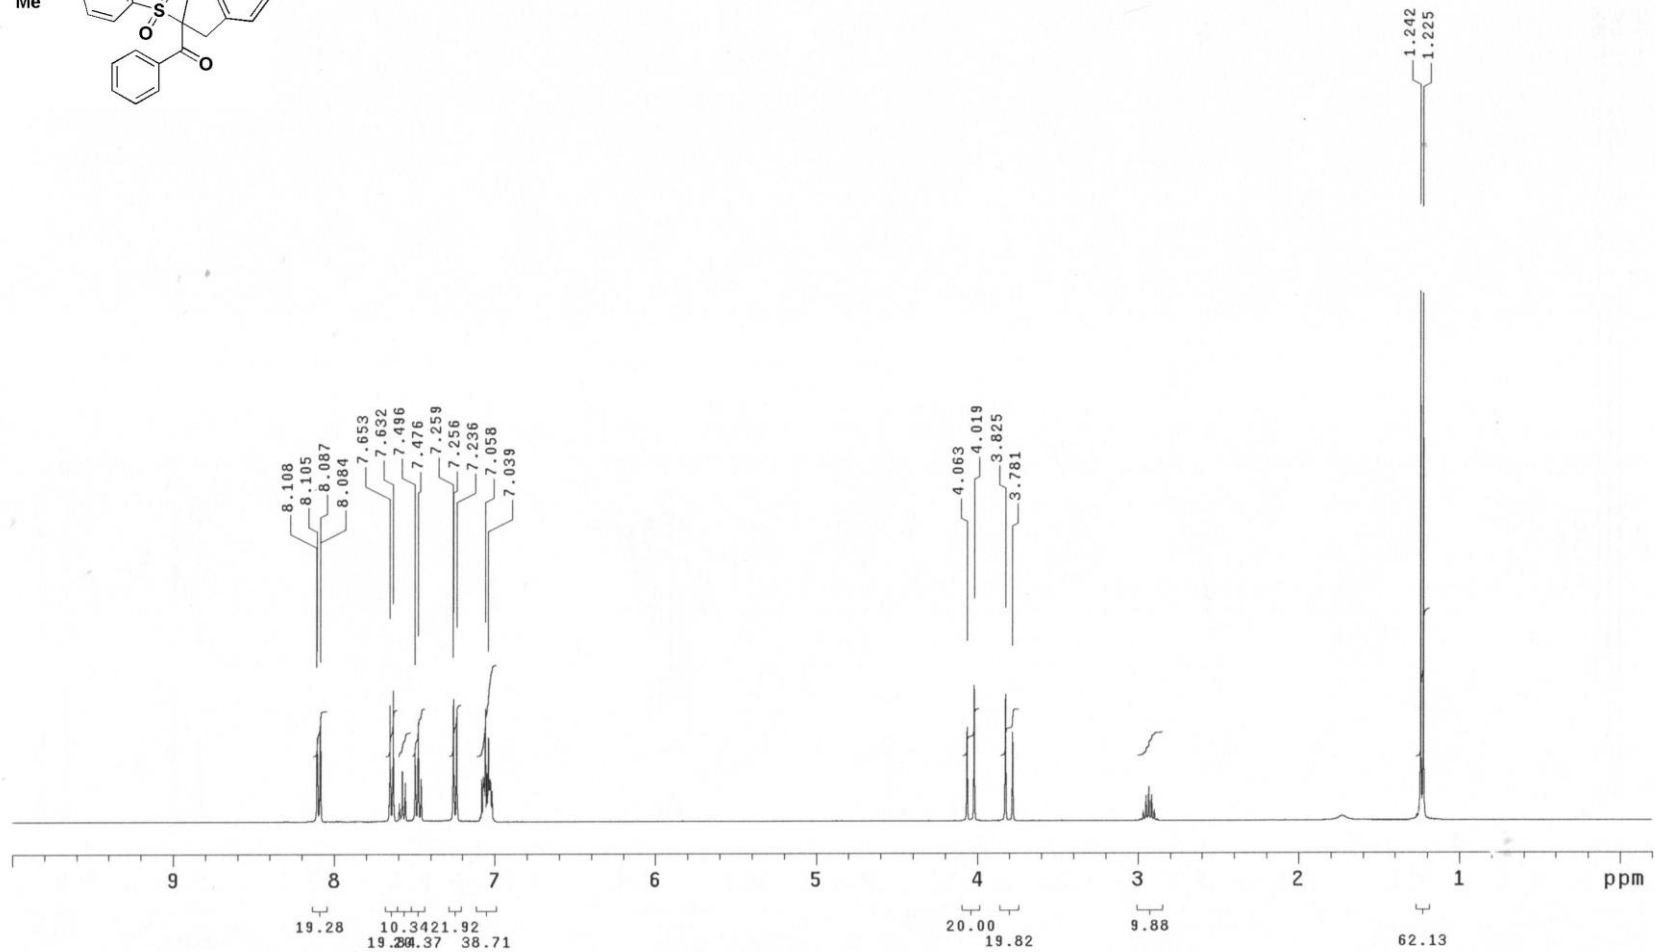

# Compound 7g (<sup>13</sup>C-NMR spectral data)

NC0722-5

Pulse Sequence: s2pu1

UNITYplus-400 "unity400"

Date: Jul 23 2020

Solvent: CDCl<sub>3</sub>

Ambient temperature

Total 640 repetitions

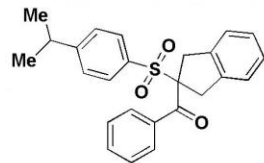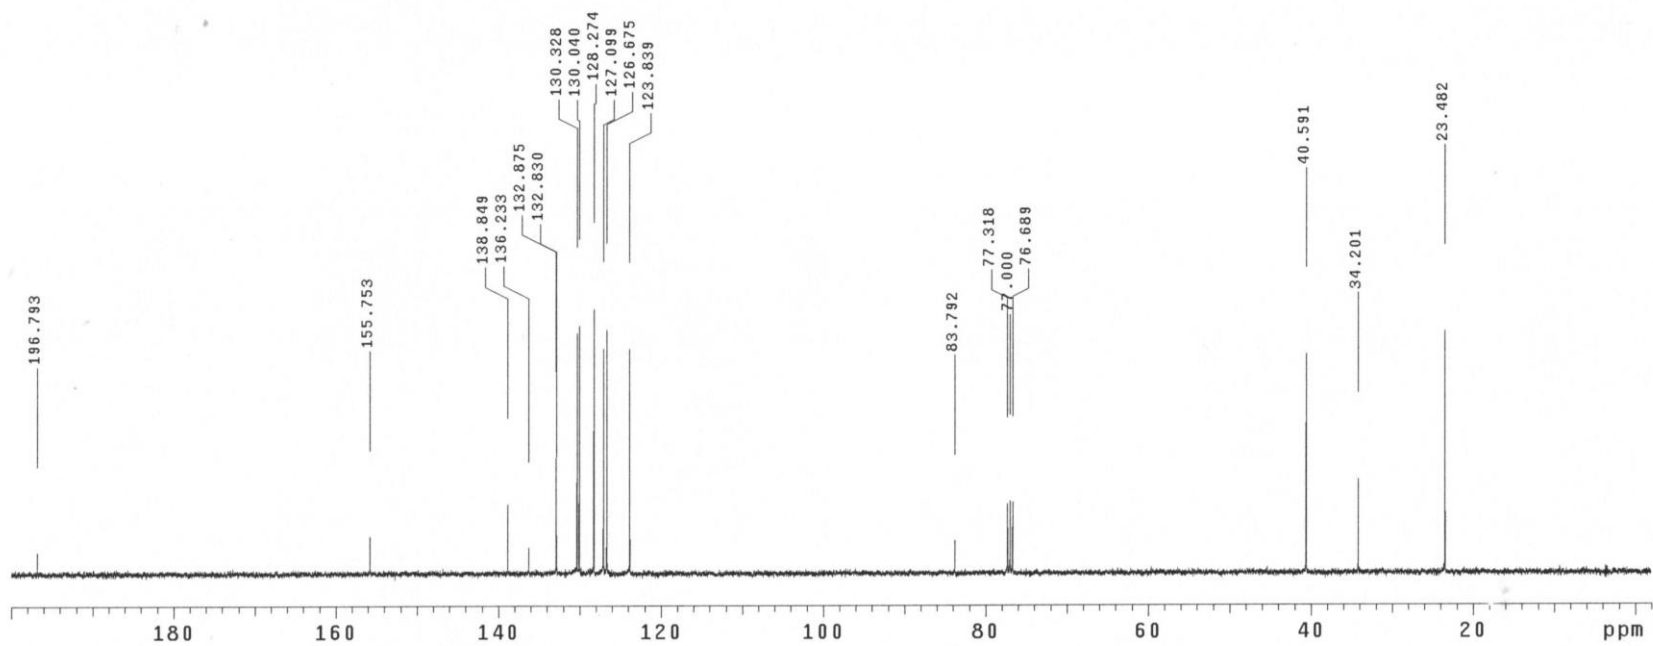

# Compound 7h (<sup>1</sup>H-NMR spectral data)

NC0701-5

Pulse Sequence: s2pu1

Solvent: CDCl<sub>3</sub>

Ambient temperature

UNITYplus-400 "unity400"

Pulse 38.8 degrees

Acq. time 3.744 sec

Width 6000.6 Hz

32 repetitions

OBSERVE H1, 400.2743810 MHz

DATA PROCESSING

FT size 65536

Total time 2 min, 0 sec

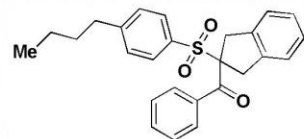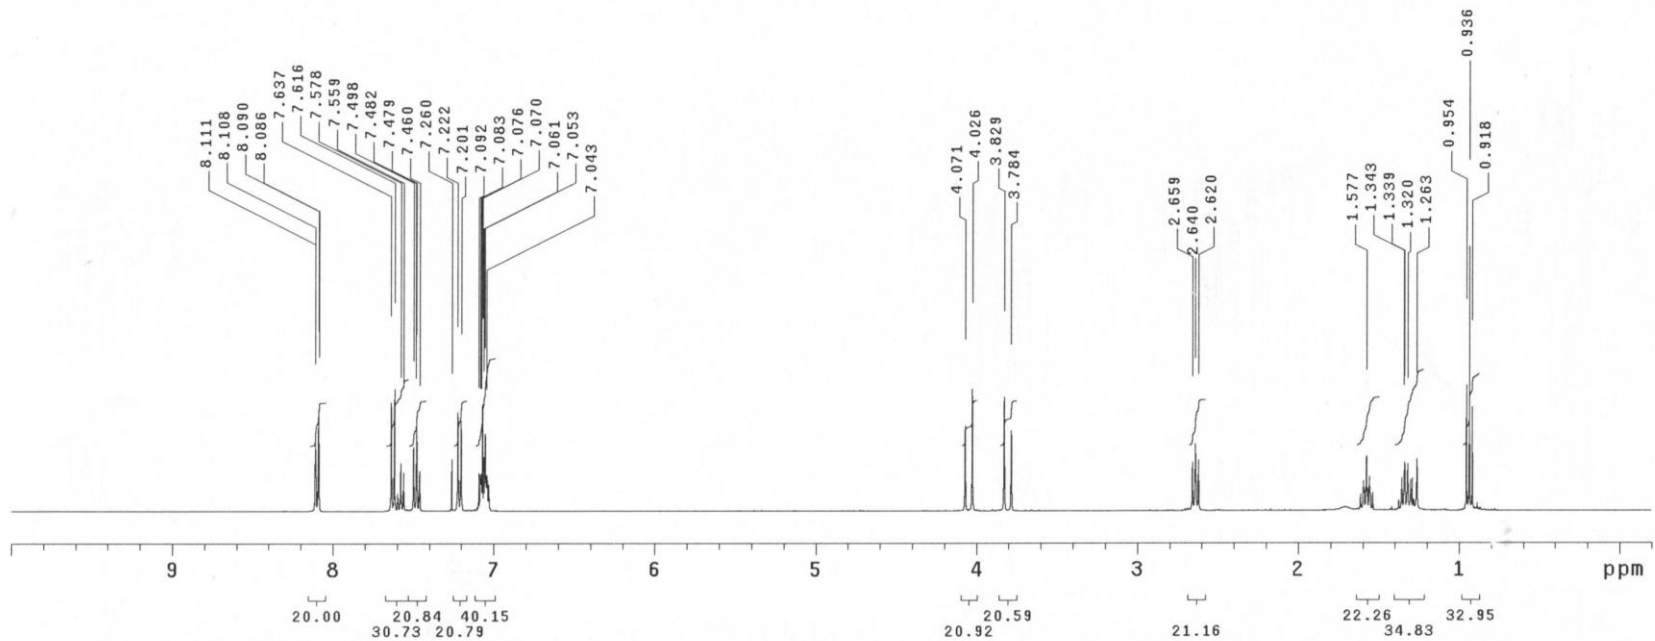



# Compound 7h (<sup>13</sup>C-NMR spectral data)

NC0701-5

Pulse Sequence: s2pu1

Solvent: CDCl<sub>3</sub>

Ambient temperature

UNITYplus-400 "unity400"

Relax. delay 0.500 sec

Pulse 65.8 degrees

Acq. time 0.800 sec

Width 25000.0 Hz

1760 repetitions

OBSERVE C13, 100.6490776 MHz

DECOUPLE H1, 400.2763980 MHz

Power 43 dB

on during acquisition

off during delay

WALTZ-16 modulated

DATA PROCESSING

Line broadening 1.0 Hz

FT size 65536

Total time 11 hr, 39 min, 7 sec

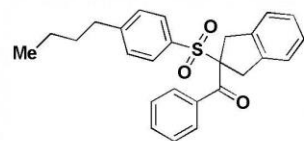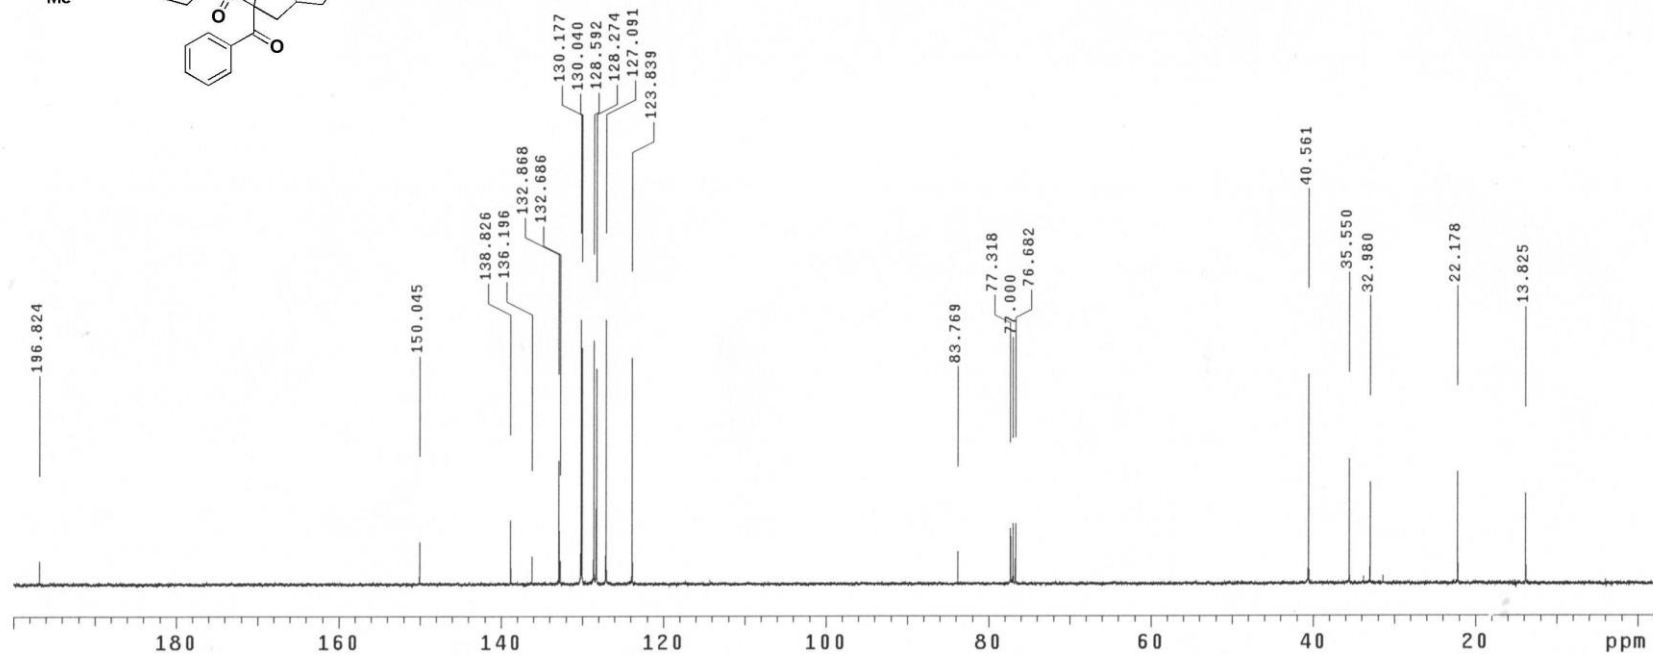

# Compound 7i (<sup>1</sup>H-NMR spectral data)

NC0707-5

Pulse Sequence: s2pu1

Solvent: CDCl<sub>3</sub>

Ambient temperature

UNITYplus-400 "unity400"

Pulse 38.8 degrees

Acq. time 3.744 sec

Width 6000.6 Hz

32 repetitions

OBSERVE H1, 400.2743814 MHz

DATA PROCESSING

FT size 65536

Total time 2 min, 0 sec

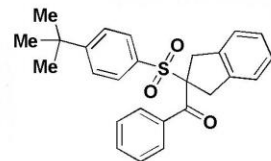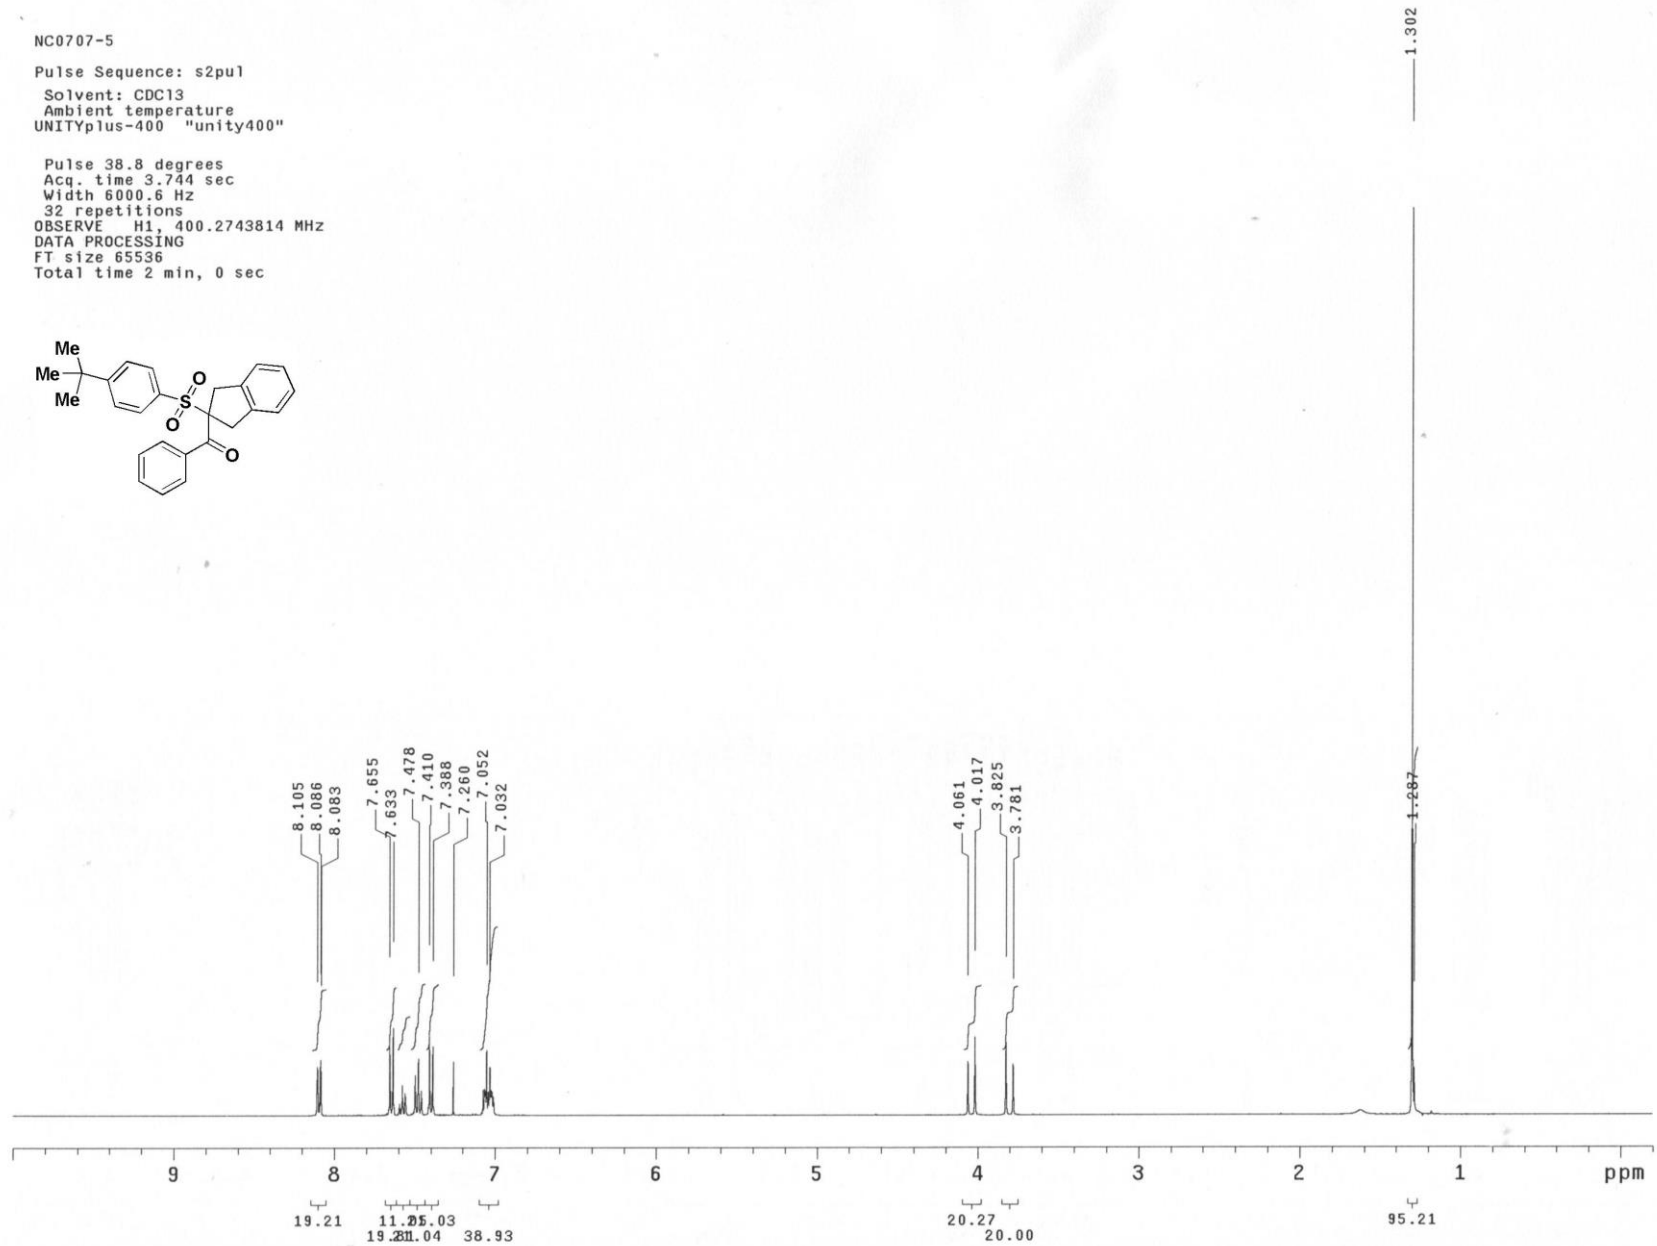

# Compound 7i (<sup>13</sup>C-NMR spectral data)

NC0707-5

Pulse Sequence: s2pu1

Solvent: CDCl<sub>3</sub>

Ambient temperature

UNITYplus-400 "unity400"

Relax. delay 0.500 sec

Pulse 65.8 degrees

Acq. time 0.800 sec

Width 25000.0 Hz

5312 repetitions

OBSERVE C13, 100.6490746 MHz

DECOUPLE H1, 400.2763980 MHz

Power 43 dB

on during acquisition

off during delay

WALTZ-16 modulated

DATA PROCESSING

Line broadening 1.0 Hz

FT size 65536

Total time 11 hr, 39 min, 7 sec

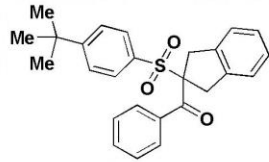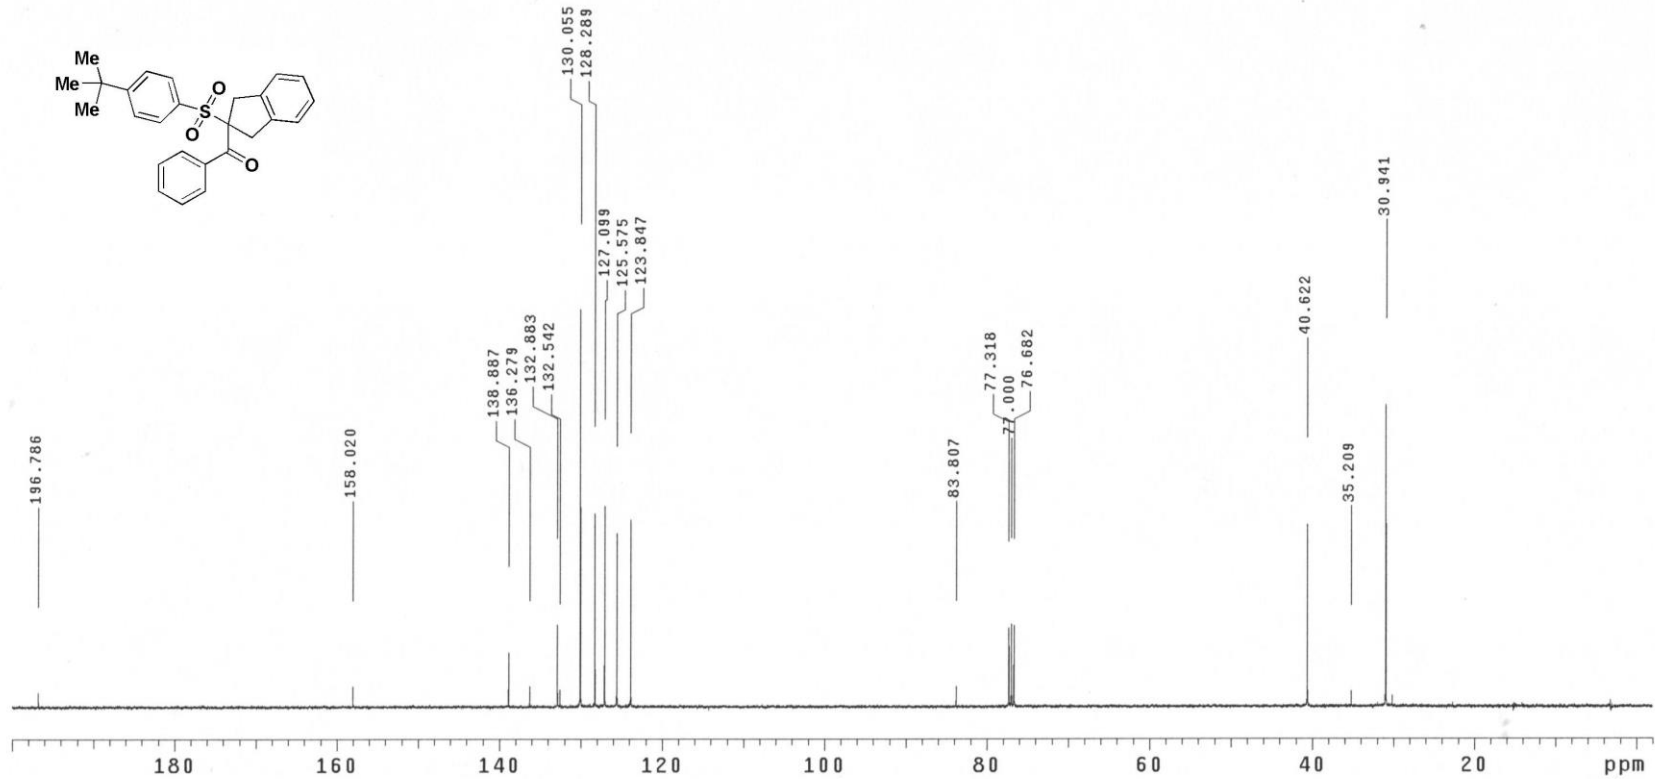

# Compound 7j (<sup>1</sup>H-NMR spectral data)

NC0720-5

Pulse Sequence: s2pu1

UNITYplus-400 "unity400"

Date: Jul 22 2020

Solvent: CDCl<sub>3</sub>

Ambient temperature

Total 32 repetitions

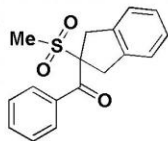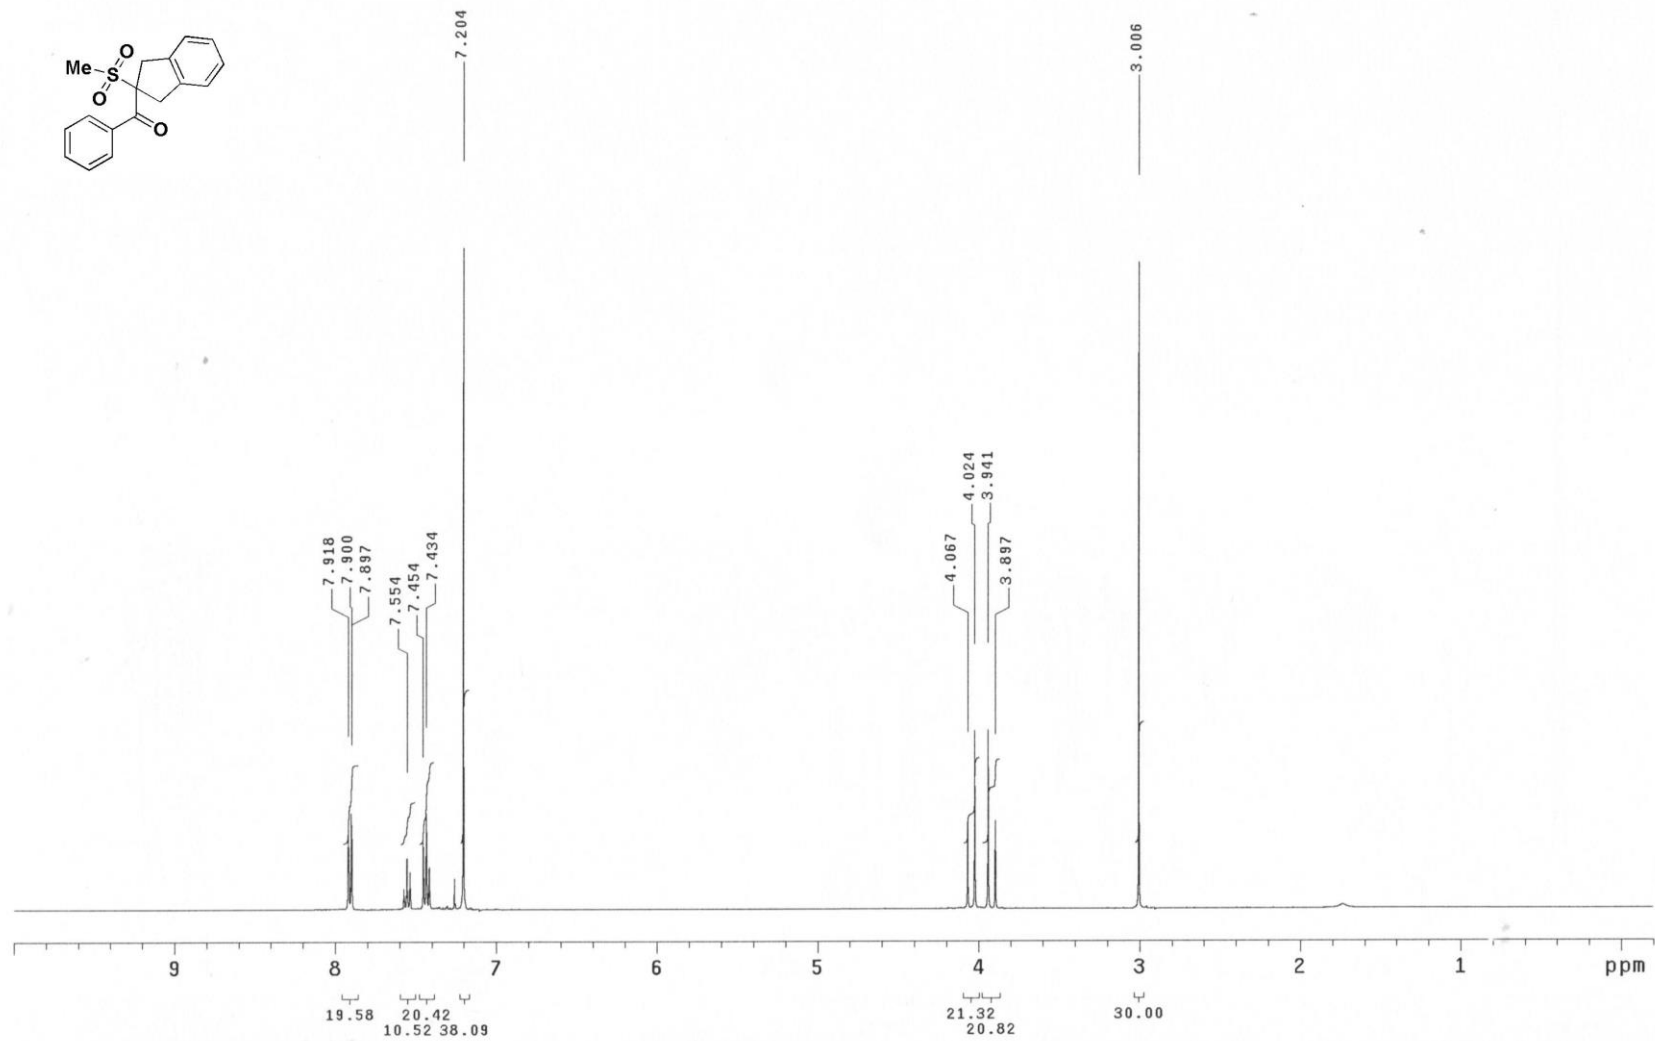

# Compound 7j (<sup>13</sup>C-NMR spectral data)

NC0720-5

Pulse Sequence: s2pu1

UNITYplus-400 "unity400"

Date: Jul 22 2020

Solvent: CDC13

Ambient temperature

Total 512 repetitions

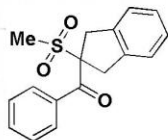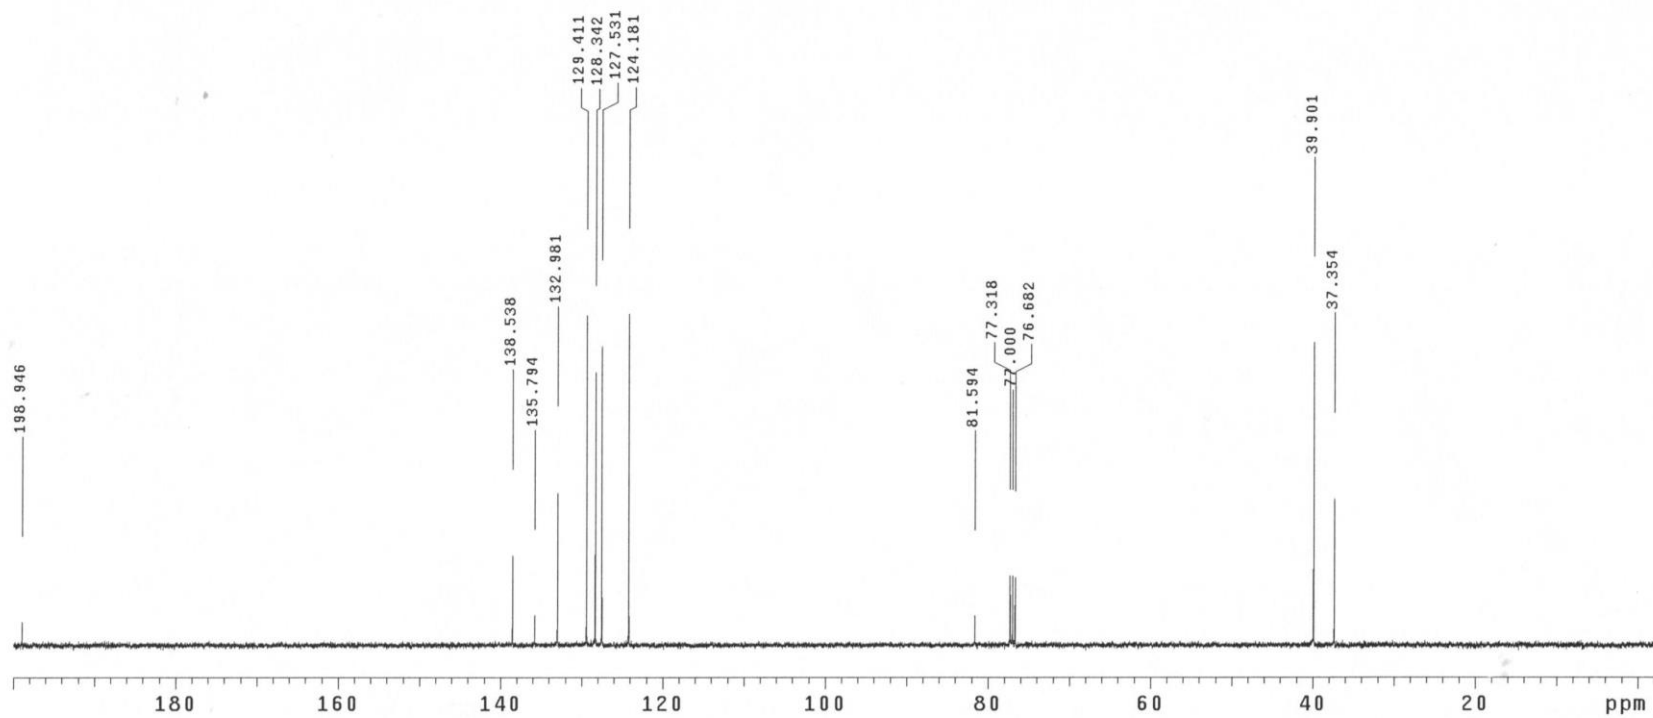

# Compound 7k (<sup>1</sup>H-NMR spectral data)

NC0713-5

Pulse Sequence: s2pu1  
UNITYplus-400 "unity400"  
Date: Jul 15 2020  
Solvent: CDCl<sub>3</sub>  
Ambient temperature  
Total 32 repetitions

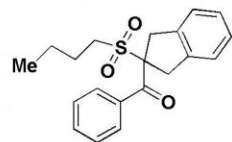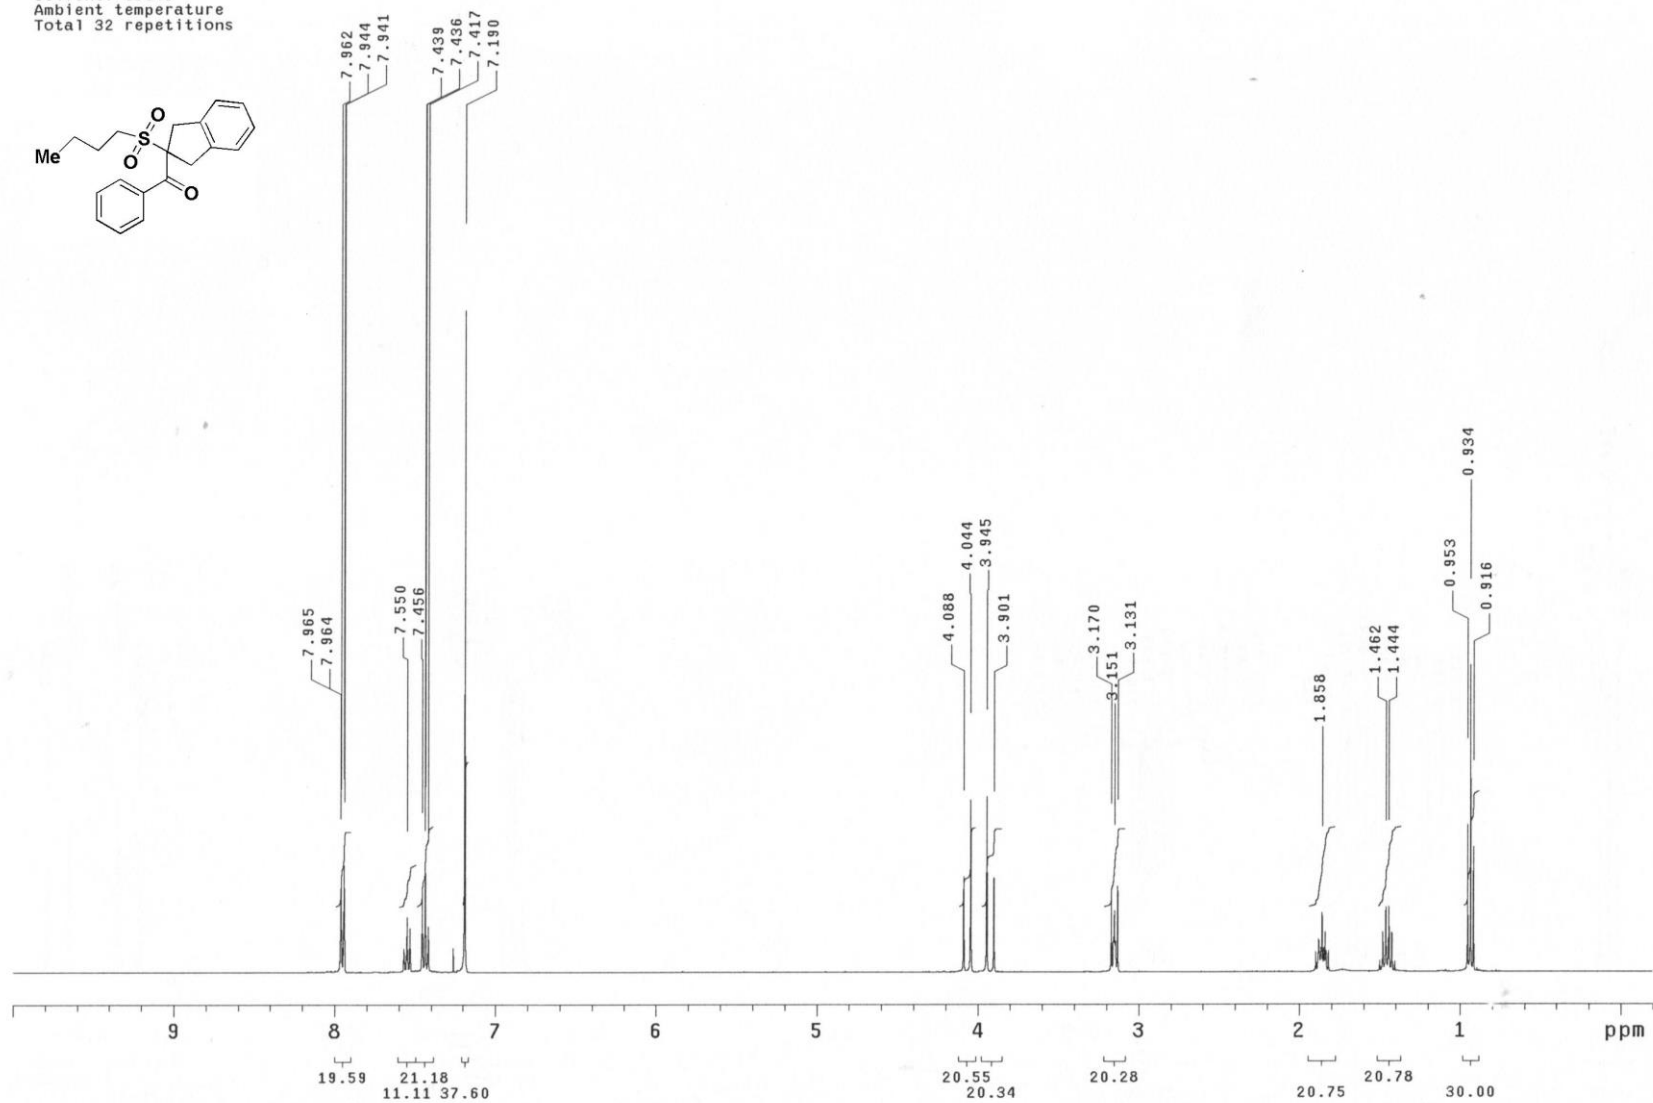

# Compound 7k (<sup>13</sup>C-NMR spectral data)

NC0713-5

Pulse Sequence: s2pu1  
UNITYplus-400 "unity400"  
Date: Jul 15 2020  
Solvent: CDC13  
Ambient temperature  
Total 32000 repetitions

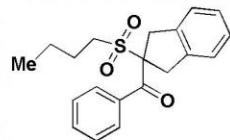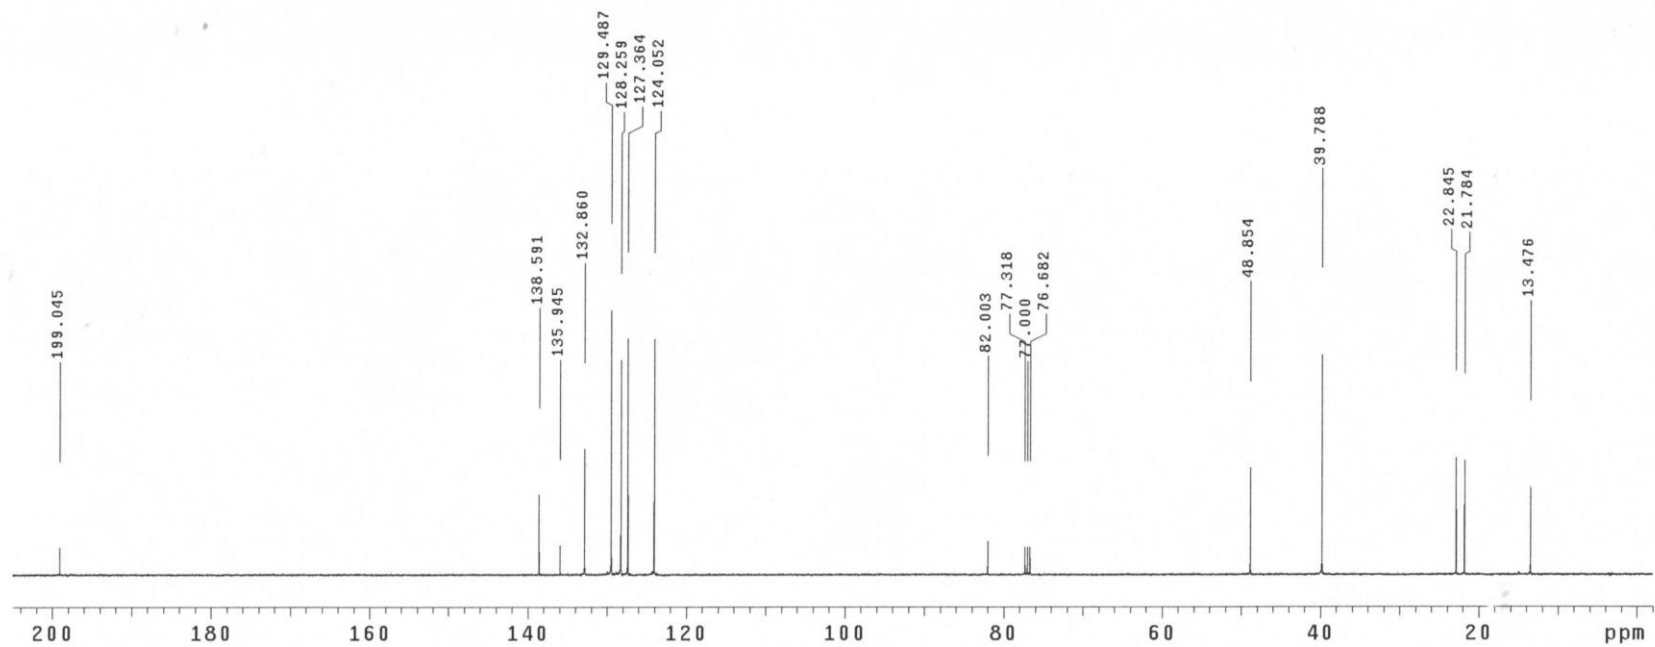

# Compound 7I (<sup>1</sup>H-NMR spectral data)

KT0609-5

Pulse Sequence: s2pu1  
UNITYplus-400 "unity400"  
Date: Jun 9 2020  
Solvent: CDCl<sub>3</sub>  
Ambient temperature  
Total 32 repetitions

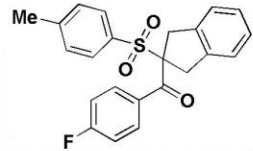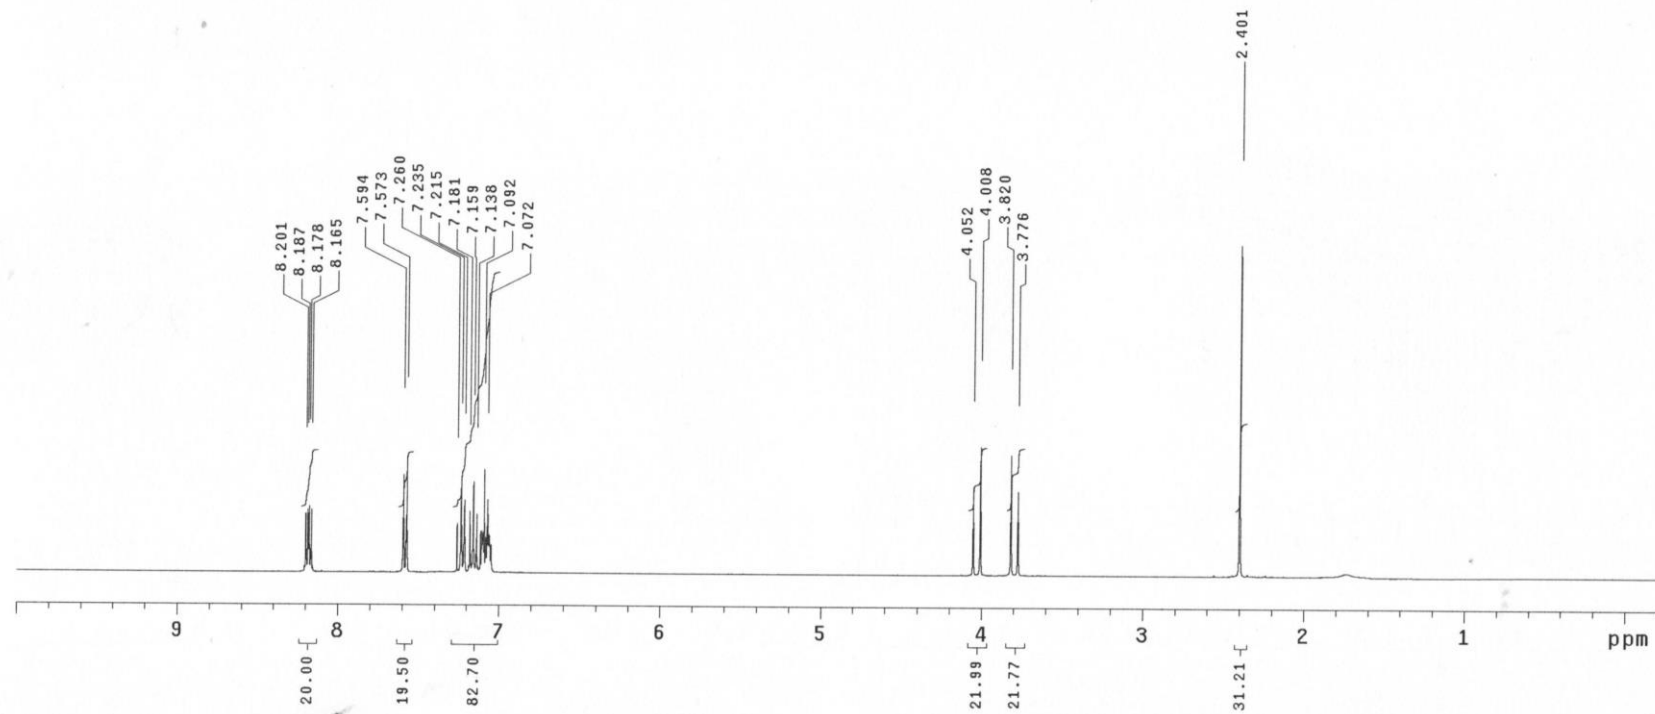



# Compound 7I (<sup>13</sup>C-NMR spectral data)

KT0609-5

Pulse Sequence: s2pu1  
UNITYplus-400 "unity400"  
Date: Jun 9 2020  
Solvent: CDC13  
Ambient temperature  
Total 3024 repetitions

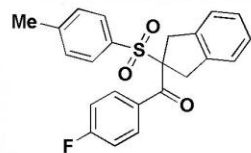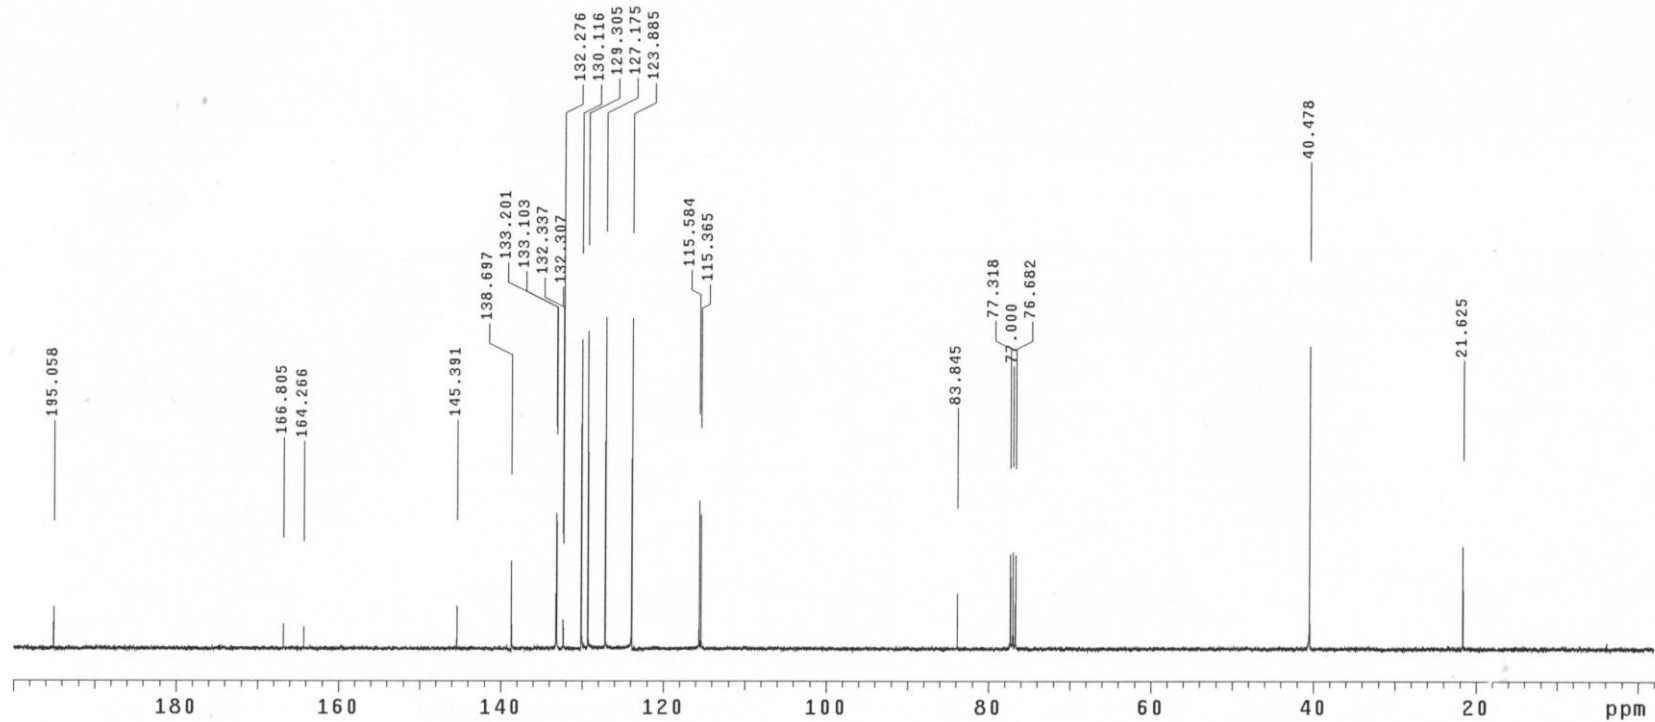

# Compound 7m (<sup>1</sup>H-NMR spectral data)

KT0512-5

Pulse Sequence: s2pu1  
UNITYplus-400 "unity400"  
Date: May 12 2020  
Solvent: CDCl3  
Ambient temperature  
Total 32 repetitions

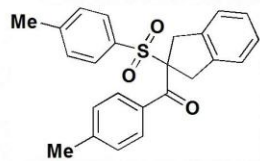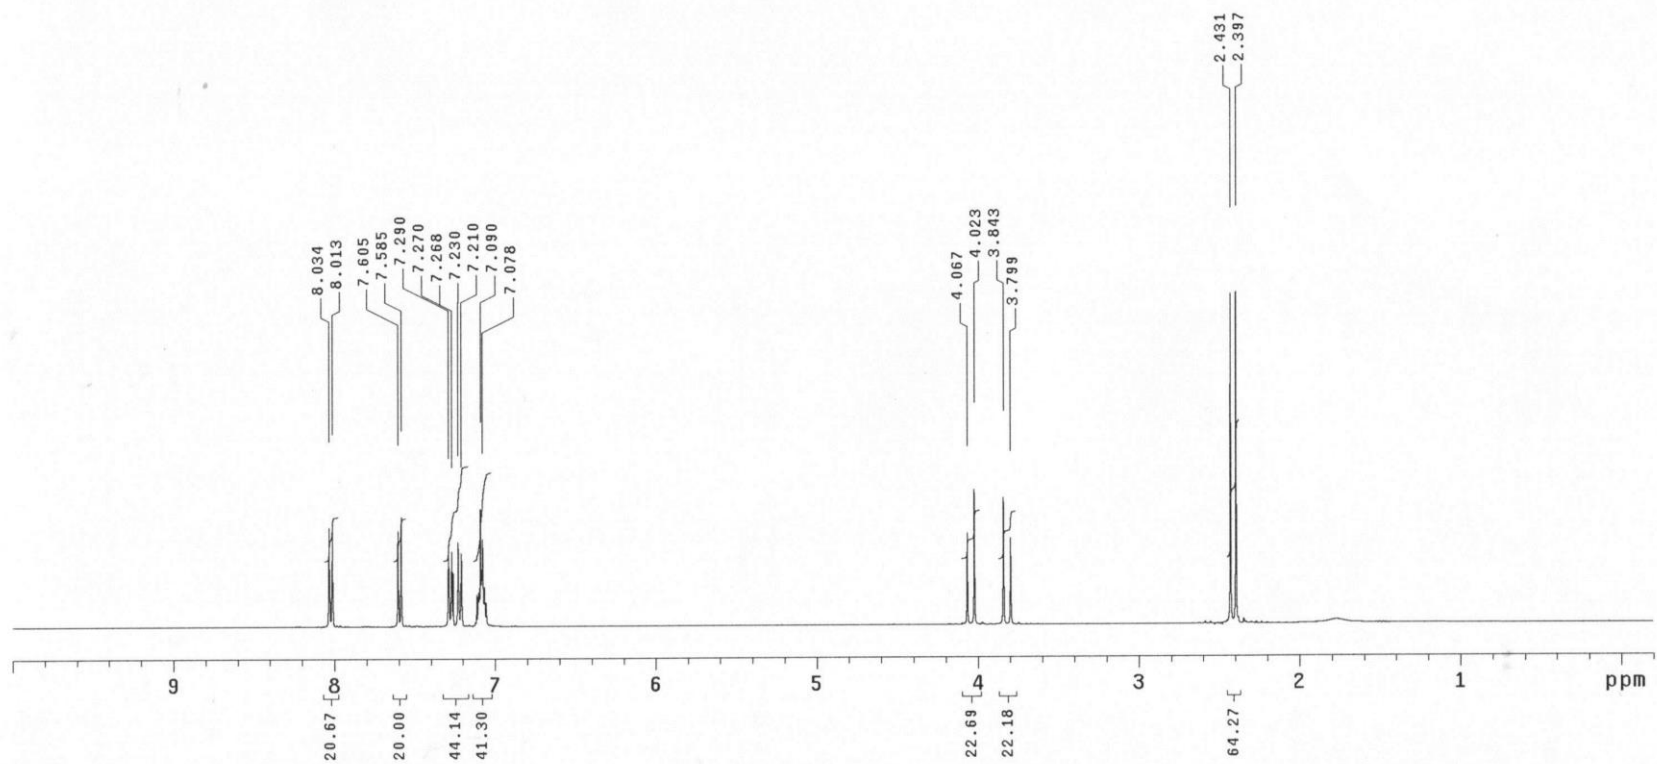

# Compound 7m (<sup>13</sup>C-NMR spectral data)

KT0512-5

Pulse Sequence: s2pu1  
UNITYplus-400 "unity400"  
Date: May 12 2020  
Solvent: CDCl<sub>3</sub>  
Ambient temperature  
Total 1520 repetitions

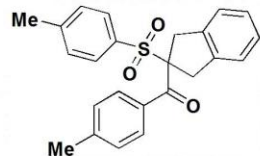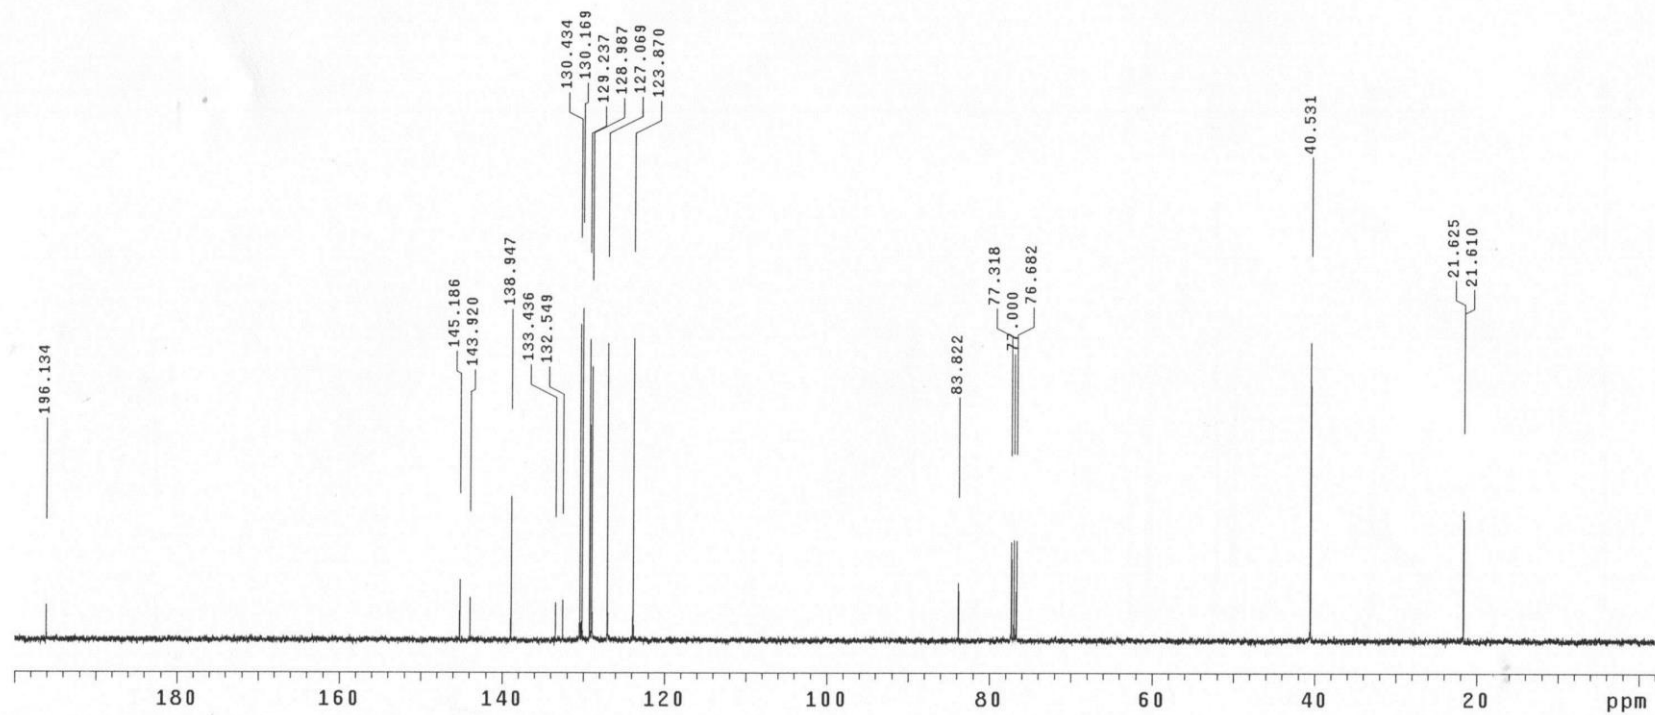

# Compound 7n (<sup>1</sup>H-NMR spectral data)

NC0610-5

Pulse Sequence: s2pu1  
UNITYplus-400 "unity400"  
Date: Jun 11 2020  
Solvent: CDCl<sub>3</sub>  
Ambient temperature  
Total 32 repetitions

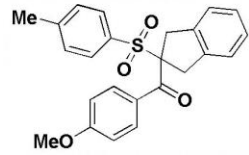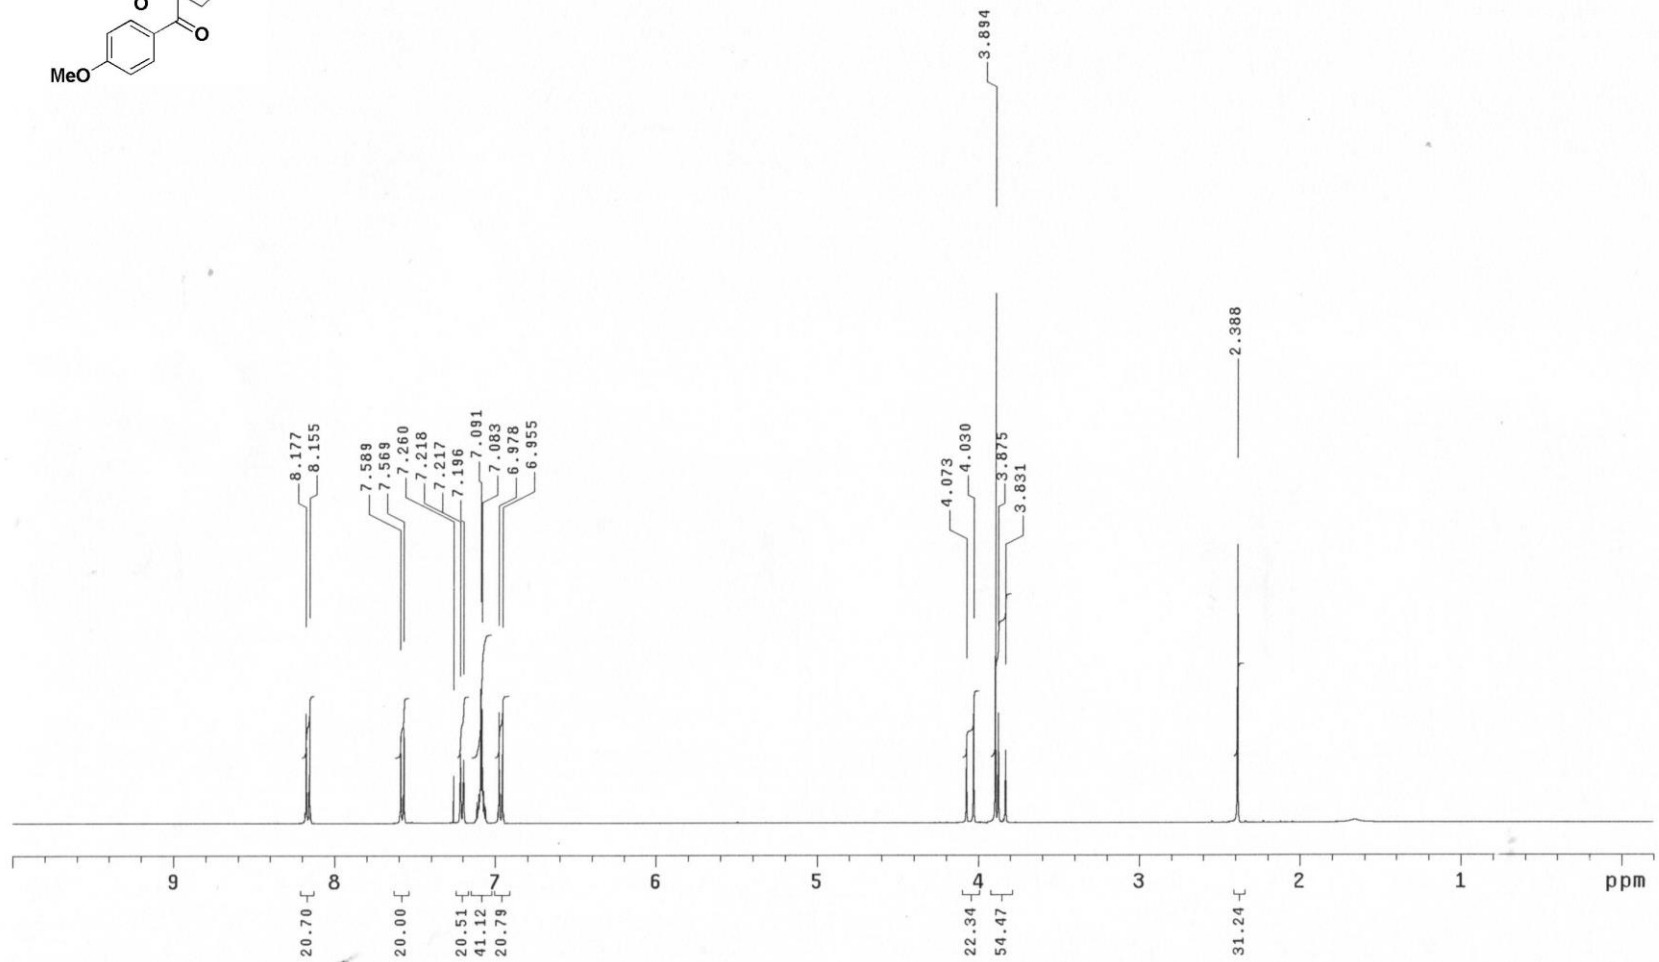

# Compound 7n (<sup>13</sup>C-NMR spectral data)

NC0610-5

Pulse Sequence: s2pu1

UNITYplus-400 "unity400"

Date: Jun 11 2020

Solvent: CDCl<sub>3</sub>

Ambient temperature

Total 720 repetitions

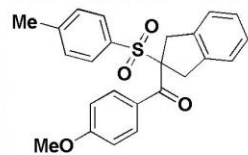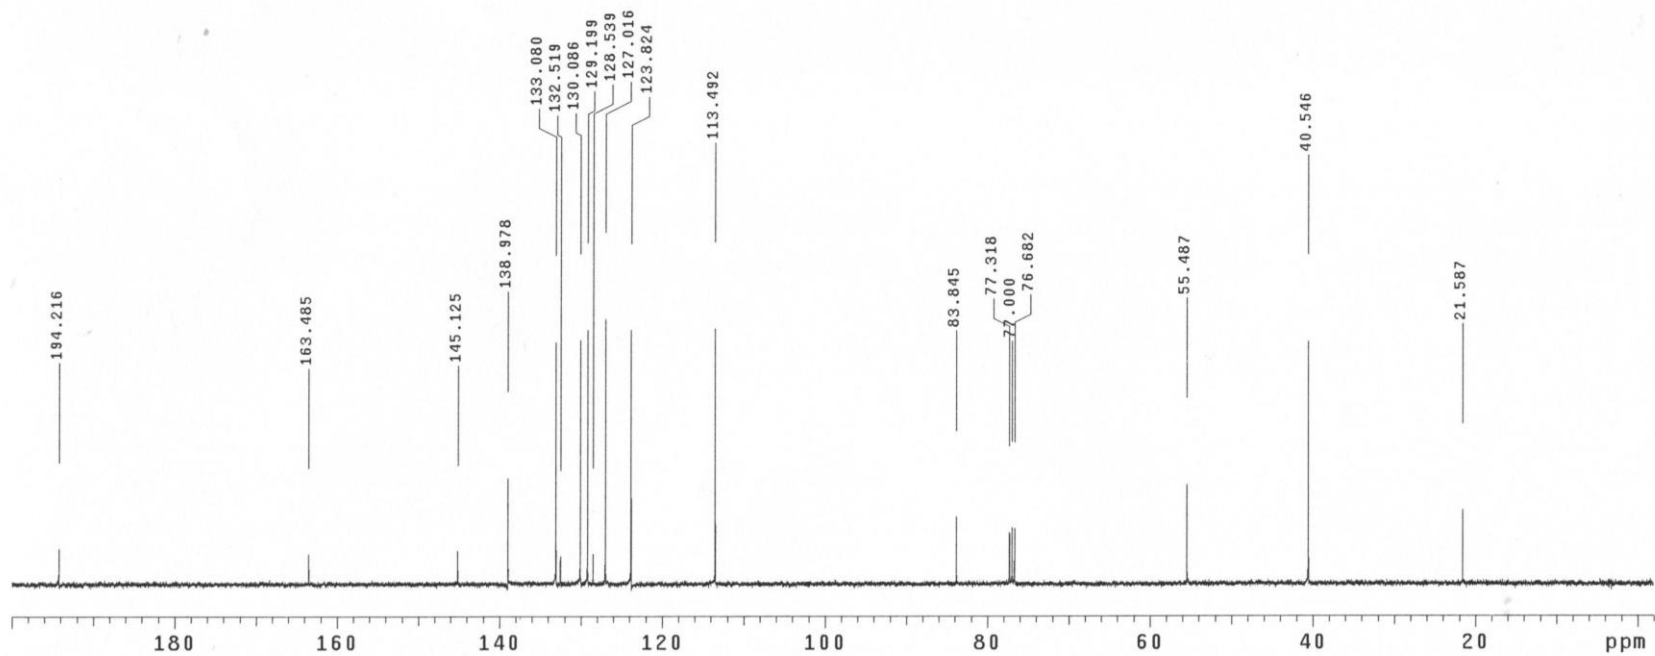

# Compound 7o (<sup>1</sup>H-NMR spectral data)

NC0723-5

Pulse Sequence: s2pu1

UNITYplus-400 "unity400"

Date: Jul 27 2020

Solvent: CDCl<sub>3</sub>

Ambient temperature

Total 32 repetitions

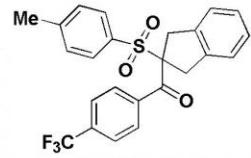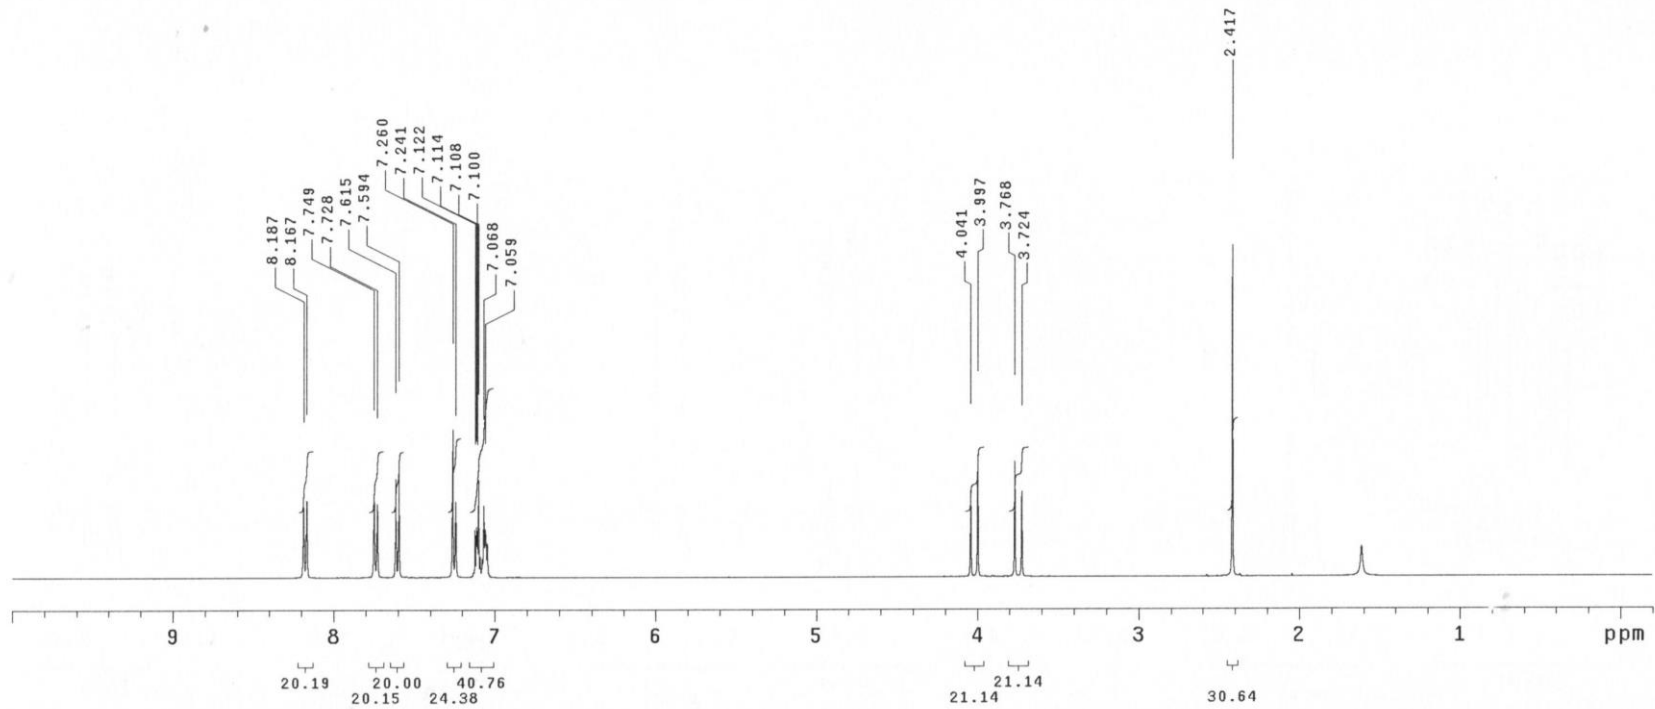

# Compound 7o (<sup>13</sup>C-NMR spectral data)

NC0723-5

Pulse Sequence: s2pu1

UNITYplus-400 "unity400"

Date: Jul 27 2020

Solvent: CDC13

Ambient temperature

Total 3120 repetitions

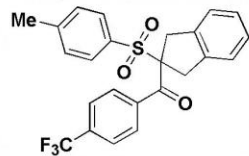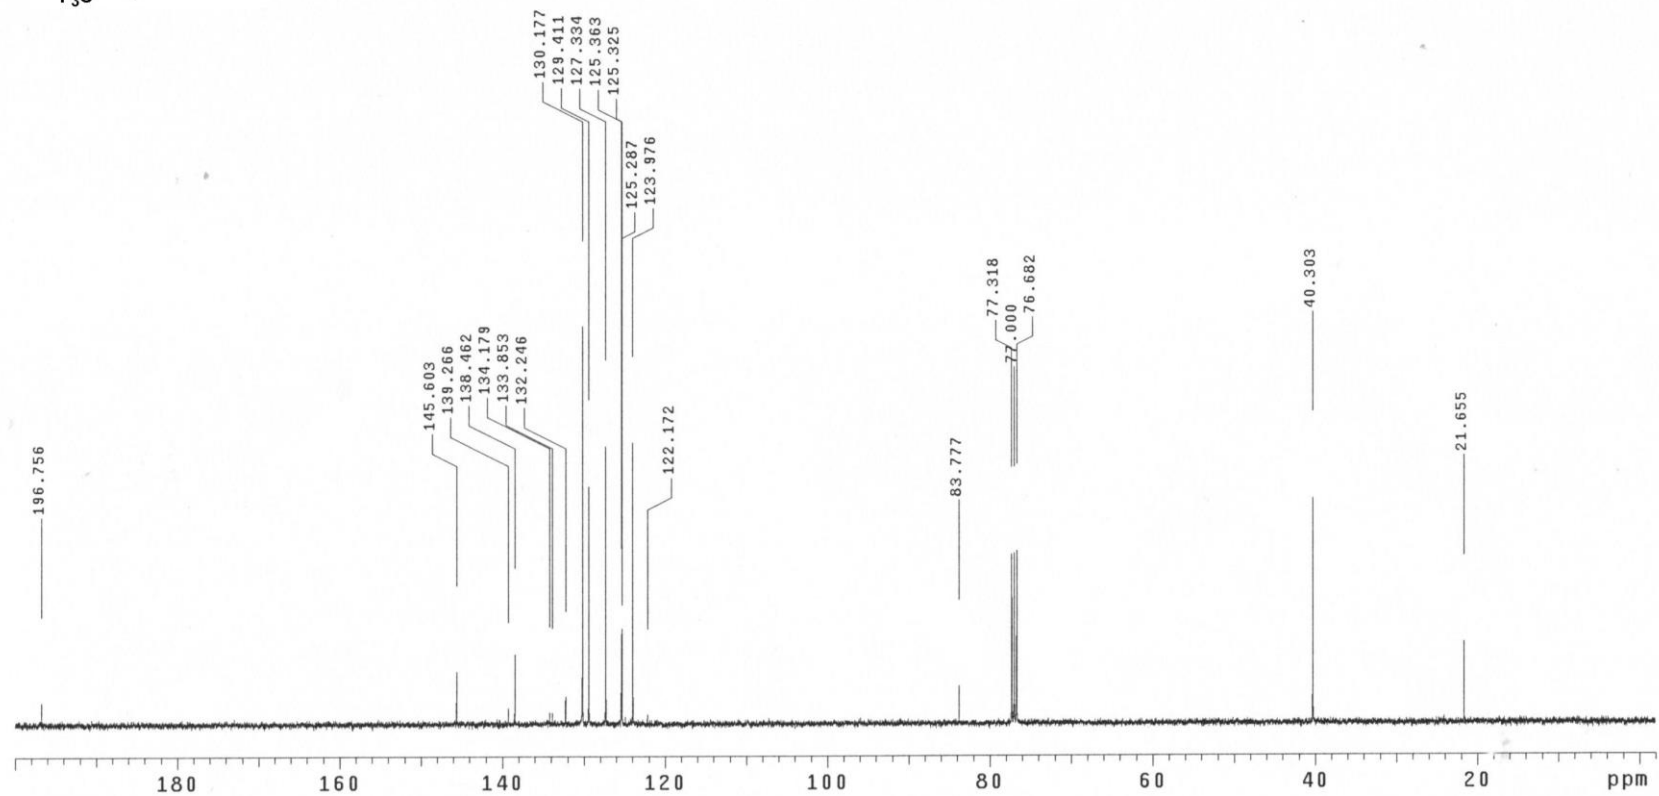

# Compound 7p (<sup>1</sup>H-NMR spectral data)

NC0615-5

Pulse Sequence: s2pu1

UNITYplus-400 "unity400"

Date: Jul 30 2020

Solvent: CDCl<sub>3</sub>

Ambient temperature

Total 32 repetitions

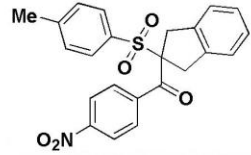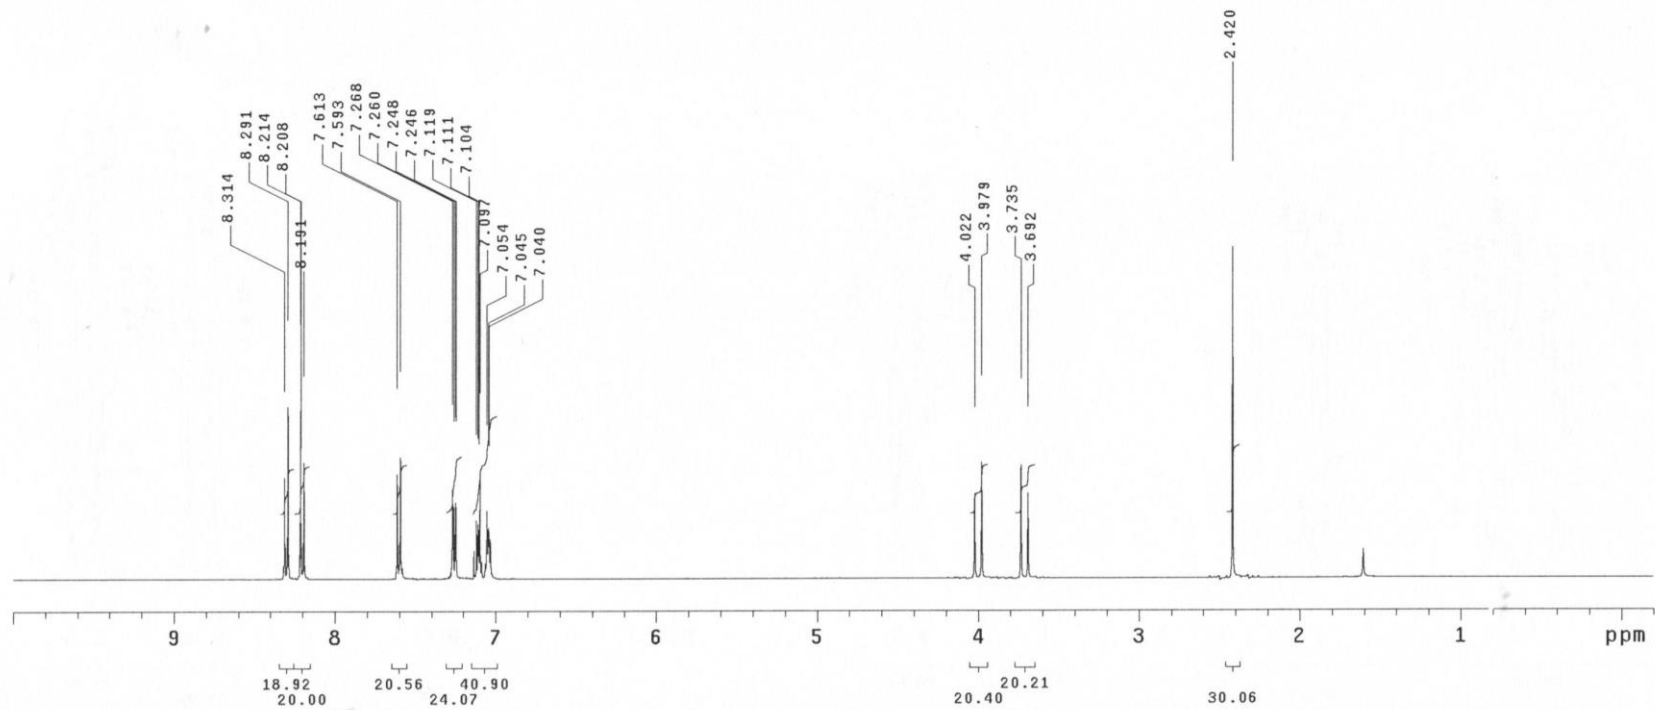



# Compound 7p (<sup>13</sup>C-NMR spectral data)

NC0615-5

Pulse Sequence: s2pu1

UNITYplus-400 "unity400"

Date: Jul 30 2020

Solvent: CDCl<sub>3</sub>

Ambient temperature

Total 1136 repetitions

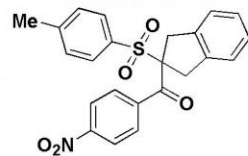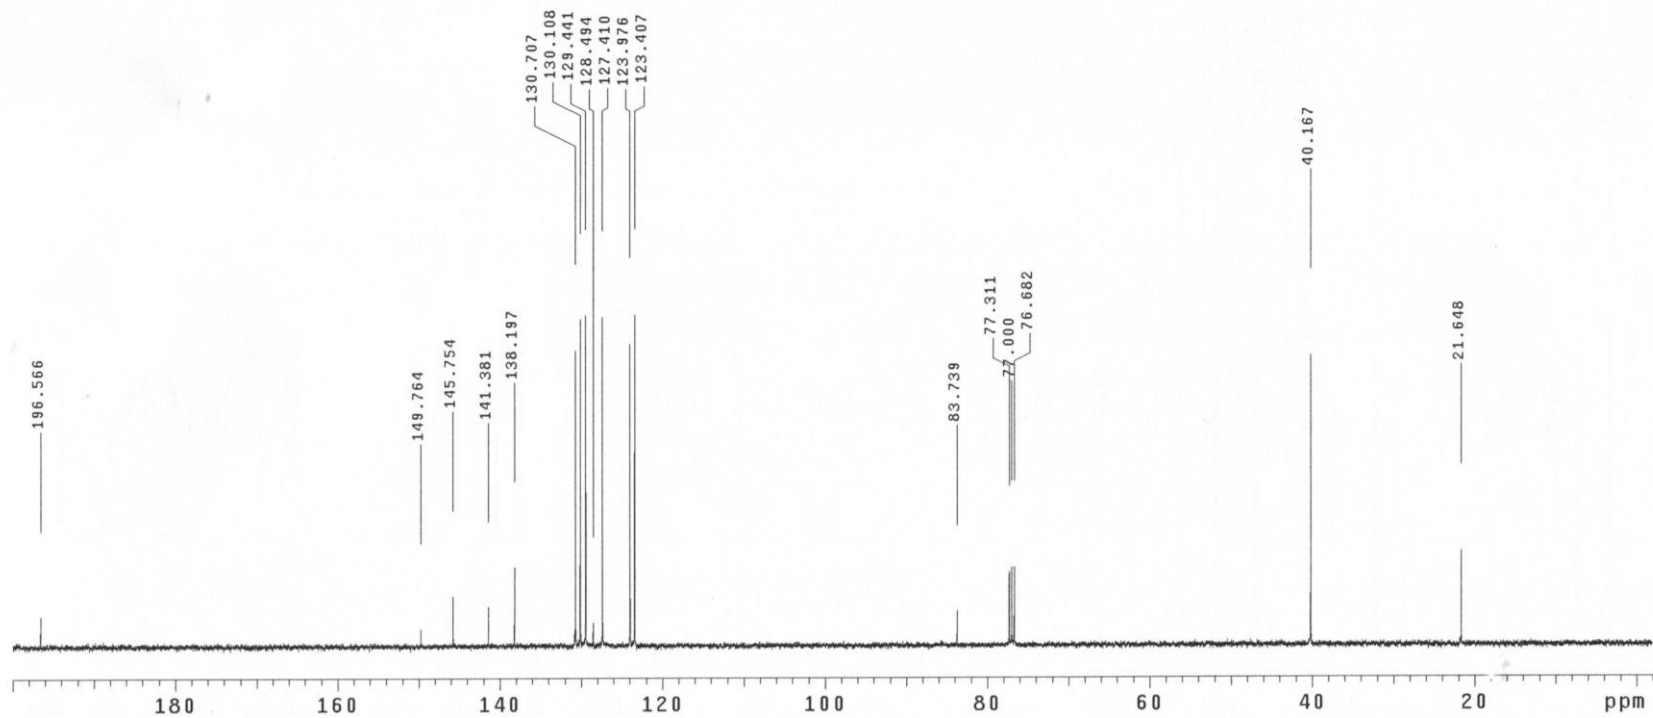

# Compound 7q (<sup>1</sup>H-NMR spectral data)

NC0630-5

Pulse Sequence: s2pu1  
Solvent: CDC13  
Ambient temperature  
UNITYplus-400 "unity400"

Pulse 38.8 degrees  
Acq. time 3.744 sec  
Width 6000.6 Hz  
32 repetitions  
OBSERVE H1, 400.2743817 MHz  
DATA PROCESSING  
FT size 65536  
Total time 2 min, 0 sec

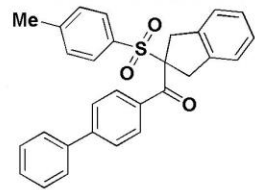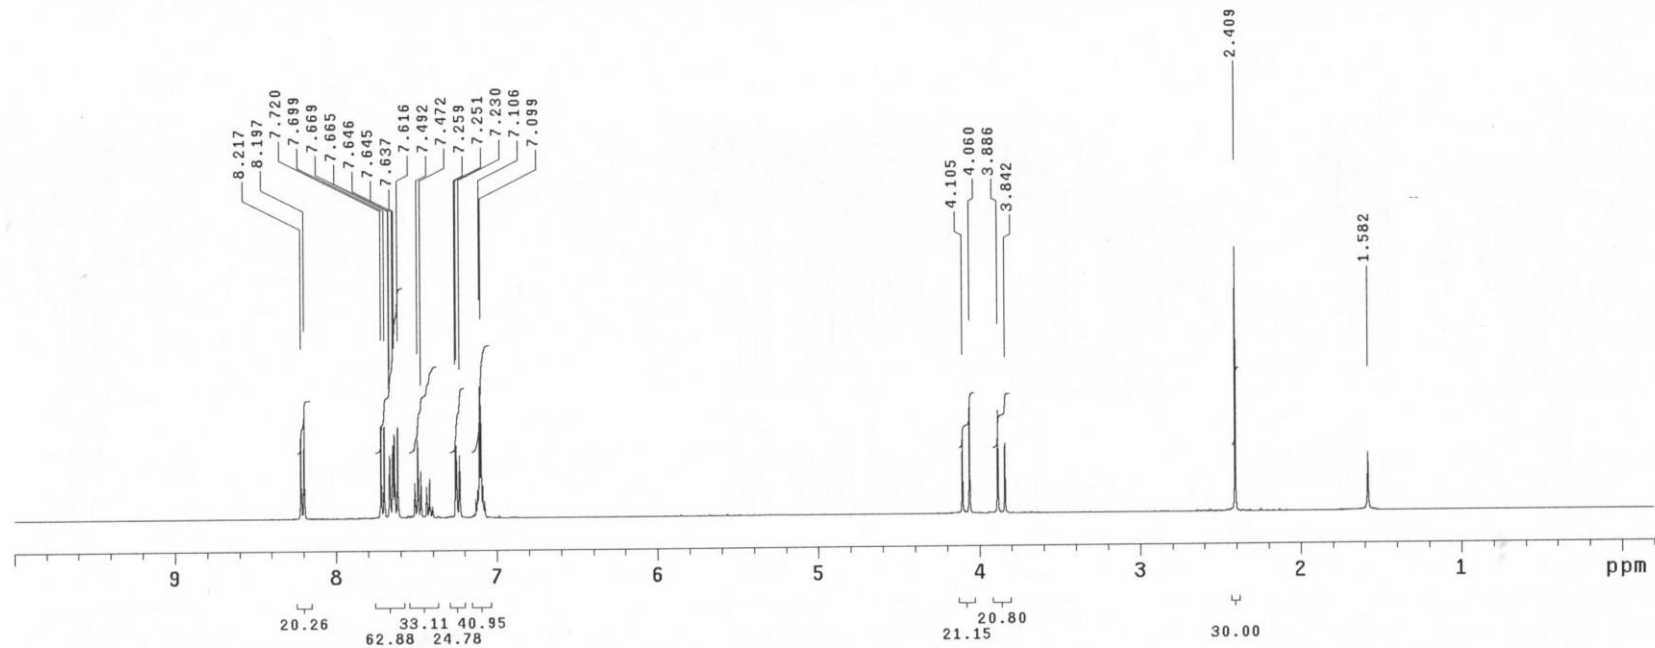

# Compound 7q (<sup>13</sup>C-NMR spectral data)

NC0630-5

Pulse Sequence: s2pu1  
Solvent: CDC13  
Ambient temperature  
UNITYplus-400 "unity400"

Relax. delay 0.500 sec  
Pulse 65.8 degrees  
Acq. time 0.800 sec  
Width 25000.0 Hz  
2480 repetitions  
OBSERVE C13, 100.6490746 MHz  
DECOUPLE H1, 400.2763980 MHz  
Power 43 dB  
on during acquisition  
off during delay  
WALTZ-16 modulated  
DATA PROCESSING  
Line broadening 1.0 Hz  
FT size 65536  
Total time 11 hr, 39 min, 7 sec

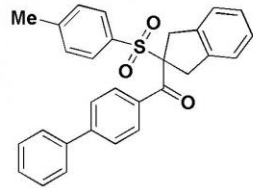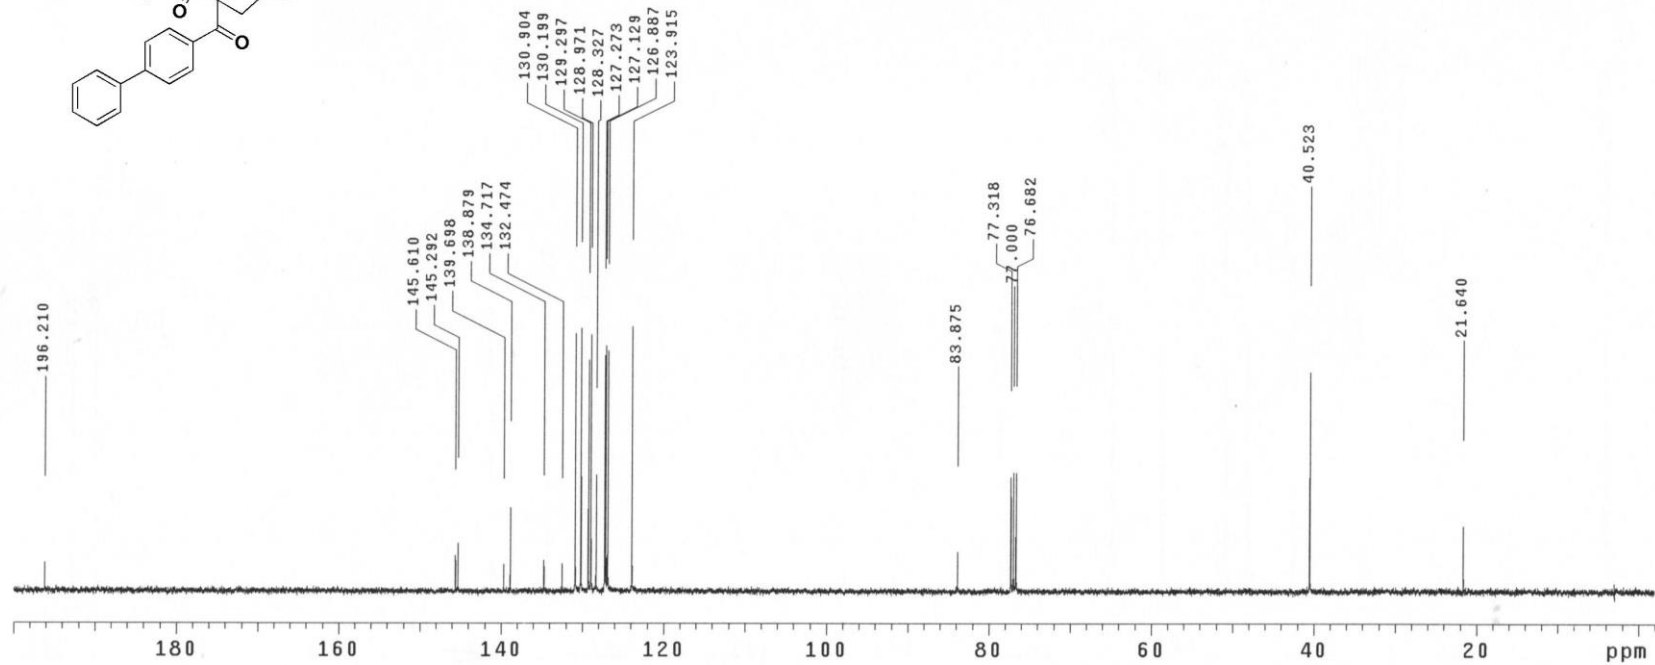

# Compound 7r (<sup>1</sup>H-NMR spectral data)

NC0616-5

Pulse Sequence: s2pu1

UNITYplus-600 "KMU600.kmu.edu.tw"

Date: Jun 18 2020

Solvent: cdc13

Temp. 28.0 C / 301.1 K

Total 16 repetitions

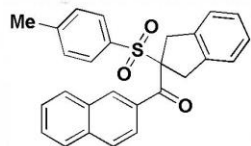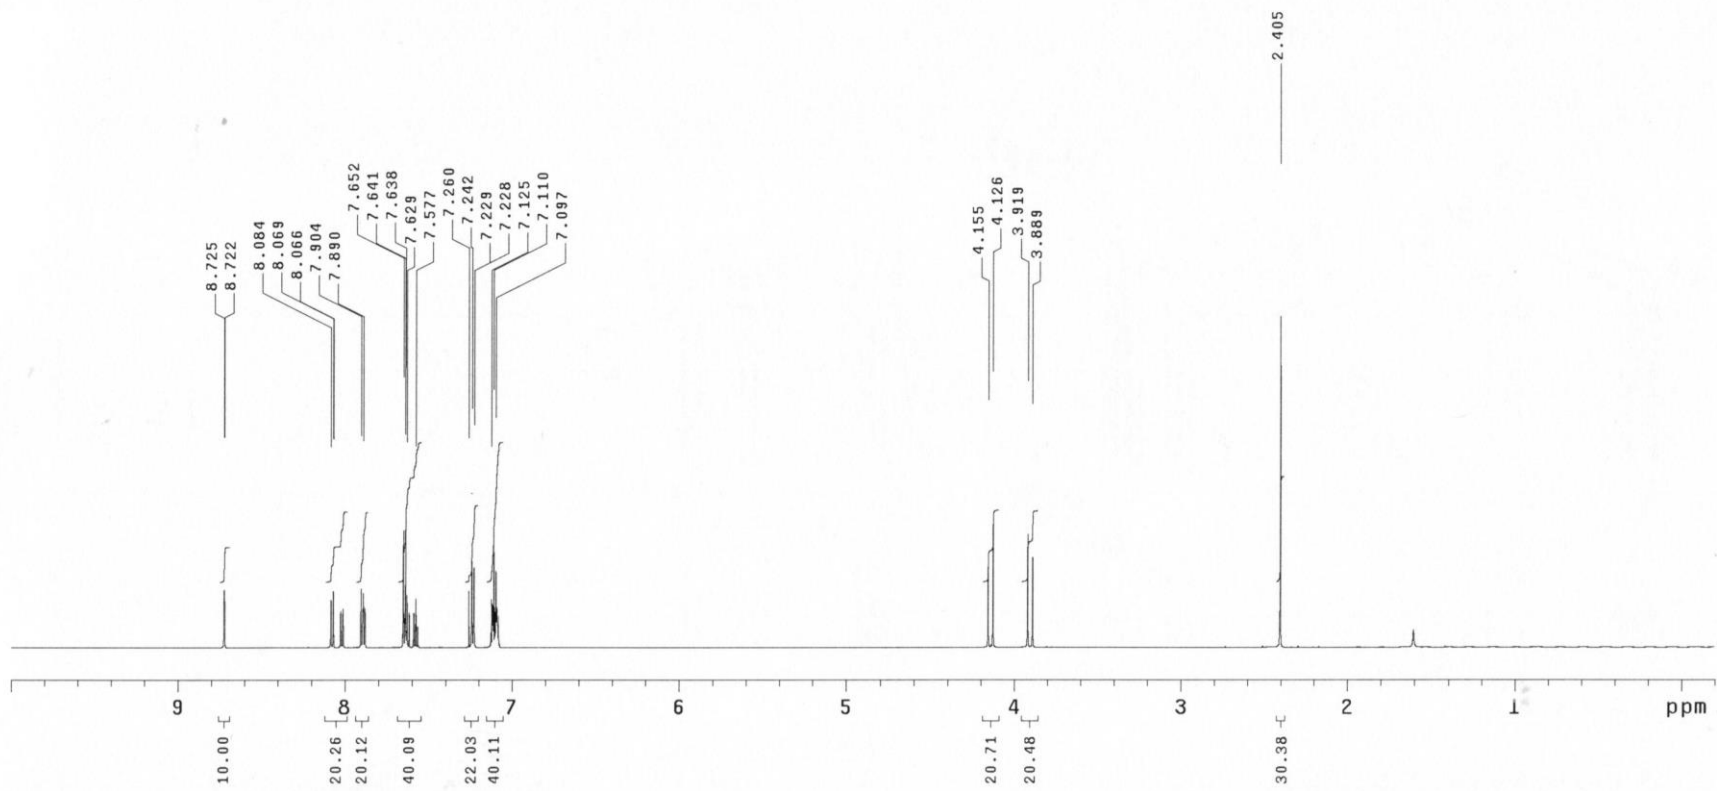

# Compound 7r (<sup>13</sup>C-NMR spectral data)

NC0616-5

Pulse Sequence: s2pu1  
UNITYplus-600 "KMU600.kmu.edu.tw"  
Date: Jun 18 2020  
Solvent: cdc13  
Temp. 28.0 C / 301.1 K  
Total 128 repetitions

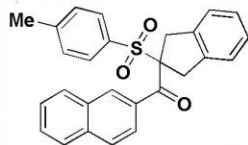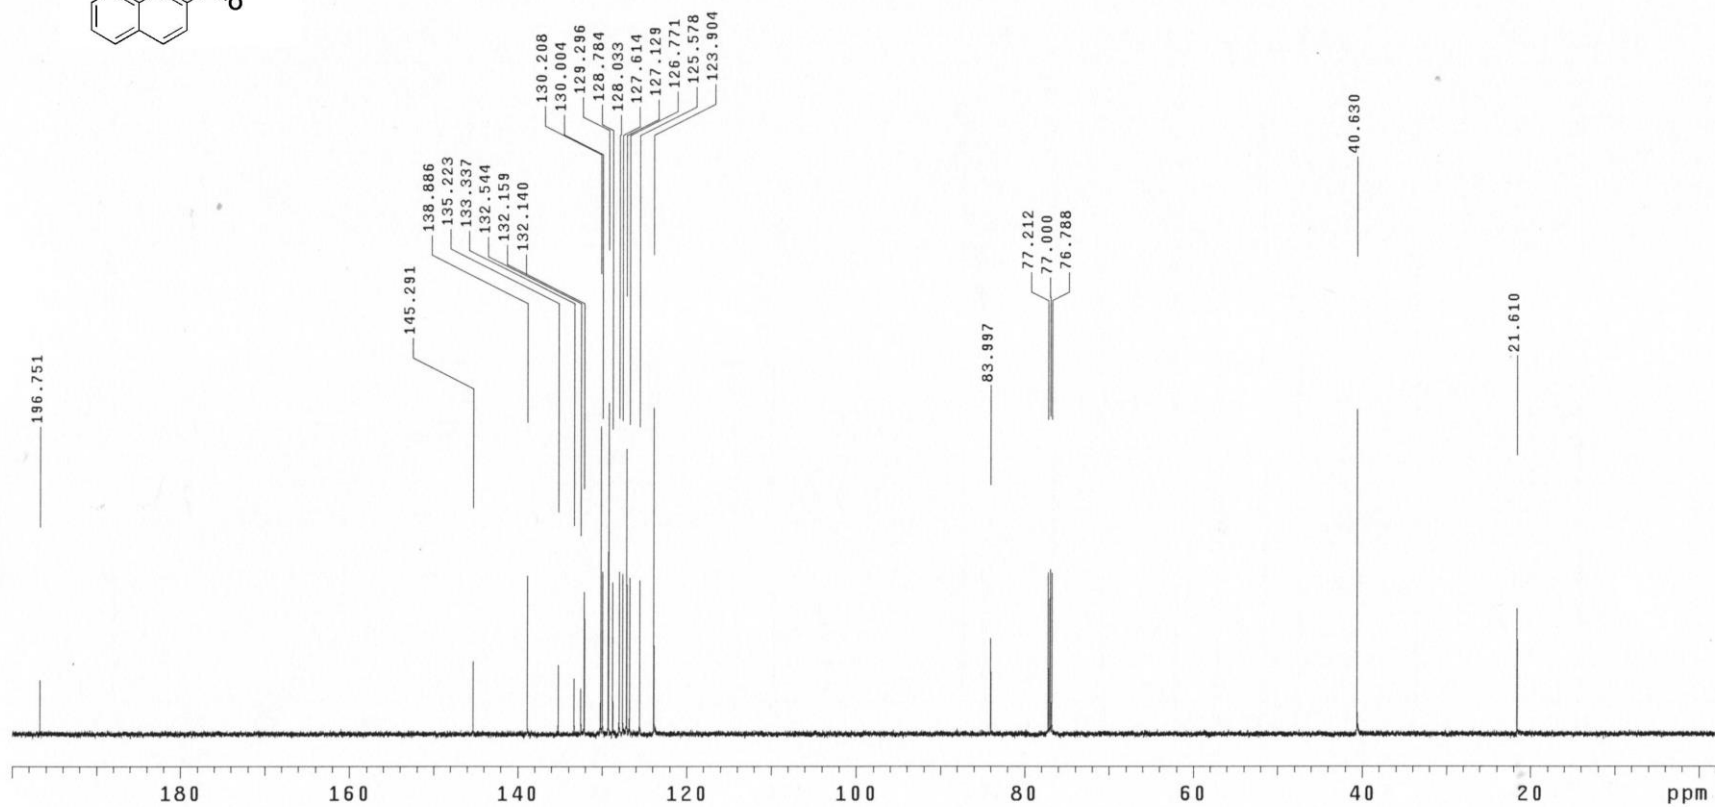

# Compound 7s (<sup>1</sup>H-NMR spectral data)

NC0728-5

Pulse Sequence: s2pu1

UNITYplus-400 "unity400"

Date: Jul 29 2020

Solvent: CDCl<sub>3</sub>

Ambient temperature

Total 32 repetitions

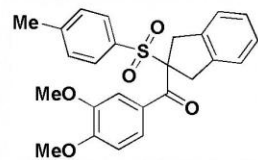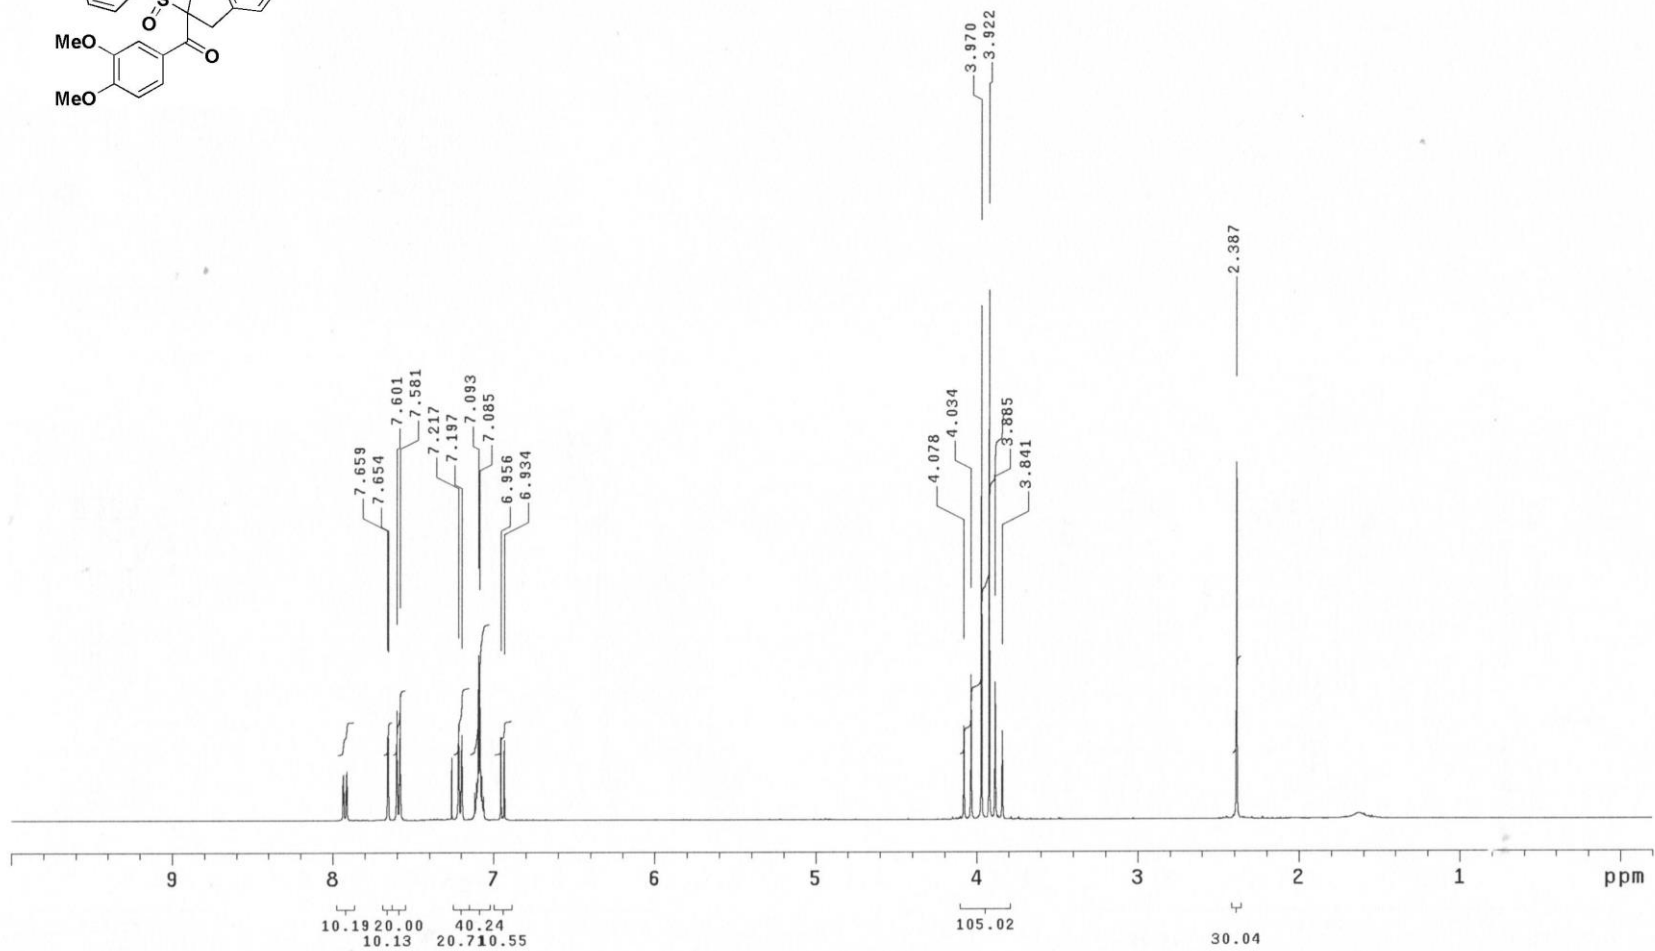

# Compound 7s (<sup>13</sup>C-NMR spectral data)

NC0728-5

Pulse Sequence: s2pu1

UNITYplus-400 "unity400"

Date: Jul 29 2020

Solvent: CDCl<sub>3</sub>

Ambient temperature

Total 848 repetitions

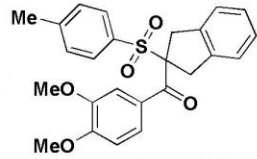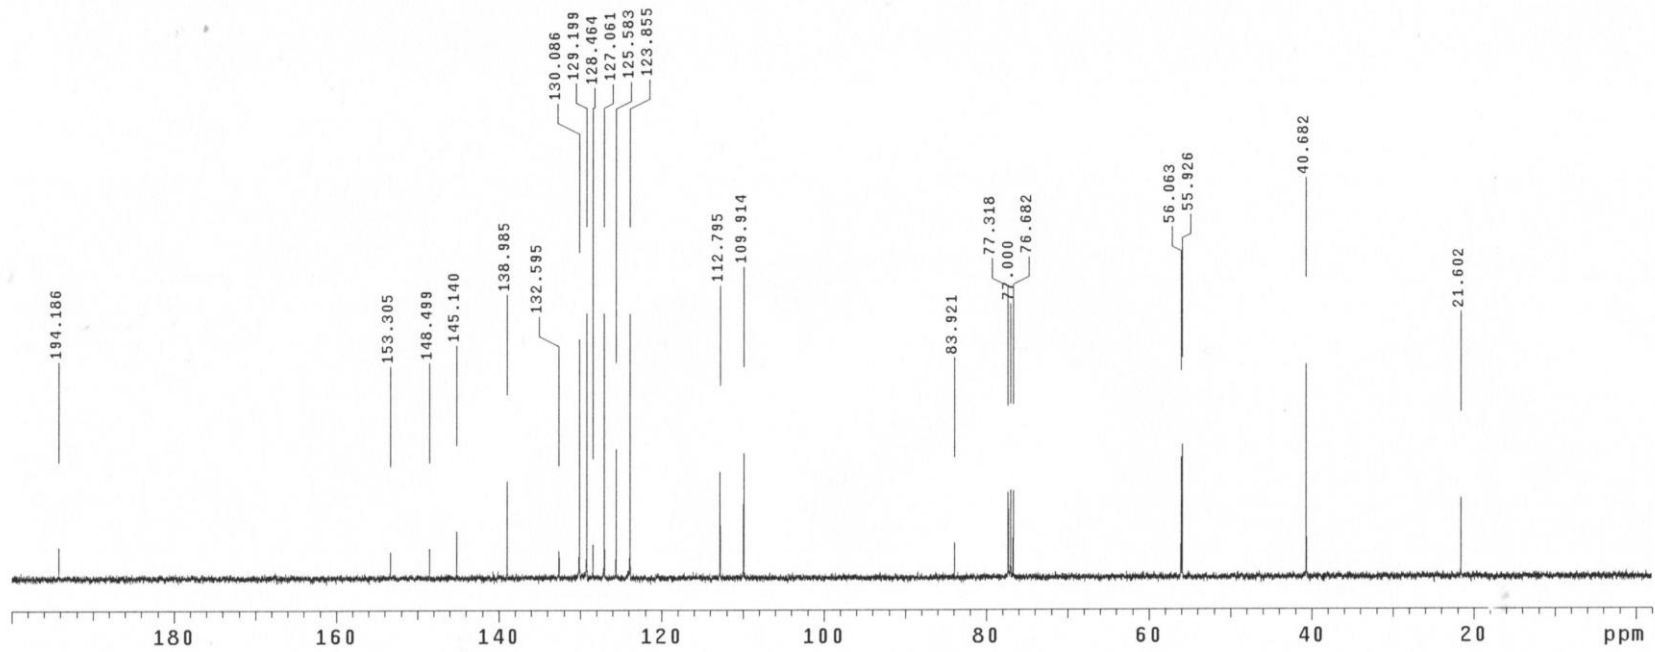

# Compound 7t (<sup>1</sup>H-NMR spectral data)

NC0724-5

Pulse Sequence: s2pu1

UNITYplus-400 "unity400"

Date: Jul 27 2020

Solvent: CDCl<sub>3</sub>

Ambient temperature

Total 32 repetitions

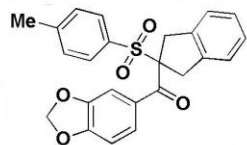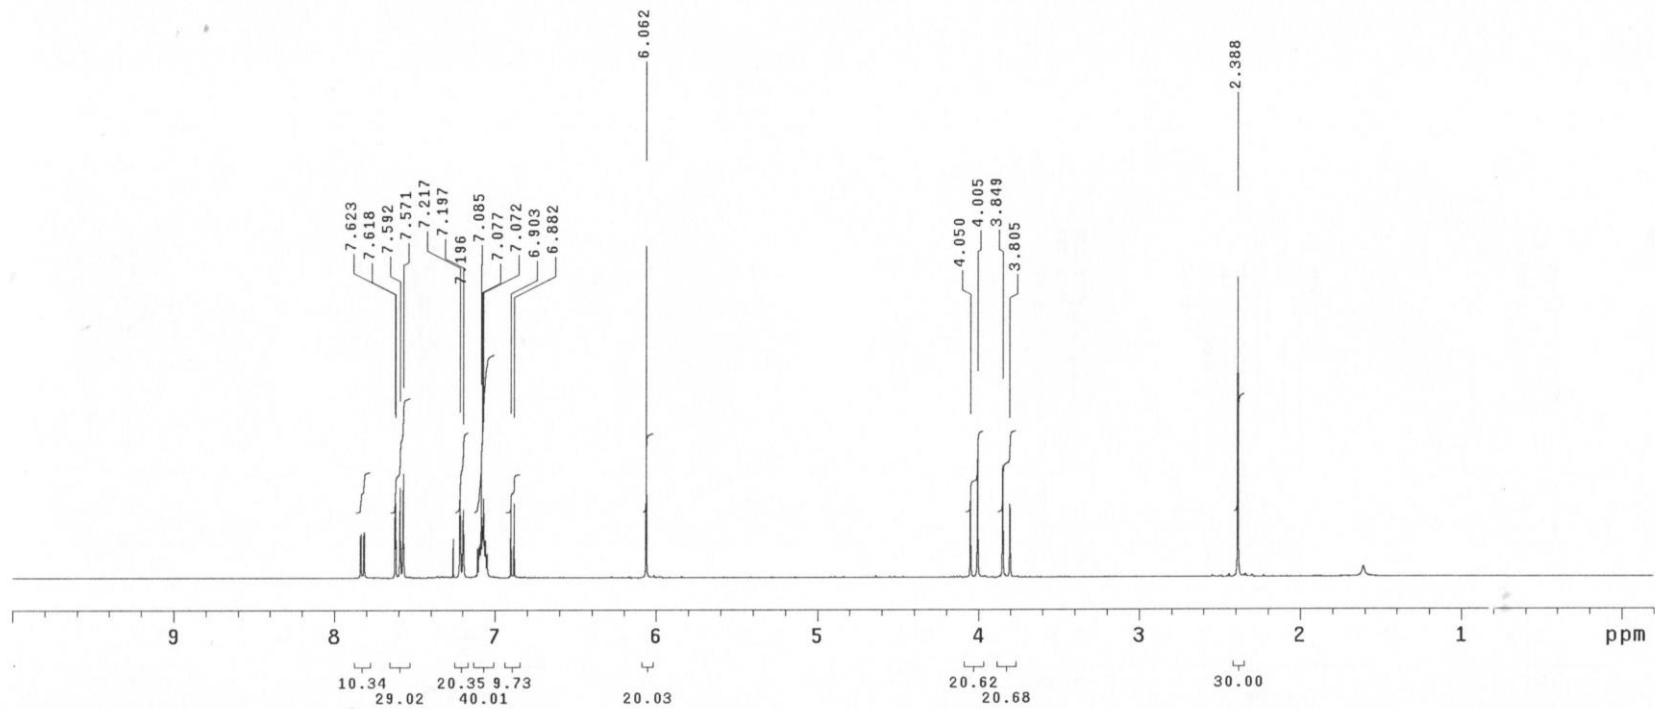



# Compound 7t (<sup>13</sup>C-NMR spectral data)

NC0724-5

Pulse Sequence: s2pu1

UNITYplus-400 "unity400"

Date: Jul 27 2020

Solvent: CDC13

Ambient temperature

Total 1056 repetitions

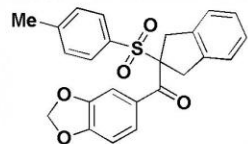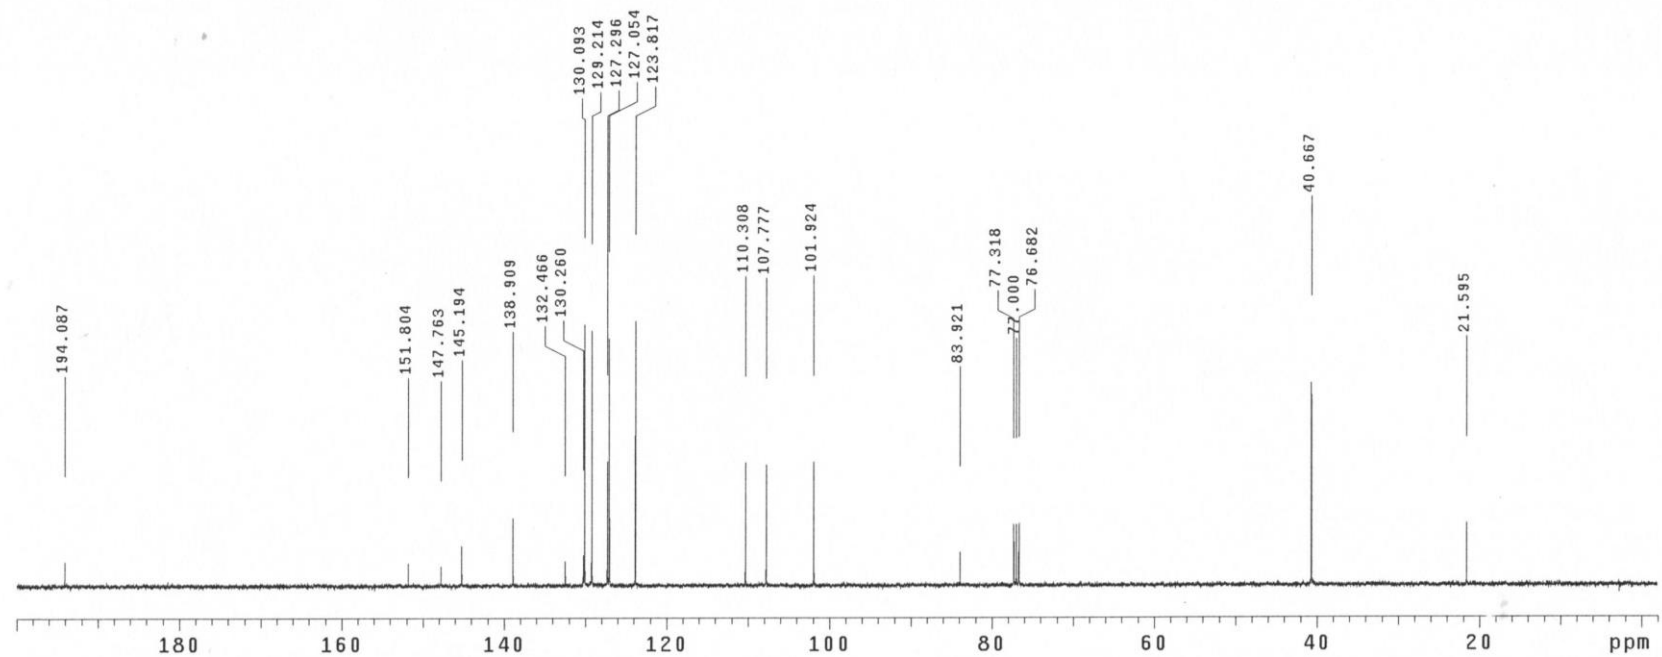

# Compound 7u (<sup>1</sup>H-NMR spectral data)

NC0714-5

Pulse Sequence: s2pu1  
UNITYplus-400 "unity400"  
Date: Jul 16 2020  
Solvent: CDCl<sub>3</sub>  
Ambient temperature  
Total 32 repetitions

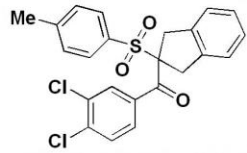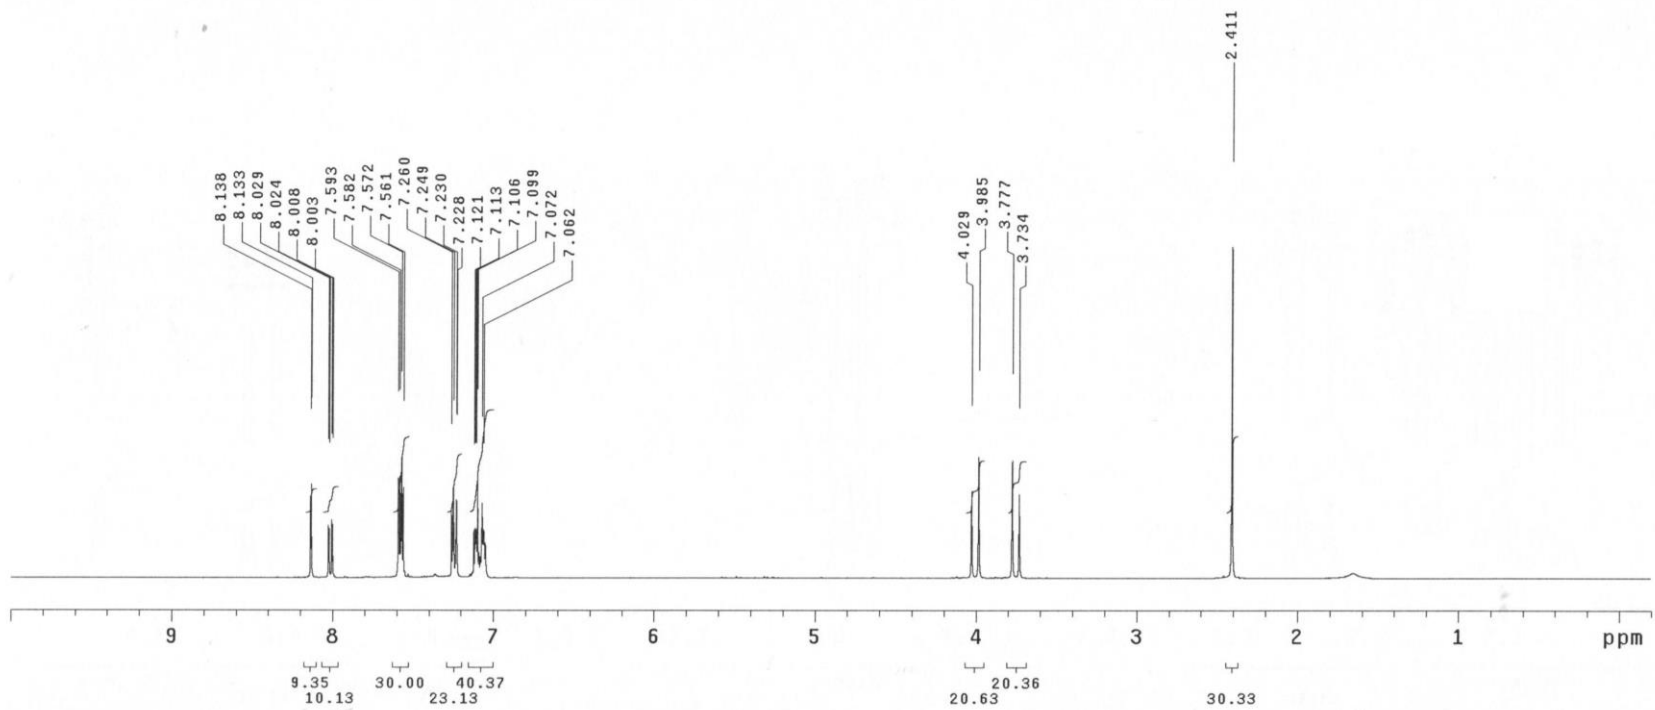

# Compound 7u (<sup>13</sup>C-NMR spectral data)

NC0714-5

Pulse Sequence: s2pu1

UNITYplus-400 "unity400"

Date: Jul 16 2020

Solvent: CDCl<sub>3</sub>

Ambient temperature

Total 1360 repetitions

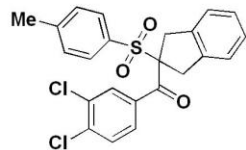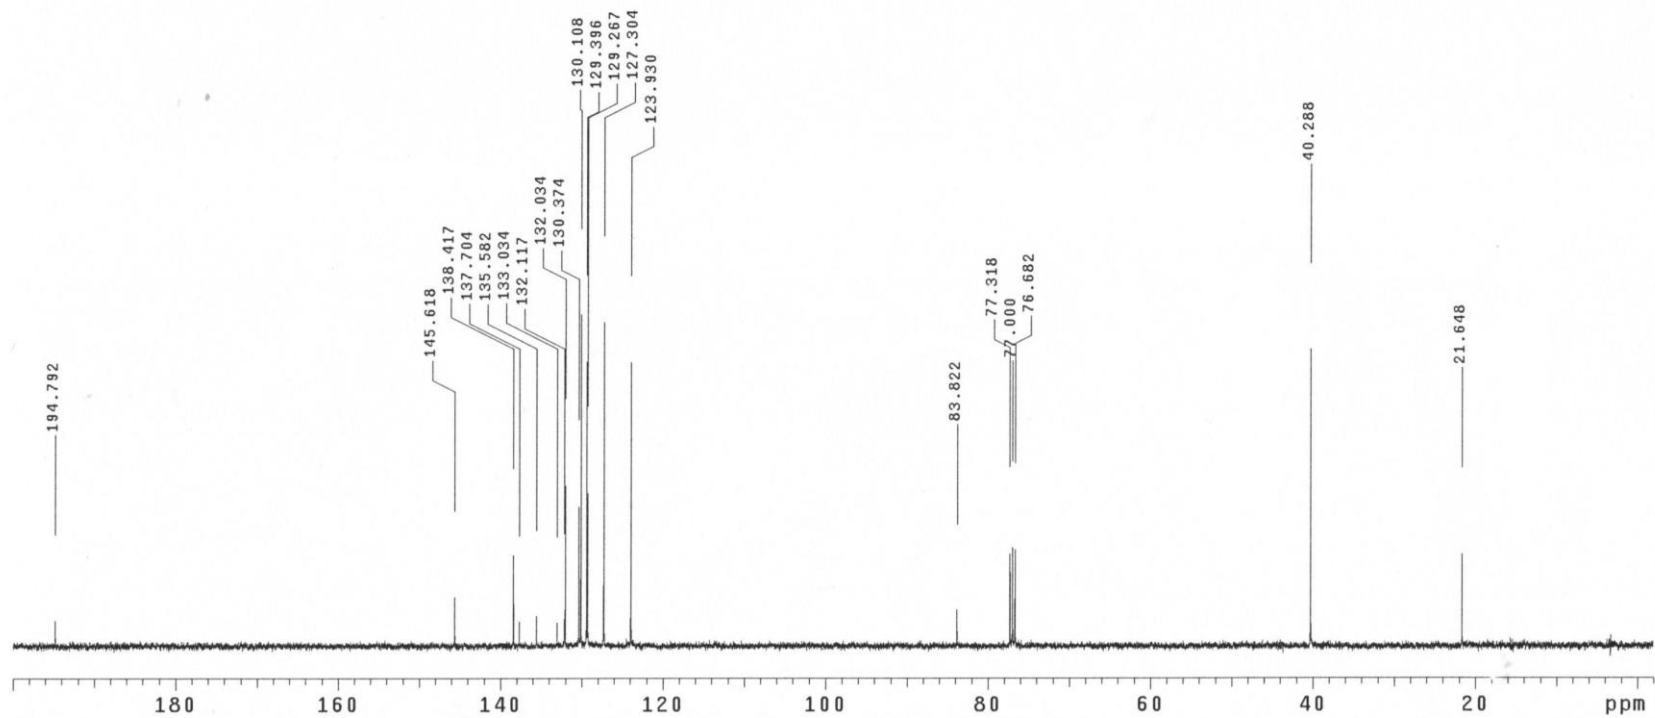

# Compound 7v (<sup>1</sup>H-NMR spectral data)

NC0730-5

Pulse Sequence: s2pu1

UNITYplus-400 "unity400"

Date: Aug 3 2020

Solvent: CDCl<sub>3</sub>

Ambient temperature

Total 32 repetitions

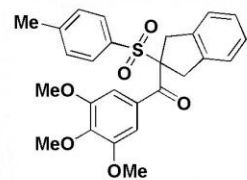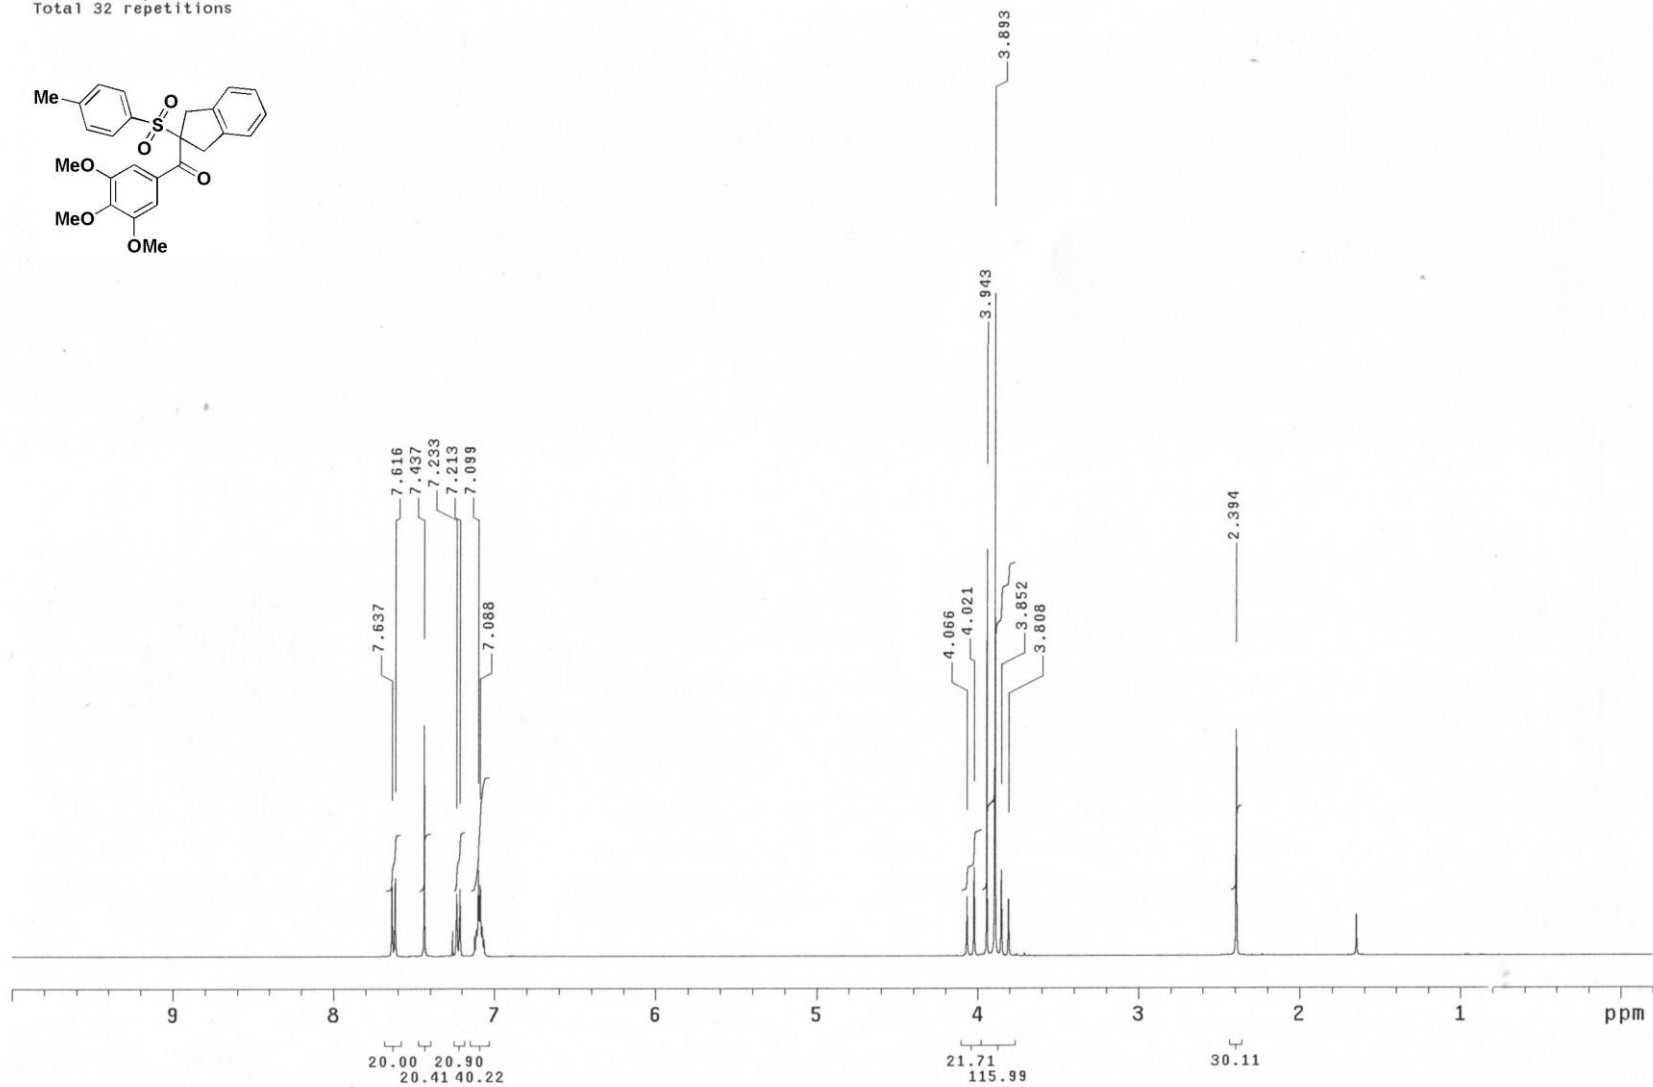

# Compound 7v (<sup>13</sup>C-NMR spectral data)

NC0730-5

Pulse Sequence: s2pu1

UNITYplus-400 "unity400"

Date: Aug 3 2020

Solvent: CDCl<sub>3</sub>

Ambient temperature

Total 1152 repetitions

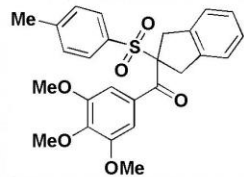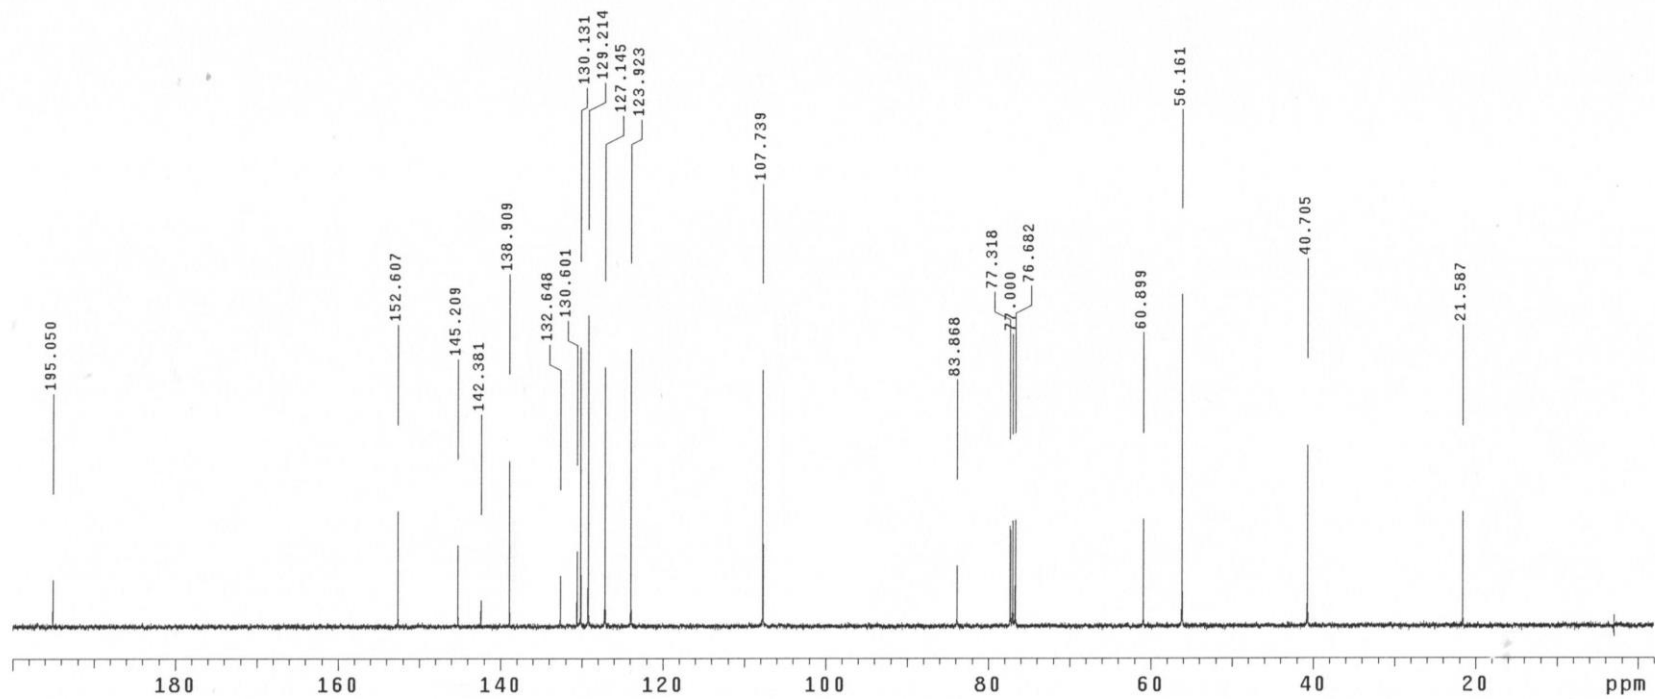

# Compound 7w (<sup>1</sup>H-NMR spectral data)

NC0804-5

Pulse Sequence: s2pu1

UNITYplus-400 "unity400"

Date: Aug 5 2020

Solvent: CDCl<sub>3</sub>

Ambient temperature

Total 32 repetitions

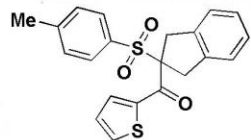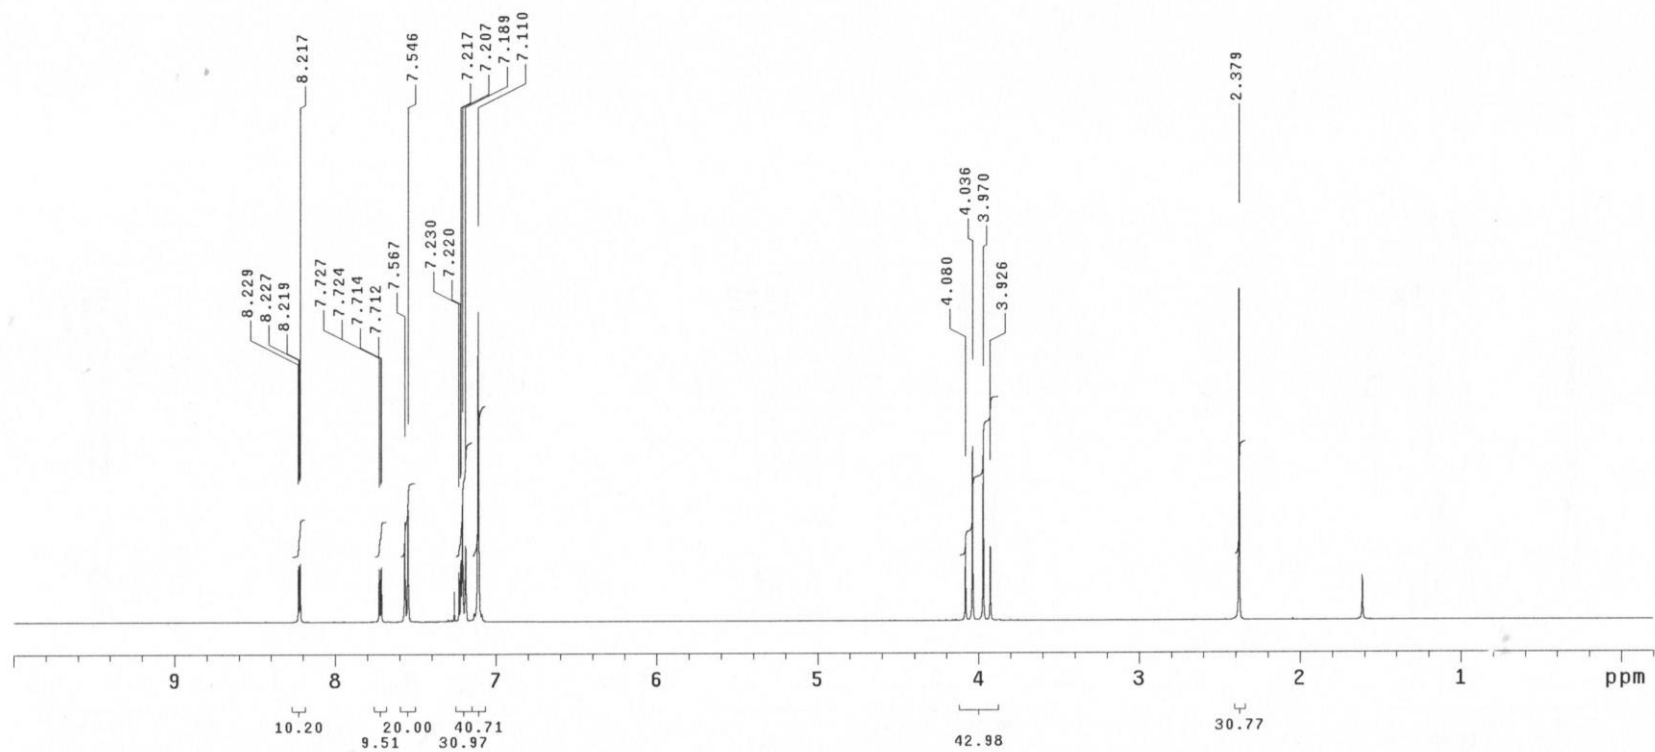

# Compound 7w (<sup>13</sup>C-NMR spectral data)

NC0804-5

Pulse Sequence: s2pu1

UNITYplus-400 "unity400"

Date: Aug 5 2020

Solvent: CDCl<sub>3</sub>

Ambient temperature

Total 672 repetitions

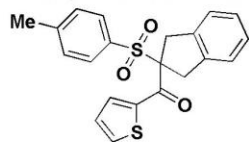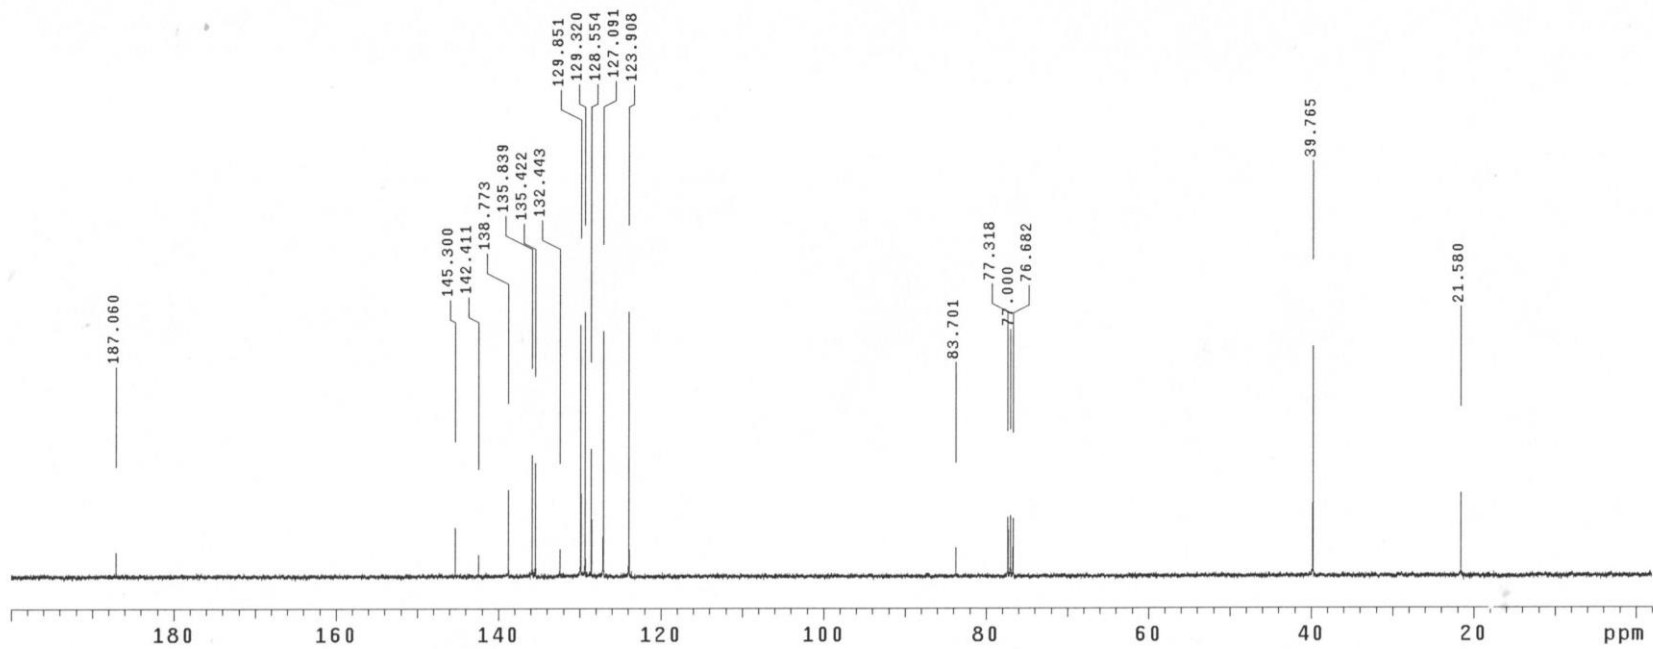

# Compound 7x (<sup>1</sup>H-NMR spectral data)

NC0805-5

Pulse Sequence: s2pu1

UNITYplus-400 "unity400"

Date: Aug 6 2020

Solvent: CDCl<sub>3</sub>

Ambient temperature

Total 32 repetitions

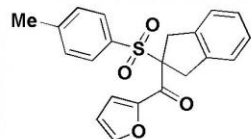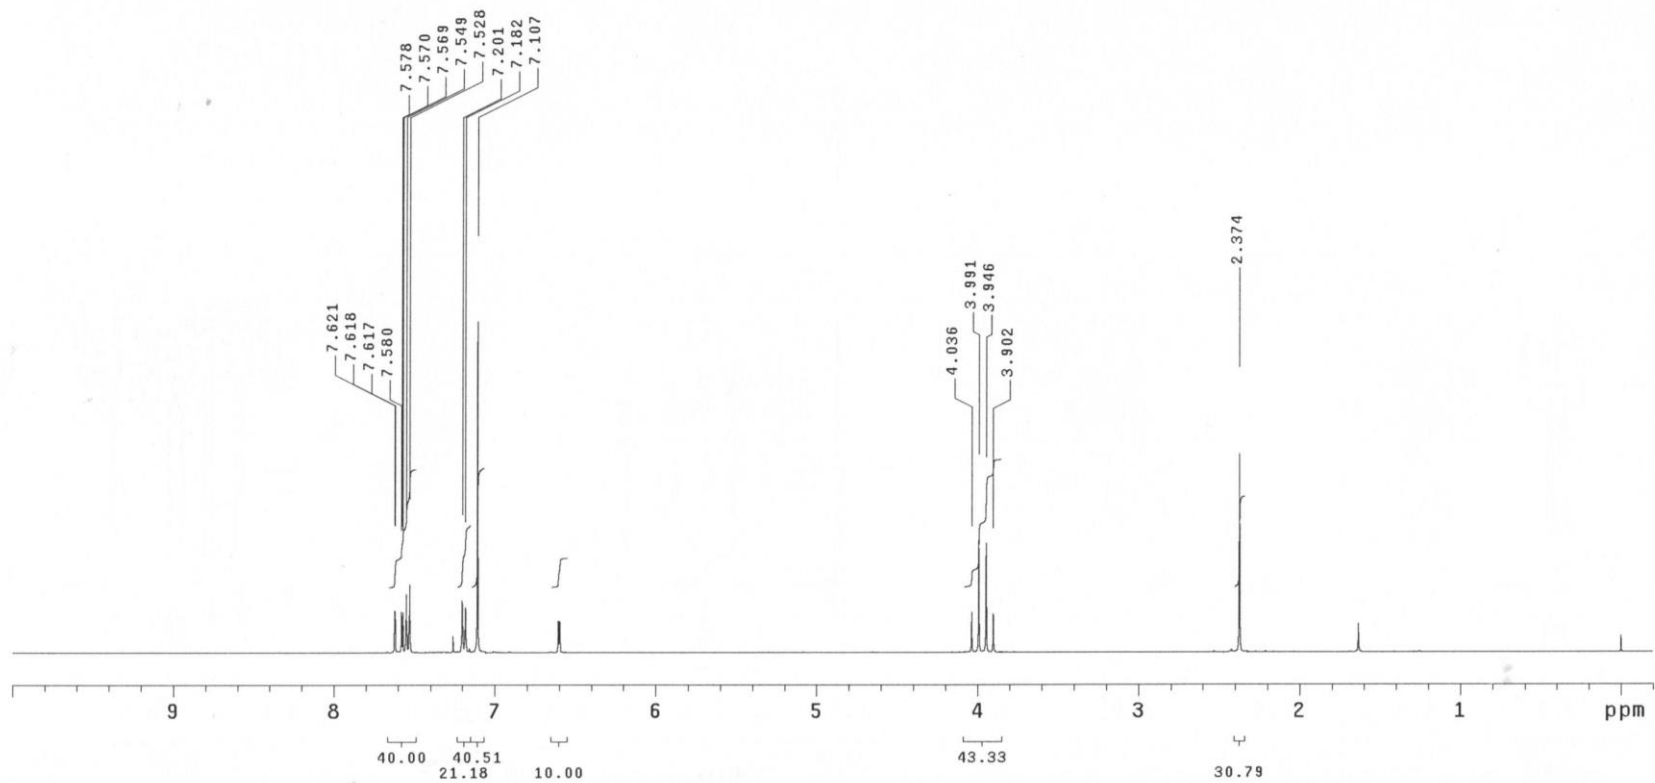



# Compound 7x (<sup>13</sup>C-NMR spectral data)

NC0805-5

Pulse Sequence: s2pu1

UNITYplus-400 "unity400"

Date: Aug 6 2020

Solvent: CDCl<sub>3</sub>

Ambient temperature

Total 720 repetitions

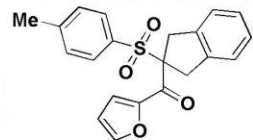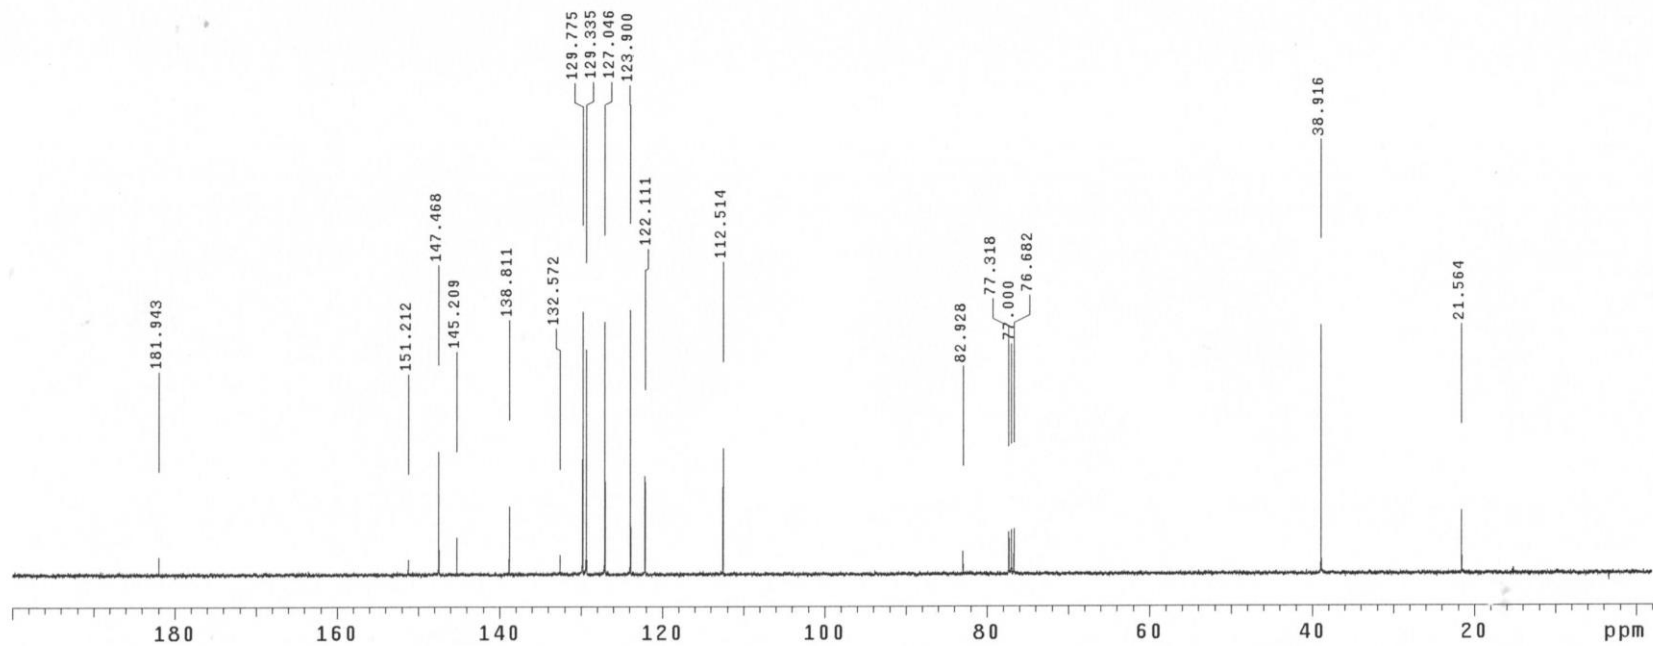

# Compound 7y (<sup>1</sup>H-NMR spectral data)

NC0820-5

Pulse Sequence: s2pu1

UNITYplus-400 "unity400"

Date: Aug 24 2020

Solvent: CDCl<sub>3</sub>

Ambient temperature

Total 32 repetitions

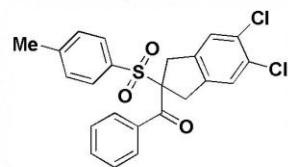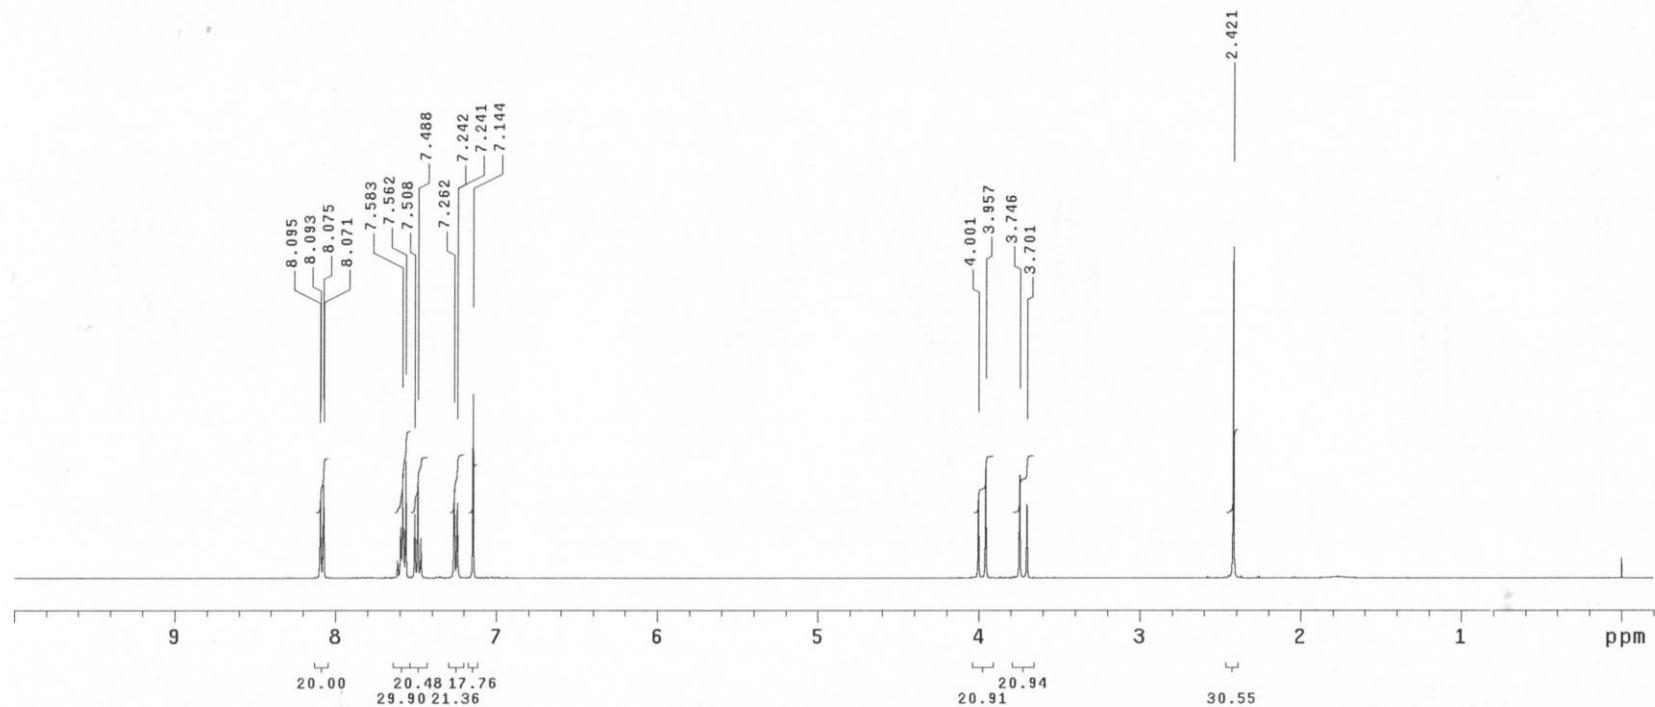

# Compound 7y (<sup>13</sup>C-NMR spectral data)

NC0820-5

Pulse Sequence: s2pu1  
UNITYplus-400 "unity400"  
Date: Aug 24 2020  
Solvent: CDCl<sub>3</sub>  
Ambient temperature  
Total 400 repetitions

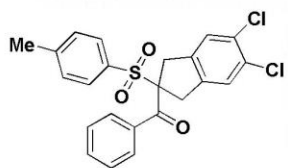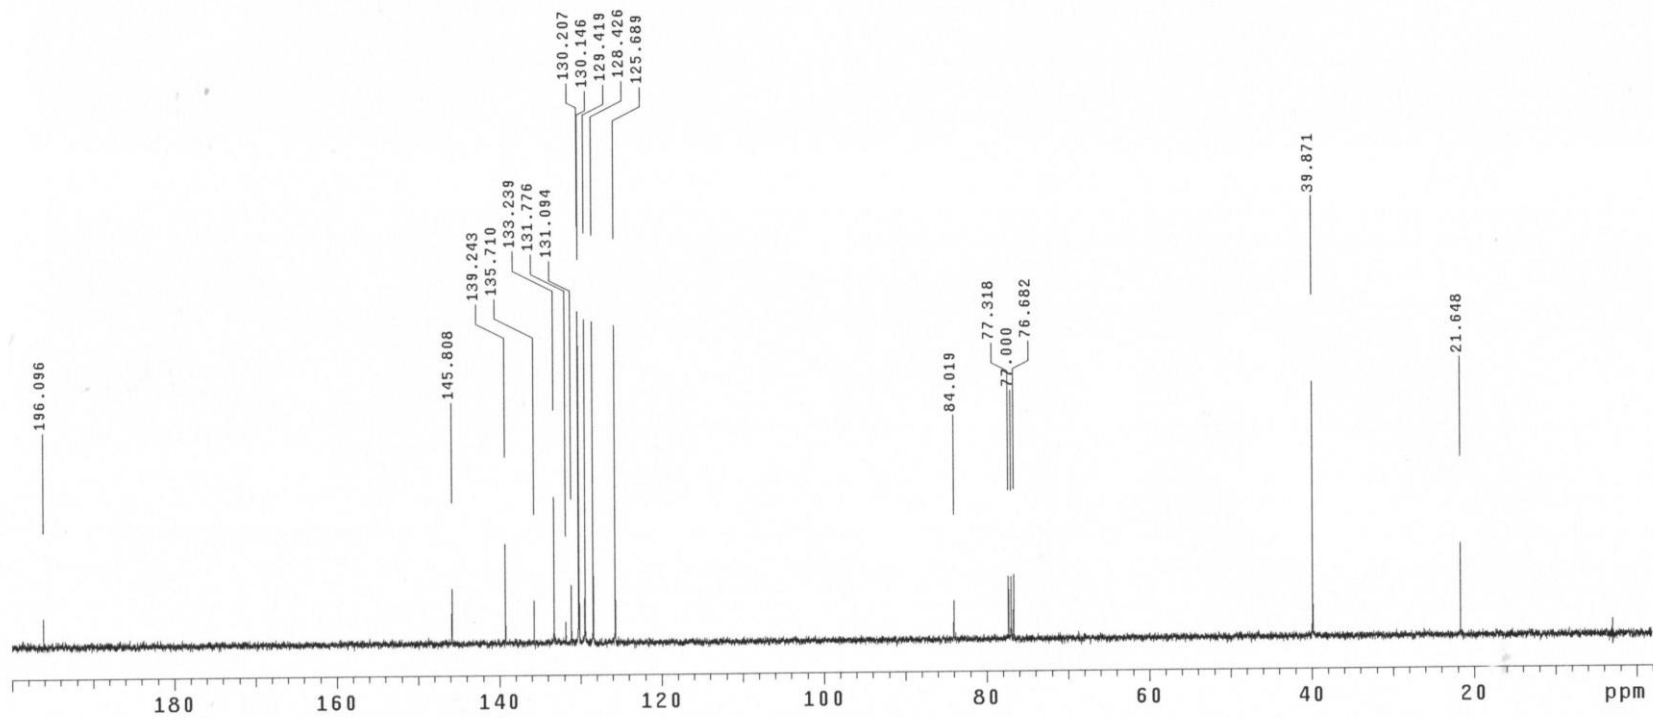

# Compound 7z (<sup>1</sup>H-NMR spectral data)

NC0810-5

Pulse Sequence: s2pu1

UNITYplus-400 "unity400"

Date: Aug 12 2020

Solvent: CDC13

Ambient temperature

Total 32 repetitions

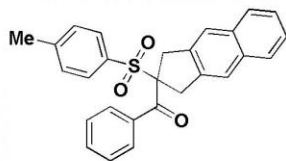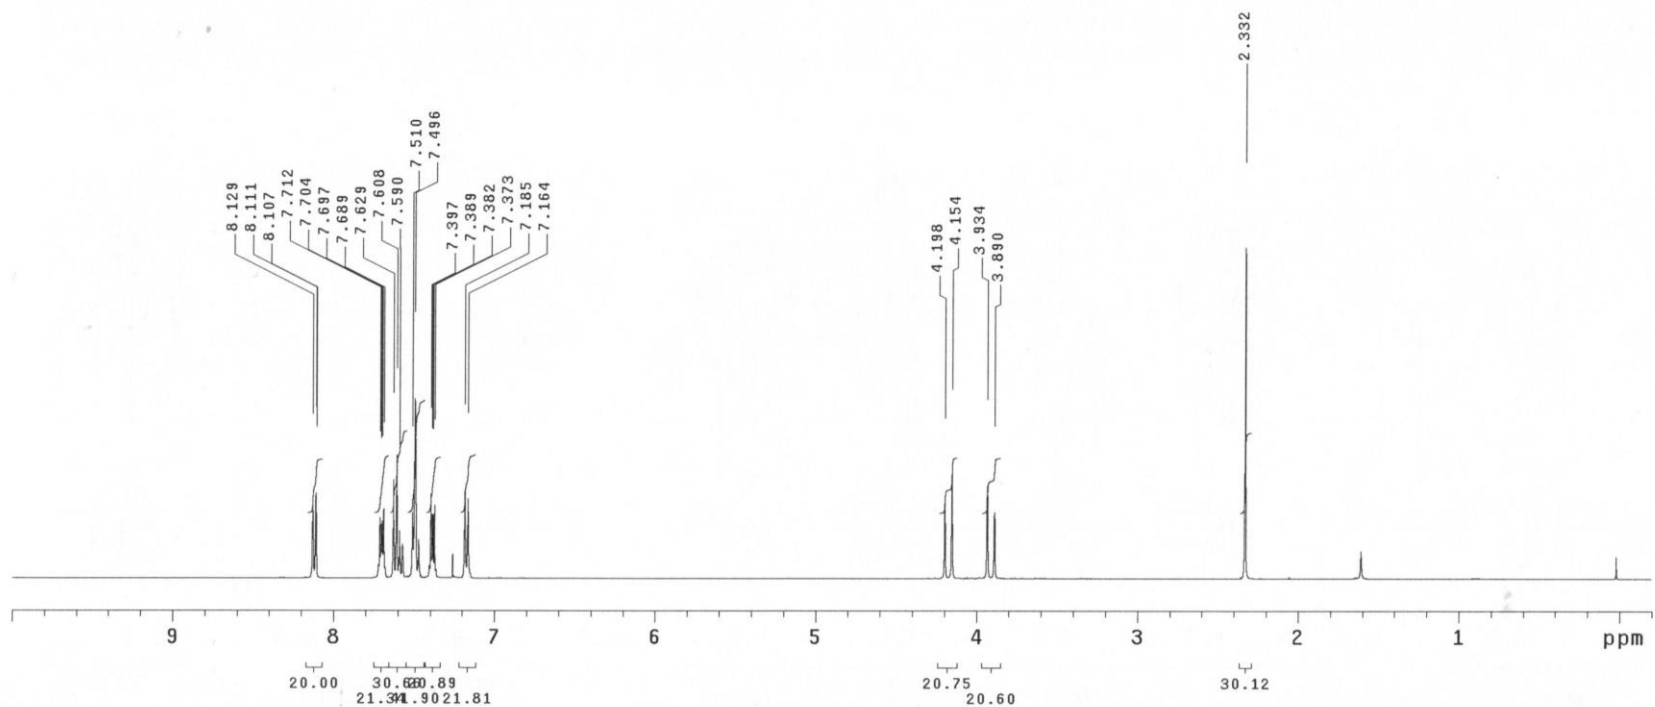

# Compound 7z (<sup>13</sup>C-NMR spectral data)

NC0810-5

Pulse Sequence: s2pu1

UNITYplus-400 "unity400"

Date: Aug 12 2020

Solvent: CDCl<sub>3</sub>

Ambient temperature

Total 672 repetitions

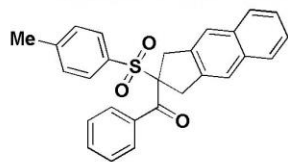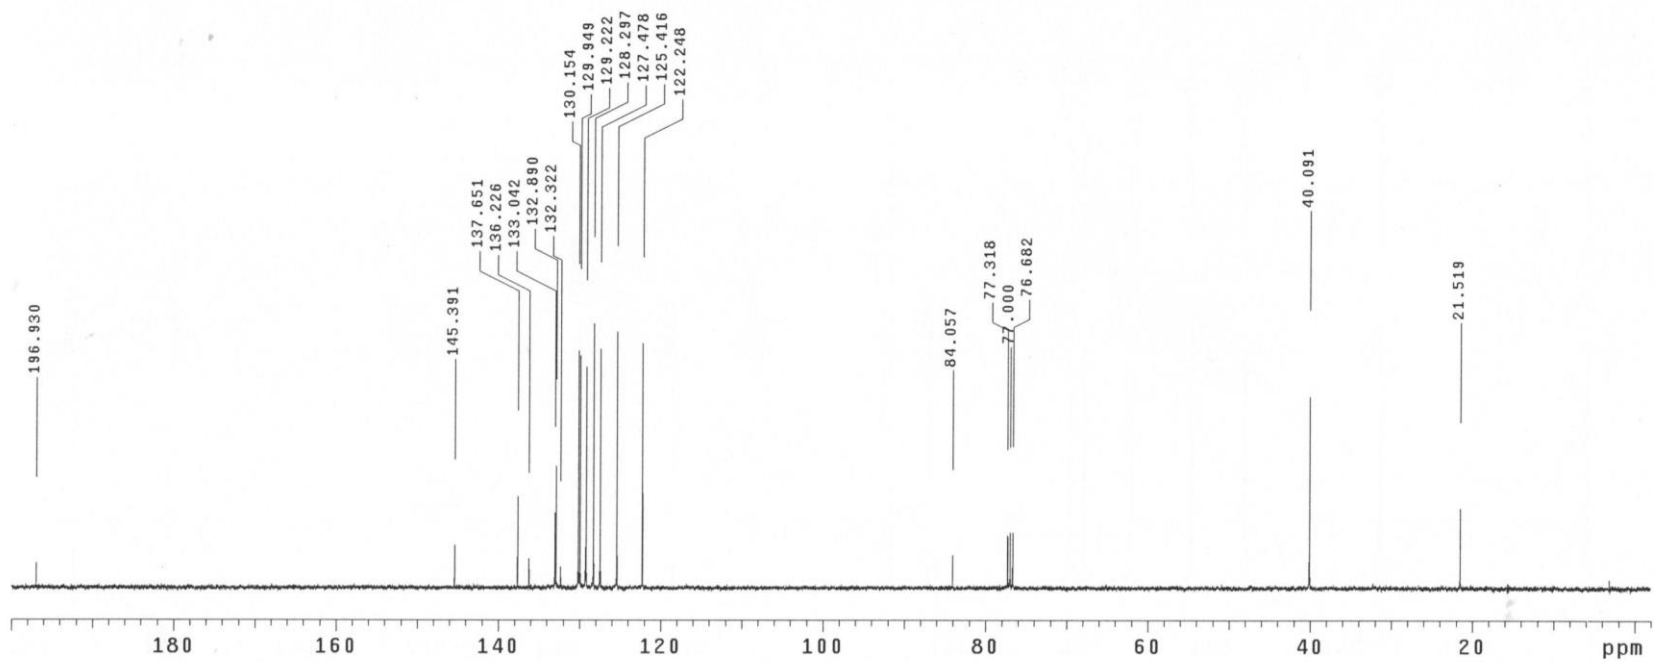

# Compound 7aa (<sup>1</sup>H-NMR spectral data)

NC0821-5

Pulse Sequence: s2pu1

UNITYplus-400 "unity400"

Date: Aug 24 2020

Solvent: CDCl<sub>3</sub>

Ambient temperature

Total 32 repetitions

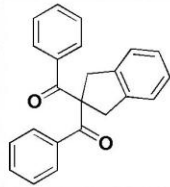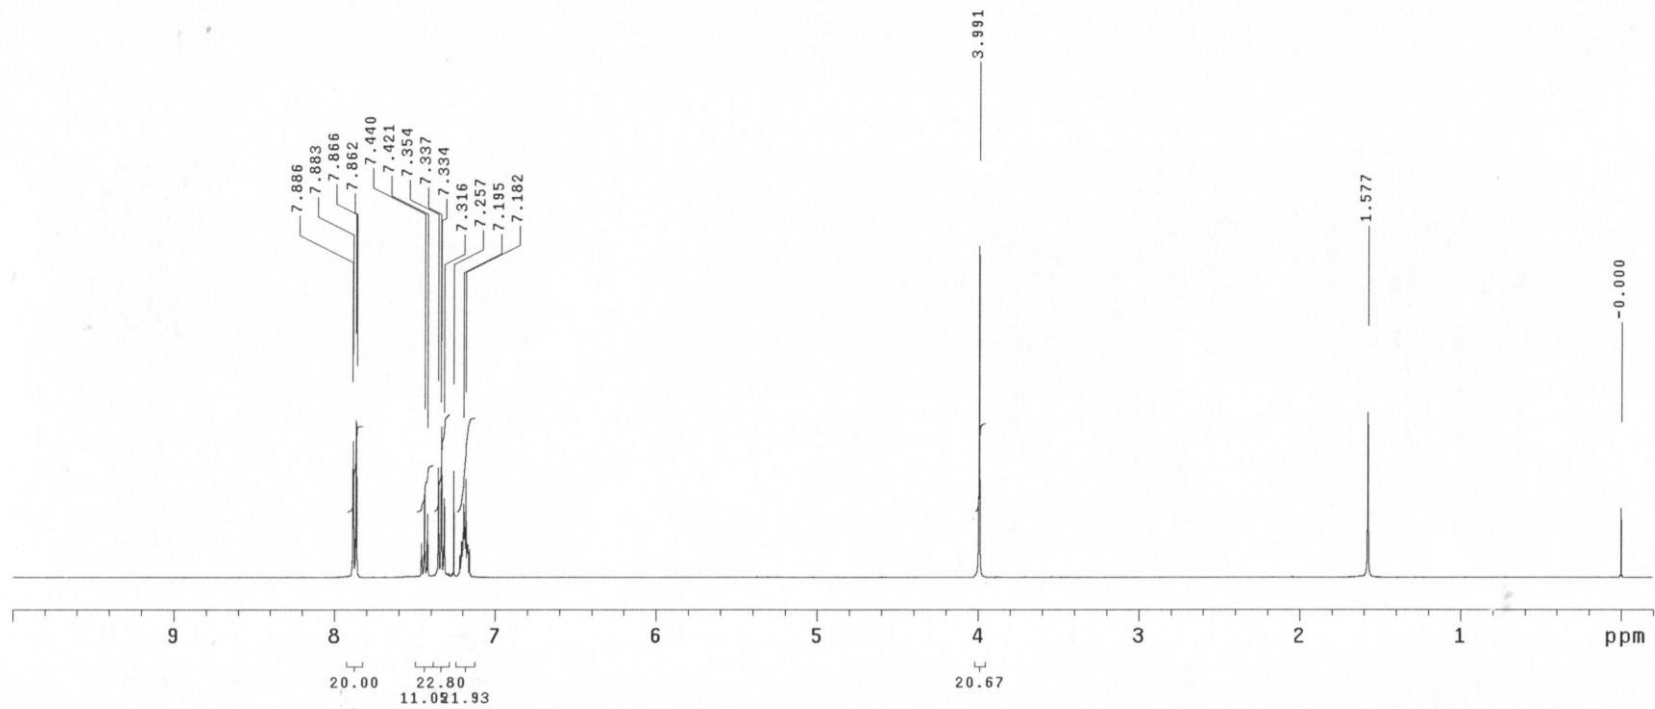

# Compound 7aa (<sup>13</sup>C-NMR spectral data)

NC0821-5

Pulse Sequence: s2pu1  
UNITYplus-400 "unity400"  
Date: Aug 24 2020  
Solvent: CDCl<sub>3</sub>  
Ambient temperature  
Total 1472 repetitions

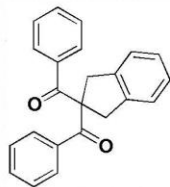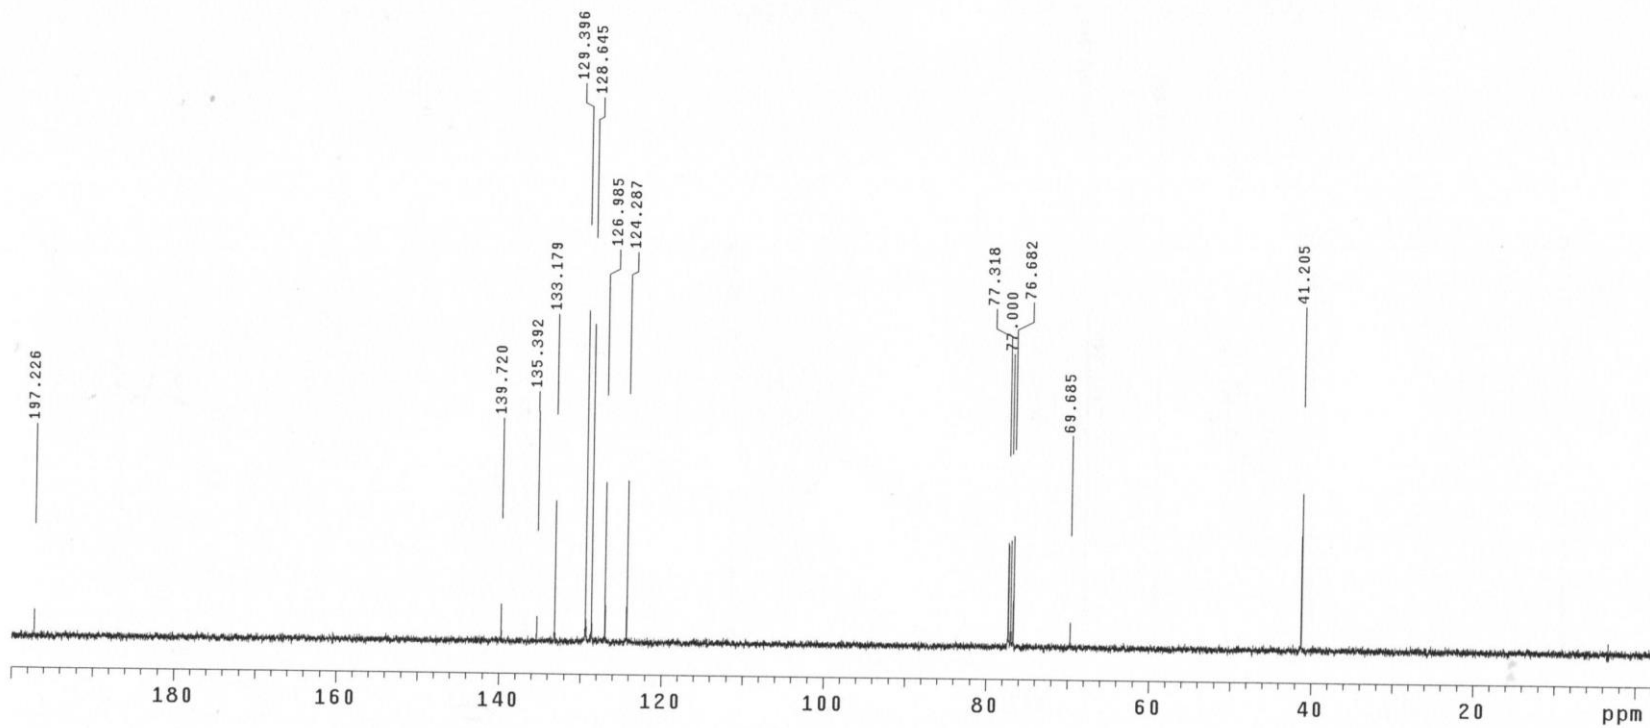

# Compound 7ab (<sup>1</sup>H-NMR spectral data)

NC0824-5

Pulse Sequence: s2pu1

UNITYplus-400 "unity400"

Date: Aug 27 2020

Solvent: CDCl<sub>3</sub>

Ambient temperature

Total 32 repetitions

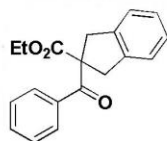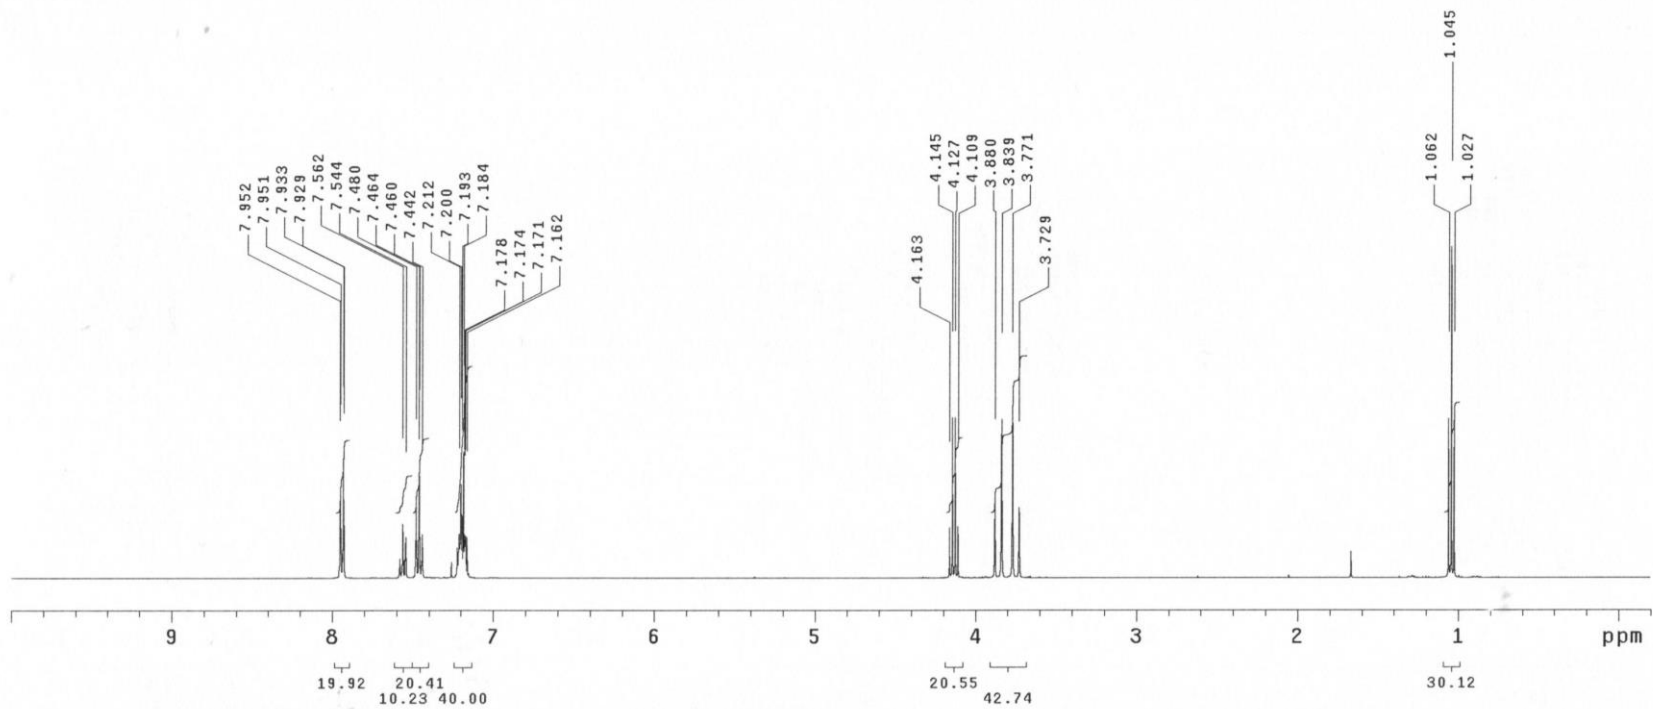



# Compound 7ab (<sup>13</sup>C-NMR spectral data)

NC0824-5

Pulse Sequence: s2pu1

UNITYplus-400 "unity400"

Date: Aug 27 2020

Solvent: CDCl<sub>3</sub>

Ambient temperature

Total 400 repetitions

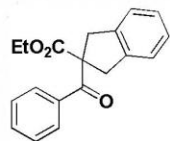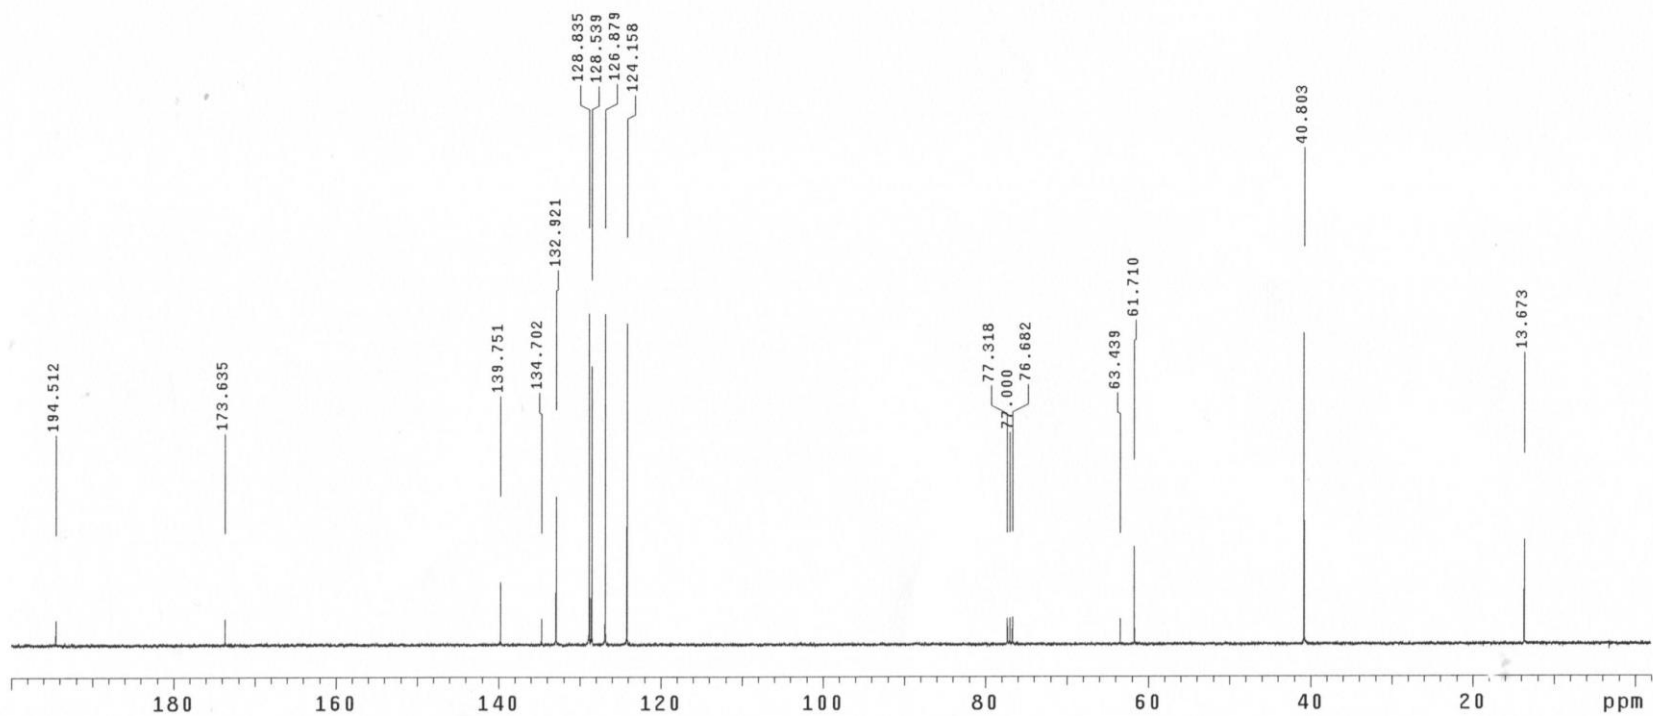

# Compound 7ac (<sup>1</sup>H-NMR spectral data)

NC0831-5

Pulse Sequence: s2pu1

UNITYplus-400 "unity400"

Date: Sep 1 2020

Solvent: CDCl<sub>3</sub>

Ambient temperature

Total 32 repetitions

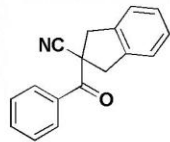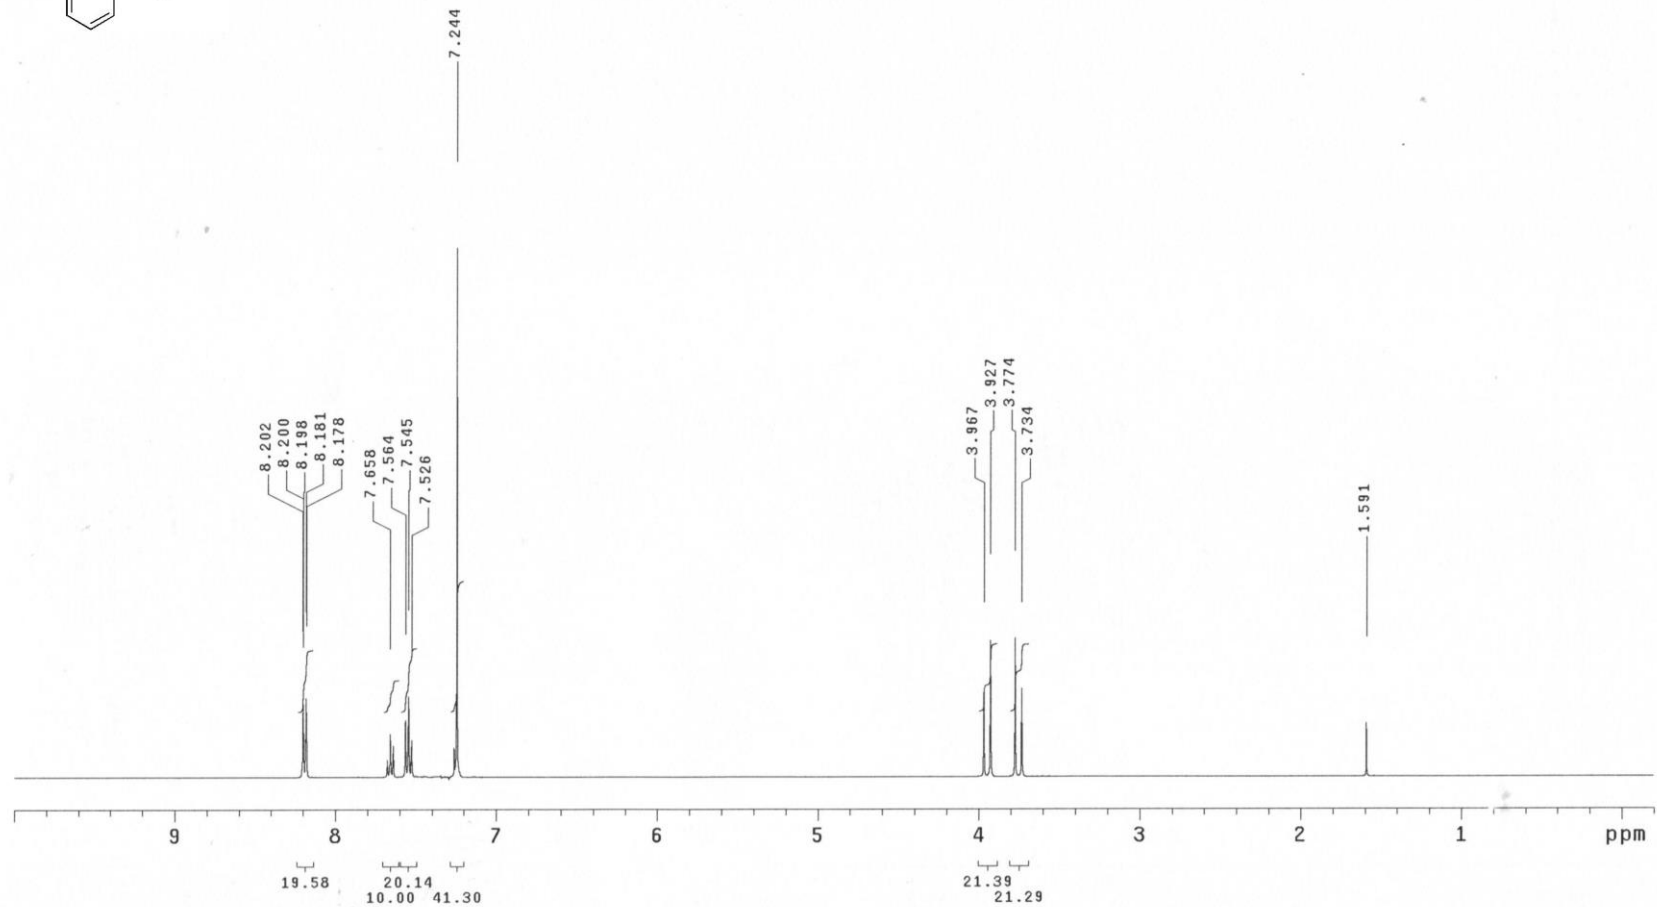

# Compound 7ac (<sup>13</sup>C-NMR spectral data)

NC0831-5

Pulse Sequence: s2pu1

UNITYplus-400 "unity400"

Date: Sep 1 2020

Solvent: CDCl<sub>3</sub>

Ambient temperature

Total 816 repetitions

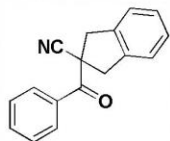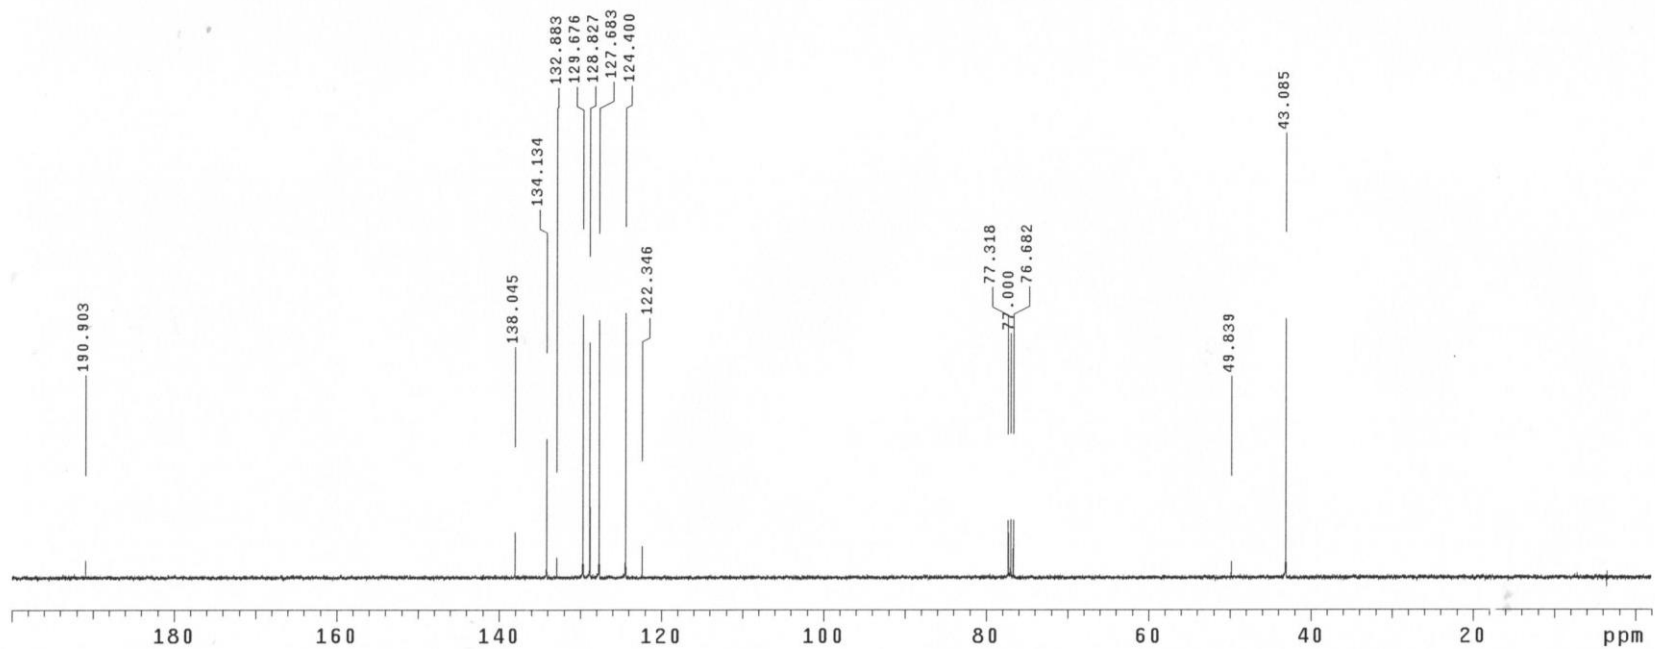

# Compound 7ad (<sup>1</sup>H-NMR spectral data)

NC0903-5

Pulse Sequence: s2pu1

UNITYplus-400 "unity400"

Date: Sep 7 2020

Solvent: CDCl<sub>3</sub>

Ambient temperature

Total 32 repetitions

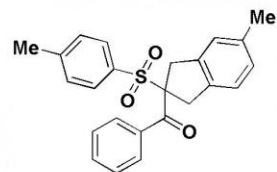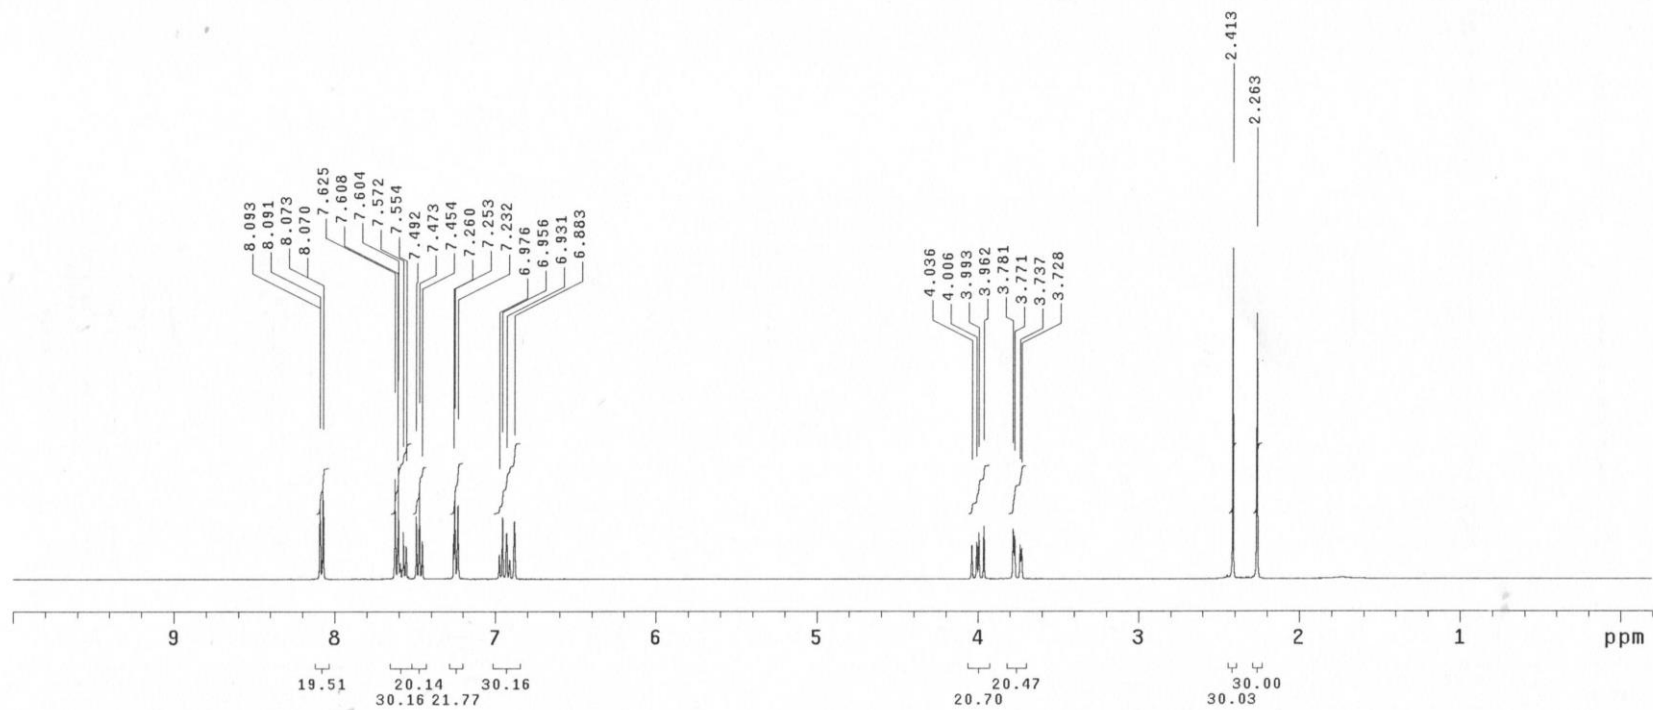

# Compound 7ad (<sup>13</sup>C-NMR spectral data)

NC0903-5

Pulse Sequence: s2pu1

UNITYplus-400 "unity400"

Date: Sep 7 2020

Solvent: CDCl<sub>3</sub>

Ambient temperature

Total 832 repetitions

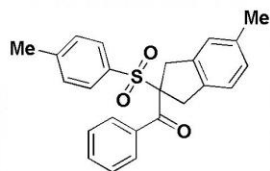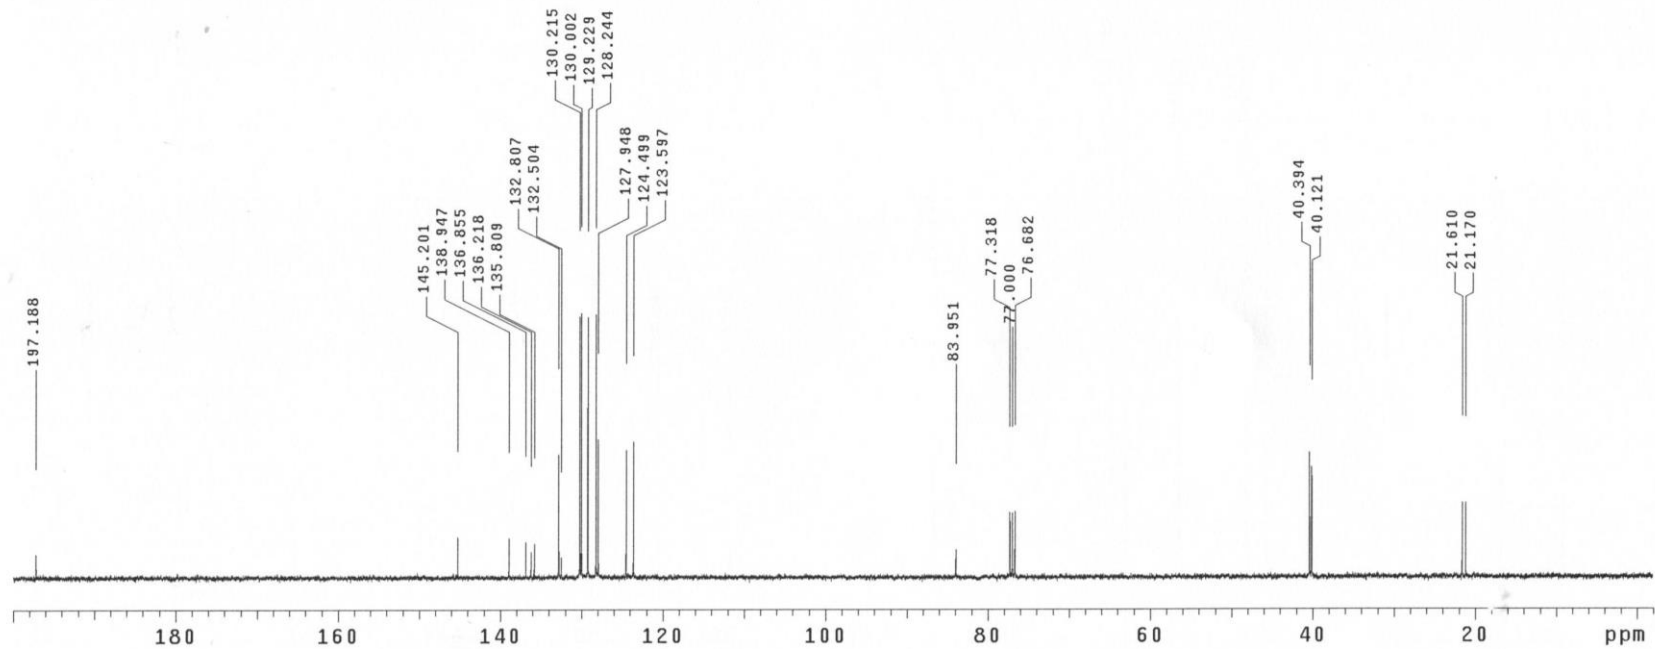

# Compound 8a (<sup>1</sup>H-NMR spectral data)

KT5557

Pulse Sequence: s2pu1

UNITYplus-400 "unity400"

Date: Apr 22 2020

Solvent: CDCl<sub>3</sub>

Ambient temperature

Total 32 repetitions

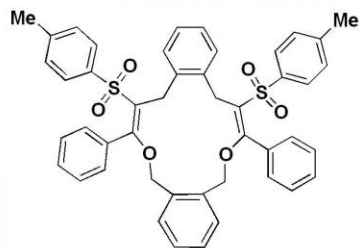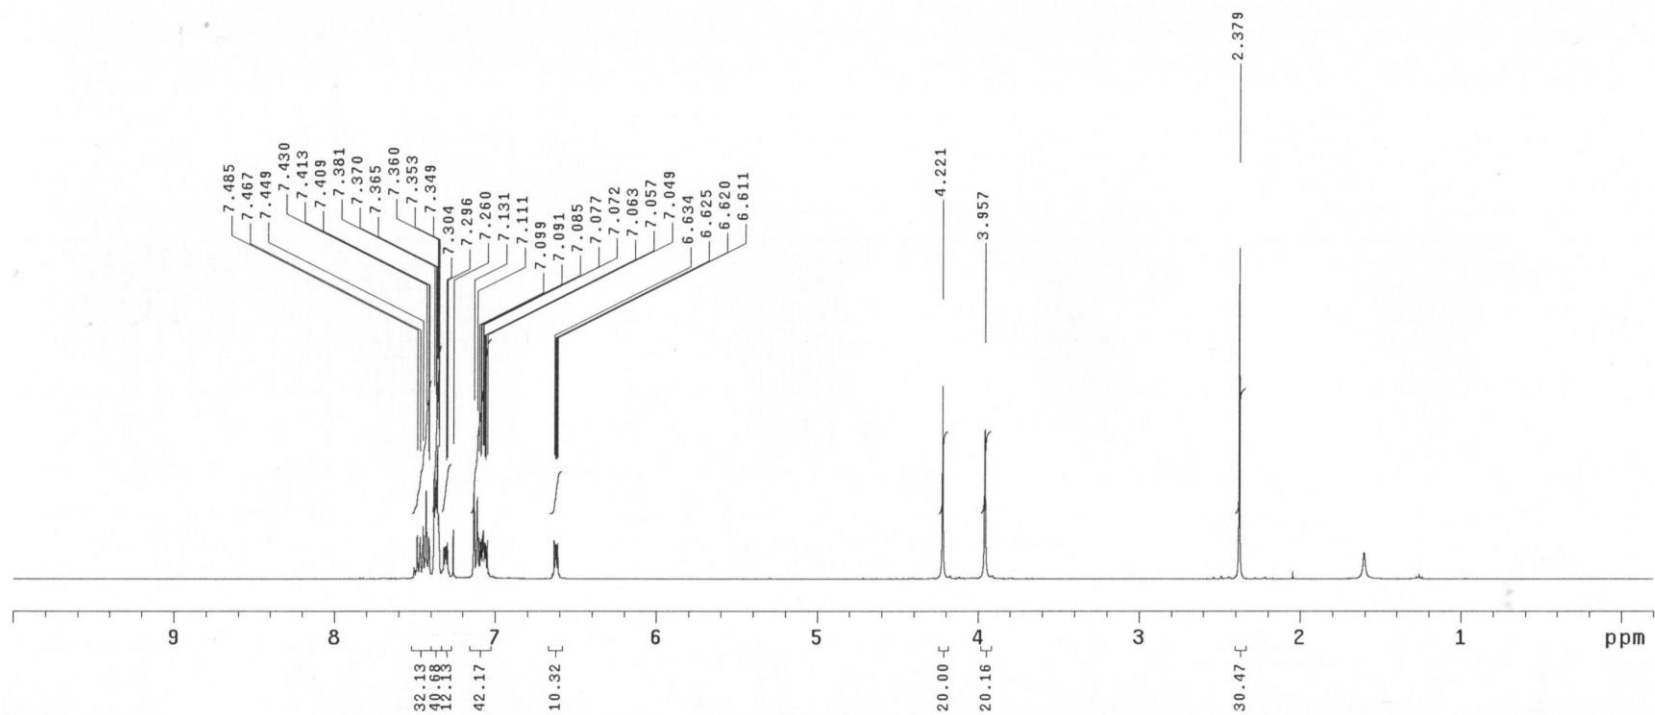

# Compound 8a (<sup>13</sup>C-NMR spectral data)

KT5557

Pulse Sequence: s2pu1

UNITYplus-400 "unity400"

Date: Apr 22 2020

Solvent: CDCl<sub>3</sub>

Ambient temperature

Total 640 repetitions

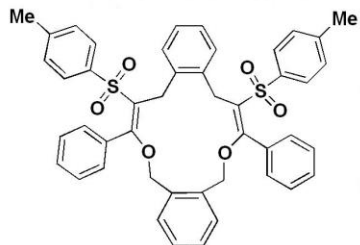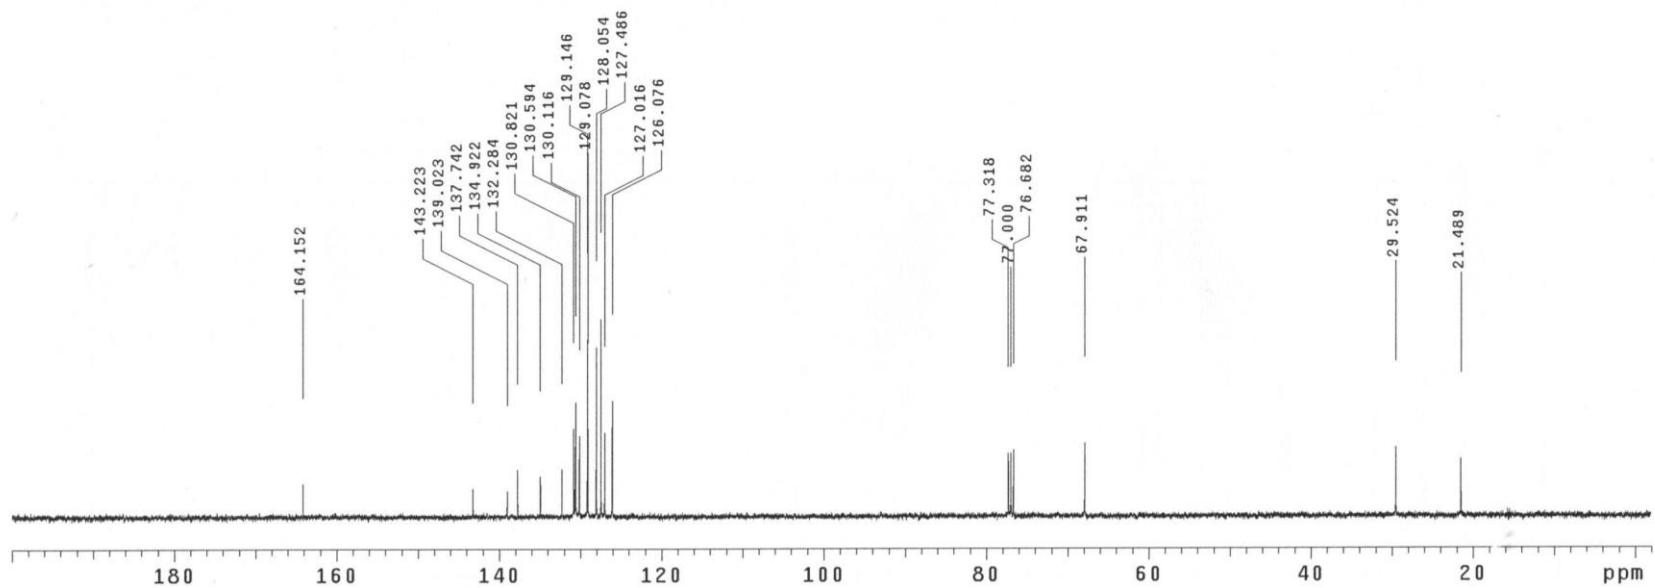

# Compound 8b (<sup>1</sup>H-NMR spectral data)

NC0624-14

Pulse Sequence: s2pu1

Solvent: CDC13

Ambient temperature

UNITYplus-400 "unity400"

Pulse 38.8 degrees

Acq. time 3.744 sec

Width 6000.6 Hz

32 repetitions

OBSERVE H1, 400.2743814 MHz

DATA PROCESSING

FT size 65536

Total time 2 min, 0 sec

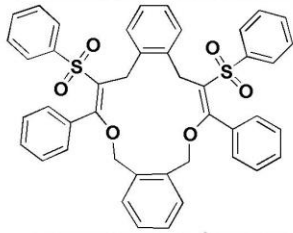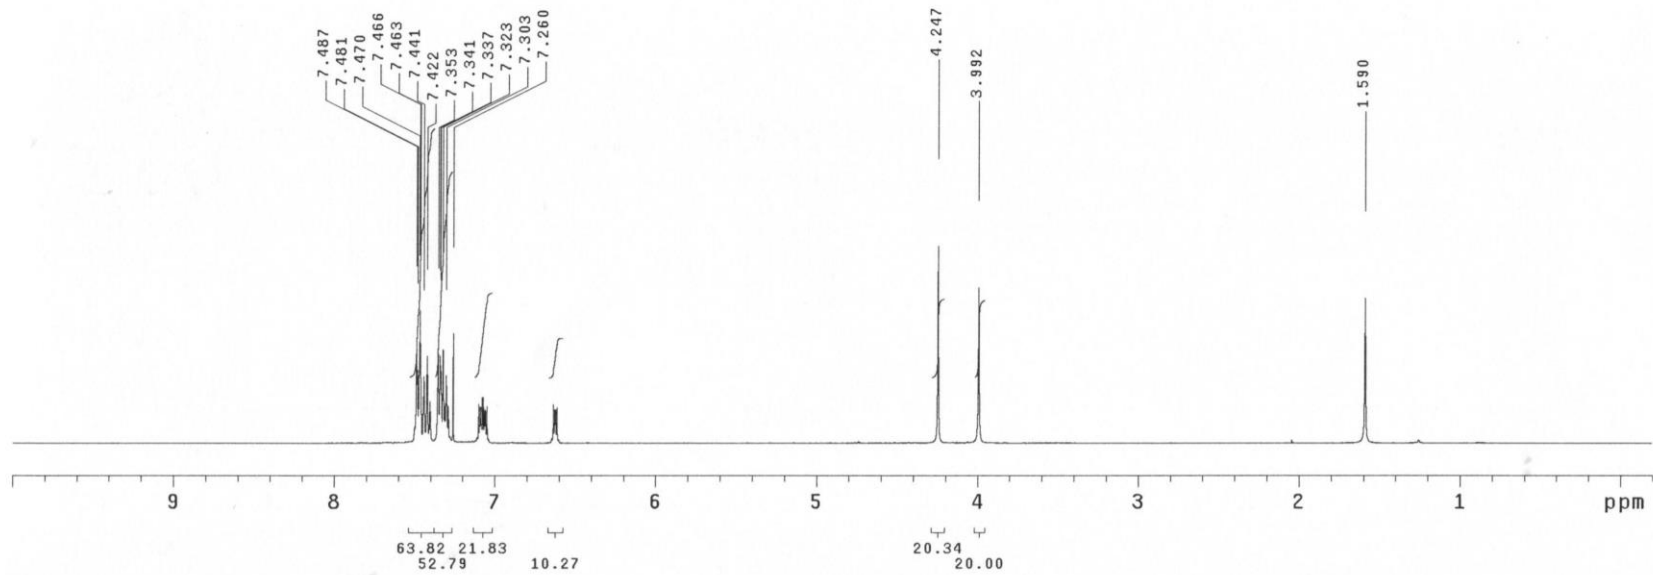



# Compound 8b (<sup>13</sup>C-NMR spectral data)

NC0624-14

Pulse Sequence: s2pu1

Solvent: CDC13

Ambient temperature

UNITYplus-400 "unity400"

Relax. delay 0.500 sec

Pulse 65.8 degrees

Acq. time 0.800 sec

Width 25000.0 Hz

3200 repetitions

OBSERVE C13, 100.6490738 MHz

DECOUPLE H1, 400.2763980 MHz

Power 43 dB

on during acquisition

off during delay

WALTZ-16 modulated

DATA PROCESSING

Line broadening 1.0 Hz

FT size 65536

Total time 11 hr, 39 min, 7 sec

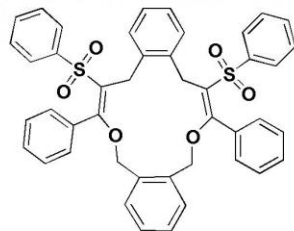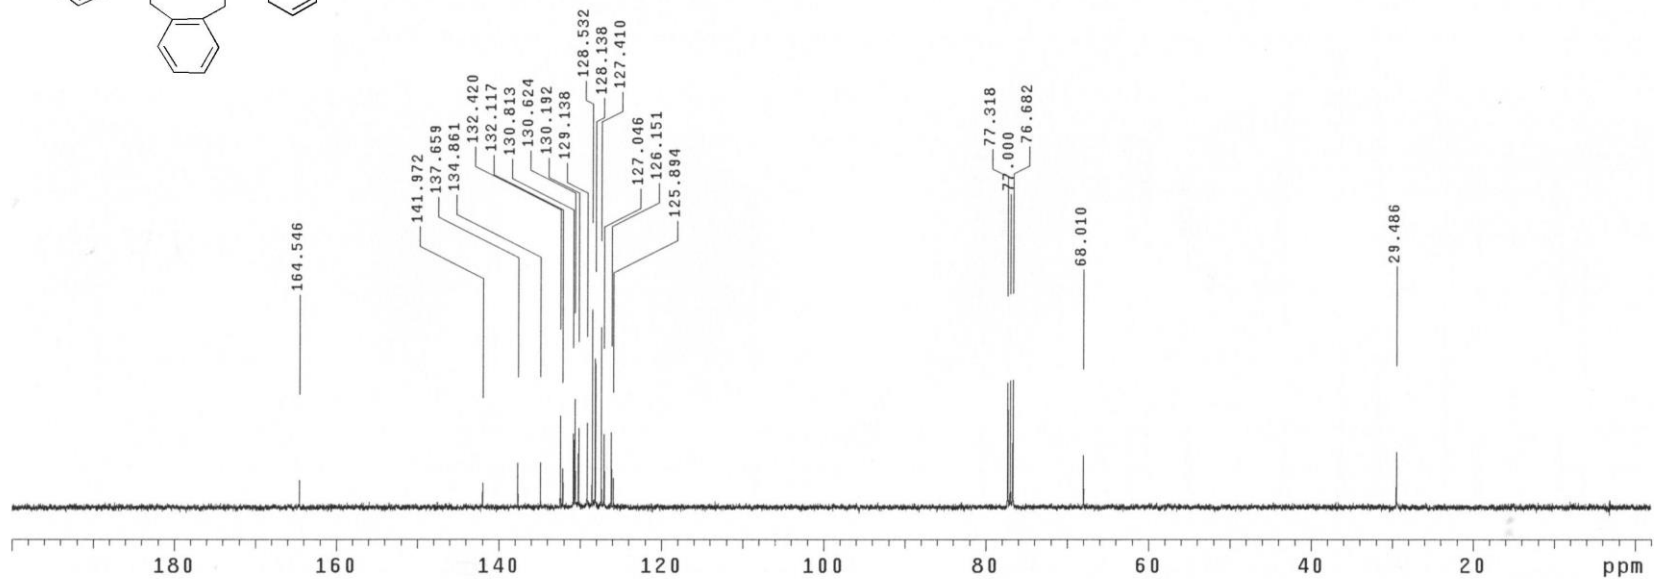

# Compound 8c (<sup>1</sup>H-NMR spectral data)

NC0629-14

Pulse Sequence: s2pu1  
Solvent: CDCl3  
Ambient temperature  
UNITYplus-400 "unity400"

Pulse 38.8 degrees  
Acq. time 3.744 sec  
Width 6000.6 Hz  
64 repetitions  
OBSERVE H1, 400.2743814 MHz  
DATA PROCESSING  
FT size 65536  
Total time 4 min, 0 sec

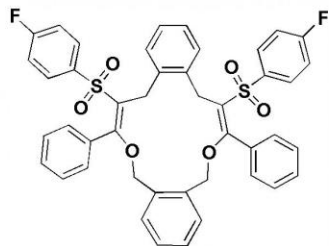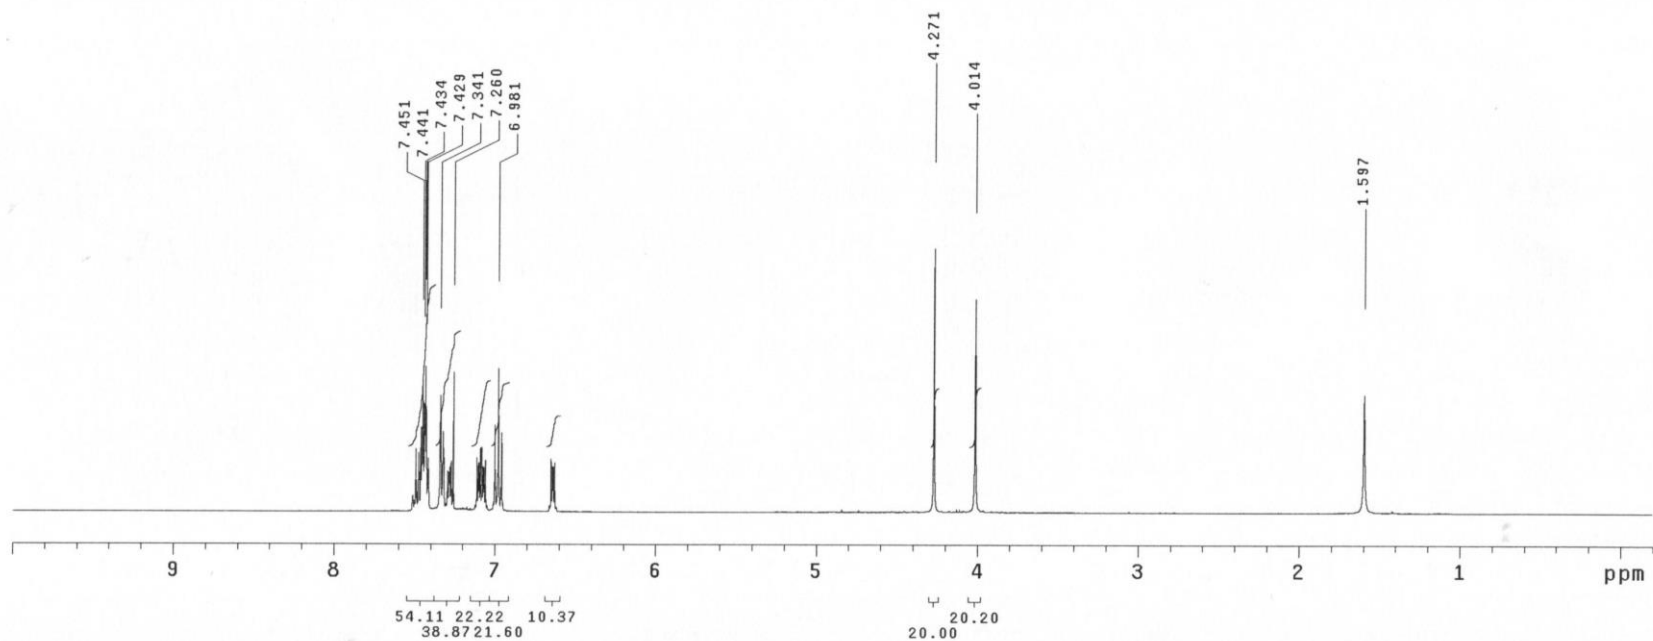

# Compound 8c (<sup>13</sup>C-NMR spectral data)

NC0629-14

Pulse Sequence: s2pu1

Solvent: CDCl<sub>3</sub>

Ambient temperature

UNITYplus-400 "unity400"

Relax. delay 0.500 sec

Pulse 65.8 degrees

Acq. time 0.800 sec

Width 25000.0 Hz

2624 repetitions

OBSERVE C13, 100.6490738 MHz

DECOUPLE H1, 400.2763980 MHz

Power 43 dB

on during acquisition

off during delay

WALTZ-16 modulated

DATA PROCESSING

Line broadening 1.0 Hz

FT size 65536

Total time 11 hr, 39 min, 7 sec

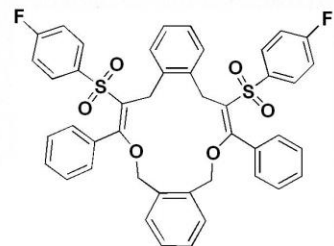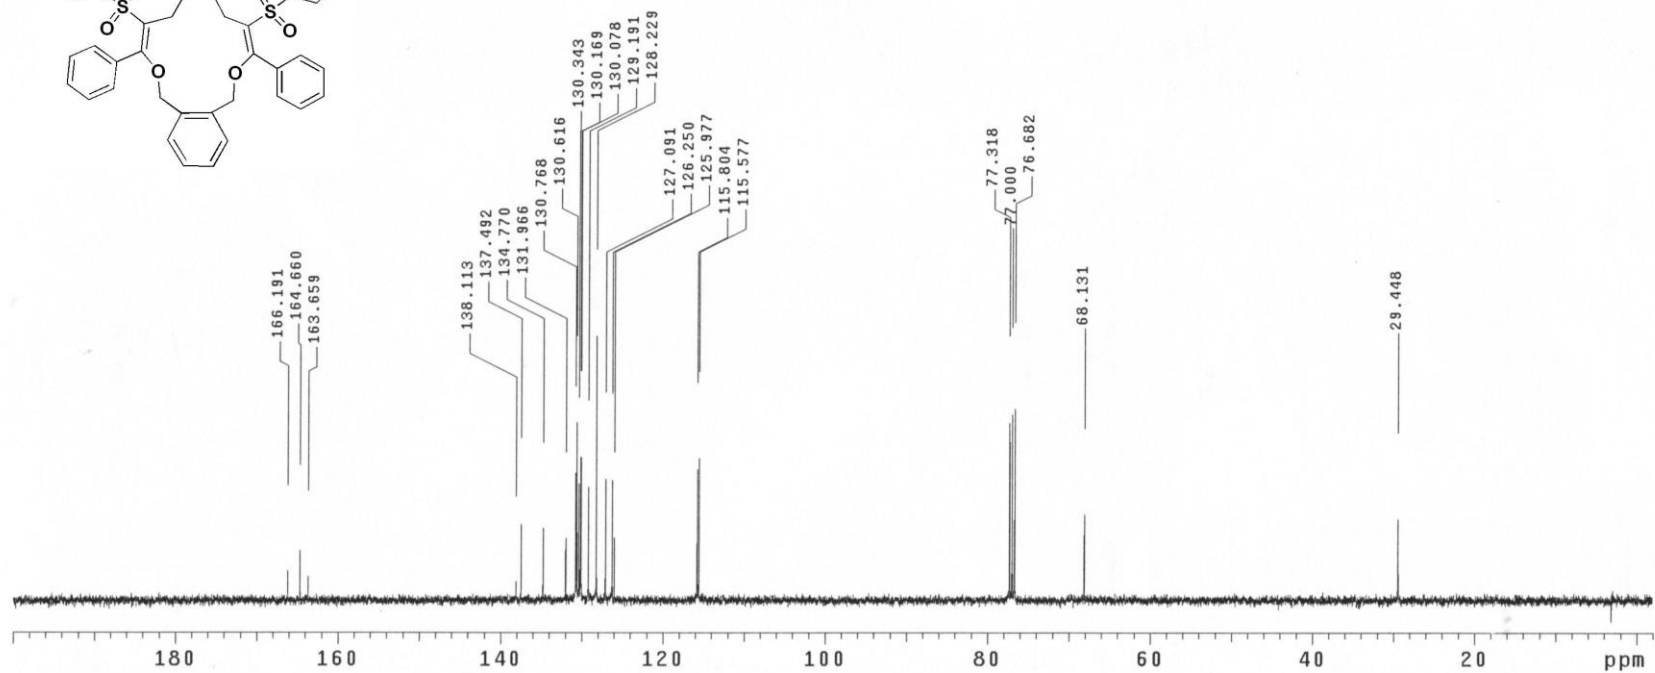

# Compound 8d (<sup>1</sup>H-NMR spectral data)

NC0721-14

Pulse Sequence: s2pu1

UNITYplus-400 "unity400"

Date: Jul 22 2020

Solvent: CDCl<sub>3</sub>

Ambient temperature

Total 32 repetitions

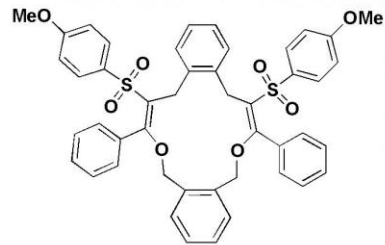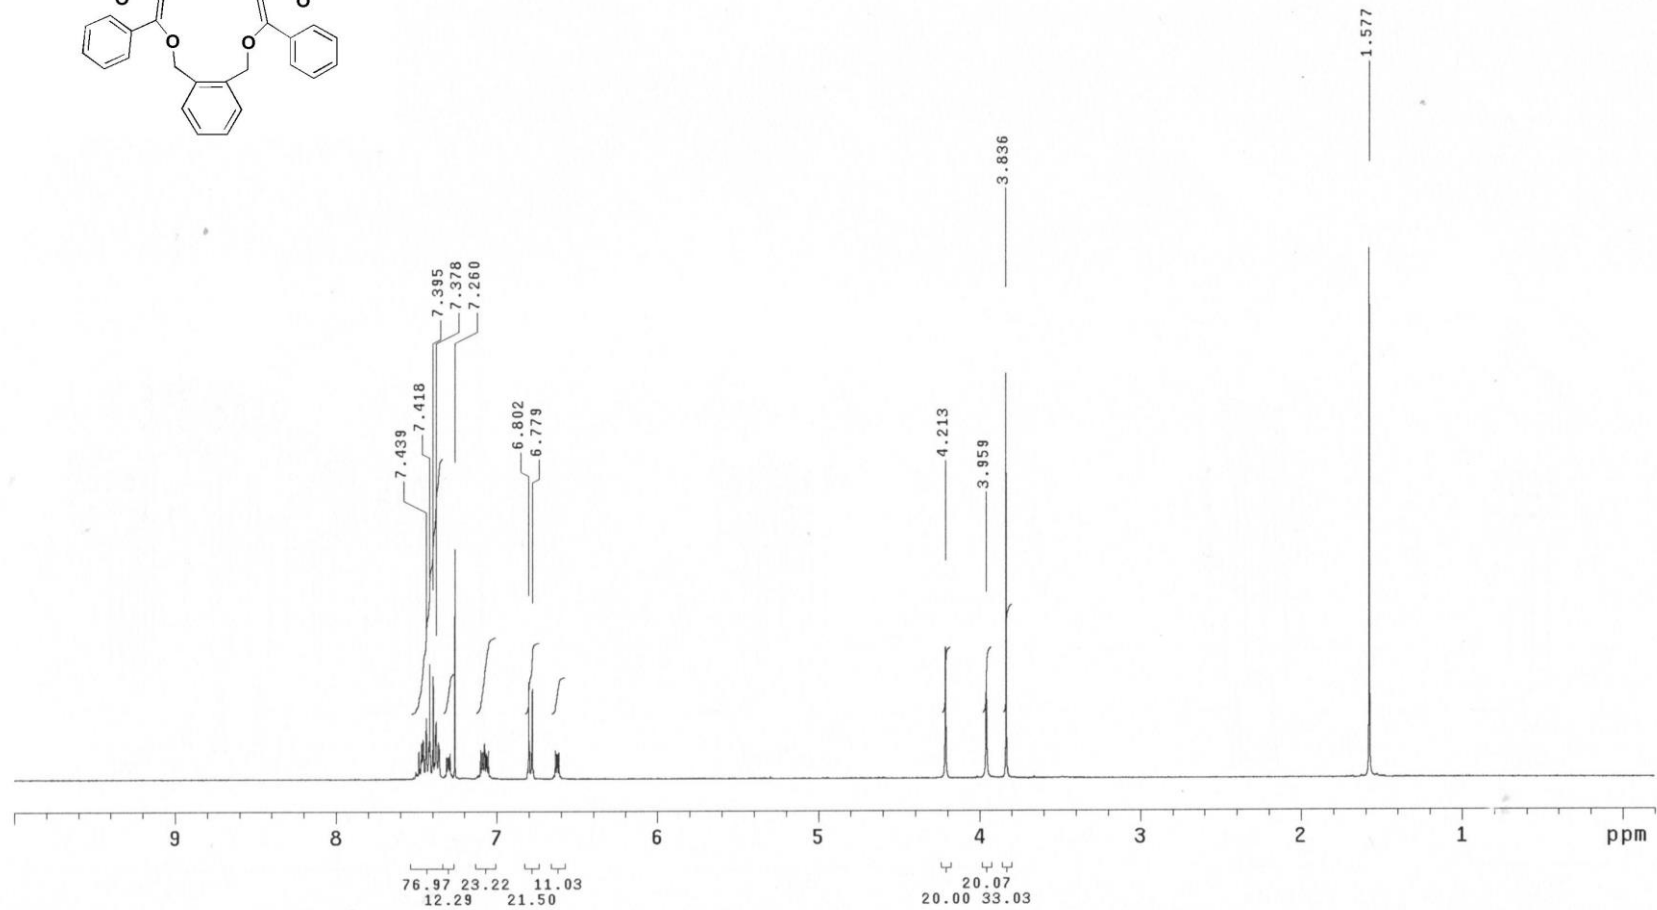

# Compound 8d (<sup>13</sup>C-NMR spectral data)

NC0721-14

Pulse Sequence: s2pu1

UNITYplus-400 "unity400"

Date: Jul 22 2020

Solvent: CDCl<sub>3</sub>

Ambient temperature

Total 4704 repetitions

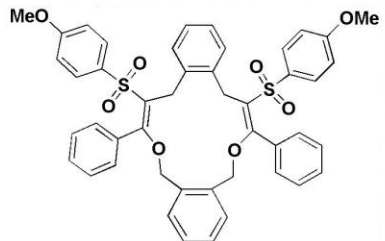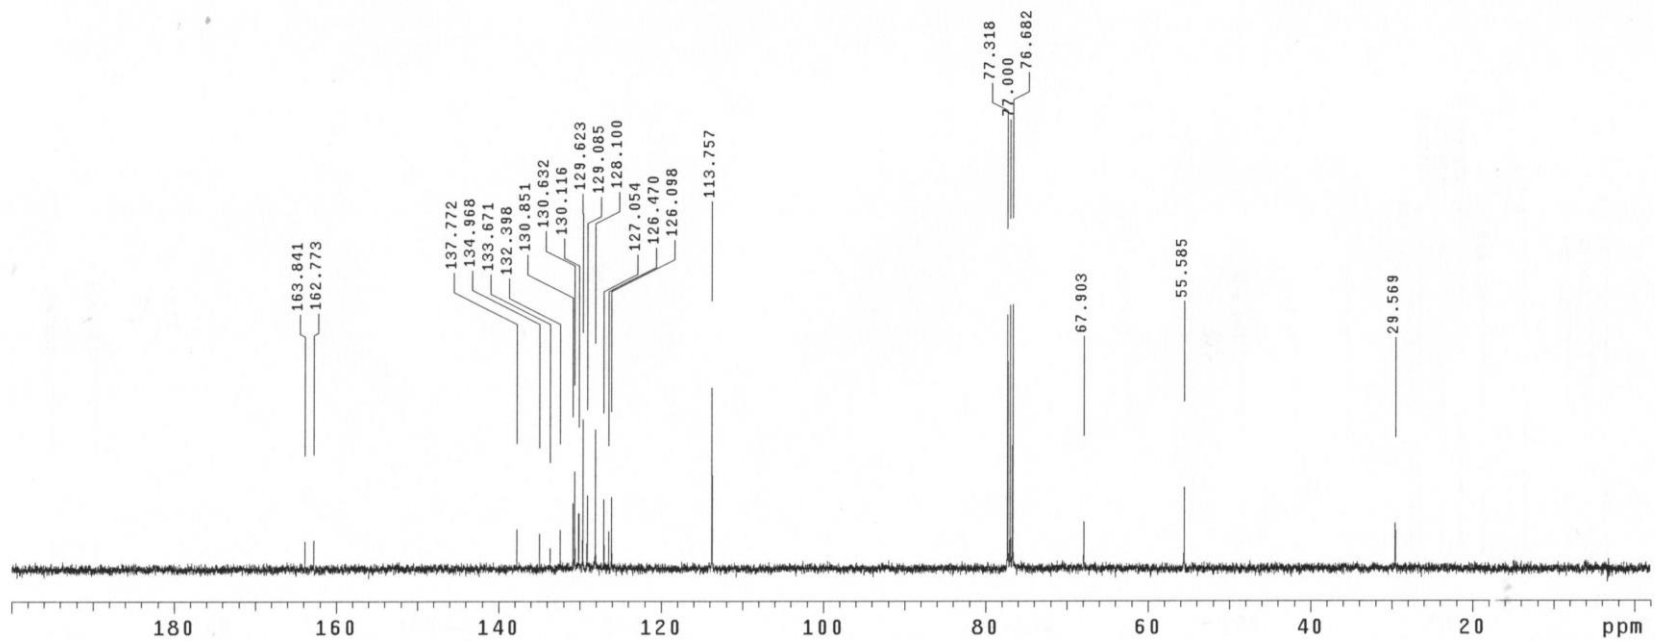

# Compound 8e (<sup>1</sup>H-NMR spectral data)

NC0709-14

Pulse Sequence: s2pu1

Solvent: CDCl<sub>3</sub>

Ambient temperature

UNITYplus-400 "unity400"

Pulse 38.8 degrees  
Acq. time 3.744 sec  
Width 6000.6 Hz  
64 repetitions  
OBSERVE H1, 400.2743814 MHz  
DATA PROCESSING  
FT size 65536  
Total time 4 min, 0 sec

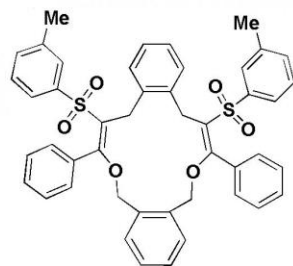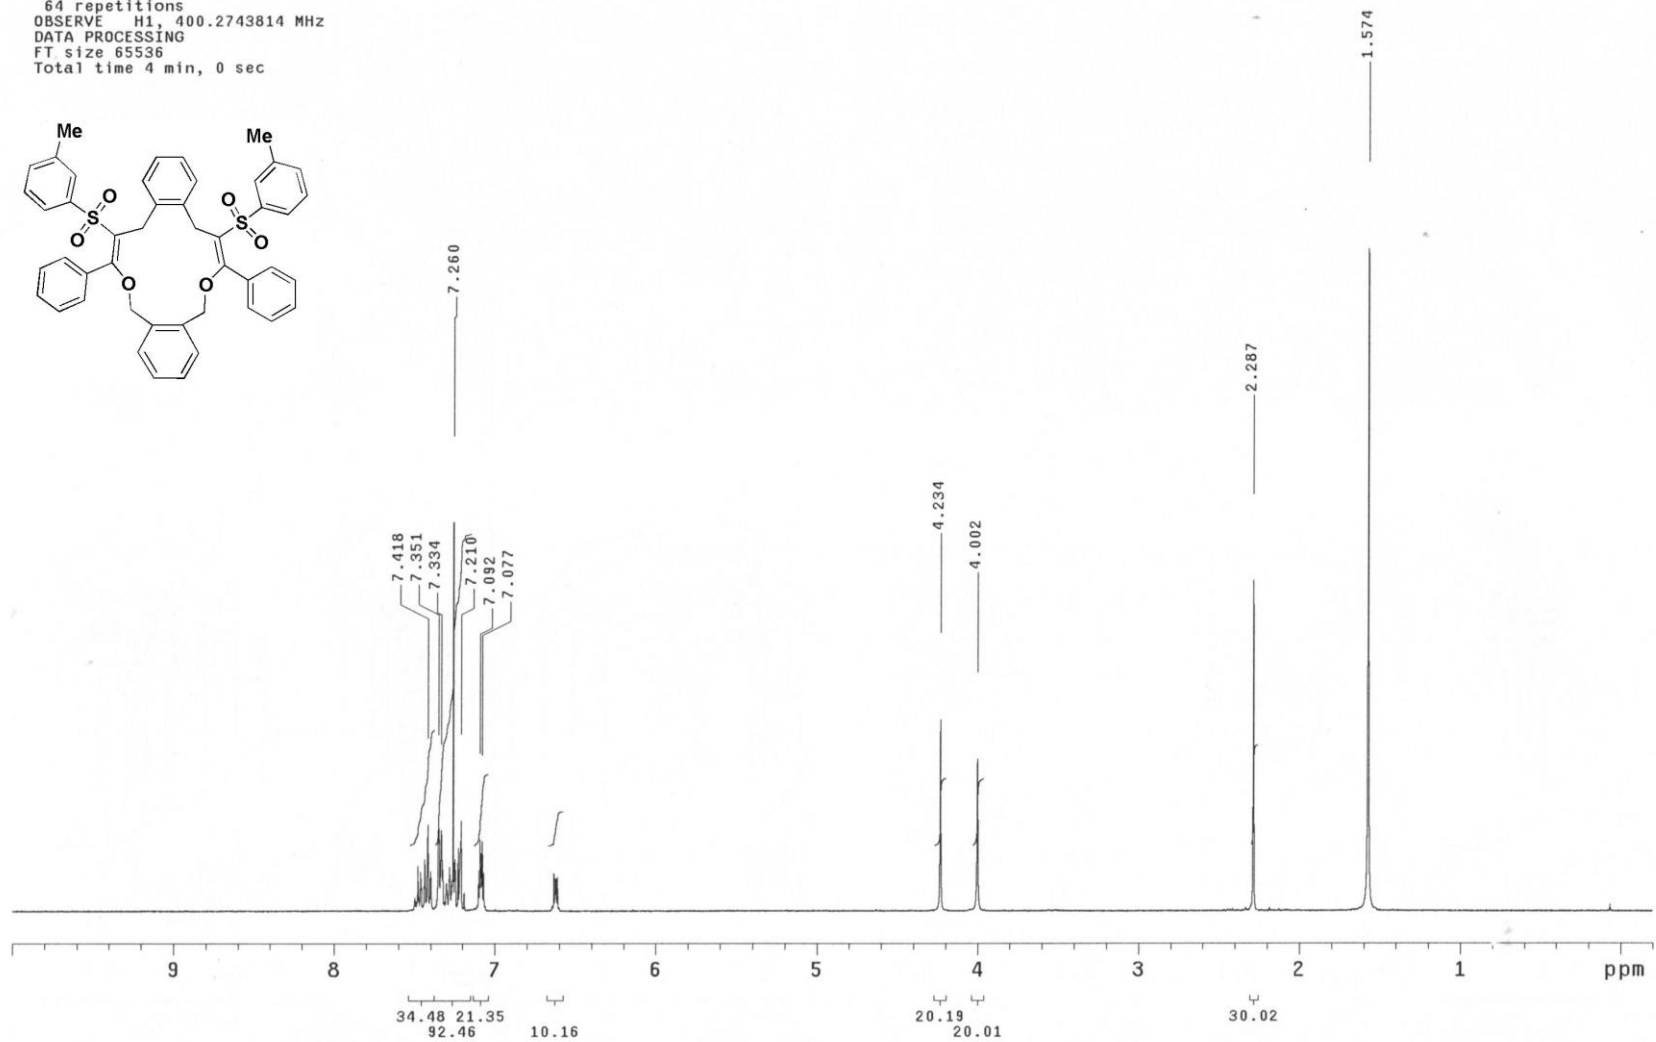

# Compound 8e (<sup>13</sup>C-NMR spectral data)

NC0709-14

Pulse Sequence: s2pul

Solvent: CDC13

Ambient temperature

UNITYplus-400 "unity400"

Relax. delay 0.500 sec

Pulse 65.8 degrees

Acq. time 0.800 sec

Width 25000.0 Hz

11376 repetitions

OBSERVE C13, 100.6490731 MHz

DECOUPLE H1, 400.2763980 MHz

Power 43 dB

on during acquisition

off during delay

WALTZ-16 modulated

DATA PROCESSING

Line broadening 1.0 Hz

FT size 65536

Total time 11 hr, 39 min, 7 sec

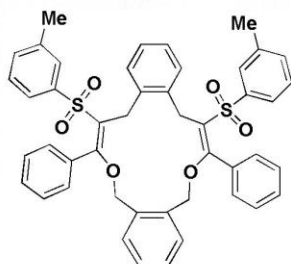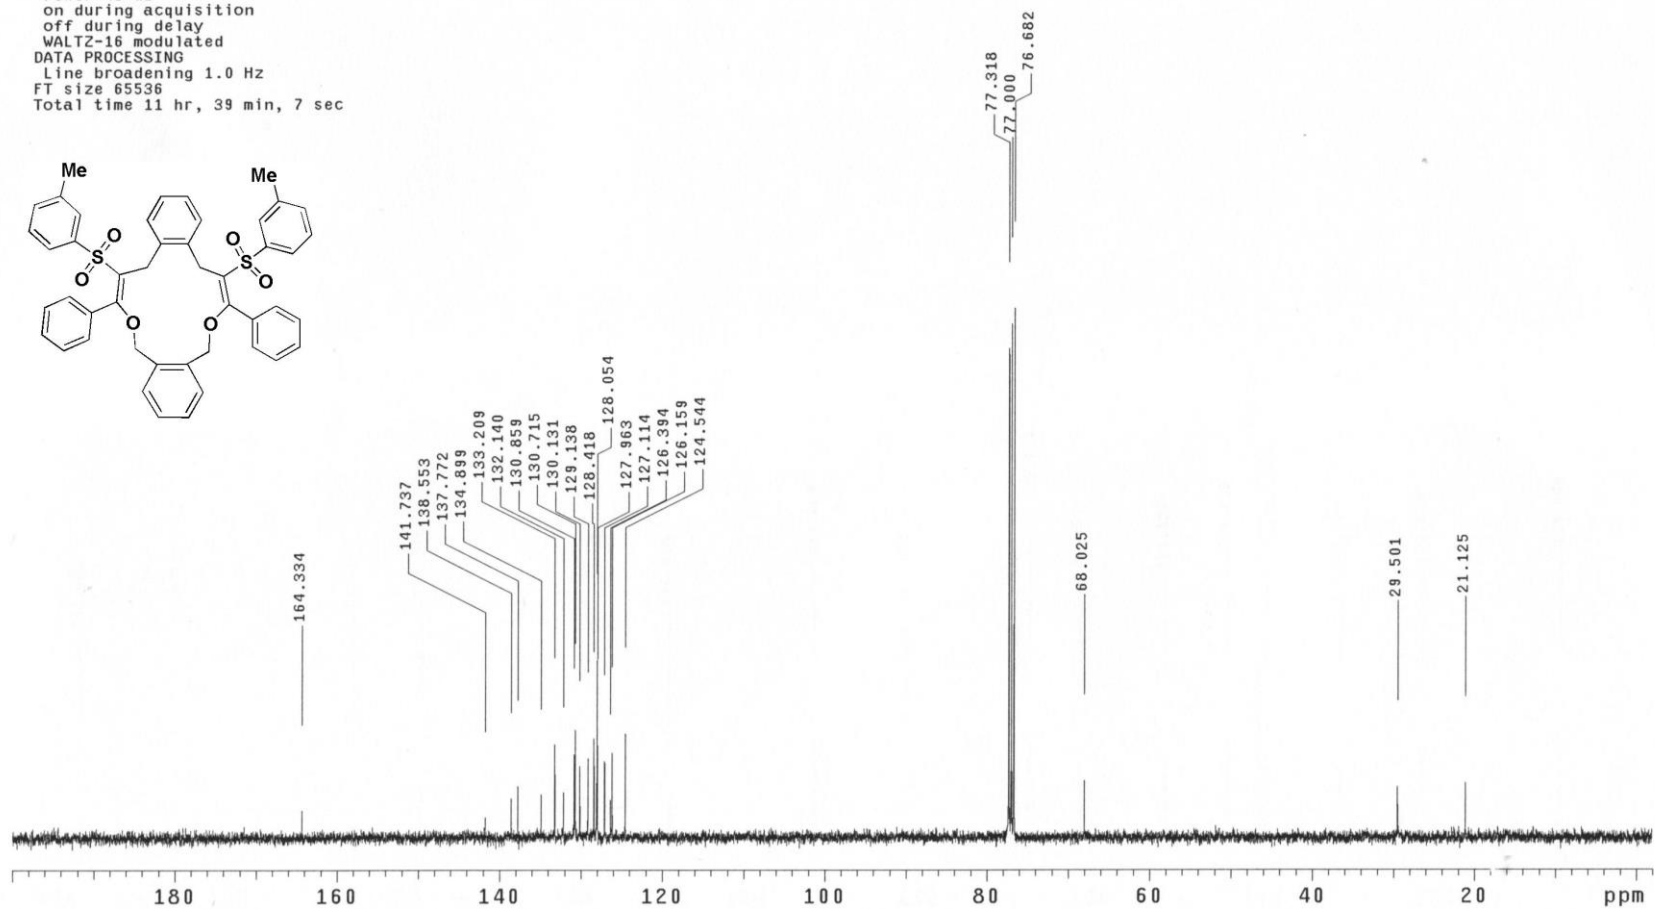

# Compound 8f (<sup>1</sup>H-NMR spectral data)

NC0702-14

Pulse Sequence: s2pu1

Solvent: CDCl<sub>3</sub>

Ambient temperature

UNITYplus-400 "unity400"

Pulse 38.8 degrees

Acq. time 3.744 sec

Width 6000.6 Hz

32 repetitions

OBSERVE H1, 400.2743814 MHz

DATA PROCESSING

FT size 65536

Total time 2 min, 0 sec

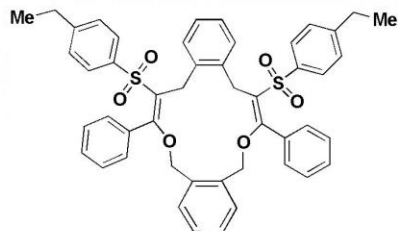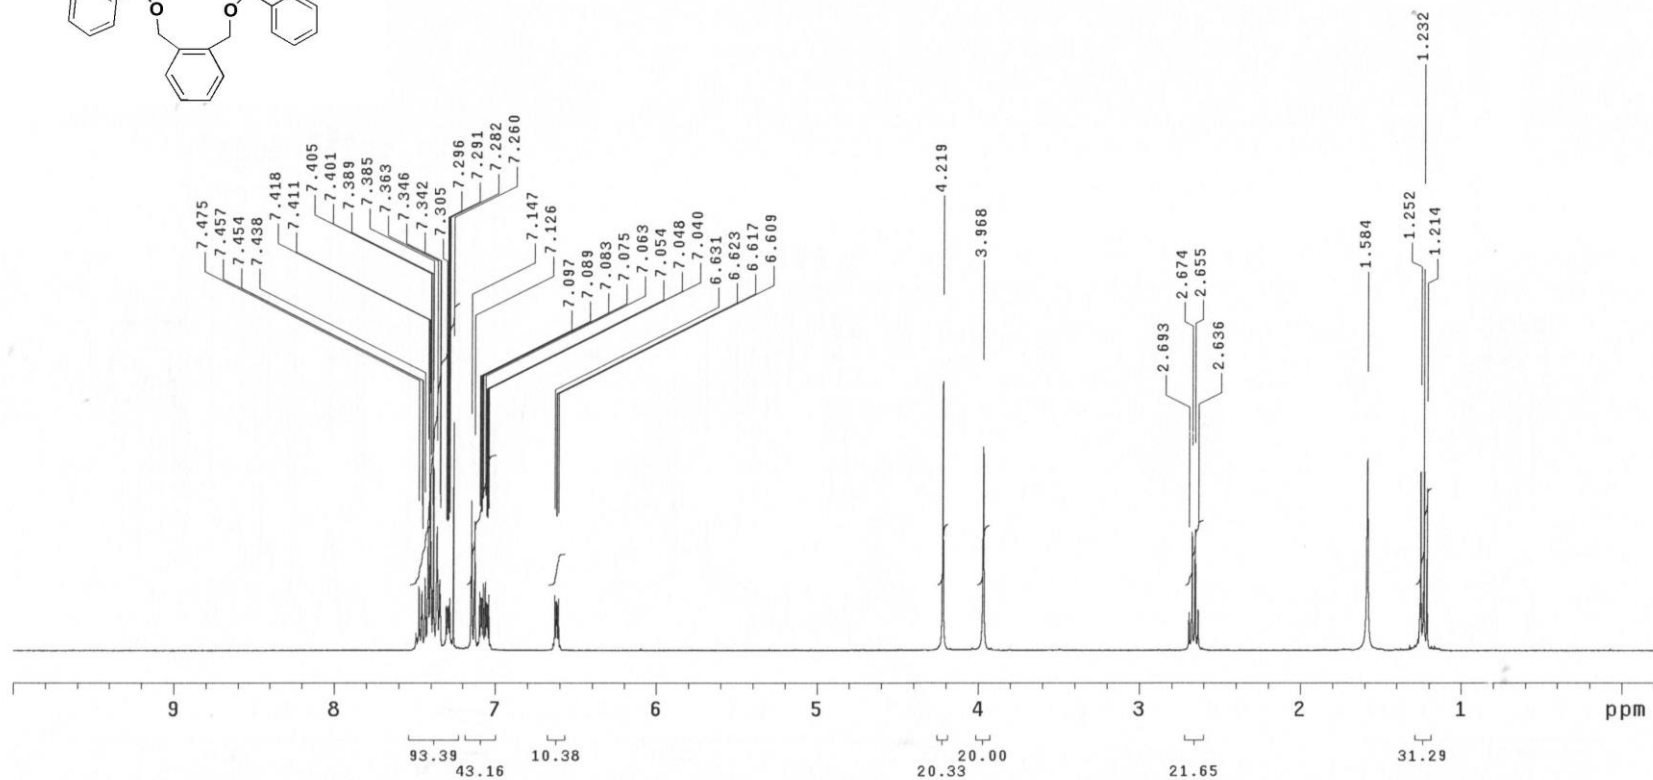



# Compound 8f (<sup>13</sup>C-NMR spectral data)

NC0702-14

Pulse Sequence: s2pu1

Solvent: CDCl<sub>3</sub>

Ambient temperature

UNITYplus-400 "unity400"

Relax. delay 0.500 sec

Pulse 65.8 degrees

Acq. time 0.800 sec

Width 25000.0 Hz

2544 repetitions

OBSERVE C13, 100.6490738 MHz

DECOUPLE H1, 400.2763980 MHz

Power 43 dB

on during acquisition

off during delay

WALTZ-16 modulated

DATA PROCESSING

Line broadening 1.0 Hz

FT size 65536

Total time 23 hr, 18 min, 14 sec

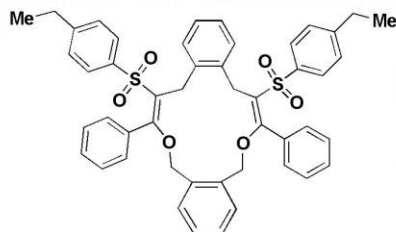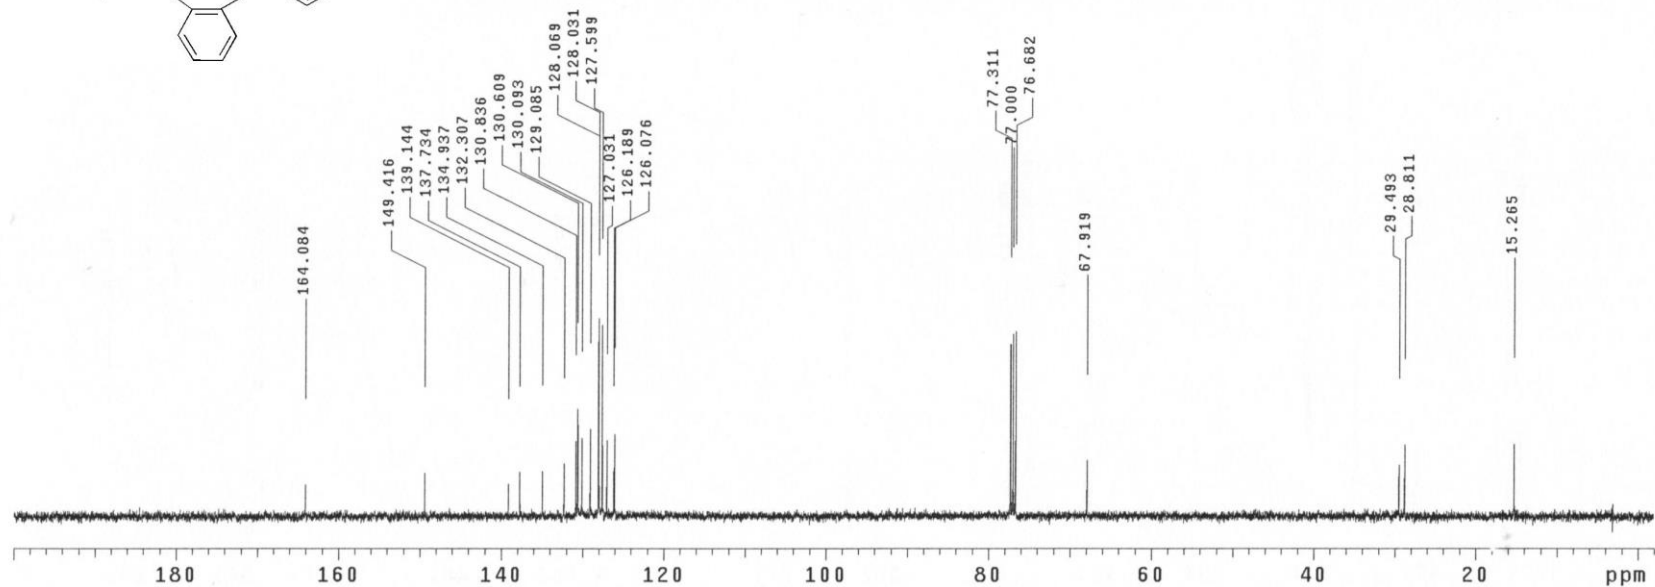

# Compound 8g (<sup>1</sup>H-NMR spectral data)

NC0722-14

Pulse Sequence: s2pu1

UNITYplus-400 "unity400"

Date: Jul 27 2020

Solvent: CDCl<sub>3</sub>

Ambient temperature

Total 64 repetitions

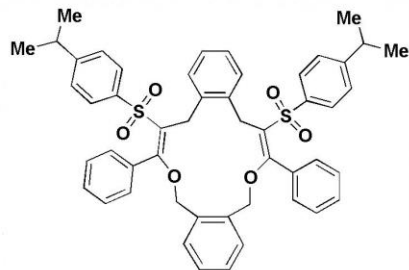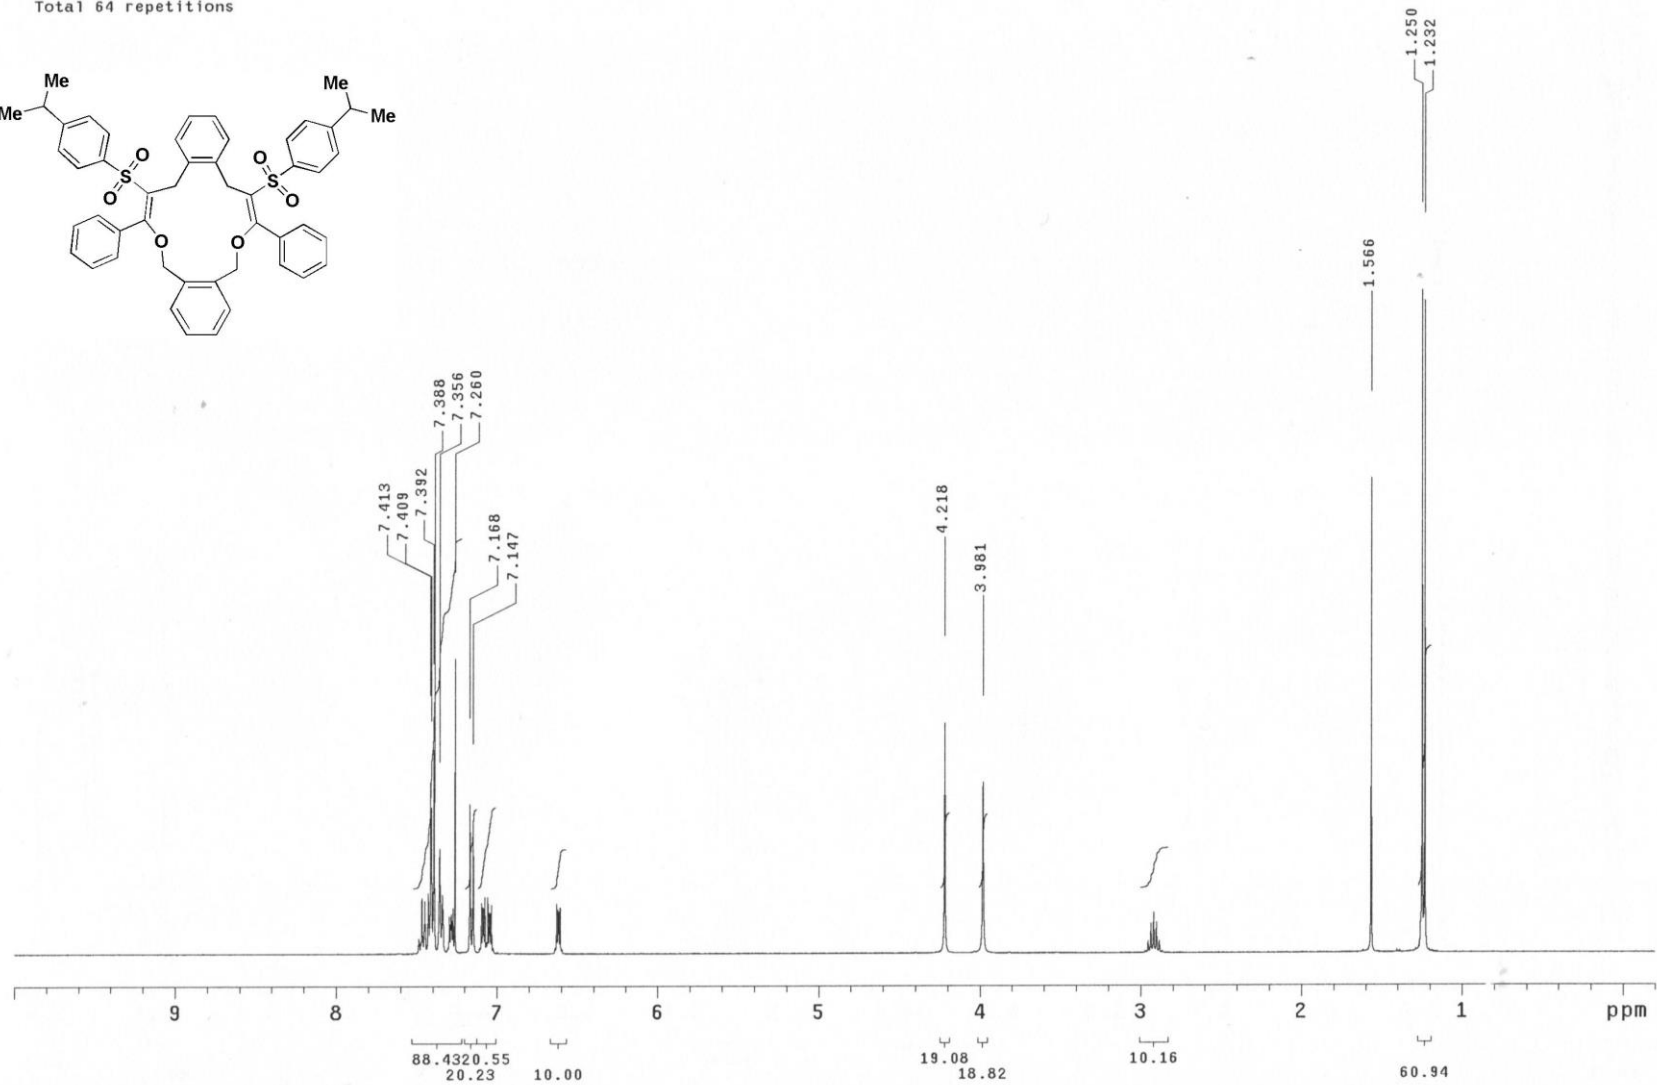

# Compound 8g (<sup>13</sup>C-NMR spectral data)

NC0722-14

Pulse Sequence: s2pu1

UNITYplus-400 "unity400"

Date: Jul 27 2020

Solvent: CDCl<sub>3</sub>

Ambient temperature

Total 2560 repetitions

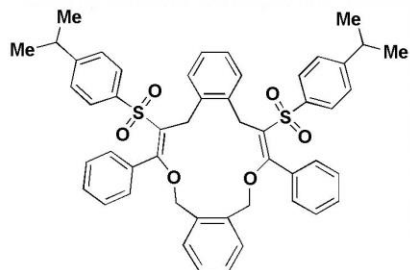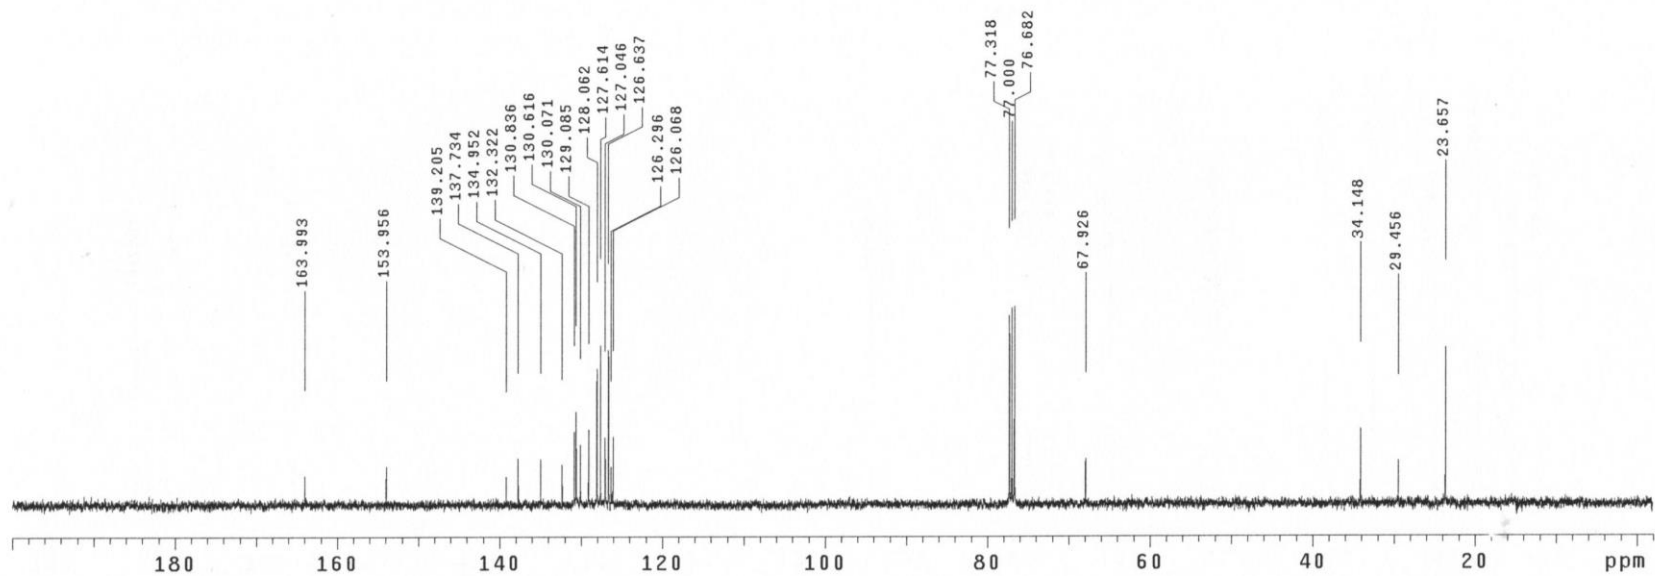

# Compound 8h (<sup>1</sup>H-NMR spectral data)

NC0701-14

Pulse Sequence: s2pu1

Solvent: CDCl<sub>3</sub>

Ambient temperature

UNITYplus-400 "unity400"

Pulse 38.8 degrees

Acq. time 3.744 sec

Width 6000.6 Hz

32 repetitions

OBSERVE H1, 400.2743814 MHz

DATA PROCESSING

FT size 65536

Total time 2 min, 0 sec

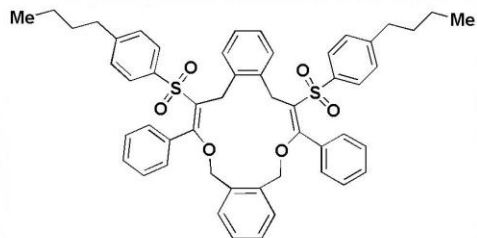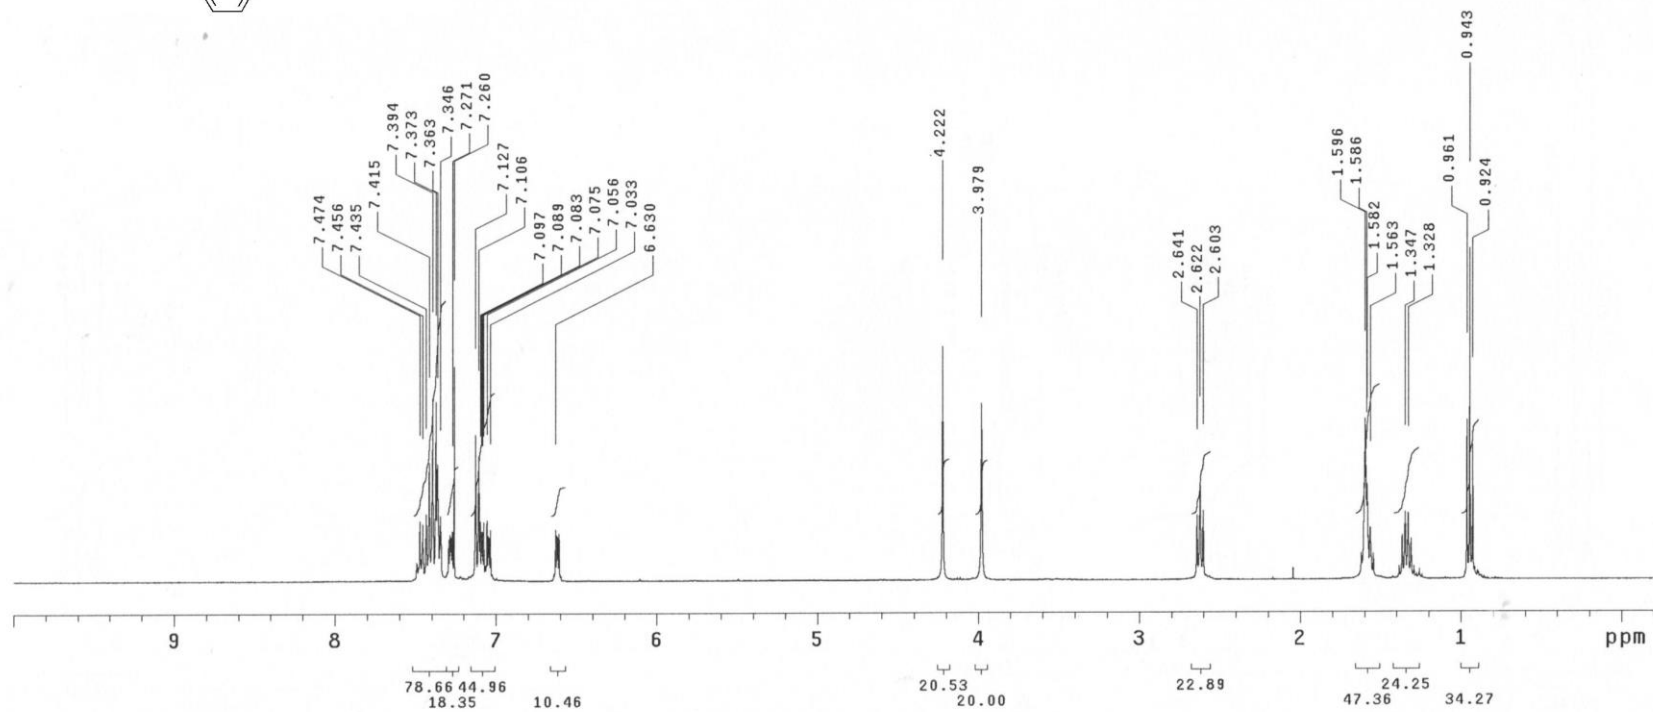

# Compound 8h (<sup>13</sup>C-NMR spectral data)

NC0701-14

Pulse Sequence: s2pu1

Solvent: CDCl<sub>3</sub>

Ambient temperature

UNITYplus-400 "unity400"

Relax. delay 0.500 sec

Pulse 65.8 degrees

Acq. time 0.800 sec

Width 25000.0 Hz

1472 repetitions

OBSERVE C13, 100.6490738 MHz

DECOUPLE H1, 400.2763980 MHz

Power 43 dB

on during acquisition

off during delay

WALTZ-16 modulated

DATA PROCESSING

Line broadening 1.0 Hz

FT size 65536

Total time 11 hr, 39 min, 7 sec

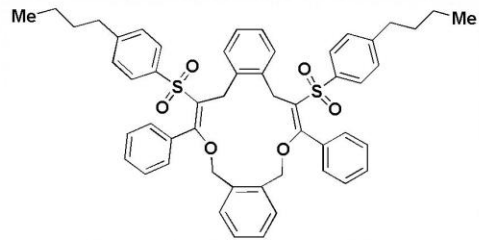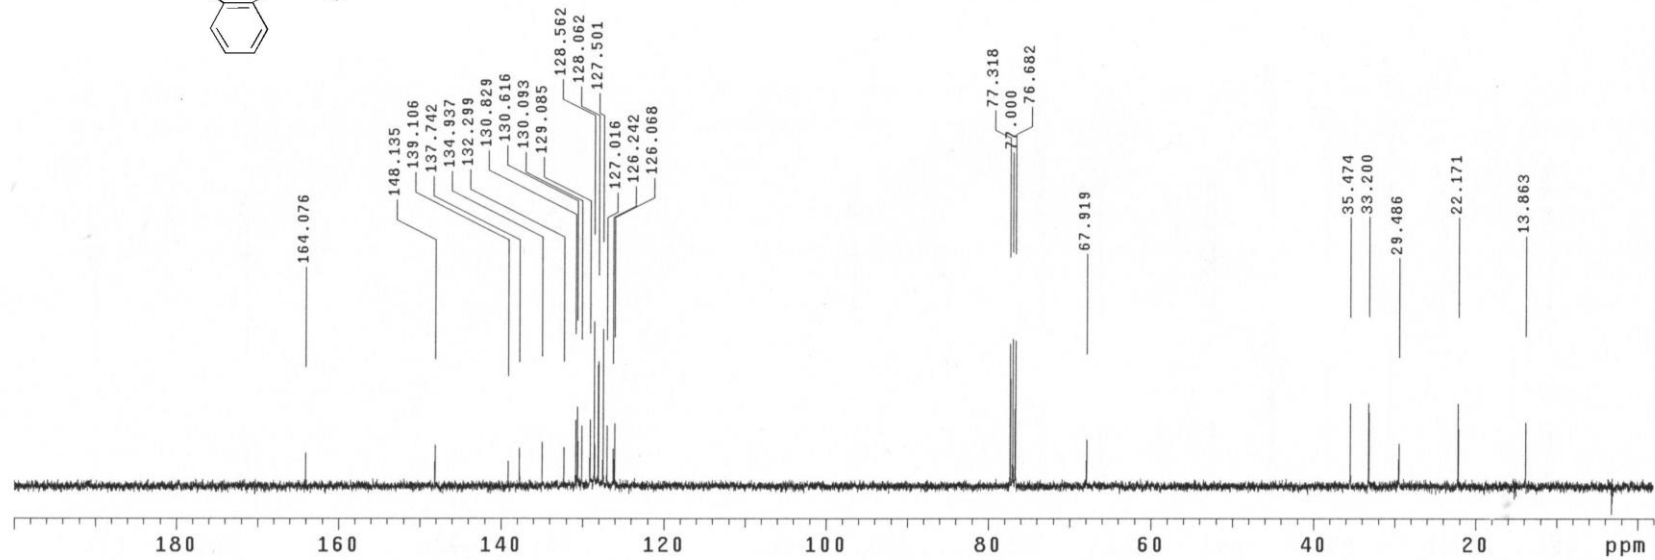

# Compound 8i (<sup>1</sup>H-NMR spectral data)

NC0707-14

Pulse Sequence: s2pu1

Solvent: CDCl<sub>3</sub>

Ambient temperature

UNITYplus-400 "unity400"

Pulse 38.8 degrees

Acq. time 3.744 sec

Width 6000.6 Hz

64 repetitions

OBSERVE H1, 400.2743814 MHz

DATA PROCESSING

FT size 65536

Total time 4 min, 0 sec

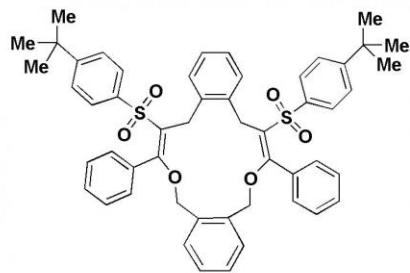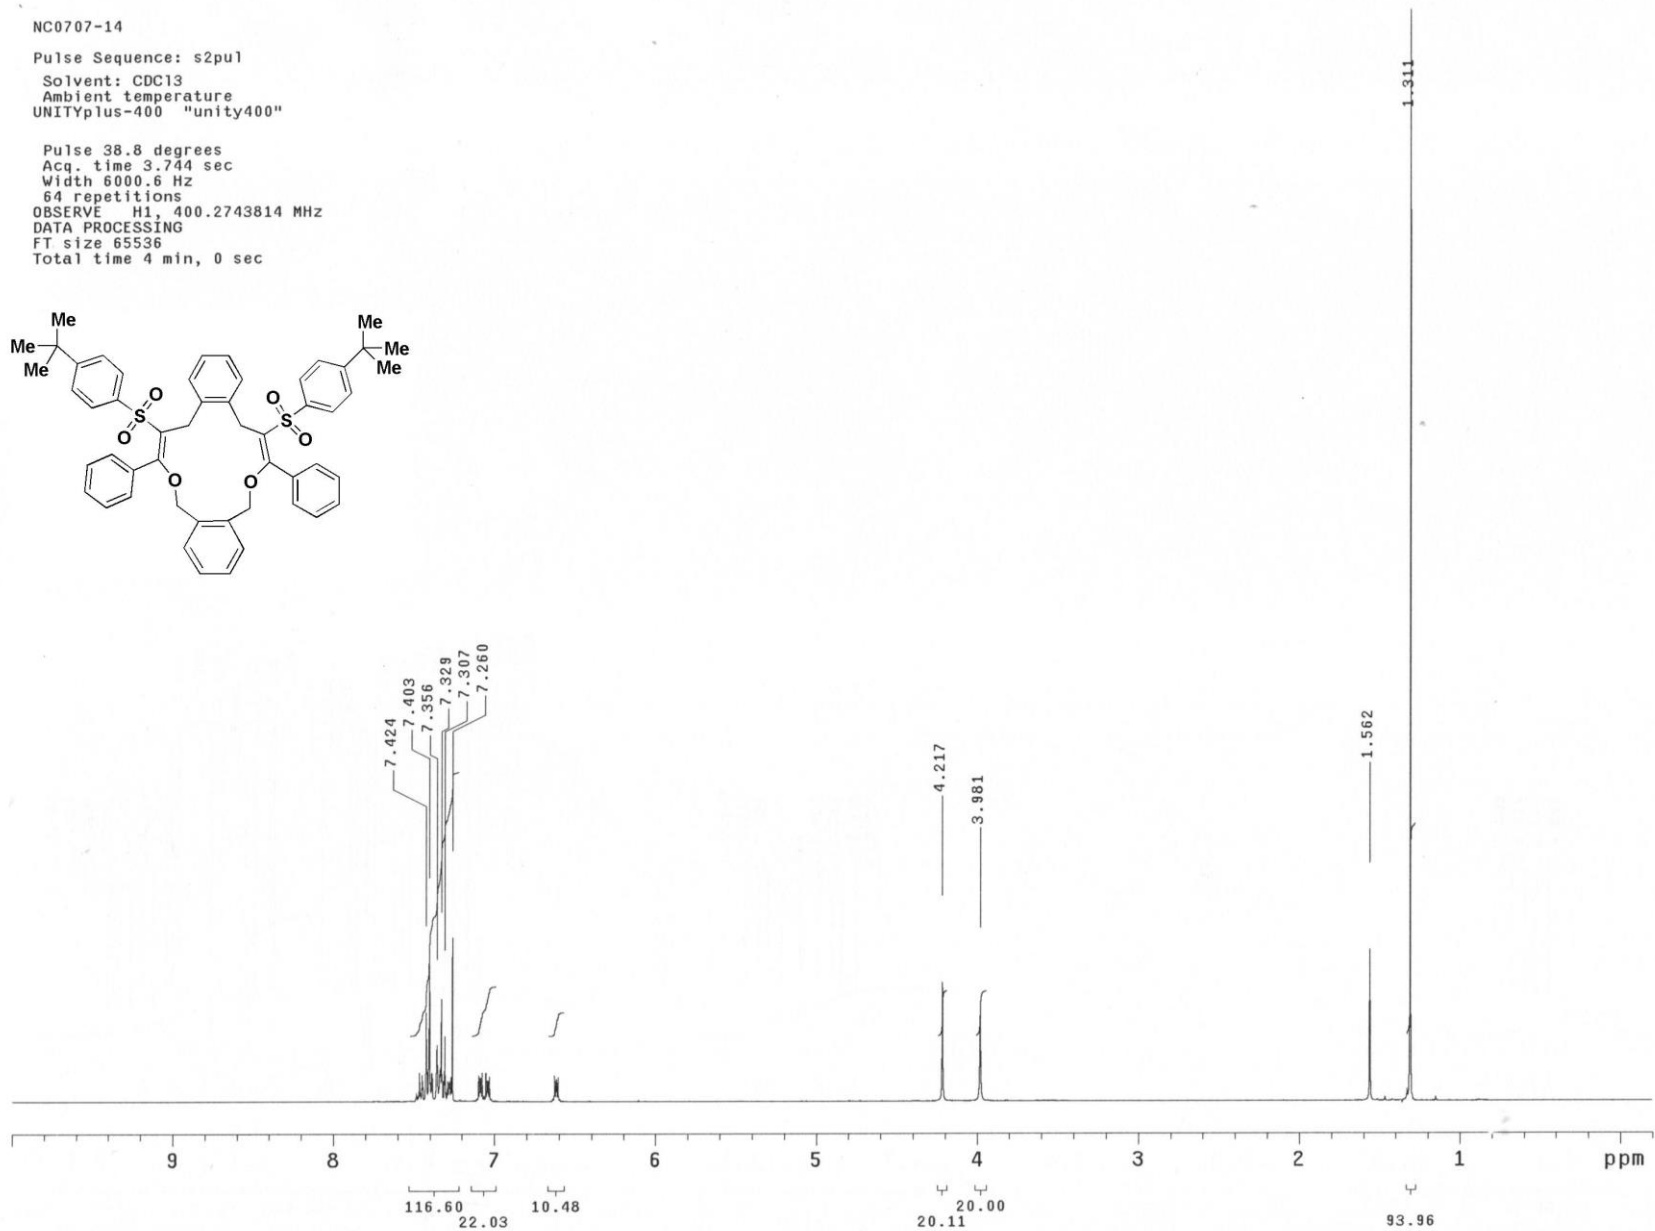

# Compound 8i (<sup>13</sup>C-NMR spectral data)

NC0707-14

Pulse Sequence: s2pu1

Solvent: CDCl<sub>3</sub>

Ambient temperature

UNITYplus-400 "unity400"

Relax. delay 0.500 sec

Pulse 65.8 degrees

Acq. time 0.800 sec

Width 25000.0 Hz

5104 repetitions

OBSERVE C13, 100.6490731 MHz

DECOUPLE H1, 400.2763980 MHz

Power 43 dB

on during acquisition

off during delay

WALTZ-16 modulated

DATA PROCESSING

Line broadening 1.0 Hz

FT size 65536

Total time 11 hr, 39 min, 7 sec

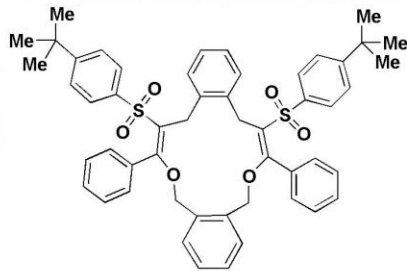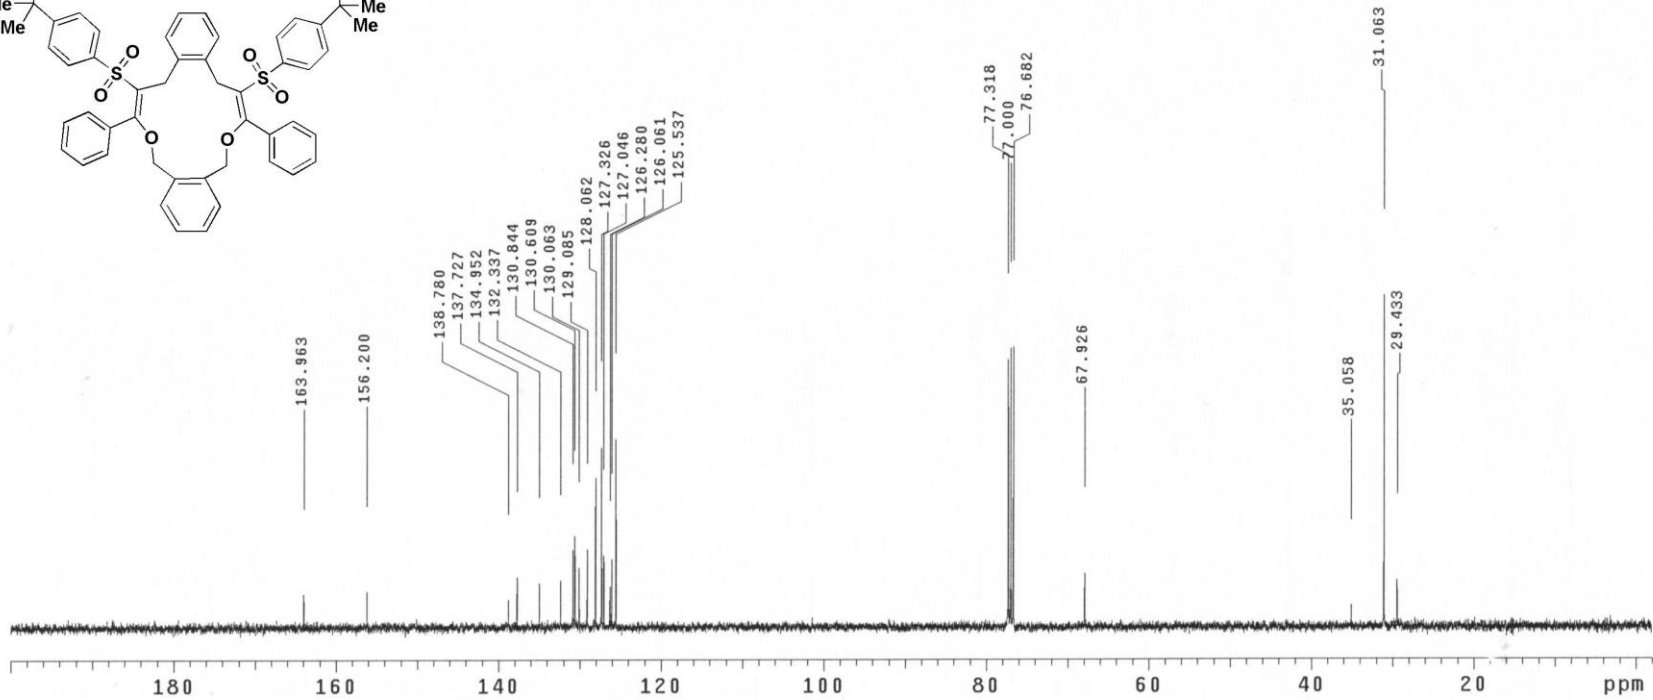

# Compound 8j (<sup>1</sup>H-NMR spectral data)

NC0720-14

Pulse Sequence: s2pu1  
UNITYplus-400 "unity400"  
Date: Aug 5 2020  
Solvent: CDCl<sub>3</sub>  
Ambient temperature  
Total 64 repetitions

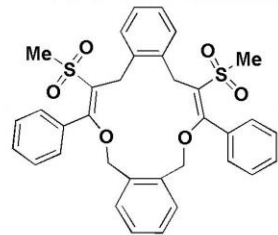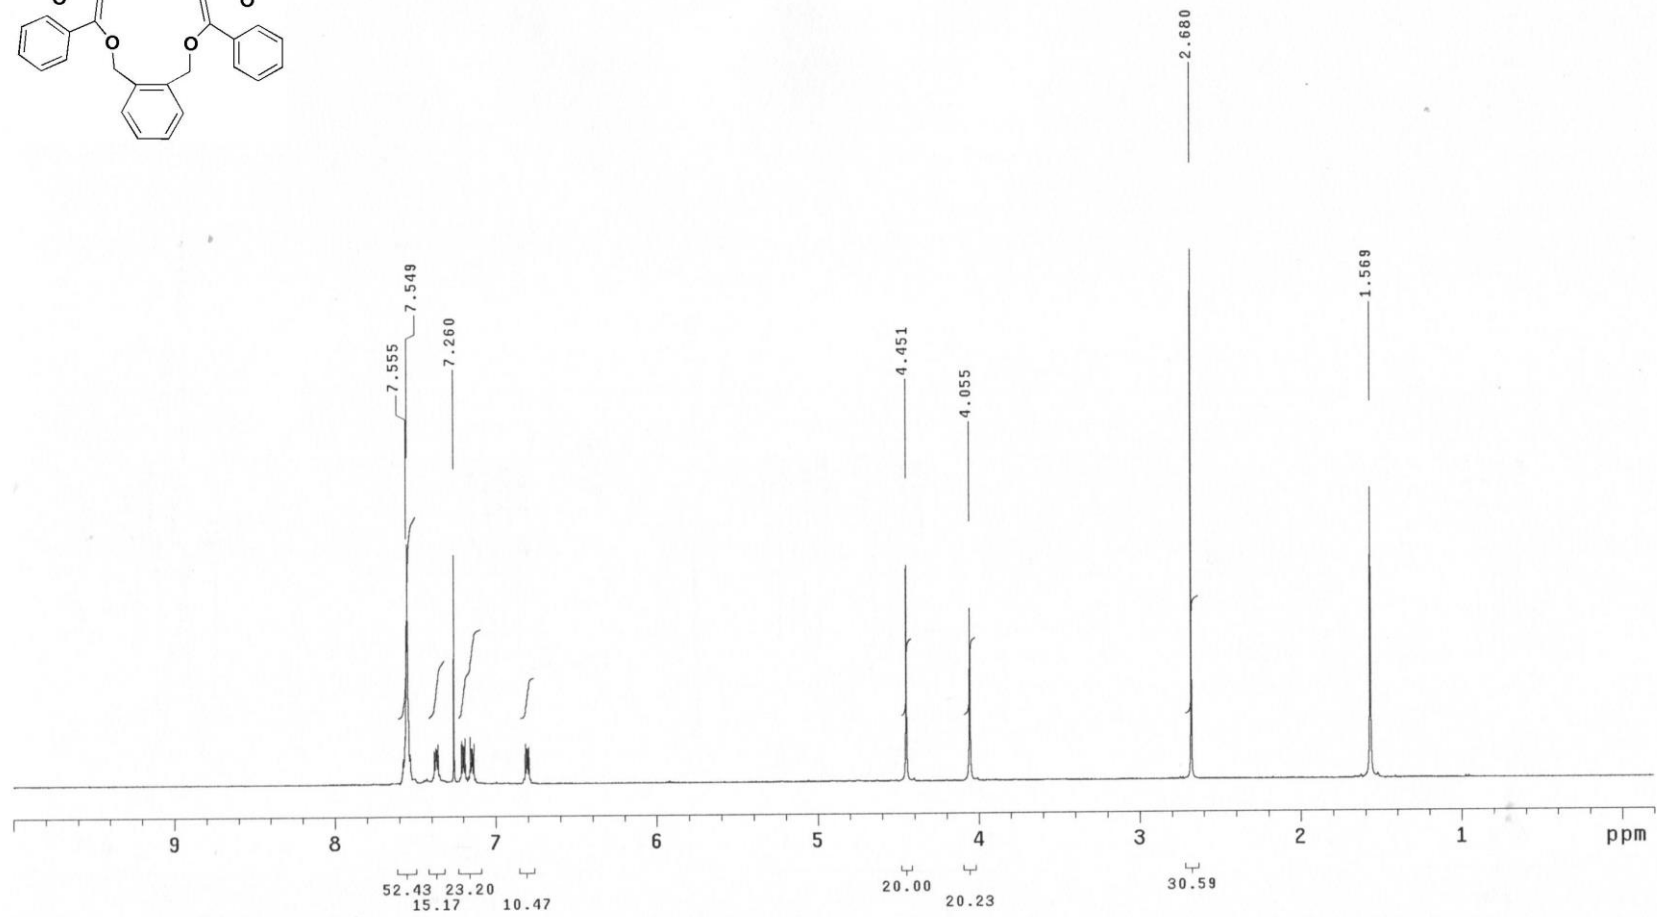



# Compound 8j (<sup>13</sup>C-NMR spectral data)

NC0720-14

Pulse Sequence: s2pu1

UNITYplus-400 "unity400"

Date: Aug 5 2020

Solvent: CDCl<sub>3</sub>

Ambient temperature

Total 4352 repetitions

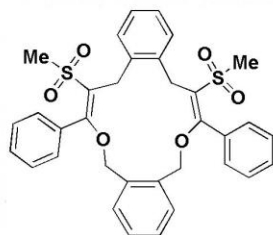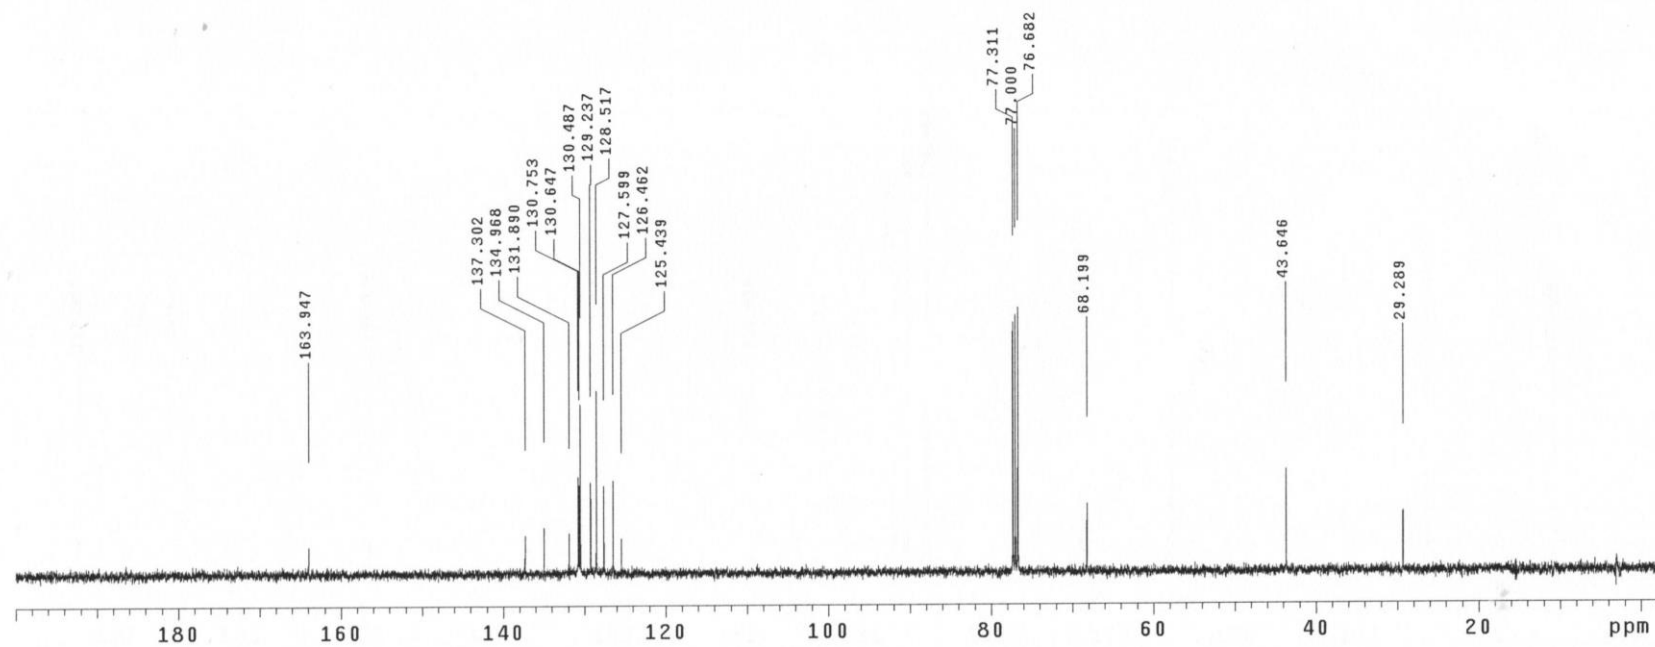

# Compound 8k (<sup>1</sup>H-NMR spectral data)

NC0713-14

Pulse Sequence: s2pu1

UNITYplus-400 "unity400"

Date: Jul 16 2020

Solvent: CDCl<sub>3</sub>

Ambient temperature

Total 32 repetitions

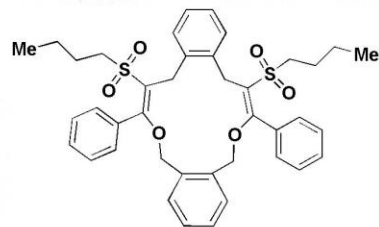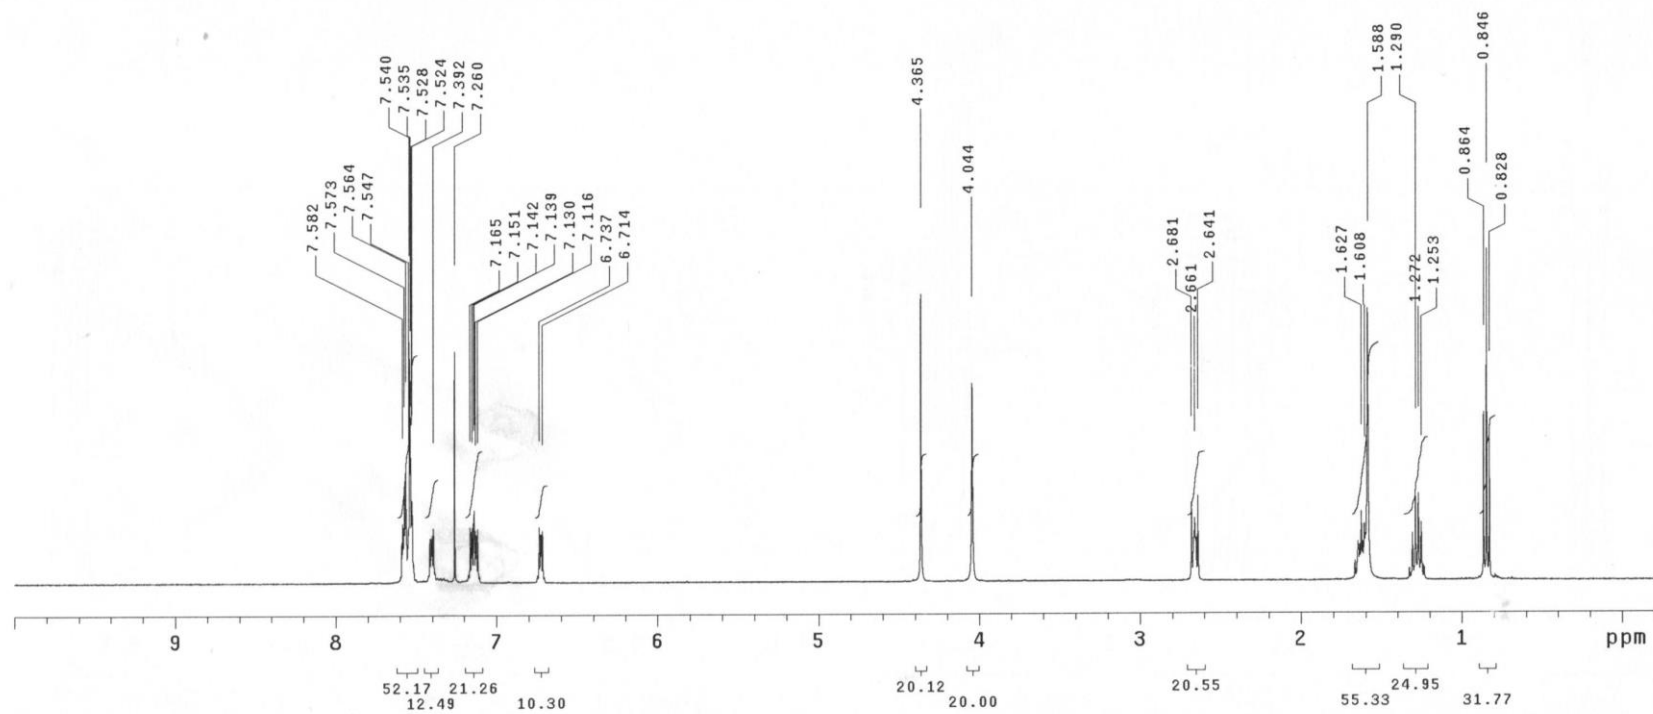

# Compound 8k (<sup>13</sup>C-NMR spectral data)

NC0713-14

Pulse Sequence: s2pu1

UNITYplus-400 "unity400"

Date: Jul 16 2020

Solvent: CDCl<sub>3</sub>

Ambient temperature

Total 2256 repetitions

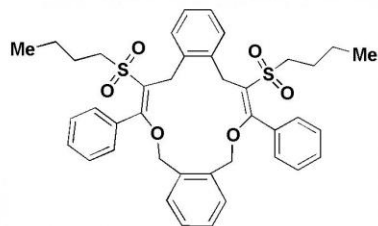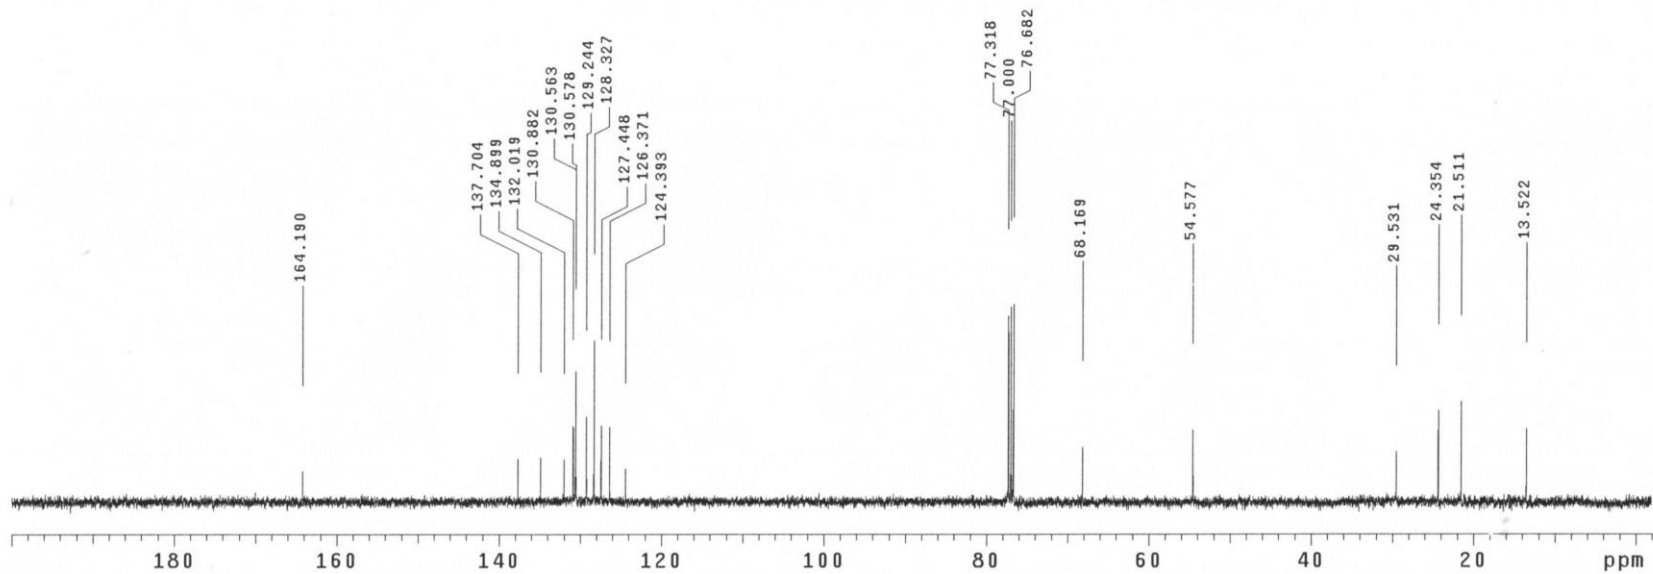

# Compound 8I (<sup>1</sup>H-NMR spectral data)

KT0609-14

Pulse Sequence: s2pu1

UNITYplus-400 "unity400"

Date: Jun 10 2020

Solvent: CDCl<sub>3</sub>

Ambient temperature

Total 32 repetitions

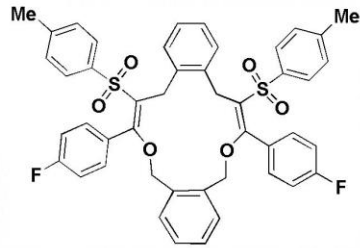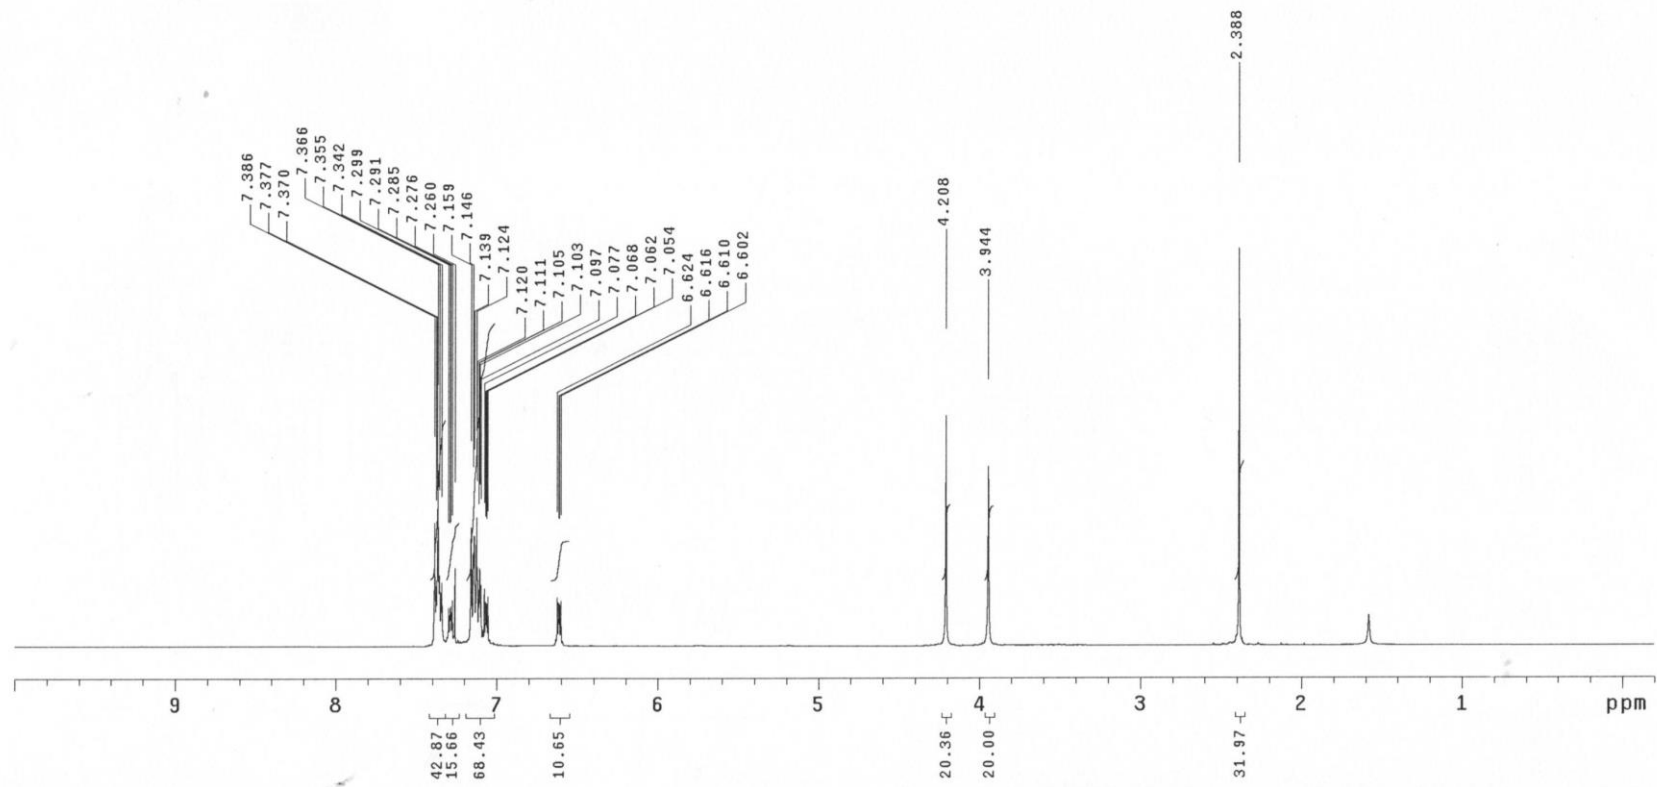

# Compound 8I (<sup>13</sup>C-NMR spectral data)

KT0609-14

Pulse Sequence: s2pu1

UNITYplus-400 "unity400"

Date: Jun 10 2020

Solvent: CDC13

Ambient temperature

Total 1424 repetitions

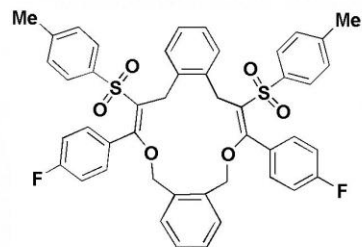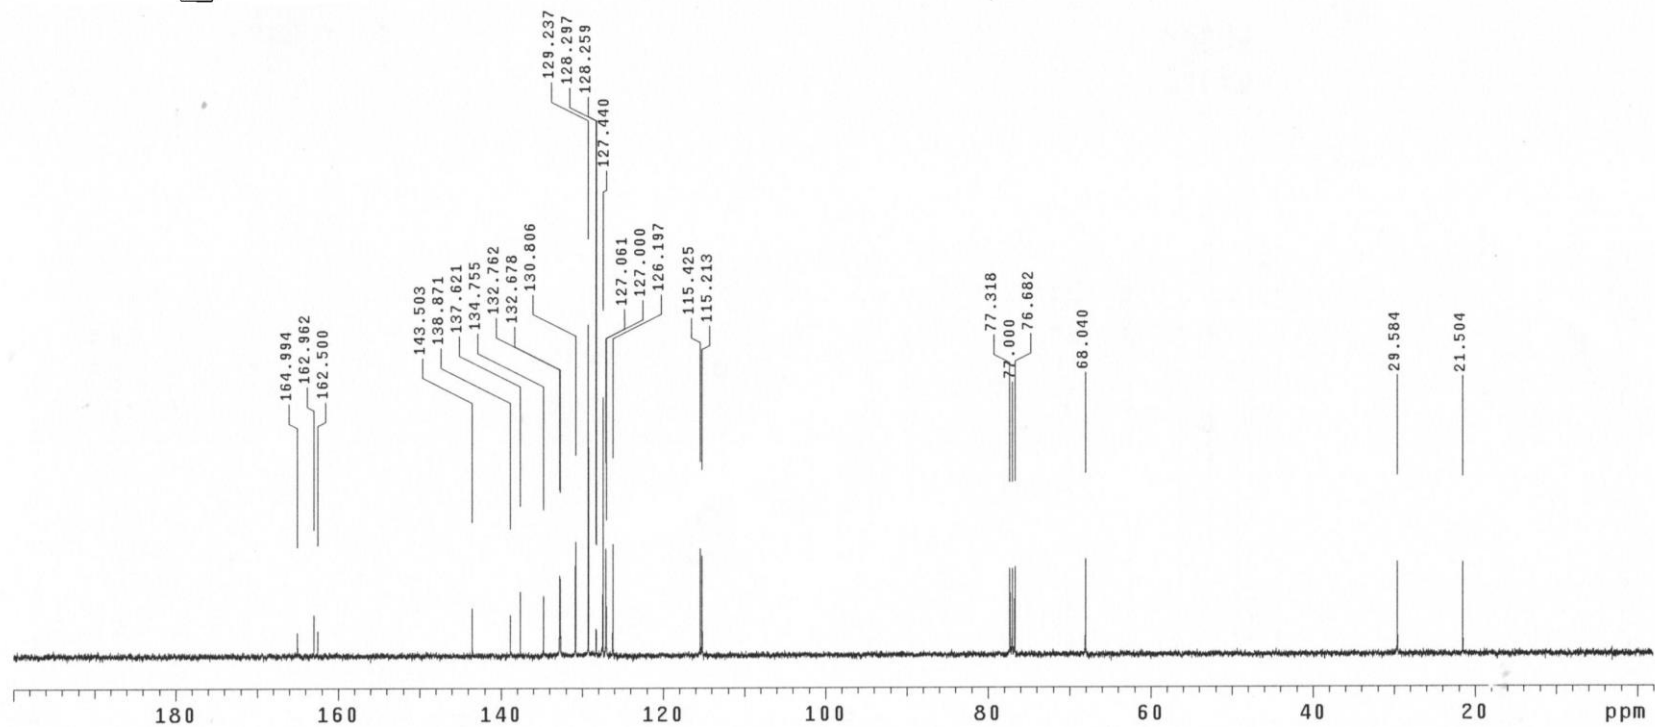

# Compound 8m (<sup>1</sup>H-NMR spectral data)

KT0512-14

Pulse Sequence: s2pu1

UNITYplus-400 "unity400"

Date: May 28 2020

Solvent: CDC13

Ambient temperature

Total 64 repetitions

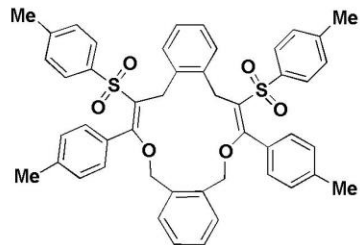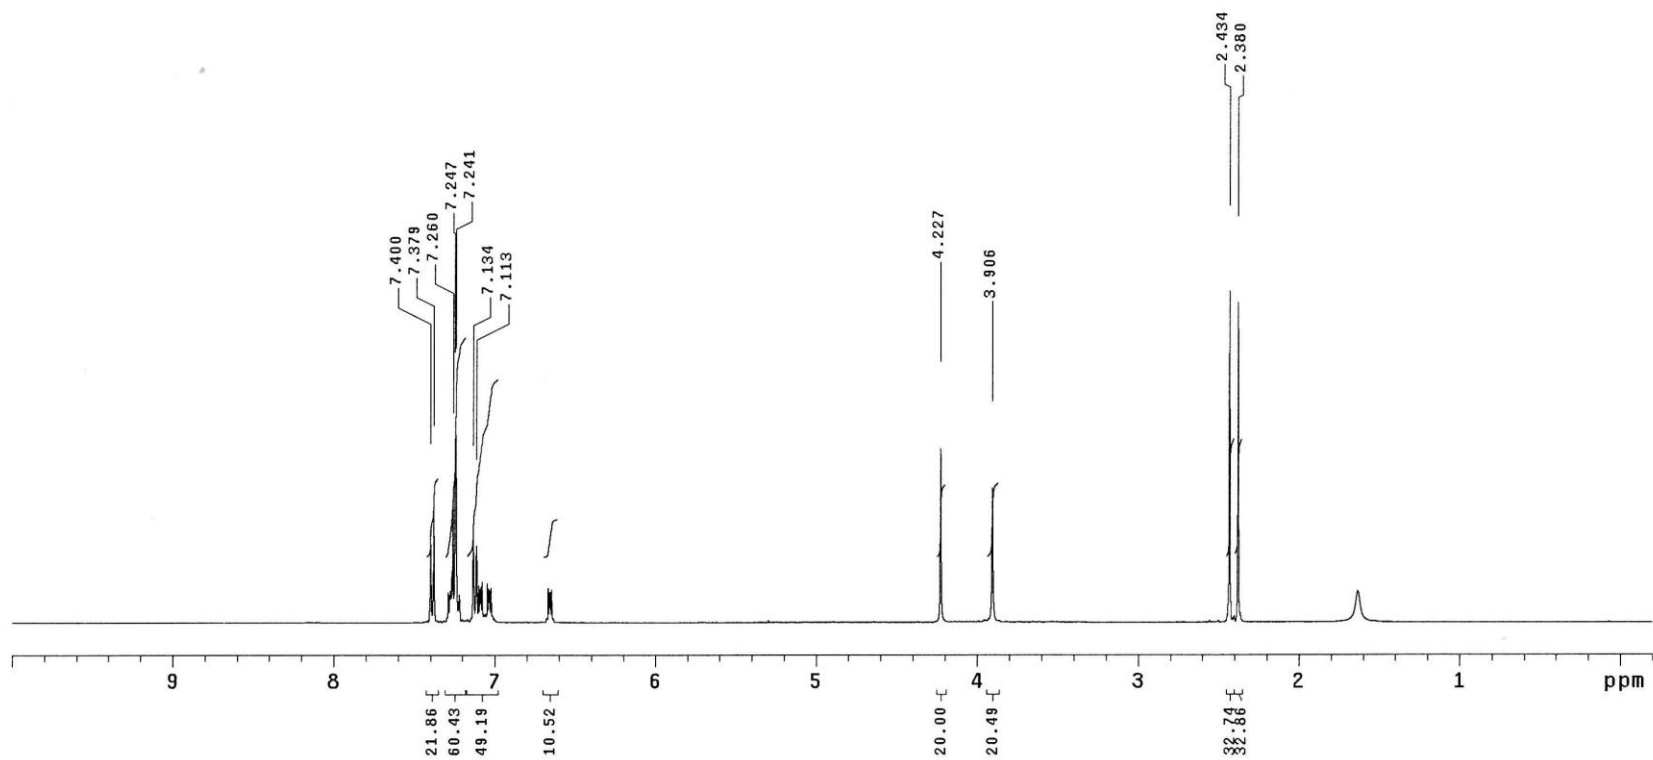

# Compound 8m (<sup>13</sup>C-NMR spectral data)

KT0512-14

Pulse Sequence: s2pu1

UNITYplus-400 "unity400"

Date: May 28 2020

Solvent: CDCl<sub>3</sub>

Ambient temperature

Total 2048 repetitions

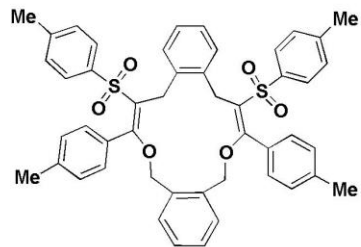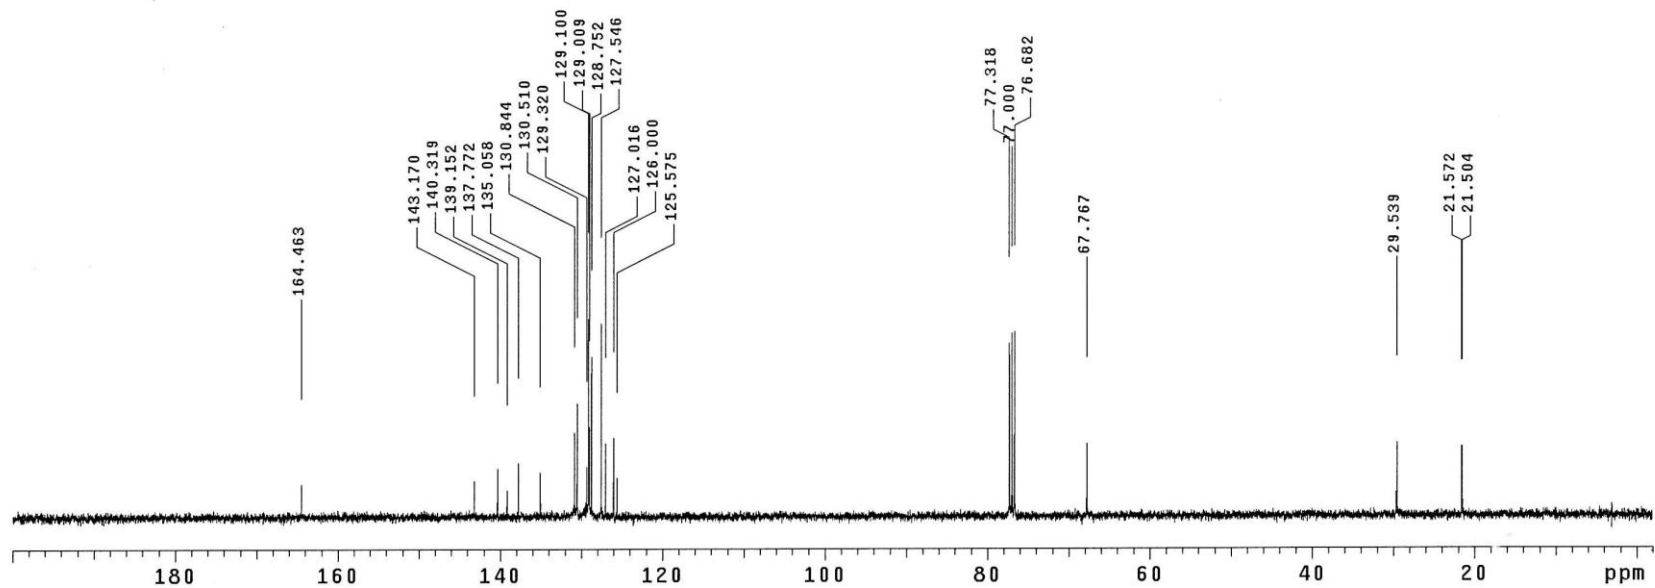

# Compound 8m-1 (<sup>1</sup>H-NMR spectral data)

KTMe56

Pulse Sequence: s2pu1

UNITYplus-400 "unity400"

Date: May 25 2020

Solvent: CDCl<sub>3</sub>

Ambient temperature

Total 32 repetitions

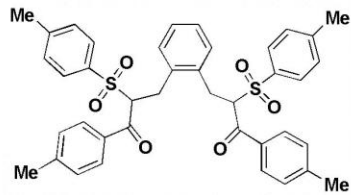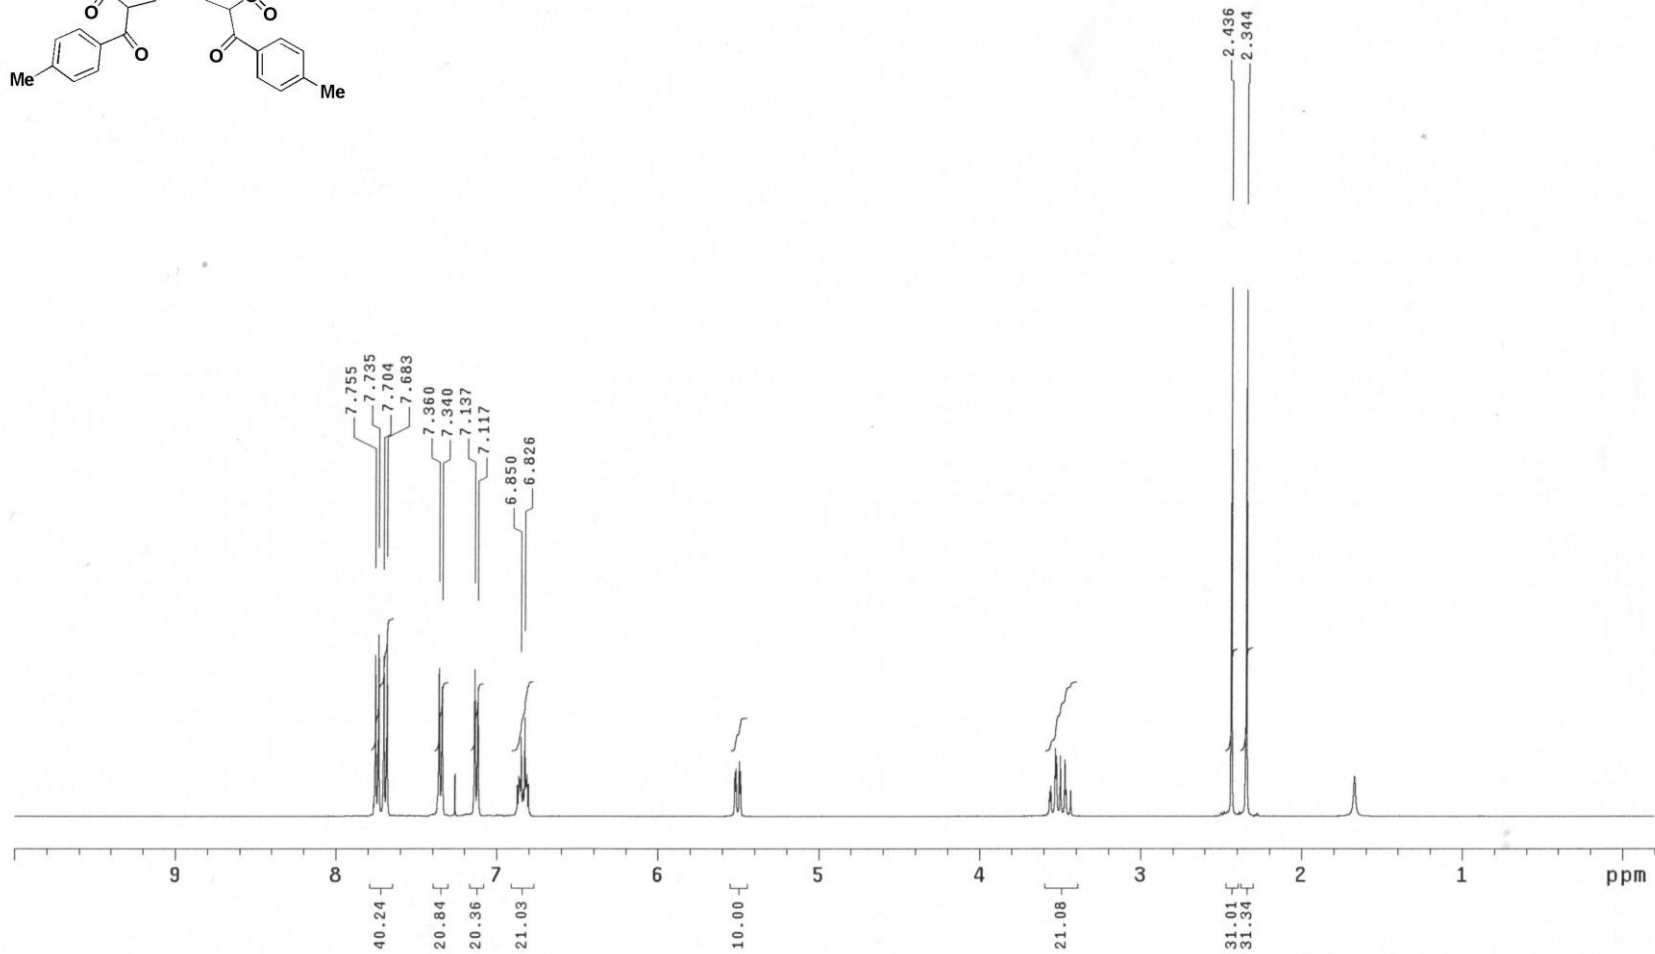



# Compound 8m-1 (<sup>13</sup>C-NMR spectral data)

KTM56

Pulse Sequence: s2pu1

UNITYplus-400 "unity400"

Date: May 25 2020

Solvent: CDCl<sub>3</sub>

Ambient temperature

Total 2256 repetitions

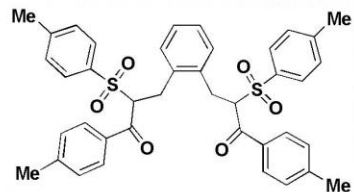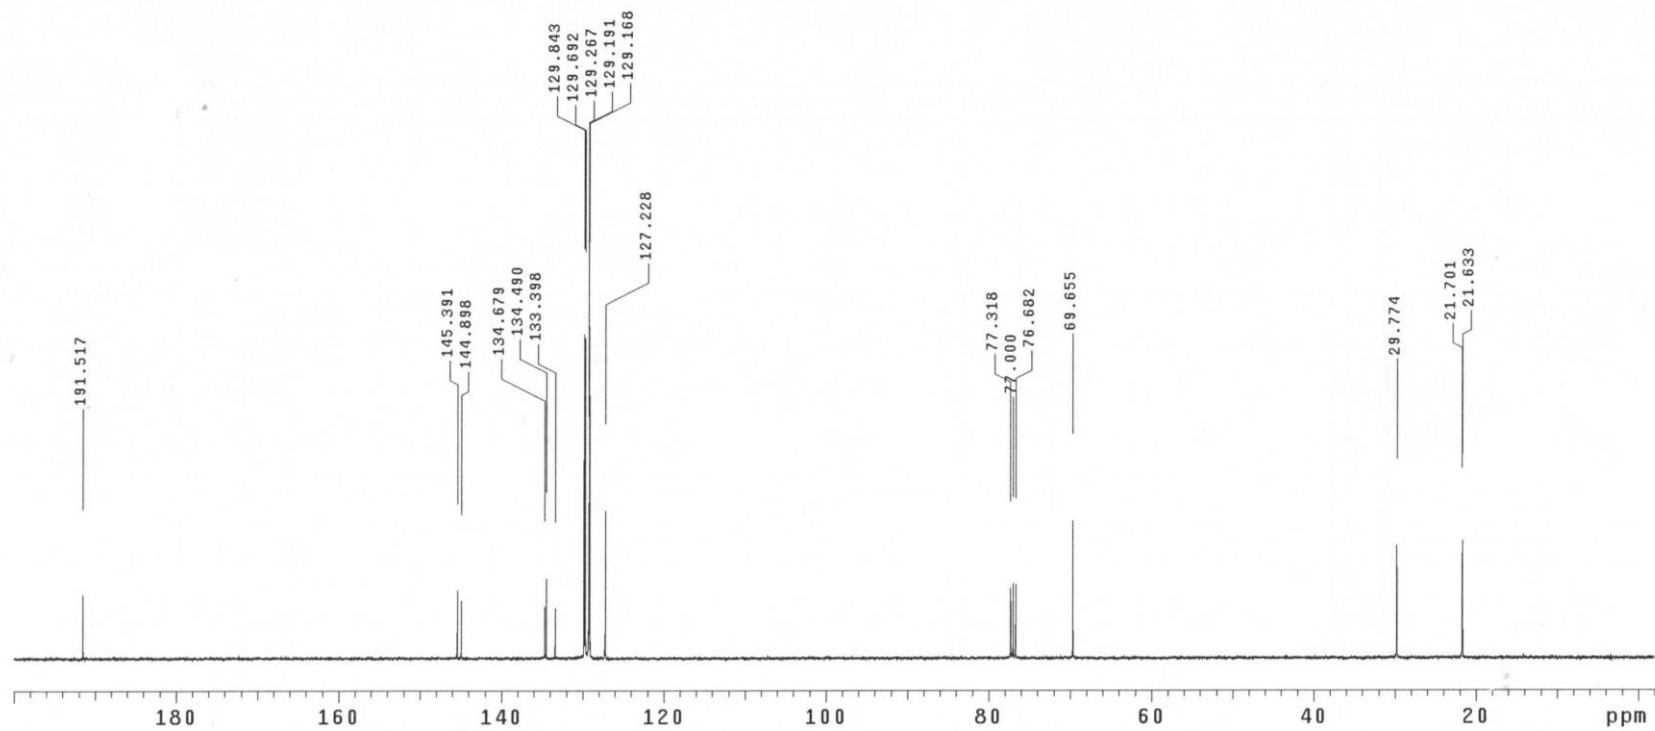

# Compound 8n (<sup>1</sup>H-NMR spectral data)

NC0610-14

Pulse Sequence: s2pu1

Solvent: CDCl<sub>3</sub>

Ambient temperature

UNITYplus-400 "unity400"

Pulse 38.8 degrees

Acq. time 3.744 sec

Width 6000.6 Hz

64 repetitions

OBSERVE H1, 400.2743812 MHz

DATA PROCESSING

FT size 65536

Total time 4 min, 0 sec

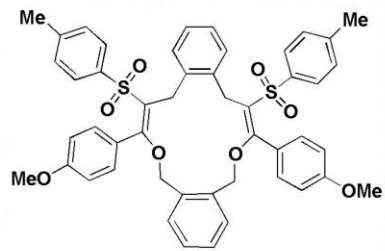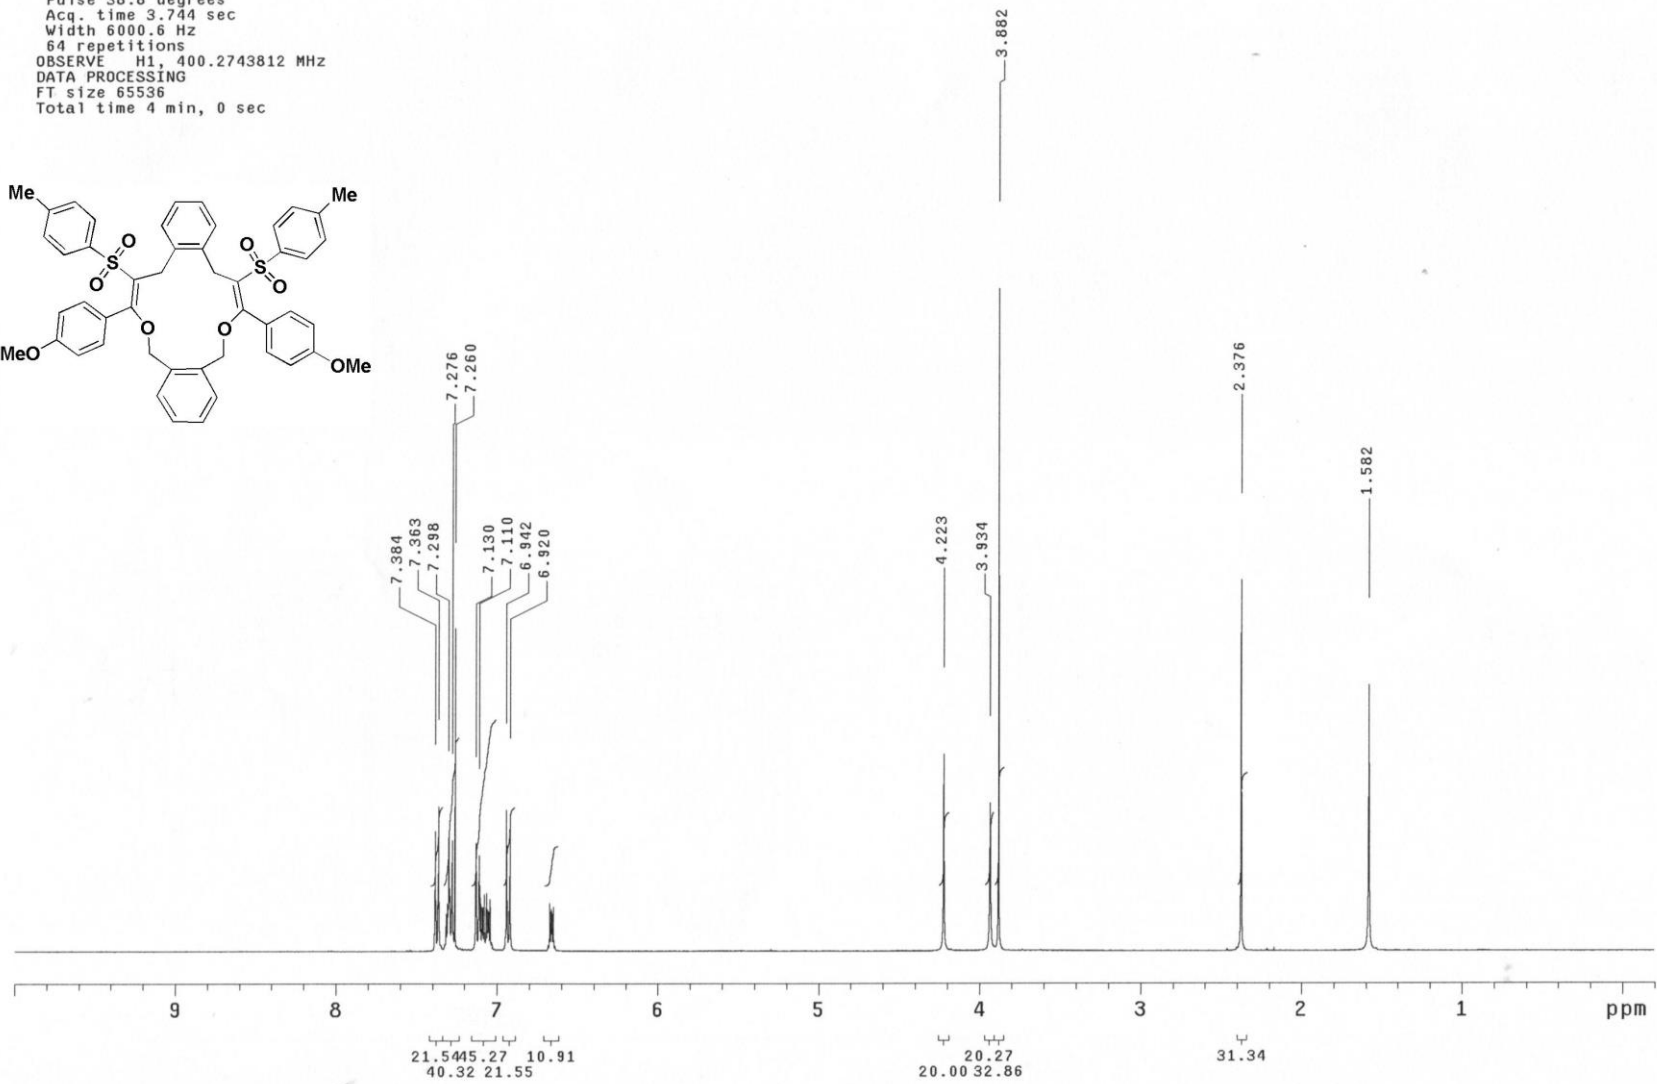

# Compound 8n (<sup>13</sup>C-NMR spectral data)

NC0610-14

Pulse Sequence: s2pu1

Solvent: CDCl<sub>3</sub>

Ambient temperature

UNITYplus-400 "unity400"

Relax. delay 0.500 sec

Pulse 65.8 degrees

Acq. time 1.000 sec

Width 25000.0 Hz

7056 repetitions

OBSERVE C13, 100.6490738 MHz

DECOUPLE H1, 400.2763980 MHz

Power 43 dB

on during acquisition

off during delay

WALTZ-16 modulated

DATA PROCESSING

Line broadening 1.0 Hz

FT size 65536

Total time 13 hr, 25 min, 47 sec

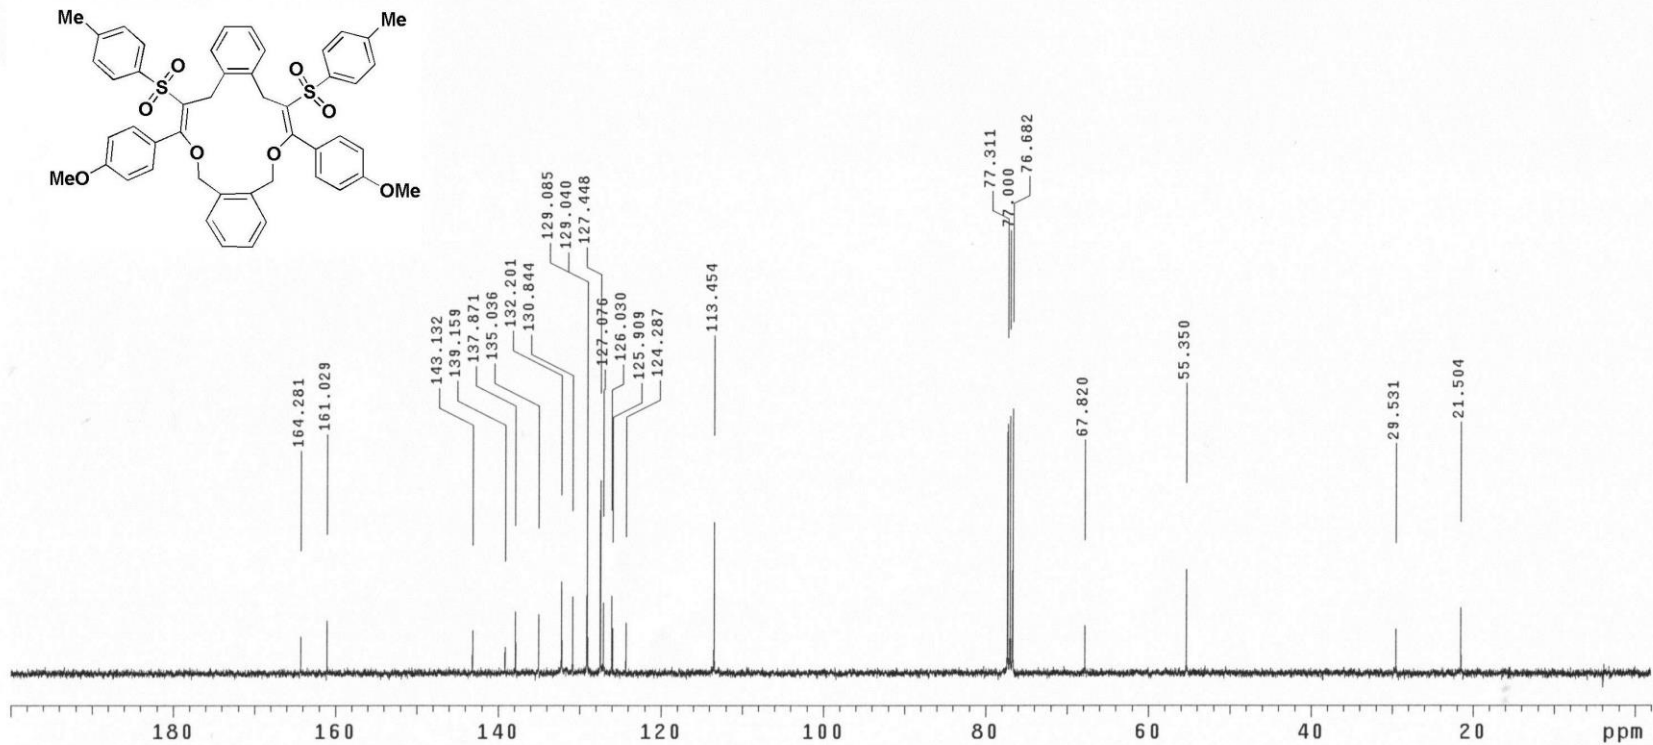

# Compound 8o (<sup>1</sup>H-NMR spectral data)

NC0723-14

Pulse Sequence: s2pu1

UNITYplus-400 "unity400"

Date: Jul 27 2020

Solvent: CDC13

Ambient temperature

Total 32 repetitions

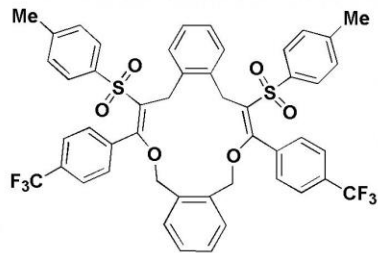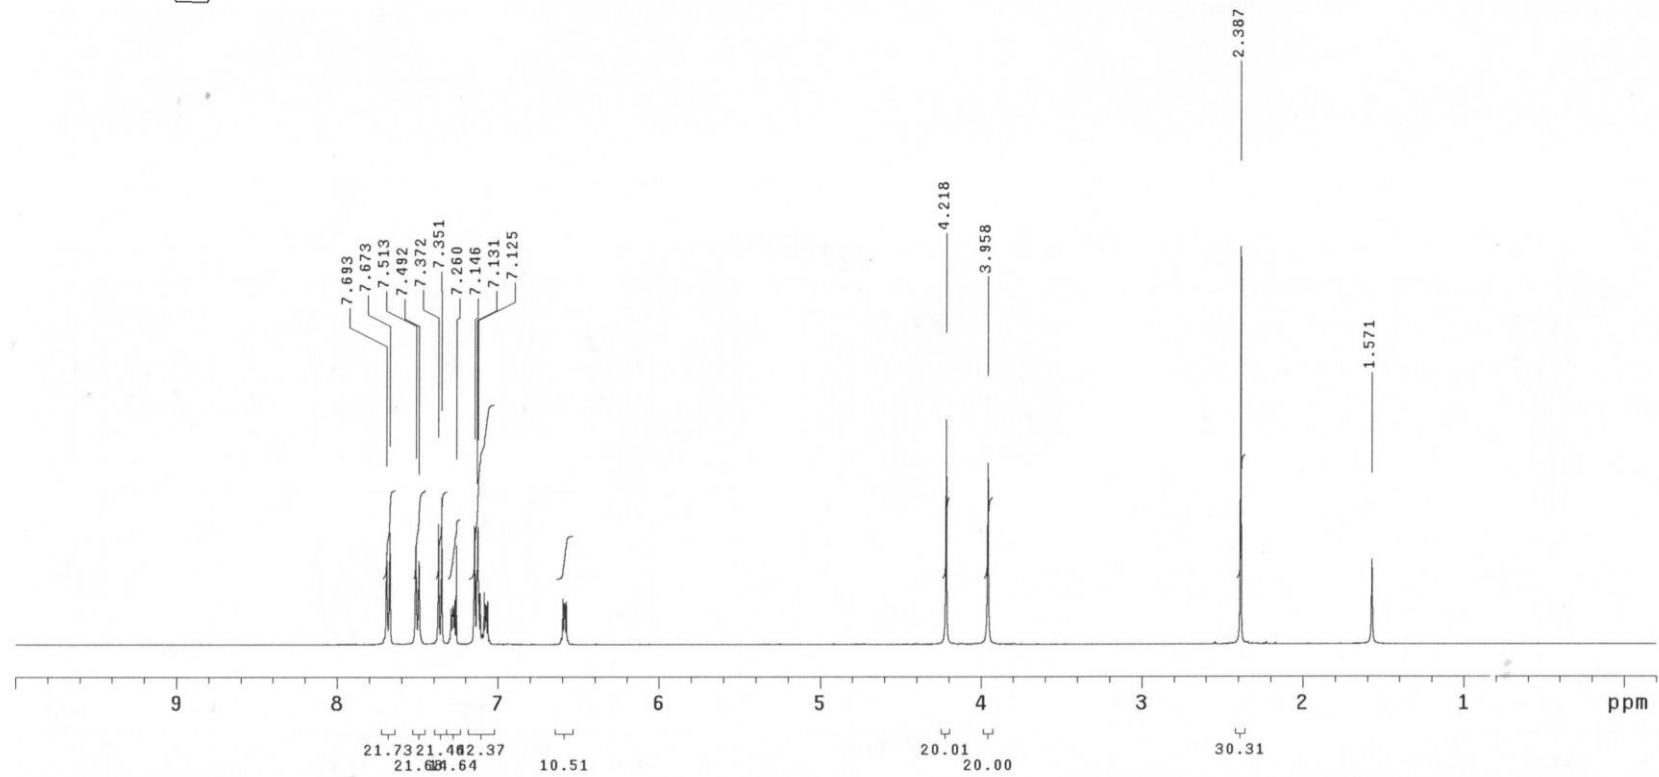

# Compound 8o (<sup>13</sup>C-NMR spectral data)

NC0723-14

Pulse Sequence: s2pu1

UNITYplus-400 "unity400"

Date: Jul 27 2020

Solvent: CDC13

Ambient temperature

Total 2336 repetitions

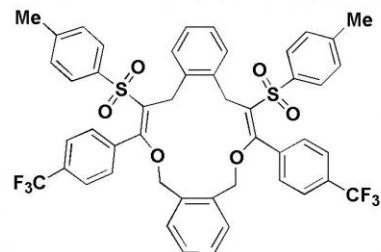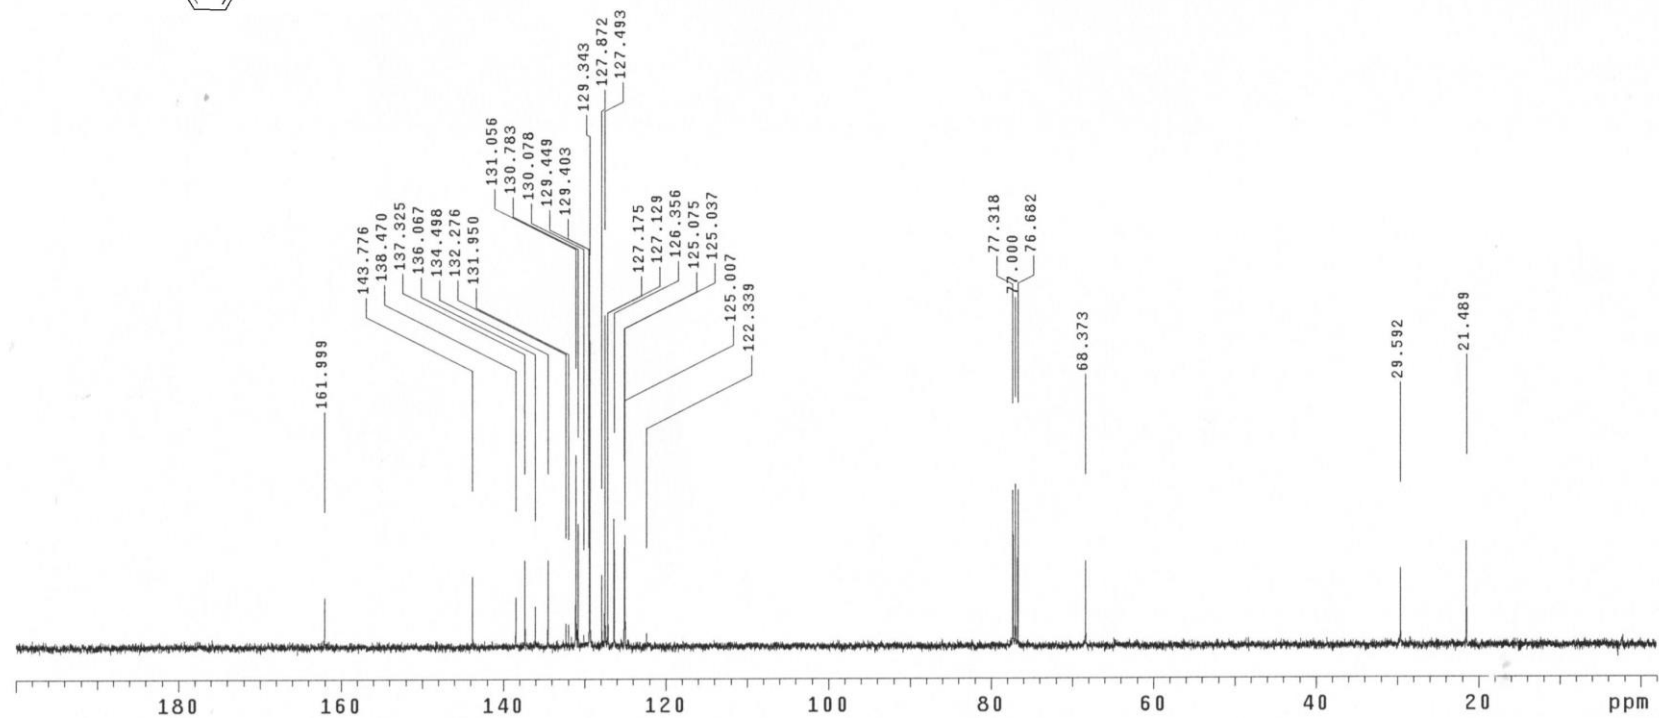

# Compound 8p (<sup>1</sup>H-NMR spectral data)

NC0615-14

Pulse Sequence: s2pu1

Solvent: CDC13

Ambient temperature

UNITYplus-400 "unity400"

Pulse 38.8 degrees

Acq. time 3.744 sec

Width 6000.6 Hz

64 repetitions

OBSERVE H1, 400.2743814 MHz

DATA PROCESSING

FT size 65536

Total time 4 min, 0 sec

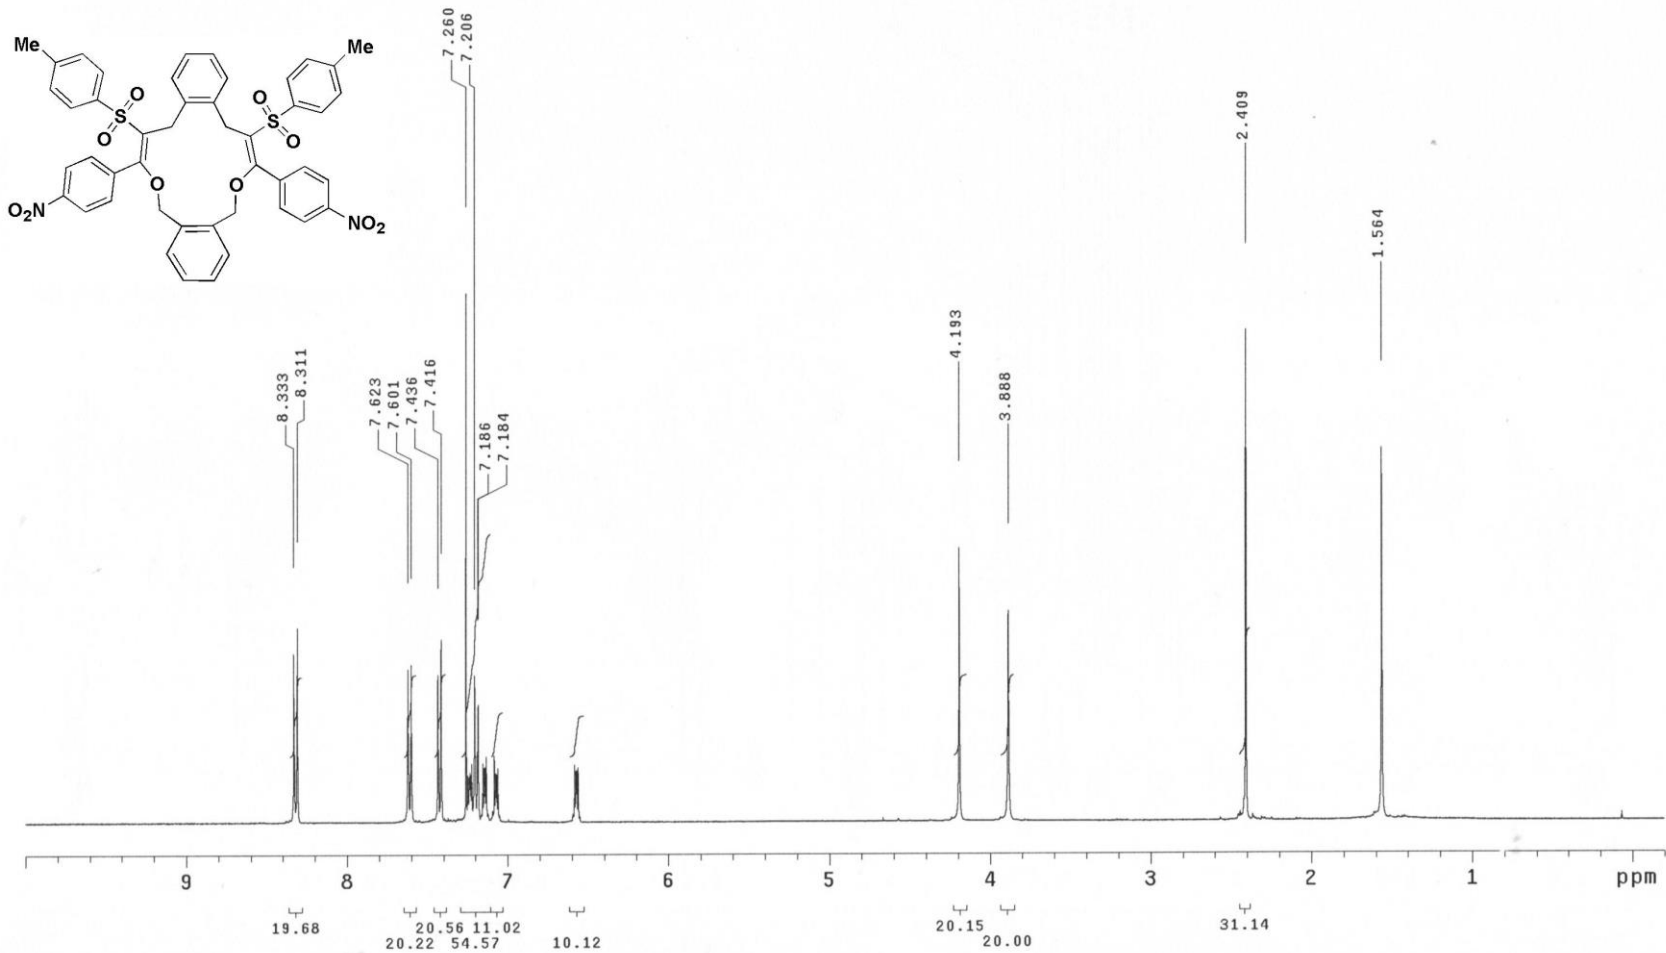

# Compound 8p (<sup>13</sup>C-NMR spectral data)

NC0615-14

Pulse Sequence: s2pu1

Solvent: CDC13

Ambient temperature

UNITYplus-400 "unity400"

Relax. delay 0.500 sec

Pulse 65.8 degrees

Acq. time 0.800 sec

Width 25000.0 Hz

7472 repetitions

OBSERVE C13, 100.6490723 MHz

DECOUPLE H1, 400.2763980 MHz

Power 43 dB

on during acquisition

off during delay

WALTZ-16 modulated

DATA PROCESSING

Line broadening 1.0 Hz

FT size 65536

Total time 11 hr, 39 min, 7 sec

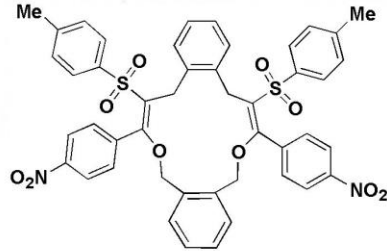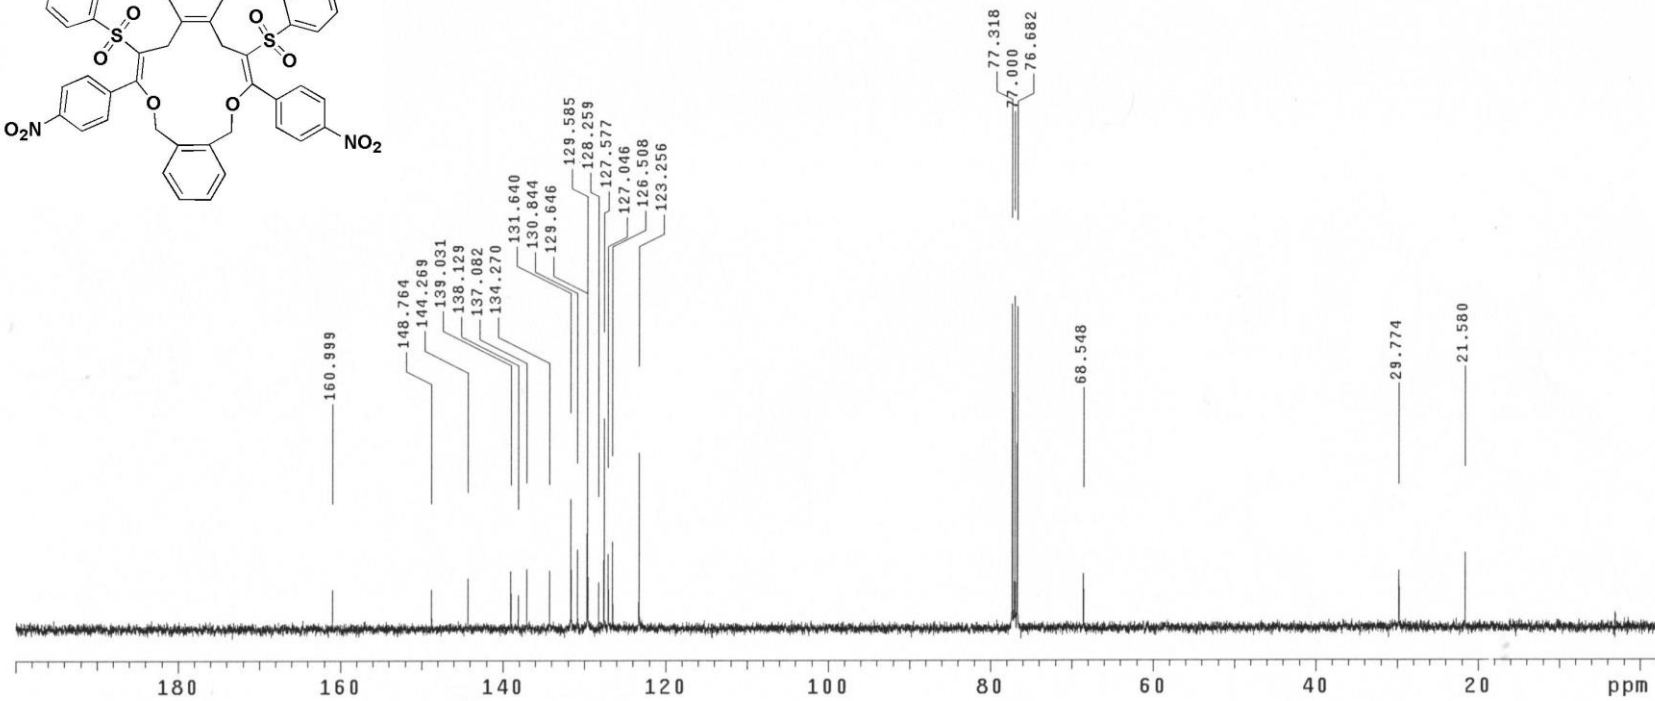

# Compound 8q (<sup>1</sup>H-NMR spectral data)

NC0630-14

Pulse Sequence: s2pu1

Solvent: CDC13

Ambient temperature

UNITYplus-400 "unity400"

Pulse 38.8 degrees

Acq. time 3.744 sec

Width 6000.6 Hz

32 repetitions

OBSERVE H1, 400.2743814 MHz

DATA PROCESSING

FT size 65536

Total time 2 min, 0 sec

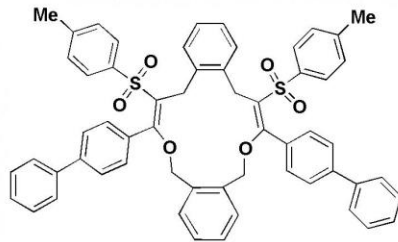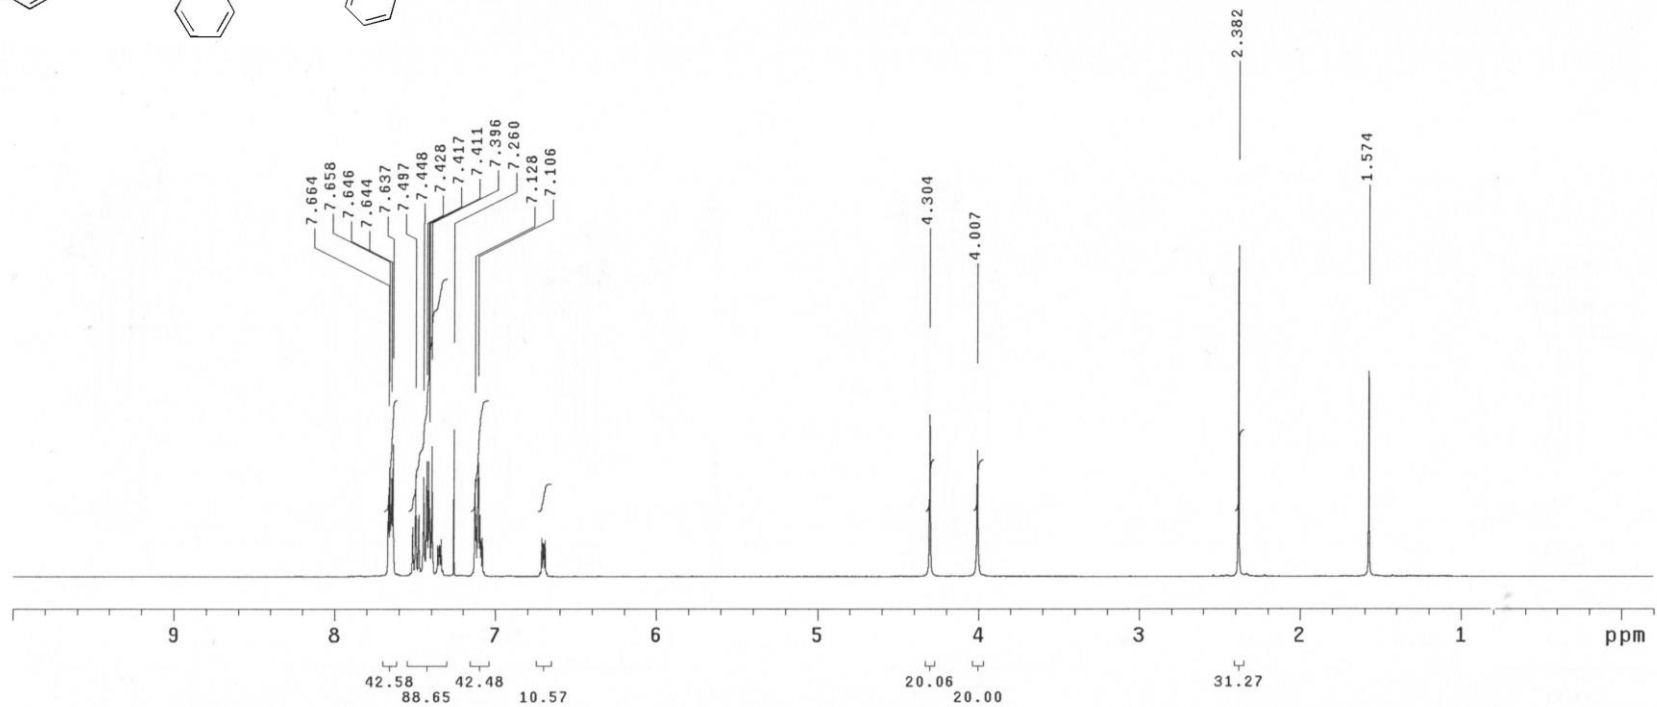



# Compound 8q (<sup>13</sup>C-NMR spectral data)

NC0630-14

Pulse Sequence: s2pu1

Solvent: CDCl<sub>3</sub>

Ambient temperature

UNITYplus-400 "unity400"

Relax. delay 0.500 sec

Pulse 65.8 degrees

Acq. time 0.800 sec

Width 25000.0 Hz

3248 repetitions

OBSERVE C13, 100.6490738 MHz

DECOUPLE H1, 400.2763980 MHz

Power 43 dB

on during acquisition

off during delay

WALTZ-16 modulated

DATA PROCESSING

Line broadening 1.0 Hz

FT size 65536

Total time 11 hr, 39 min, 7 sec

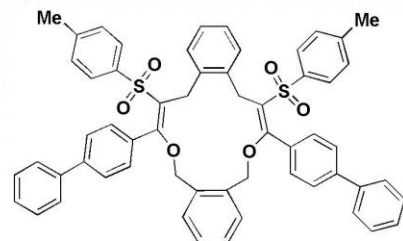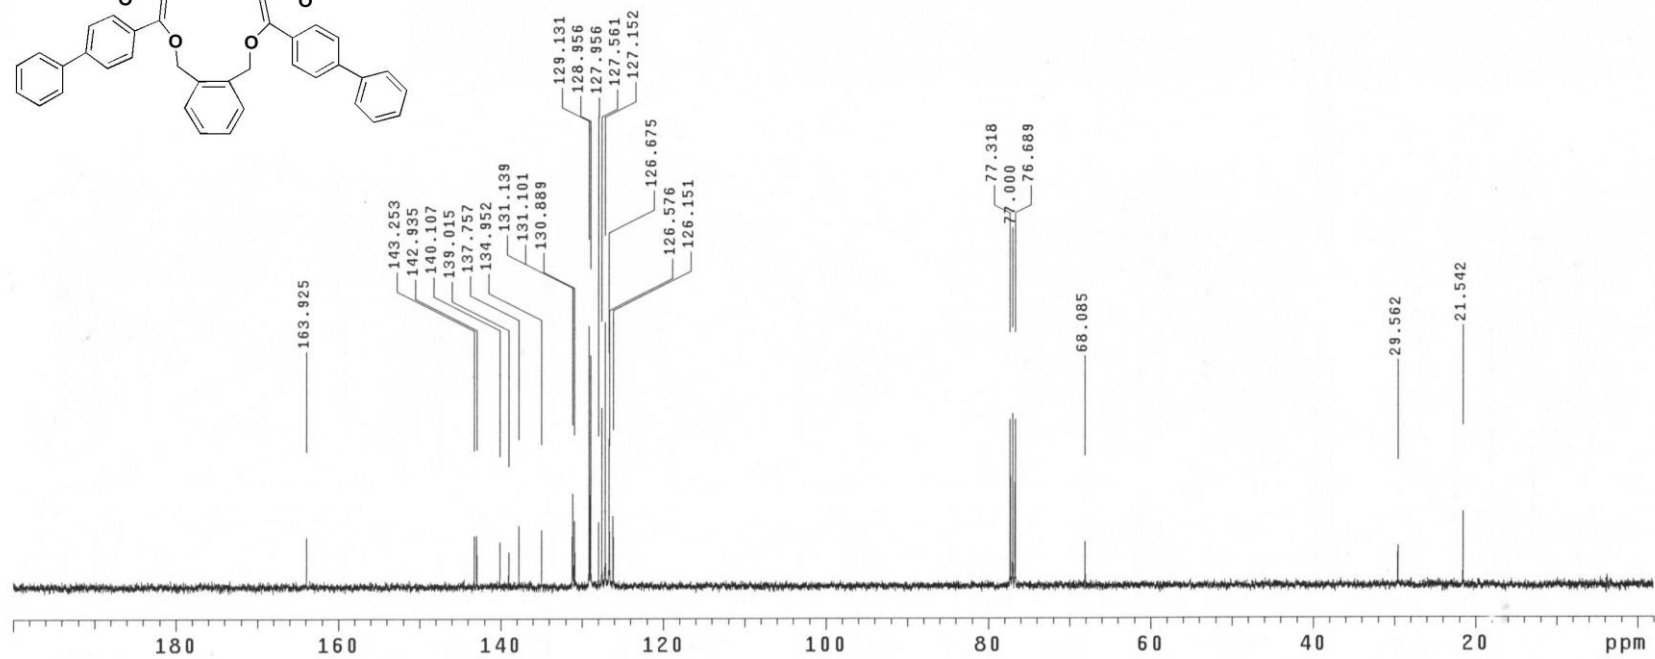

# Compound 8r (<sup>1</sup>H-NMR spectral data)

NC0616-14

Pulse Sequence: s2pu1  
UNITYplus-600 "KMU600.kmu.edu.tw"  
Date: Jun 18 2020  
Solvent: cdc13  
Temp. 28.0 C / 301.1 K  
Total 32 repetitions

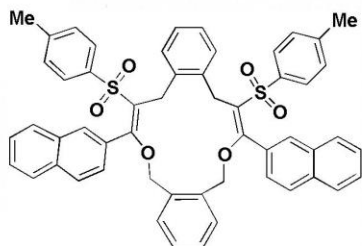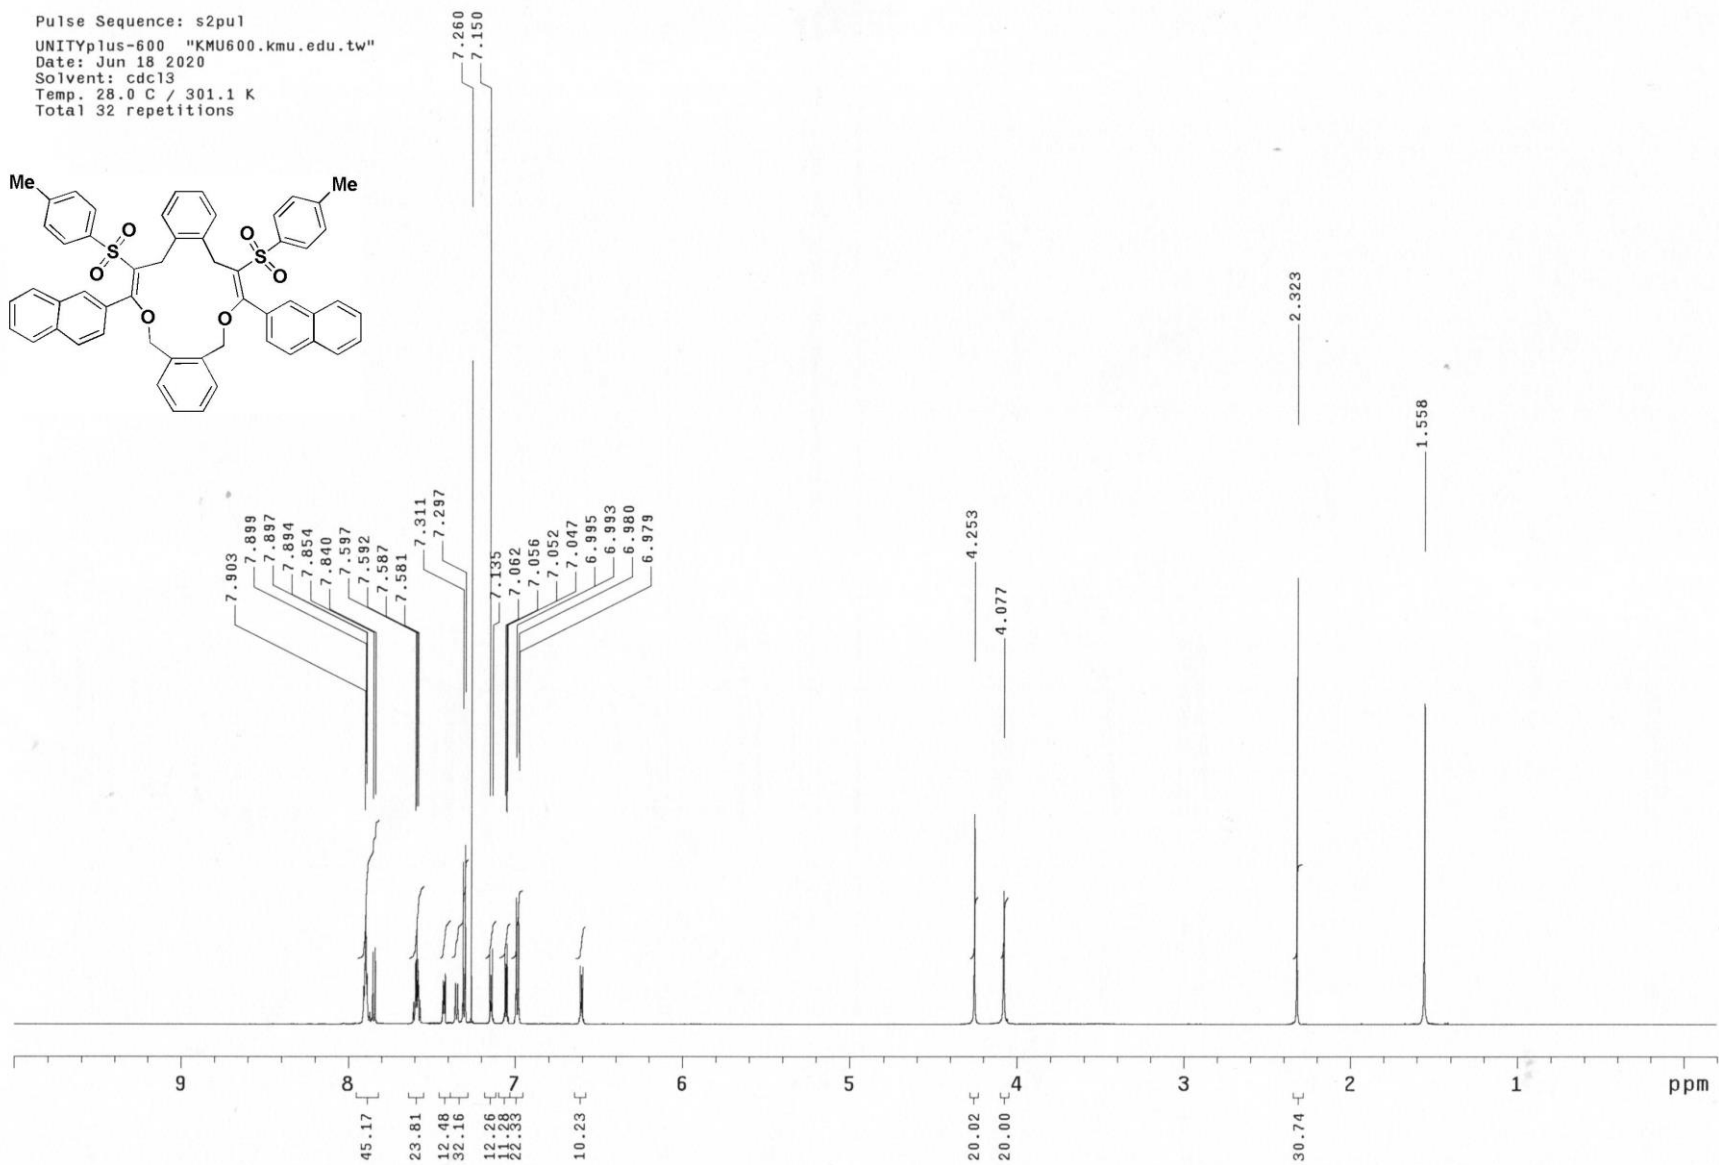

# Compound 8r (<sup>13</sup>C-NMR spectral data)

NC0616-14

Pulse Sequence: s2pu1

UNITYplus-600 "KMU600.kmu.edu.tw"

Date: Jun 18 2020

Solvent: cdcl3

Temp: 28.0 C / 301.1 K

Total 1640 repetitions

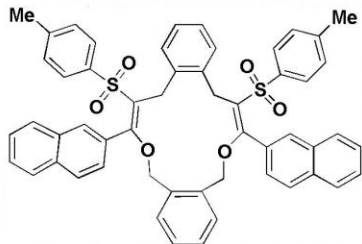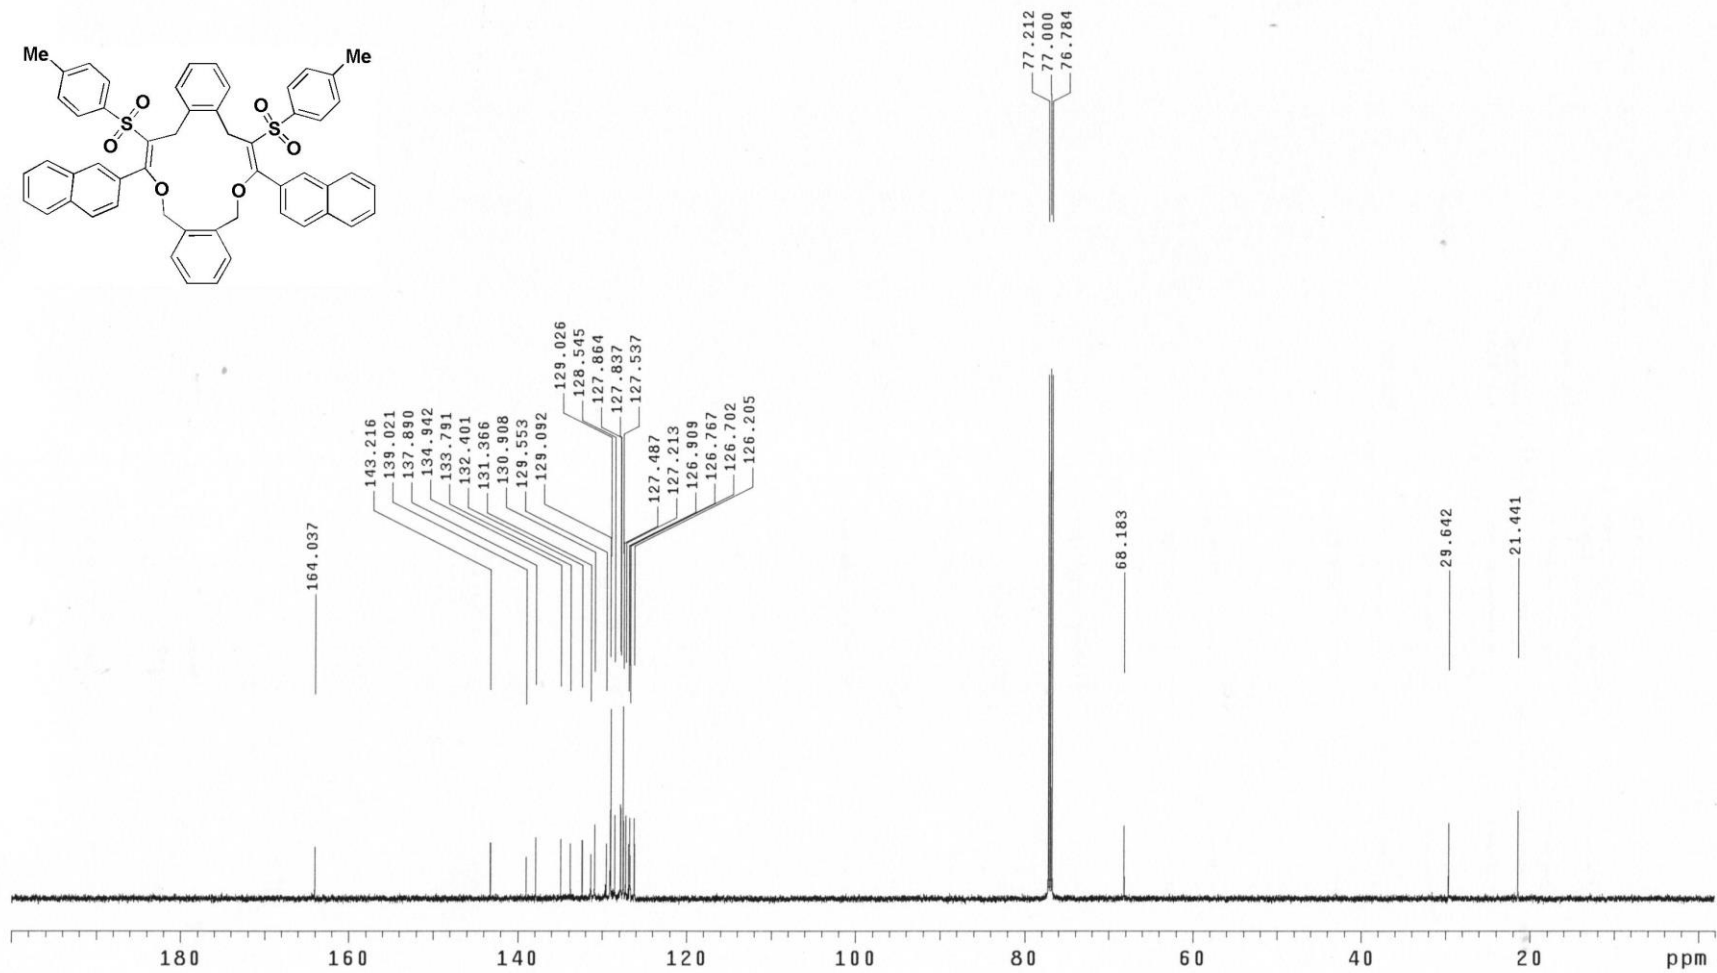

# Compound 8s (<sup>1</sup>H-NMR spectral data)

NC0728-14

Pulse Sequence: s2pu1

UNITYplus-400 "unity400"

Date: Oct 15 2020

Solvent: CDCl<sub>3</sub>

Ambient temperature

Total 32 repetitions

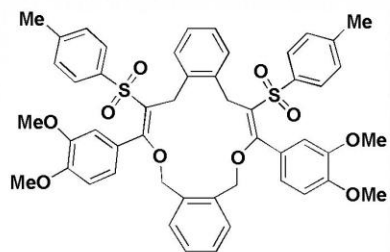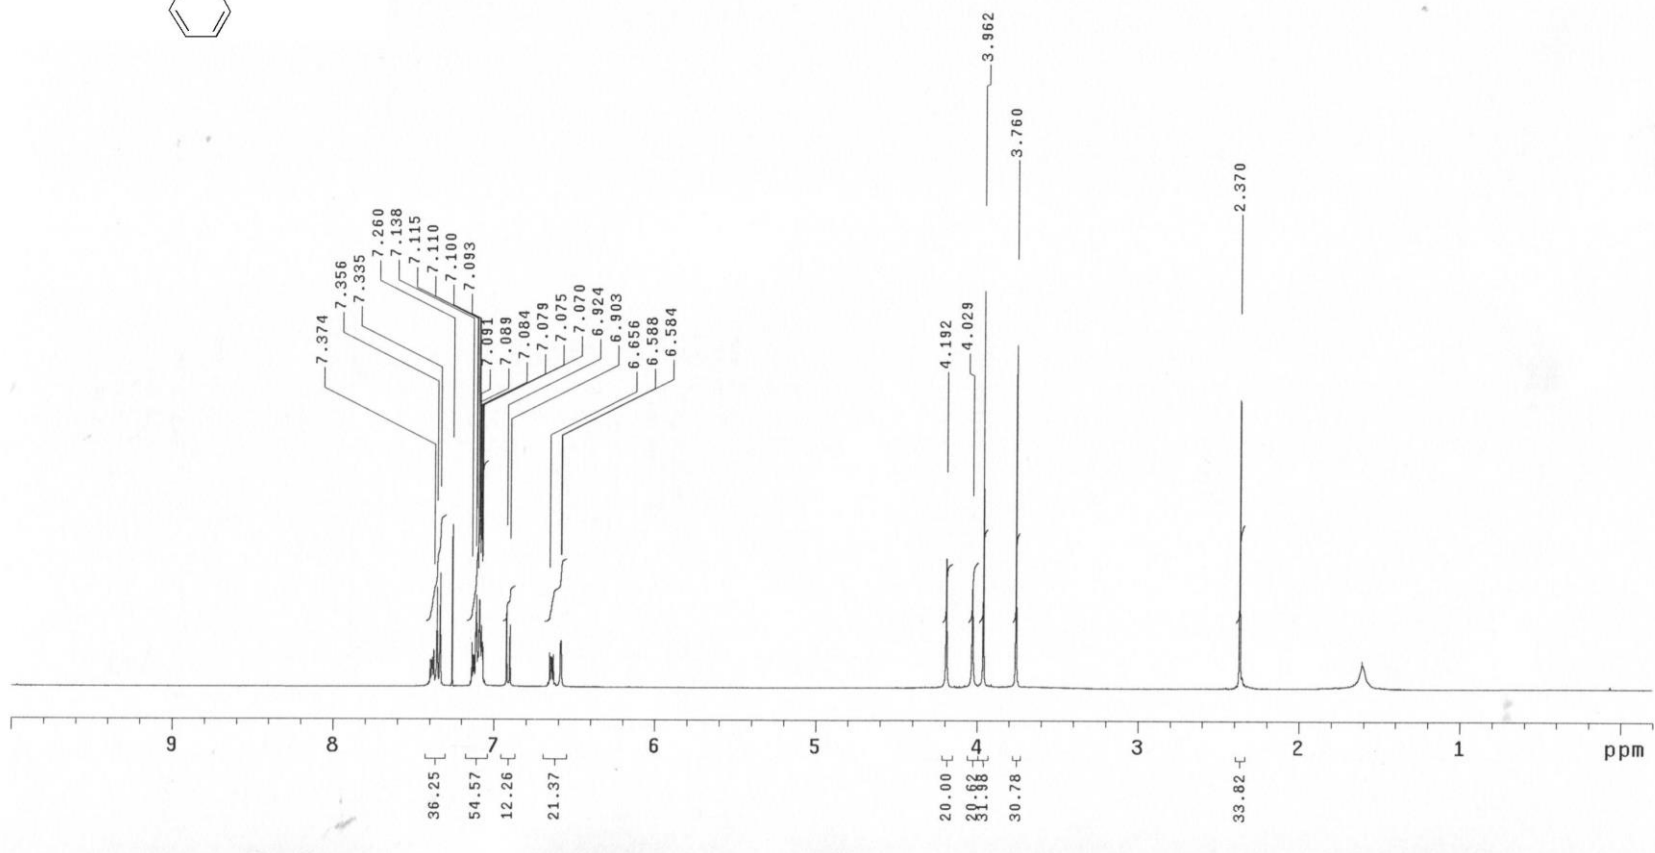

# Compound 8s (<sup>13</sup>C-NMR spectral data)

NC0728-14

Pulse Sequence: s2pu1

UNITYplus-400 "unity400"

Date: Oct 15 2020

Solvent: CDCl<sub>3</sub>

Ambient temperature

Total 5248 repetitions

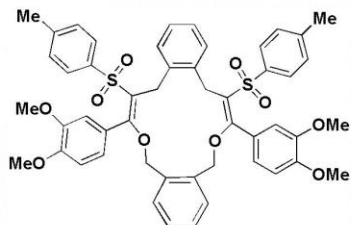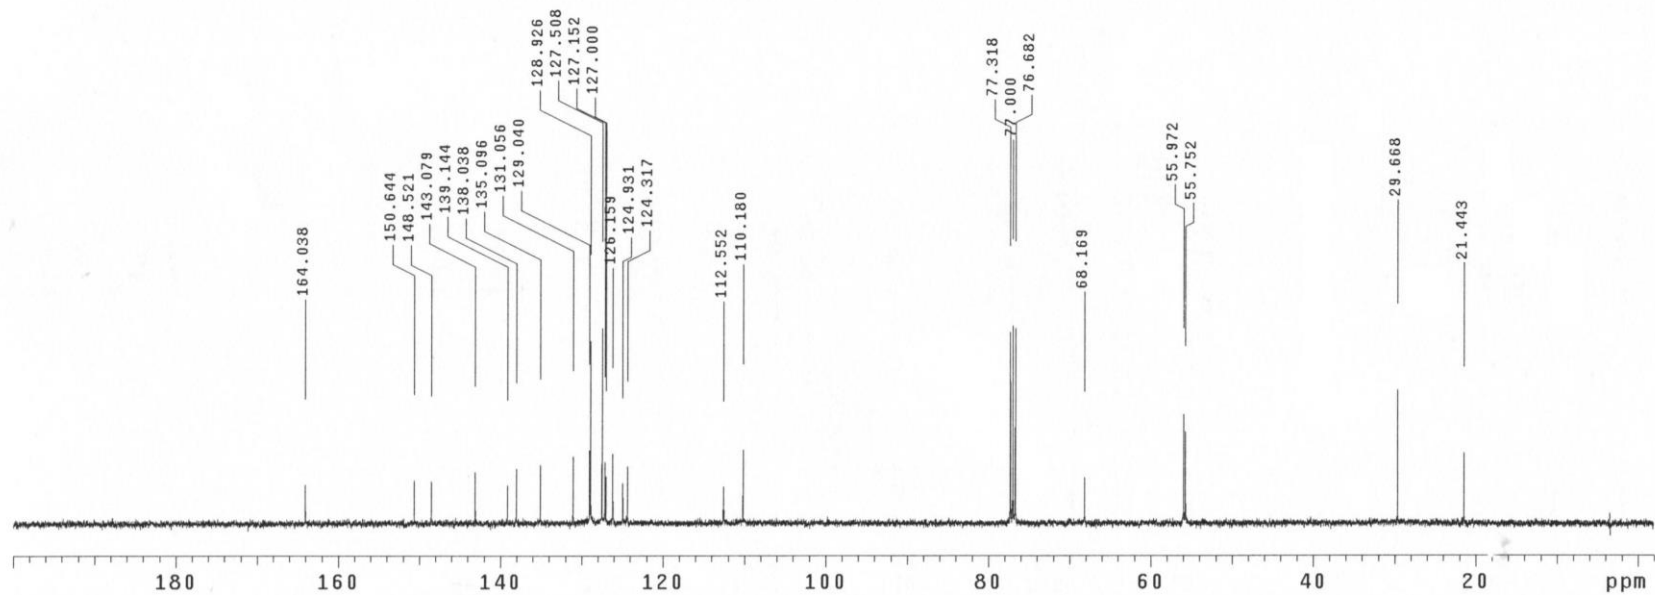

# Compound 8t (<sup>1</sup>H-NMR spectral data)

NC0724-14

Pulse Sequence: s2pu1

UNITYplus-400 "unity400"

Date: Jul 29 2020

Solvent: CDCl<sub>3</sub>

Ambient temperature

Total 32 repetitions

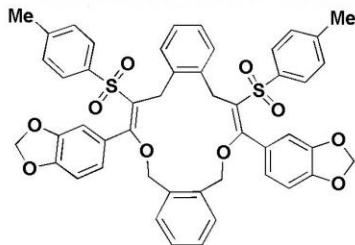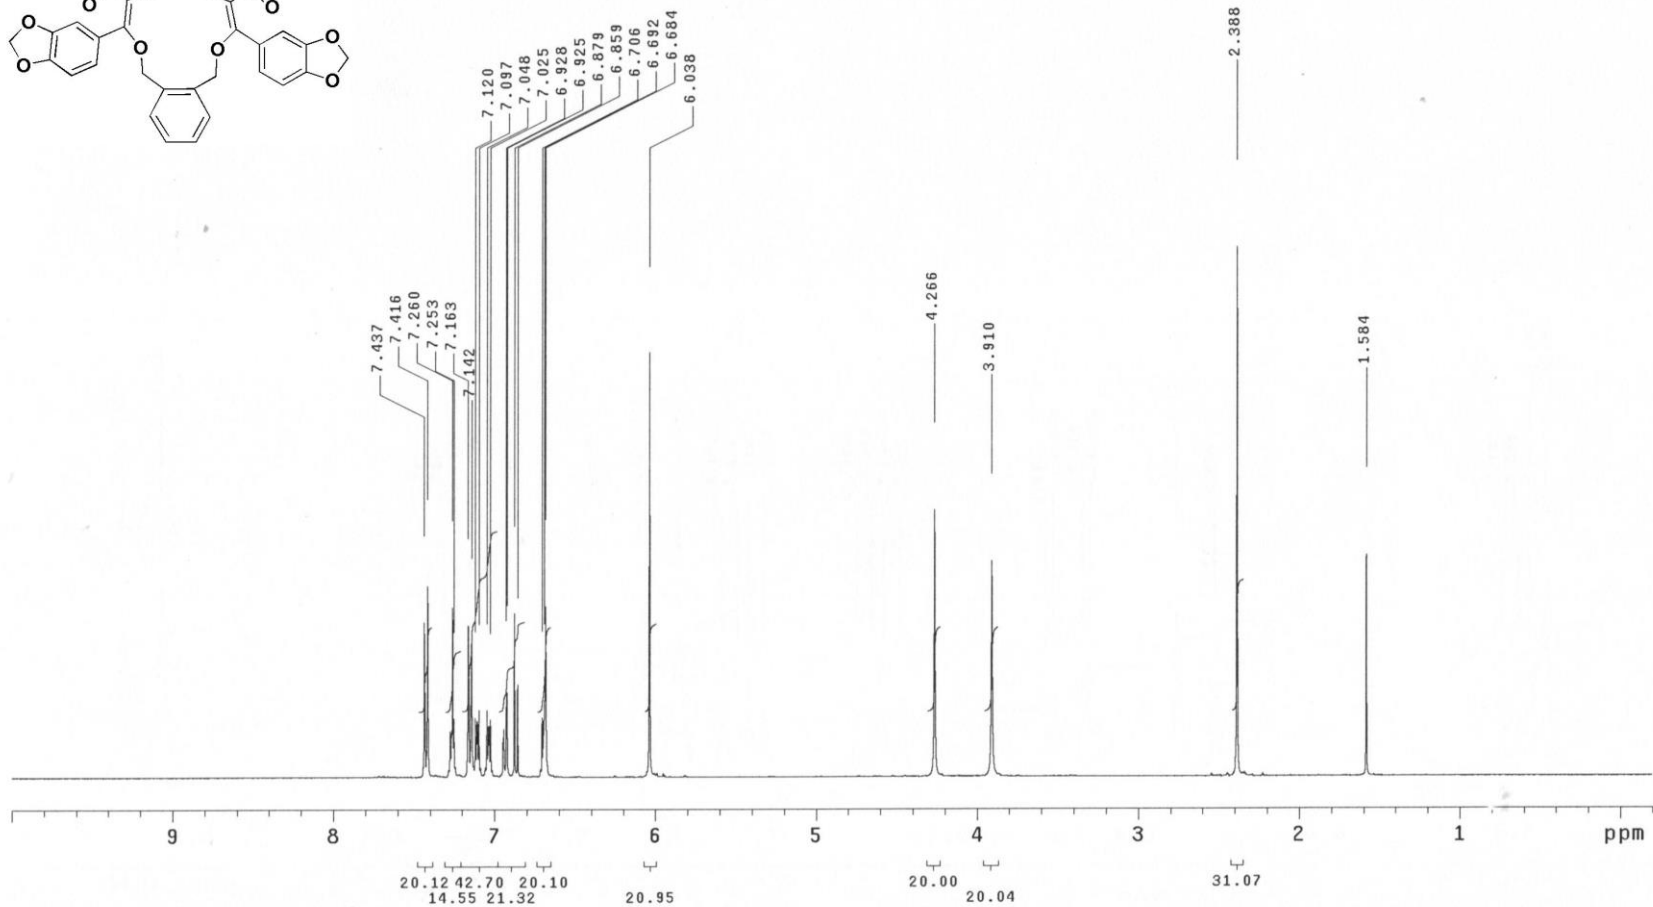

# Compound 8t (<sup>13</sup>C-NMR spectral data)

NC0724-14

Pulse Sequence: s2pu1

UNITYplus-400 "unity400"

Date: Jul 29 2020

Solvent: CDCl<sub>3</sub>

Ambient temperature

Total 1552 repetitions

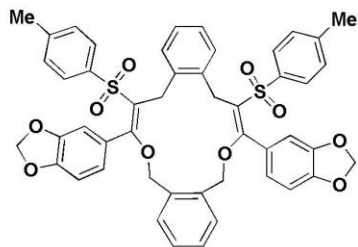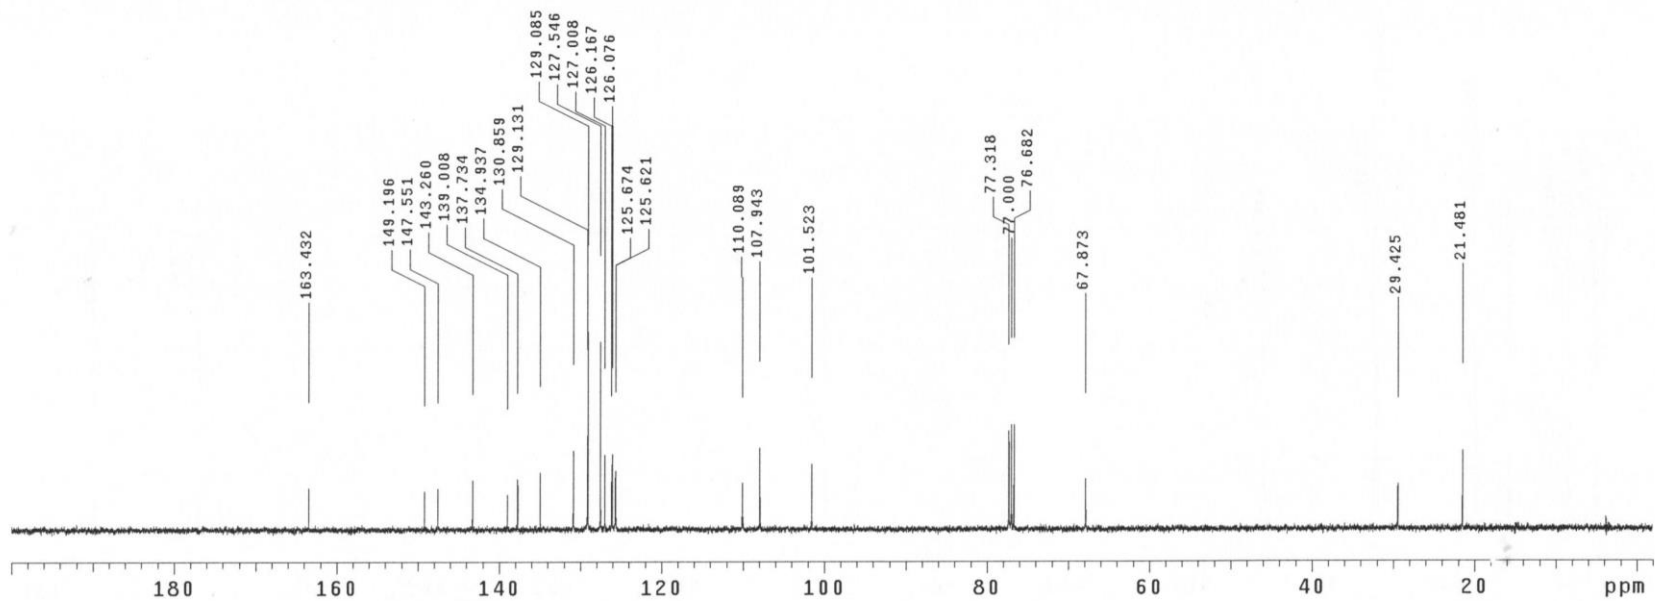

# Compound 8u (<sup>1</sup>H-NMR spectral data)

NC0714-14

Pulse Sequence: s2pu1

UNITYplus-400 "unity400"

Date: Jul 30 2020

Solvent: CDCl<sub>3</sub>

Ambient temperature

Total 32 repetitions

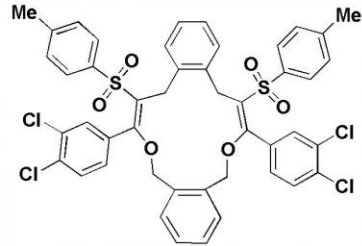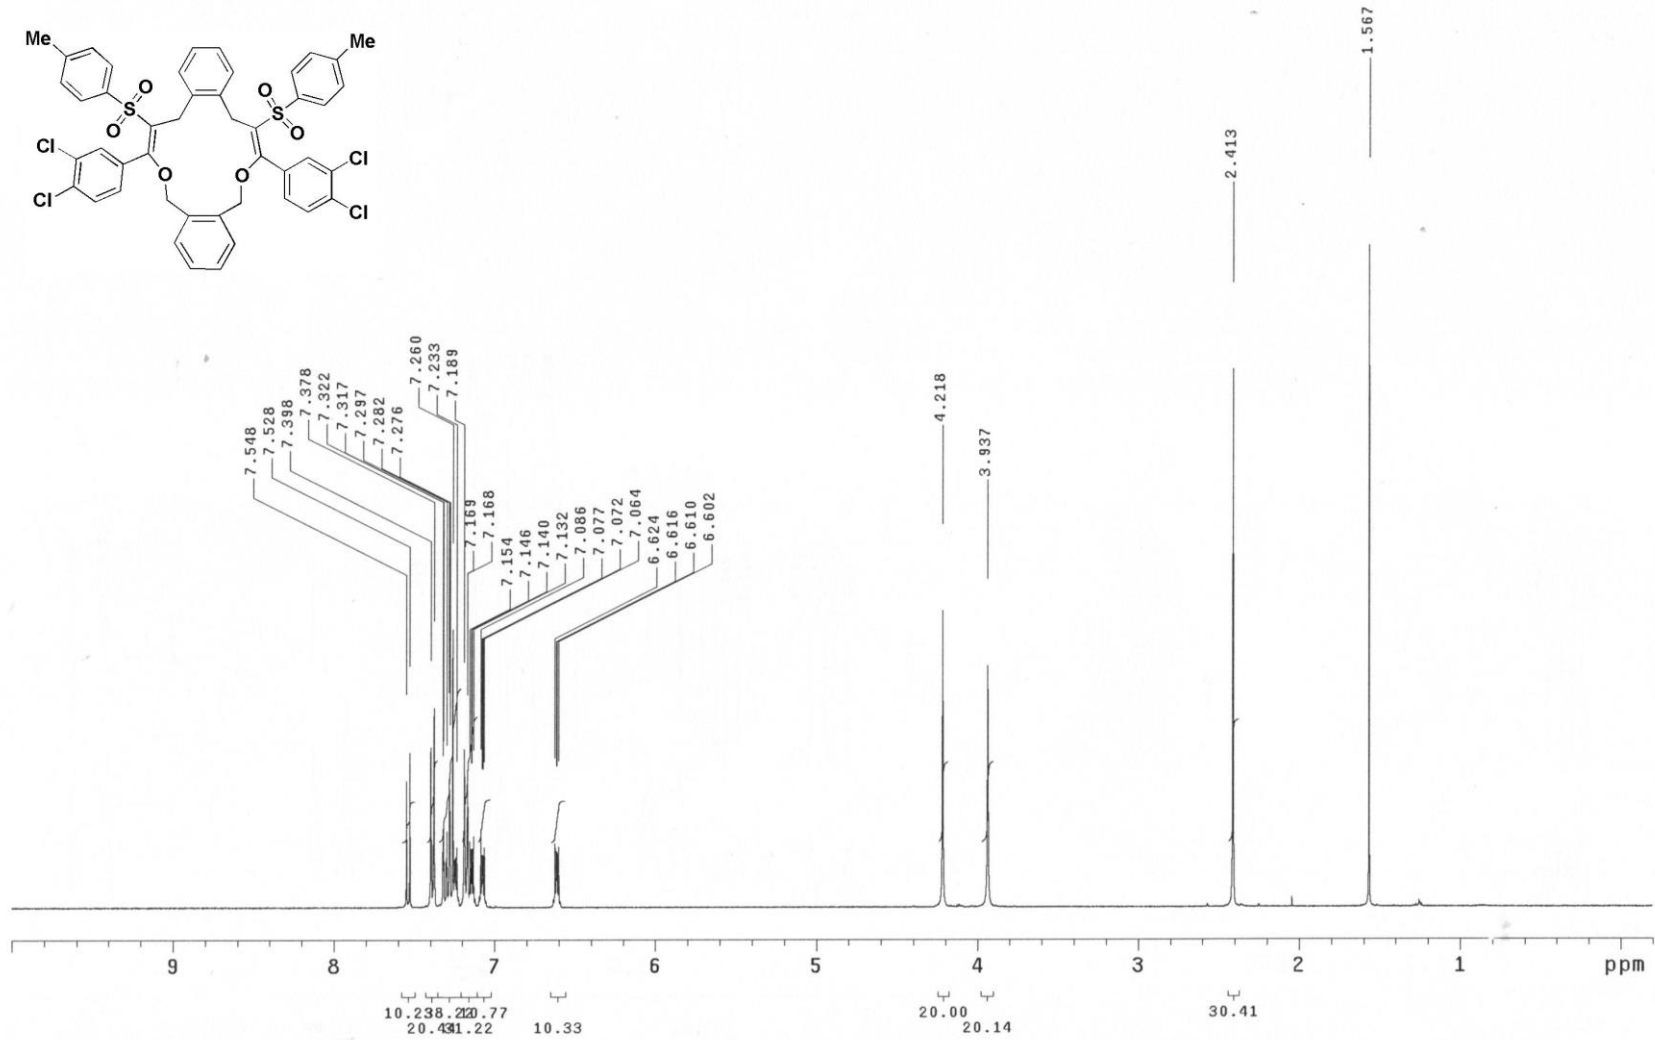



# Compound 8u (<sup>13</sup>C-NMR spectral data)

NC0714-14

Pulse Sequence: s2pu1

UNITYplus-400 "unity400"

Date: Jul 30 2020

Solvent: CDCl<sub>3</sub>

Ambient temperature

Total 3200 repetitions

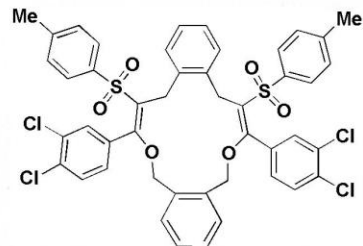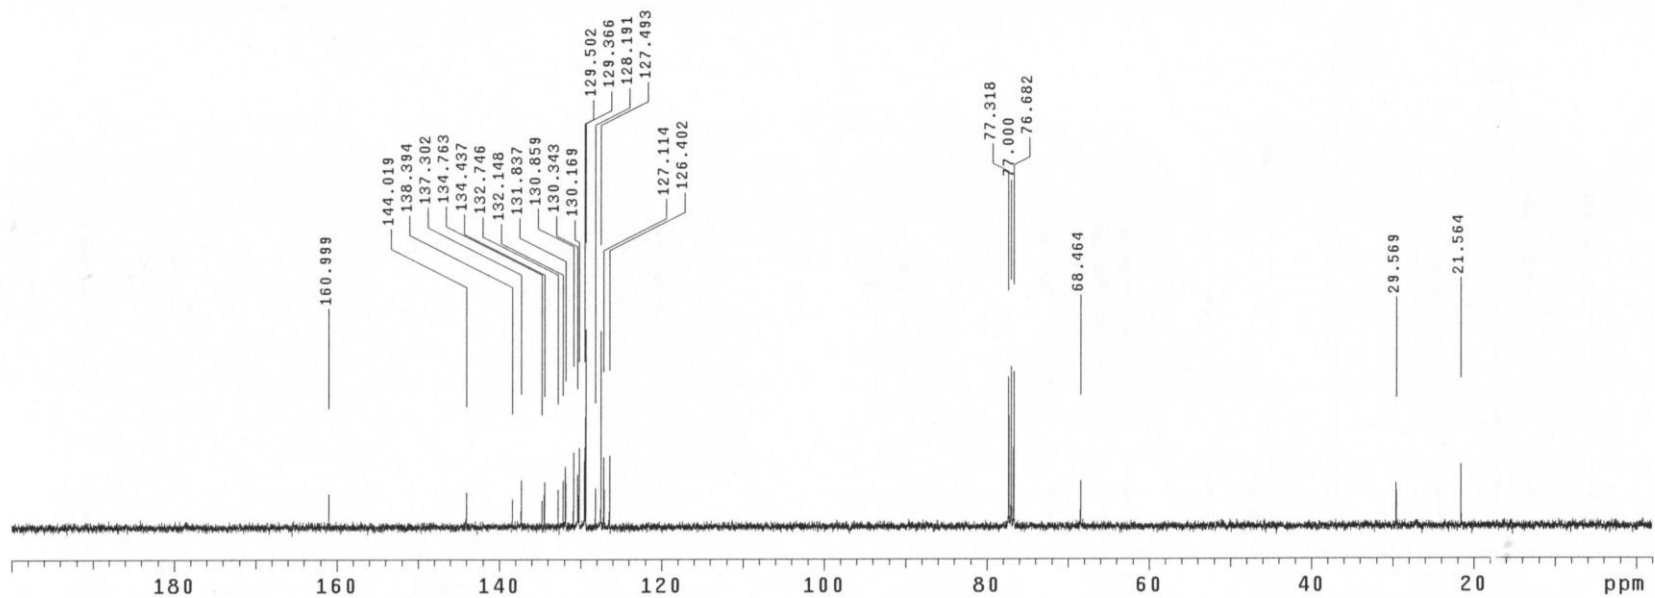

# Compound 8v (<sup>1</sup>H-NMR spectral data)

NC0730-14

Pulse Sequence: s2pu1

UNITYplus-400 "unity400"

Date: Aug 12 2020

Solvent: CDC13

Ambient temperature

Total 32 repetitions

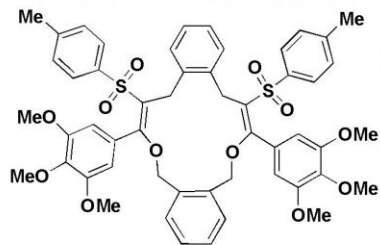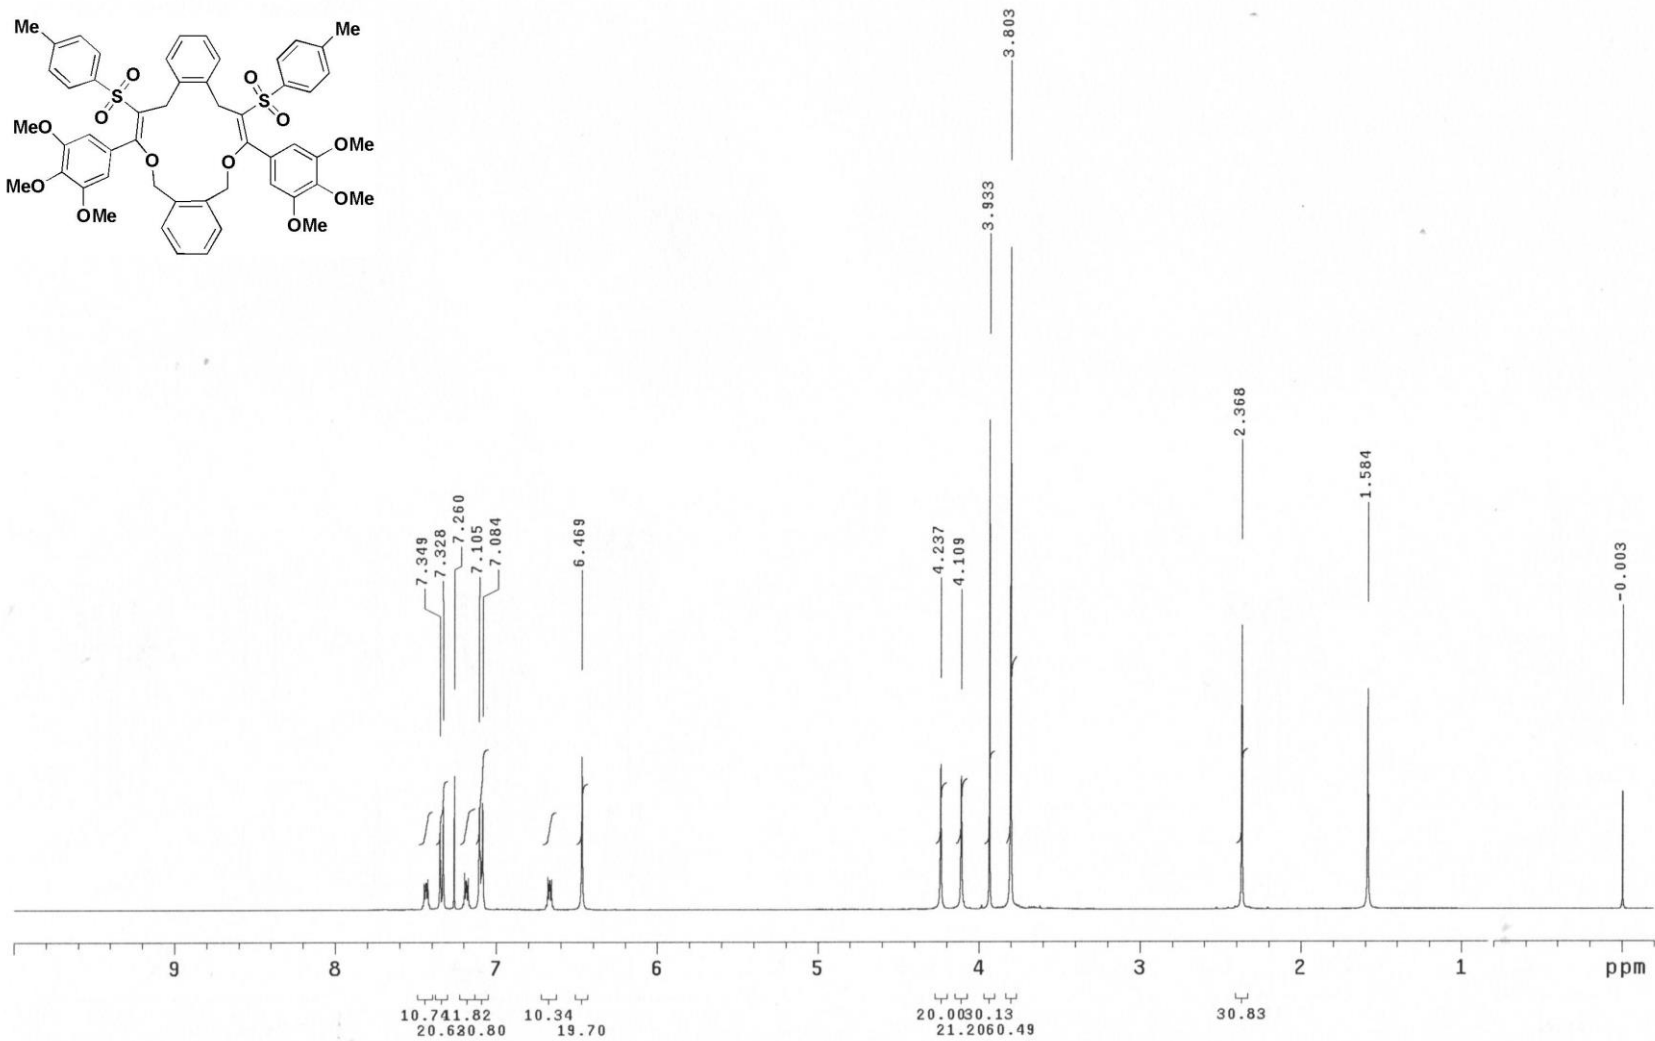

# Compound 8v (<sup>13</sup>C-NMR spectral data)

NC0730-14

Pulse Sequence: s2pu1  
UNITYplus-400 "unity400"  
Date: Aug 12 2020  
Solvent: CDC13  
Ambient temperature  
Total 32000 repetitions

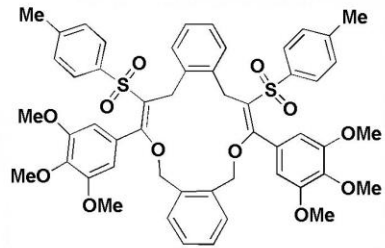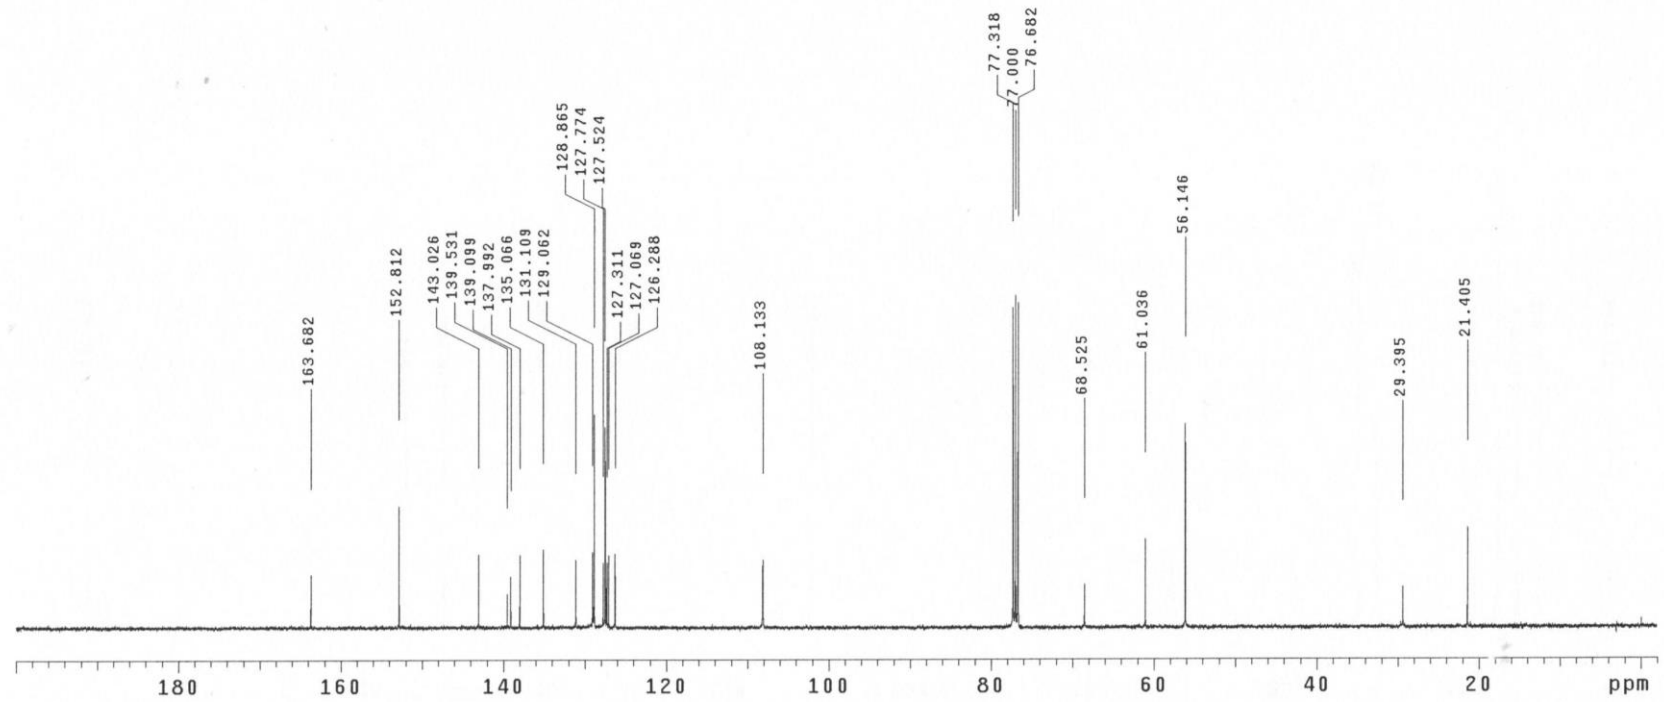

# Compound 8w (<sup>1</sup>H-NMR spectral data)

NC0804-14

Pulse Sequence: s2pu1

UNITYplus-400 "unity400"

Date: Aug 28 2020

Solvent: CDC13

Ambient temperature

Total 64 repetitions

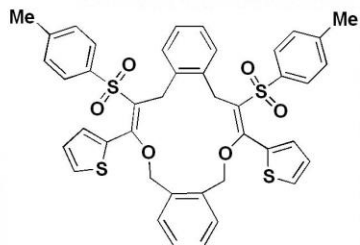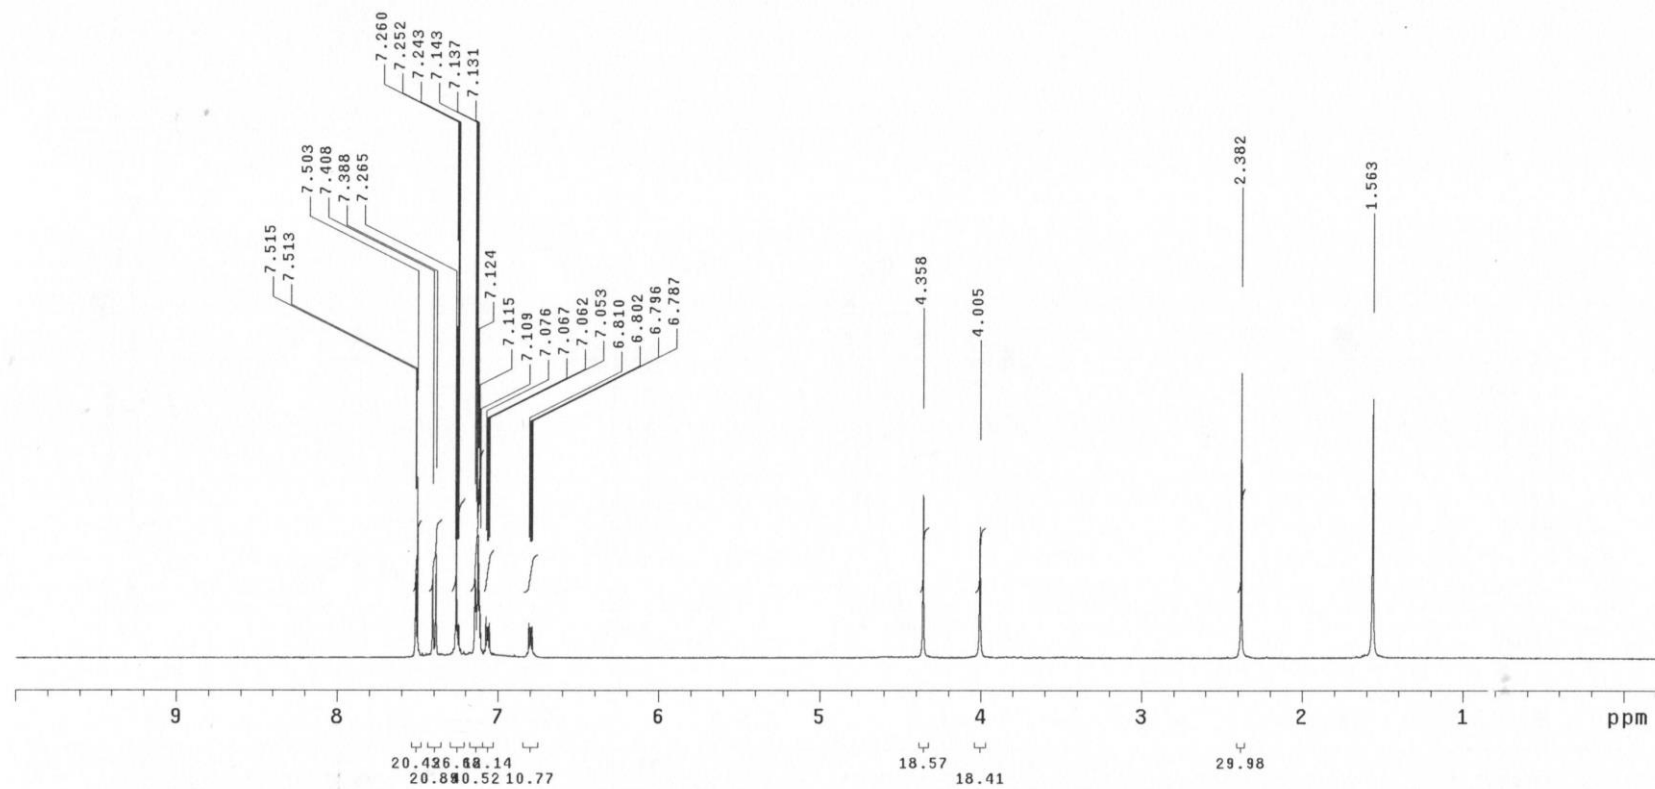

# Compound 8w (<sup>13</sup>C-NMR spectral data)

NC0804-14

Pulse Sequence: s2pu1

UNITYplus-400 "unity400"

Date: Aug 28 2020

Solvent: CDCl<sub>3</sub>

Ambient temperature

Total 10096 repetitions

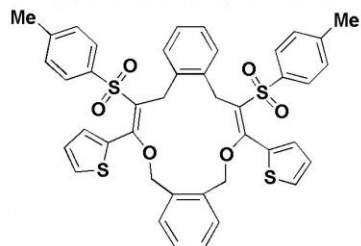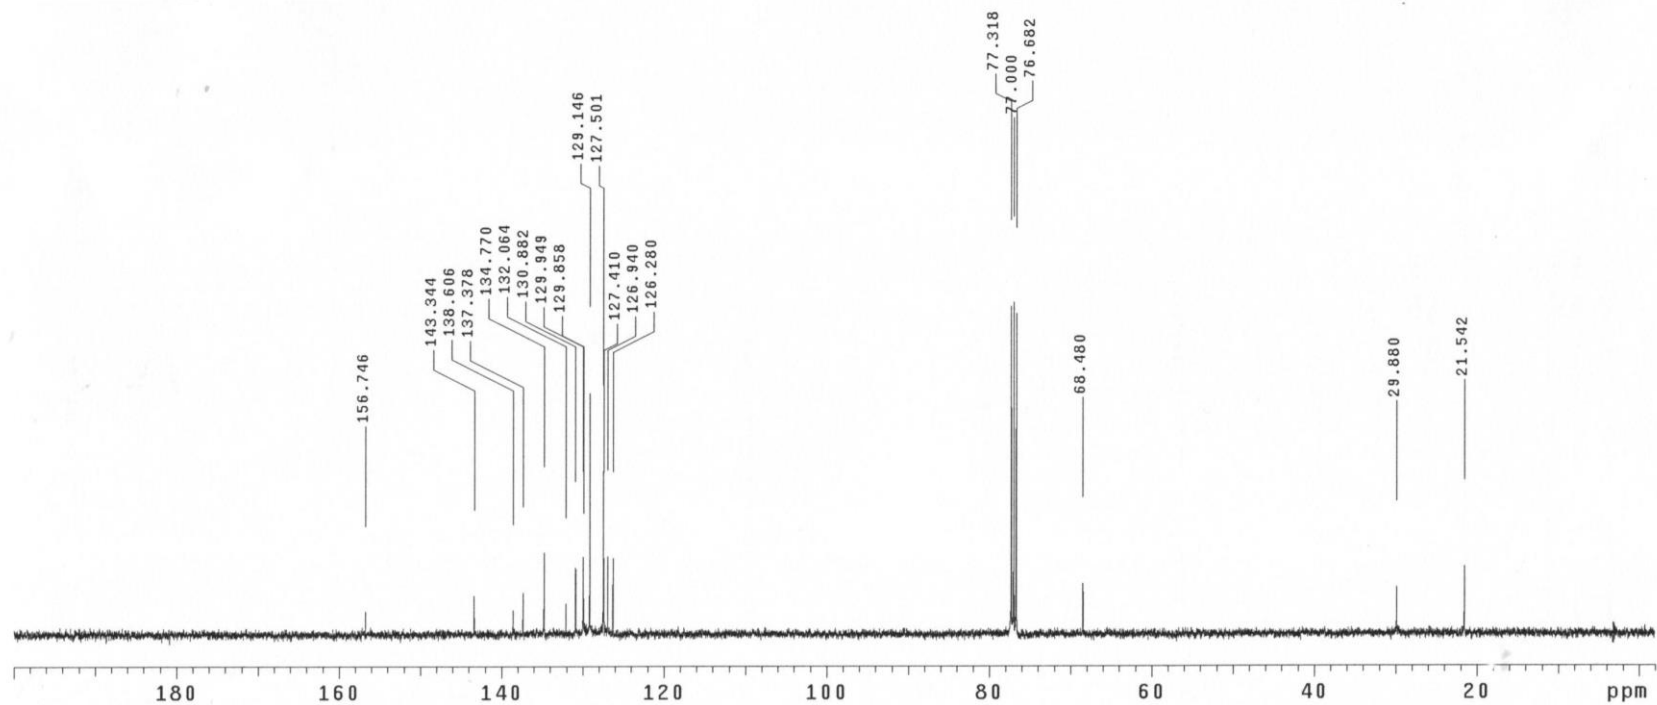

# Compound 8x (<sup>1</sup>H-NMR spectral data)

NC0805-14

Pulse Sequence: s2pu1  
Mercury-400BB "MerPlus400"  
Date: Oct 29 2020  
Solvent: cdc13  
Ambient temperature  
Total 64 repetitions

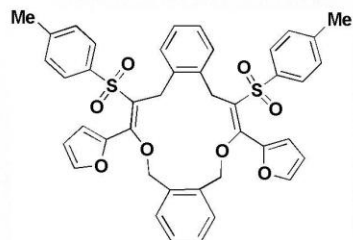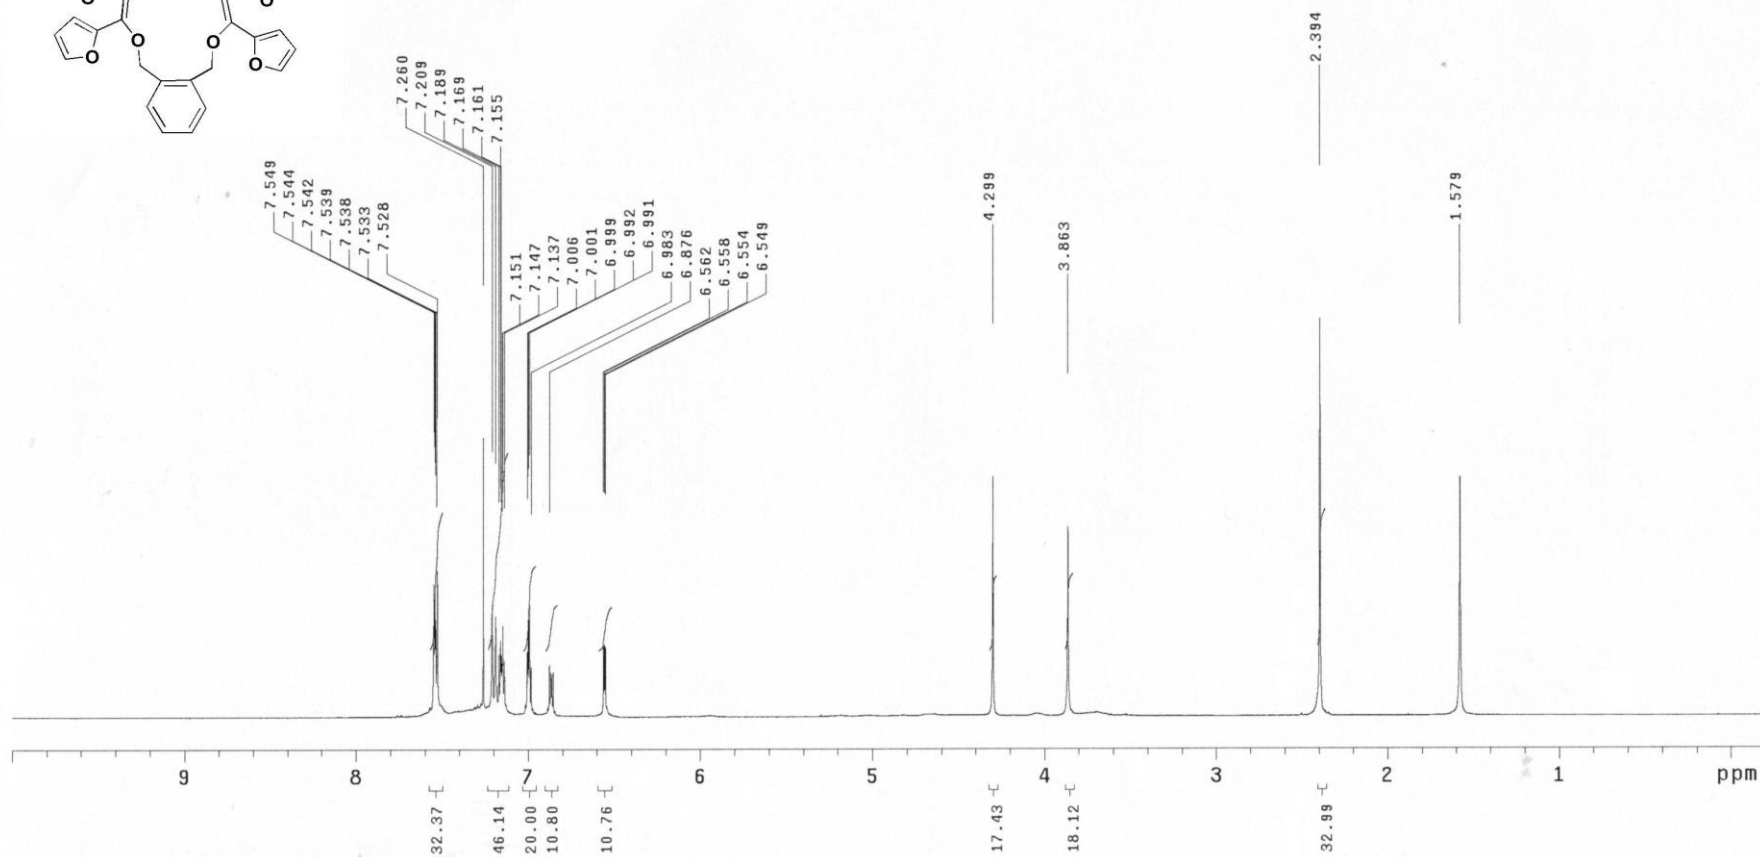



# Compound 8y (<sup>1</sup>H-NMR spectral data)

NC0820-14

Pulse Sequence: s2pu1

UNITYplus-400 "unity400"

Date: Aug 24 2020

Solvent: CDCl<sub>3</sub>

Ambient temperature

Total 32 repetitions

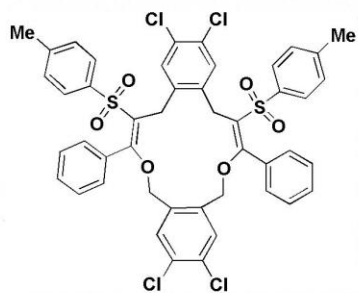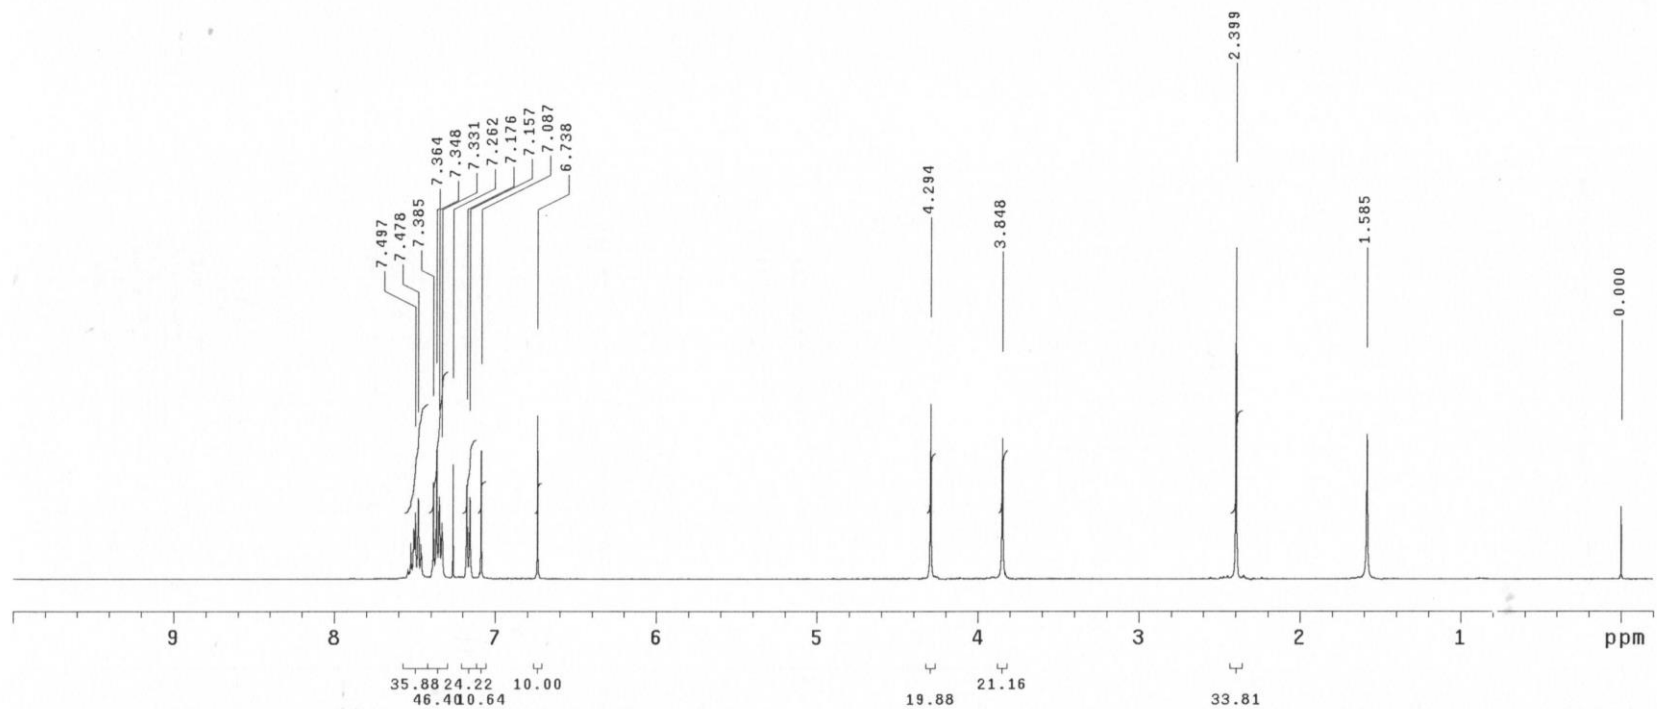



# Compound 8y (<sup>13</sup>C-NMR spectral data)

NC0820-14

Pulse Sequence: s2pu1

UNITYplus-400 "unity400"

Date: Aug 24 2020

Solvent: CDCl<sub>3</sub>

Ambient temperature

Total 1456 repetitions

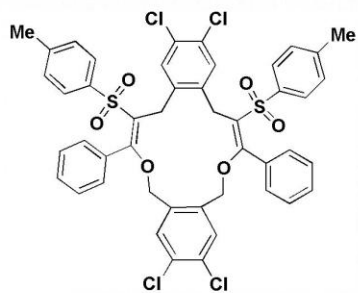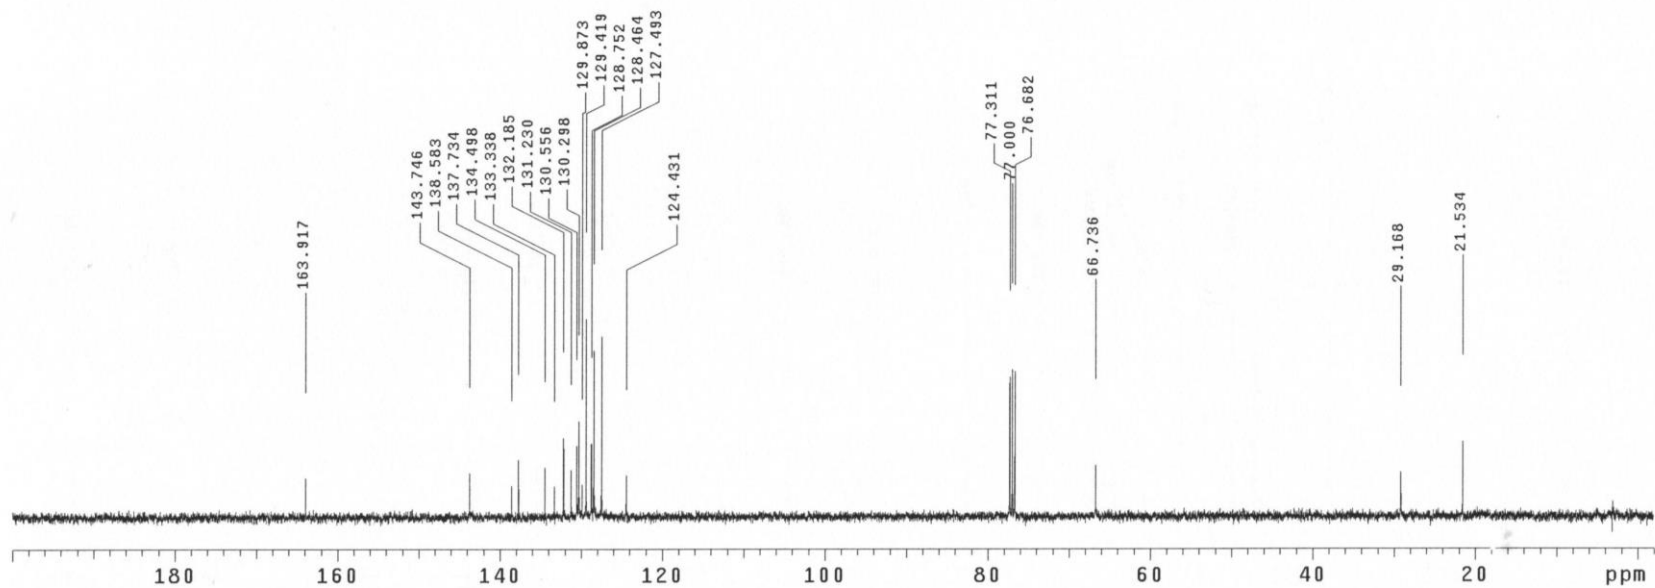

# Compound 8z (<sup>1</sup>H-NMR spectral data)

NC0810-14

Pulse Sequence: s2pu1

UNITYplus-400 "unity400"

Date: Aug 12 2020

Solvent: CDCl<sub>3</sub>

Ambient temperature

Total 32 repetitions

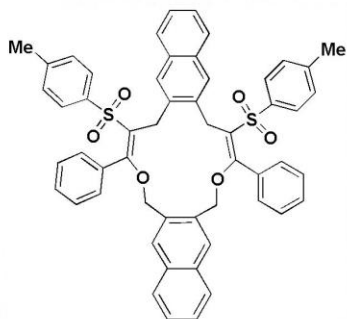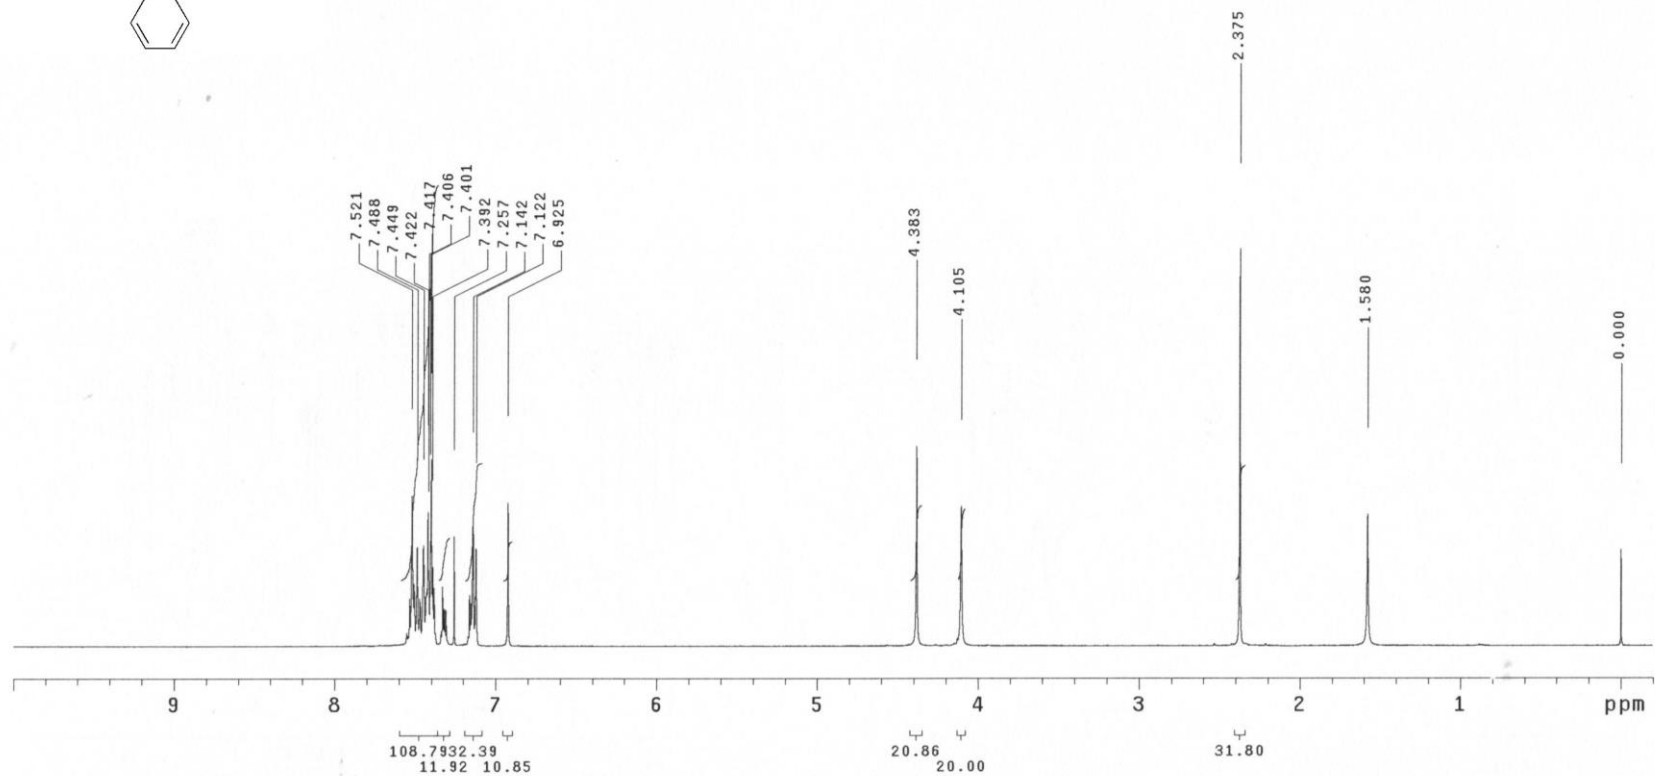



# Compound 8aa (<sup>1</sup>H-NMR spectral data)

NC0821-14

Pulse Sequence: s2pu1

UNITYplus-400 "unity400"

Date: Oct 16 2020

Solvent: CDCl<sub>3</sub>

Ambient temperature

Total 32 repetitions

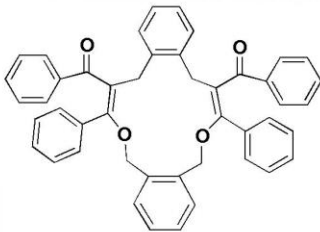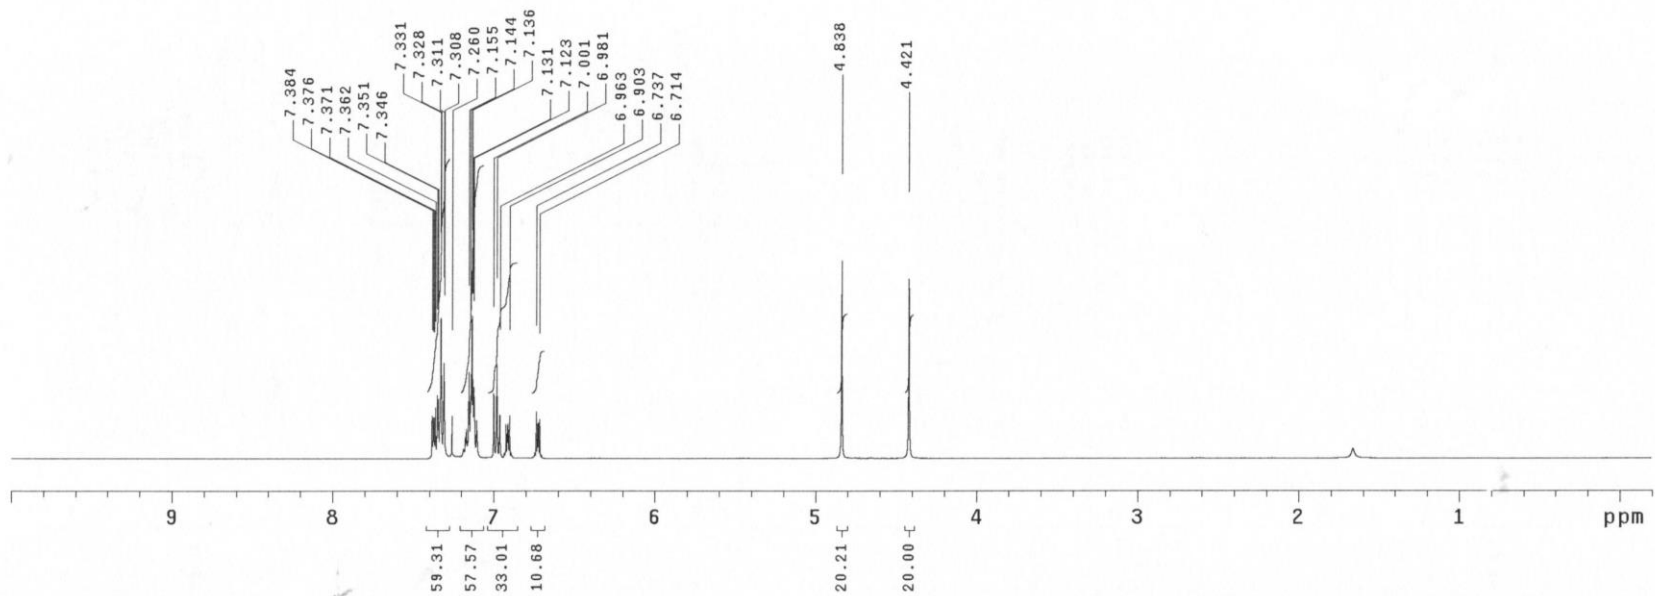

# Compound 8aa (<sup>13</sup>C-NMR spectral data)

NC0821-14

Pulse Sequence: s2pu1  
UNITYplus-400 "unity400"  
Date: Oct 16 2020  
Solvent: CDCl<sub>3</sub>  
Ambient temperature  
Total 1200 repetitions

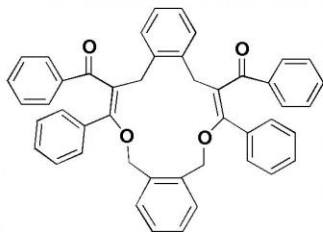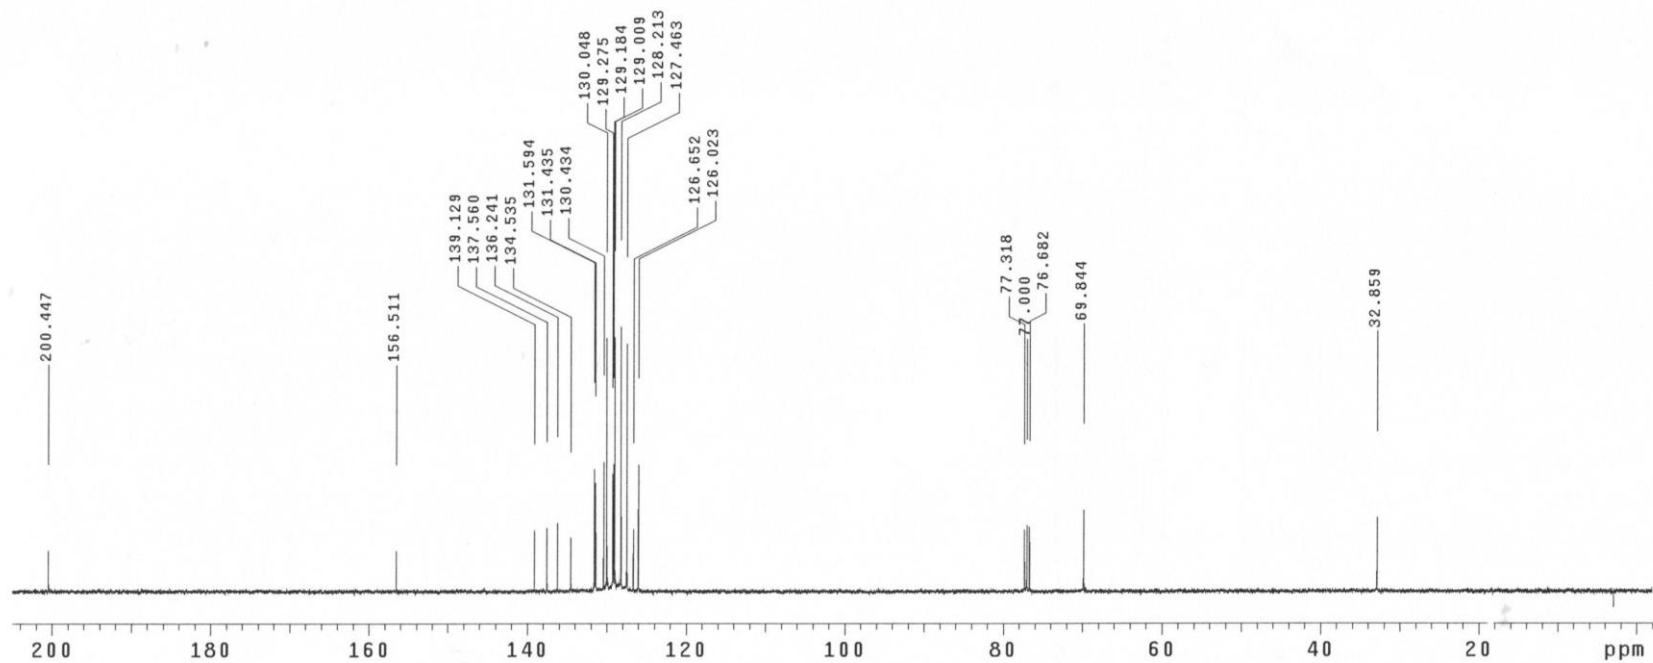

# Compound 8ab-1 (<sup>1</sup>H-NMR spectral data)

NC5072

Pulse Sequence: s2pu1

UNITYplus-400 "unity400"

Date: Sep 1 2020

Solvent: CDCl<sub>3</sub>

Ambient temperature

Total 32 repetitions

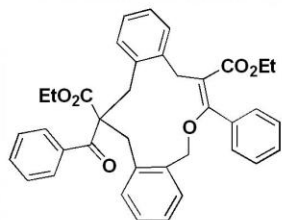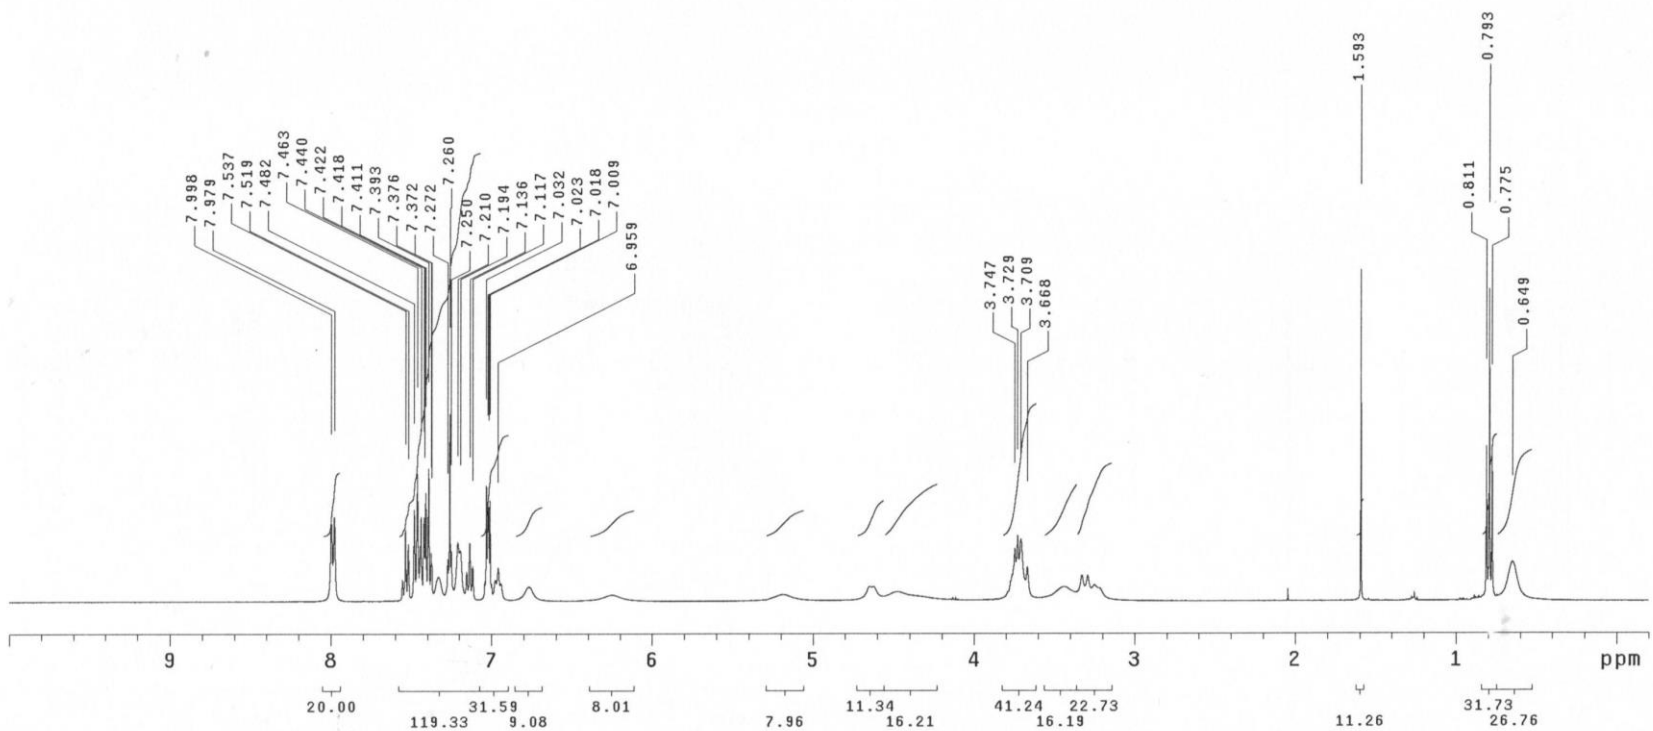



# Compound 8ad (<sup>1</sup>H-NMR spectral data)

NC0903-14

Pulse Sequence: s2pu1

UNITYplus-400 "unity400"

Date: Sep 7 2020

Solvent: CDCl<sub>3</sub>

Ambient temperature

Total 32 repetitions

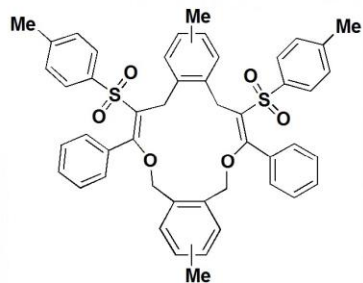

two isomers  
(ratio = 1 : 1)

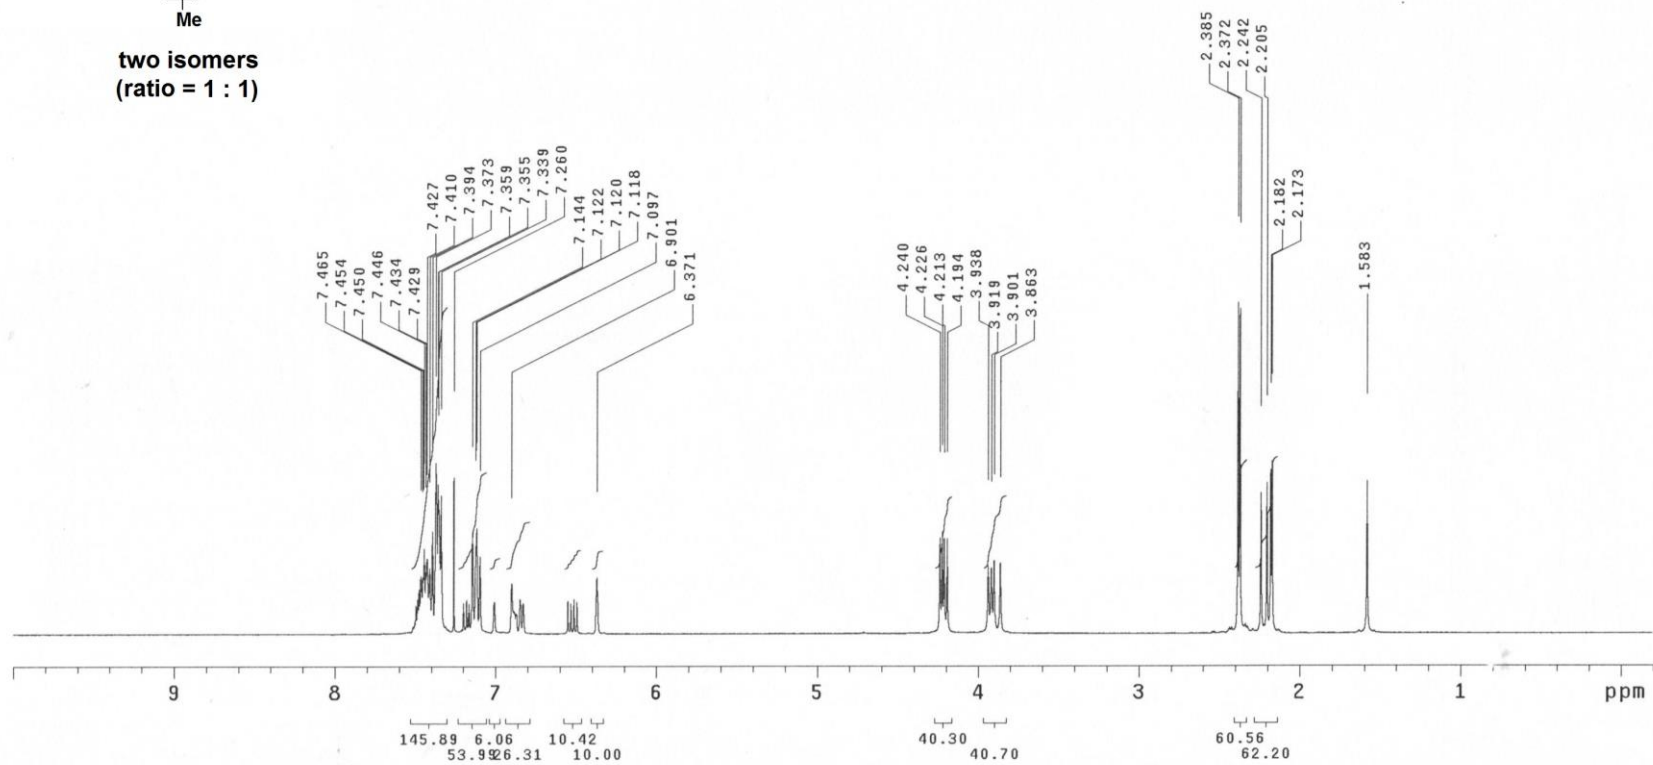



# Compound 8ad (<sup>13</sup>C-NMR spectral data)

NC0903-14

Pulse Sequence: s2pu1

UNITYplus-400 "unity400"

Date: Sep 7 2020

Solvent: CDCl<sub>3</sub>

Ambient temperature

Total 3136 repetitions

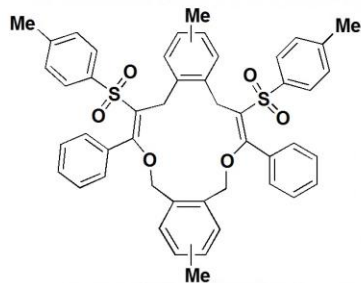

two isomers  
(ratio = 1 : 1)

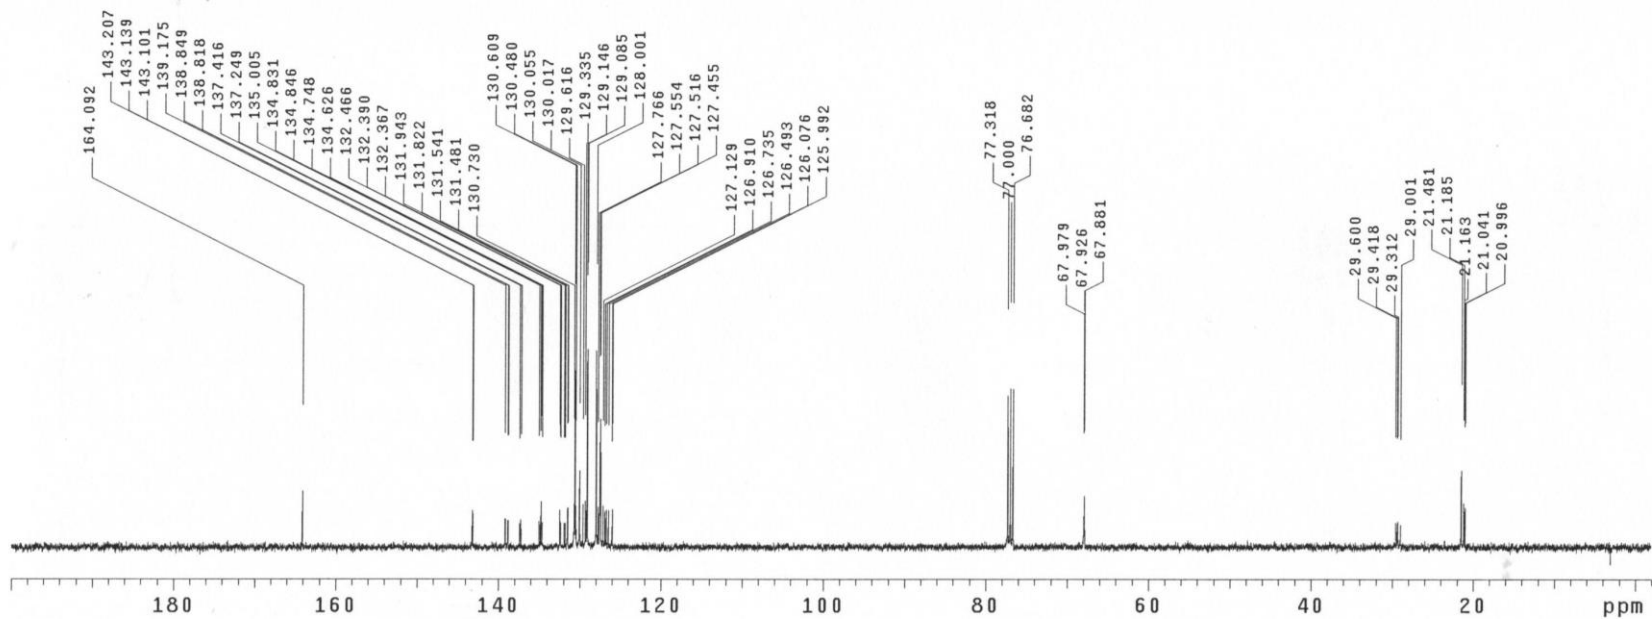

# Compound 12 (<sup>1</sup>H-NMR spectral data)

NC0909-6

Pulse Sequence: s2pu1

UNITYplus-400 "unity400"

Date: Sep 10 2020

Solvent: CDCl<sub>3</sub>

Ambient temperature

Total 32 repetitions

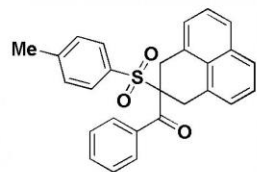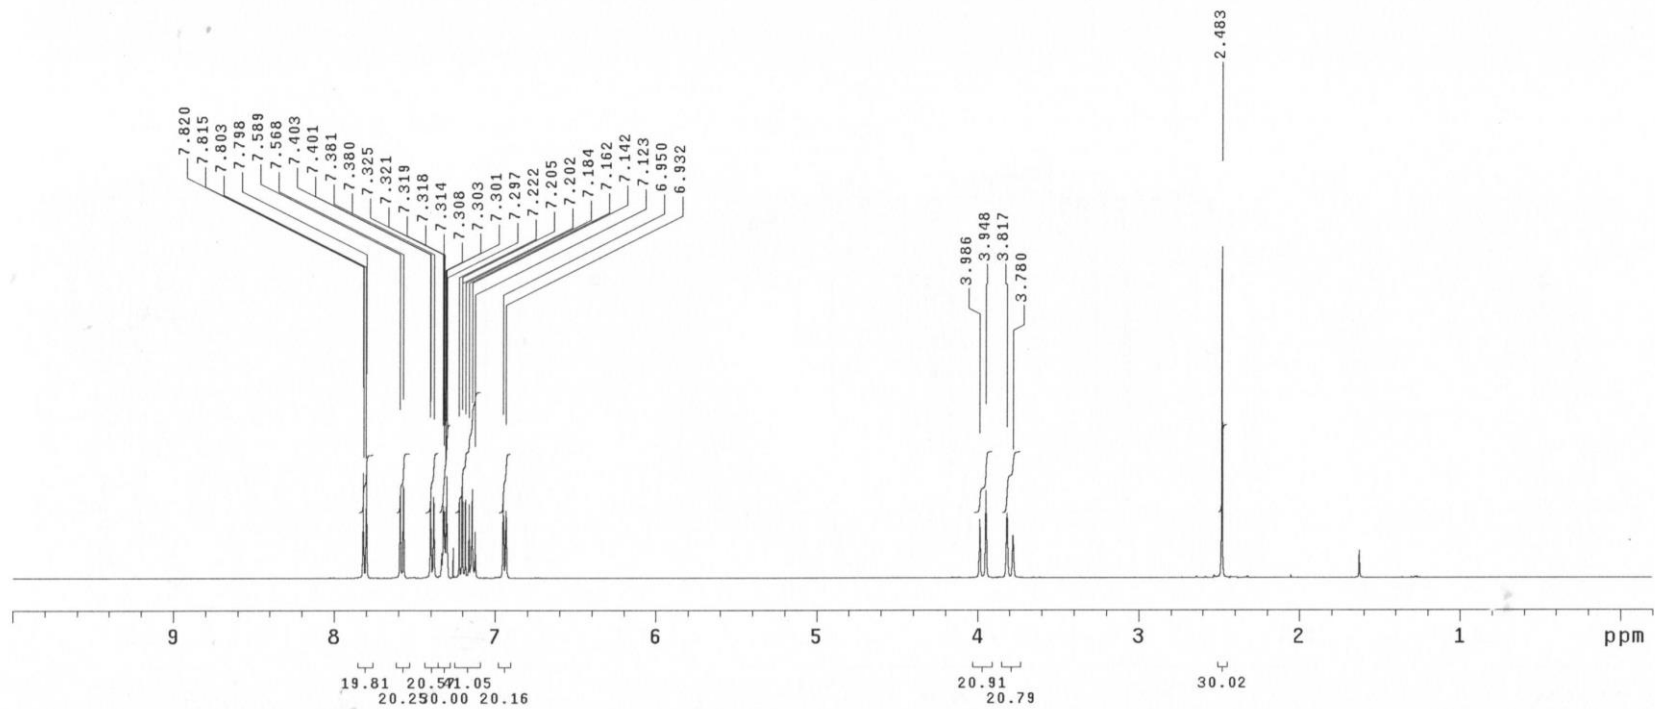

# Compound 12 (<sup>13</sup>C-NMR spectral data)

NC0909-6

Pulse Sequence: s2pu1

UNITYplus-400 "unity400"

Date: Sep 10 2020

Solvent: CDCl<sub>3</sub>

Ambient temperature

Total 400 repetitions

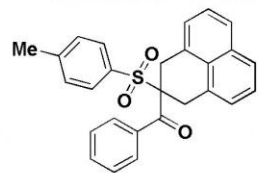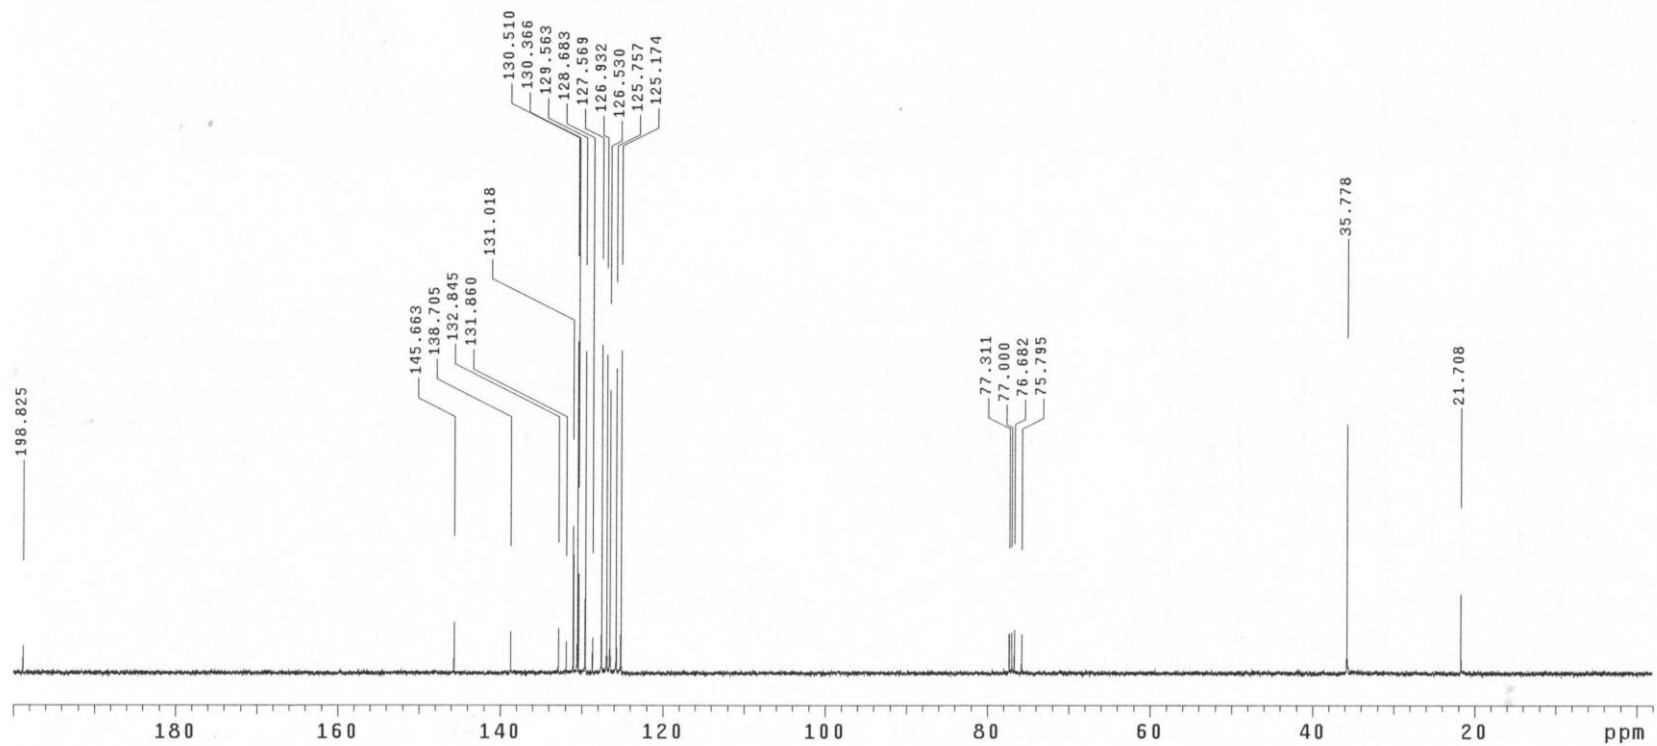

# Compound 13 (<sup>1</sup>H-NMR spectral data)

NC1015-9

Pulse Sequence: s2pu1  
UNITYplus-400 "unity400"  
Date: Oct 16 2020  
Solvent: CDCl<sub>3</sub>  
Ambient temperature  
Total 32 repetitions

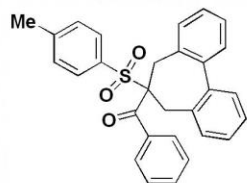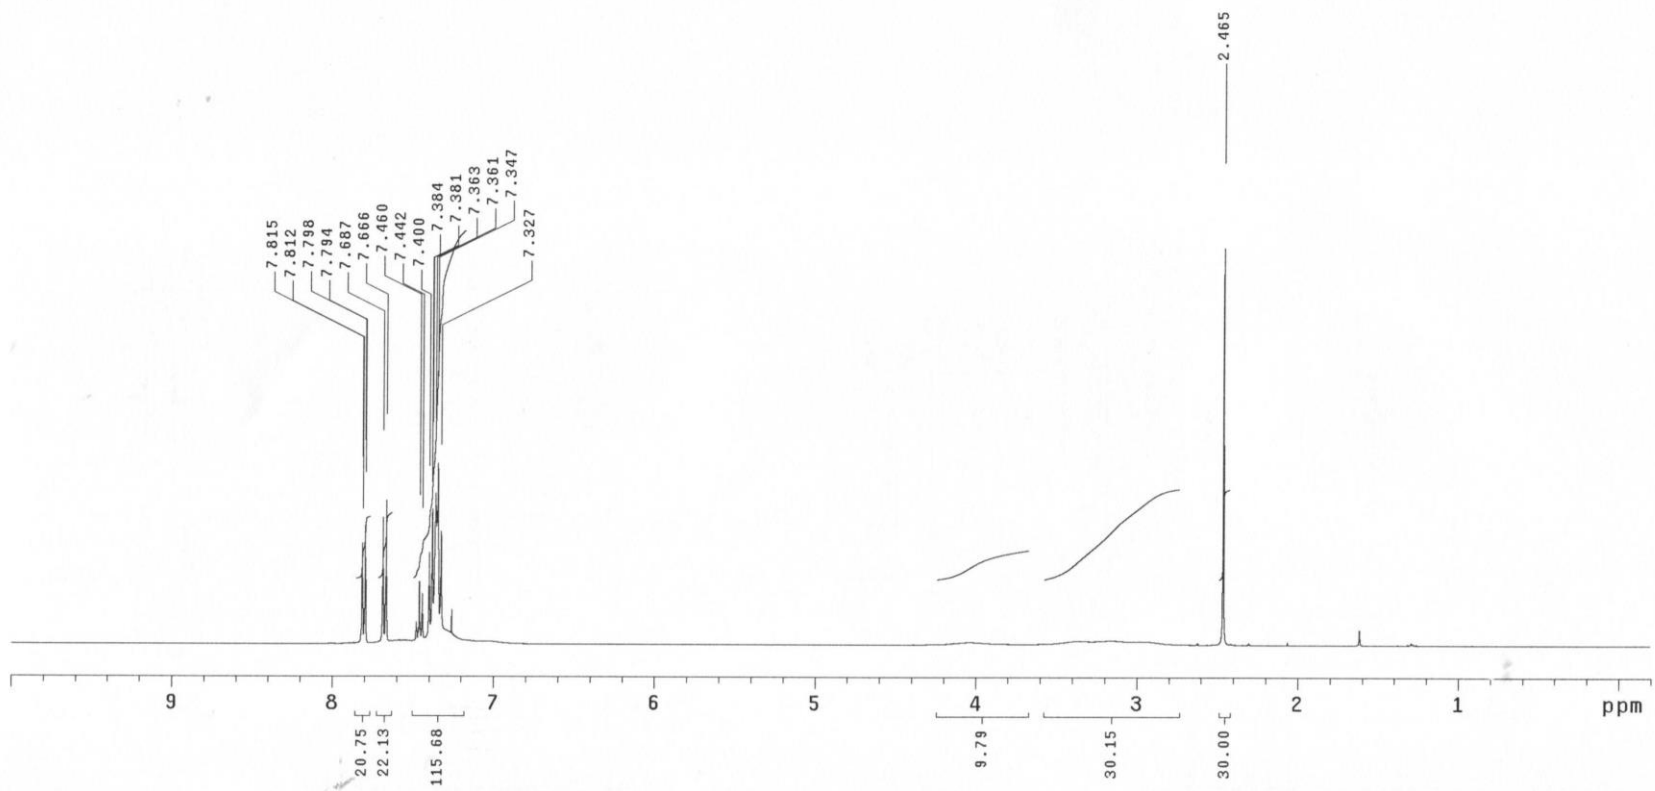

# Compound 13 (<sup>13</sup>C-NMR spectral data)

NC1015-9

Pulse Sequence: s2pu1

UNITYplus-400 "unity400"

Date: Oct 16 2020

Solvent: CDCl<sub>3</sub>

Ambient temperature

Total 2240 repetitions

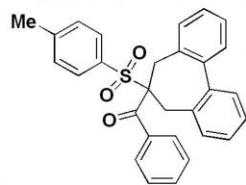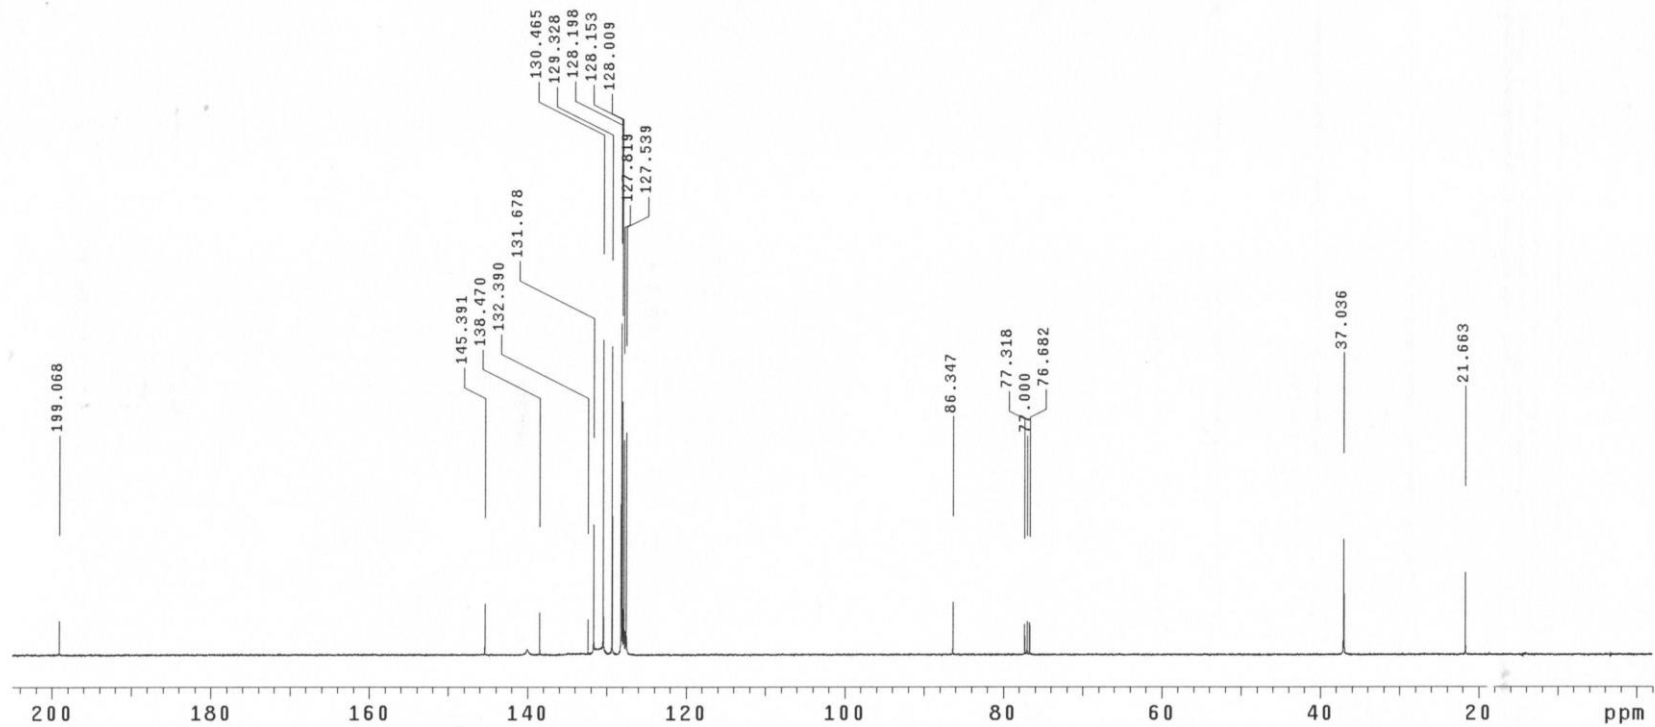

# Compound 14 (<sup>1</sup>H-NMR spectral data)

NC0907-8

Pulse Sequence: s2pu1

UNITYplus-400 "unity400"

Date: Sep 10 2020

Solvent: CDCl<sub>3</sub>

Ambient temperature

Total 32 repetitions

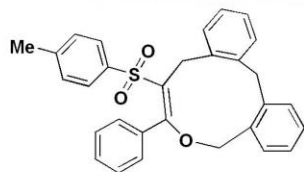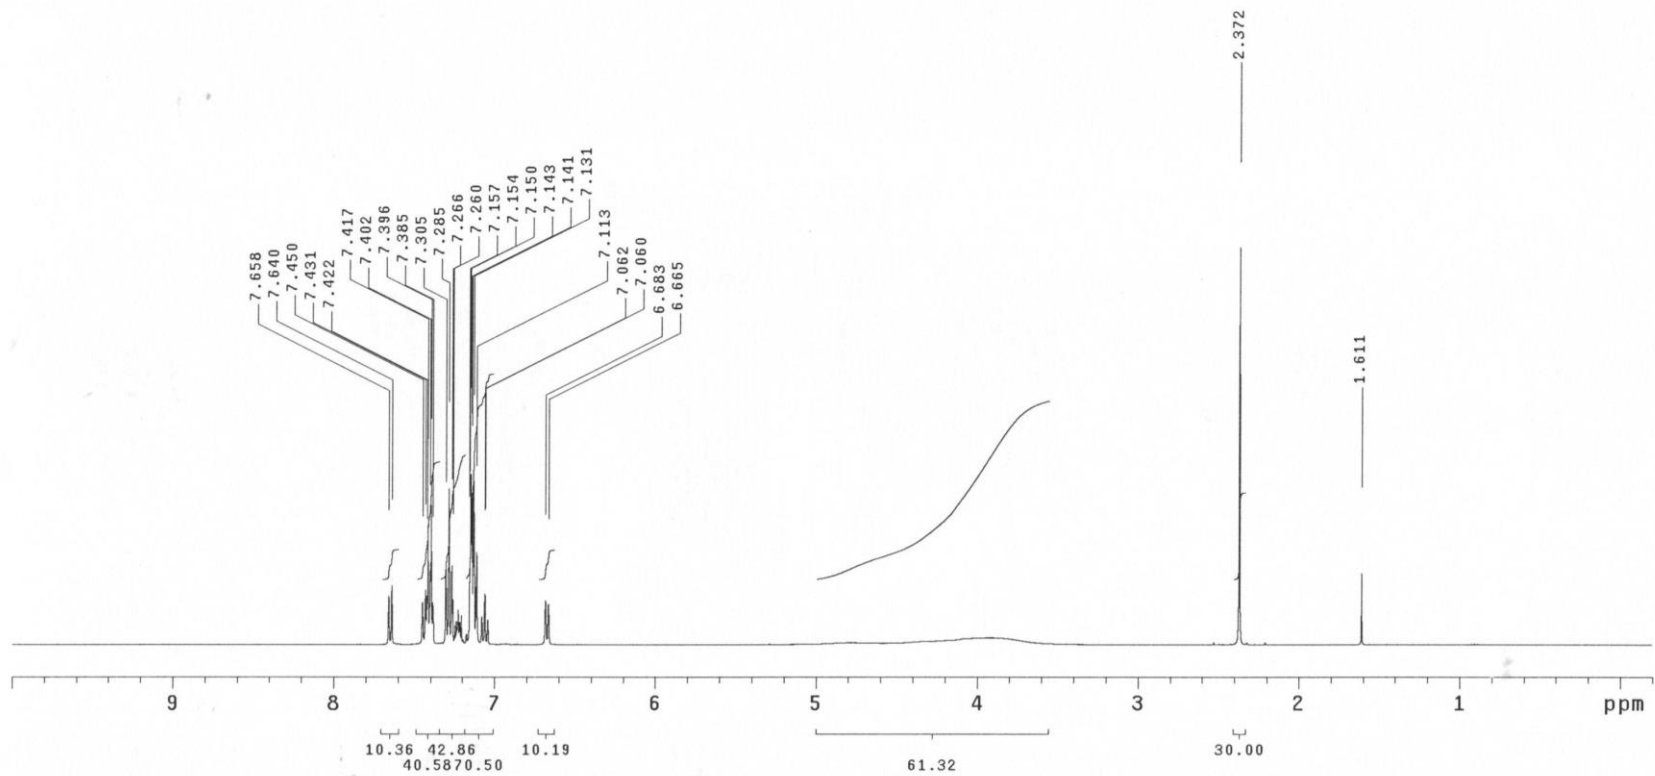

# Compound 14 (<sup>13</sup>C-NMR spectral data)

NC0907-8

Pulse Sequence: s2pu1

UNITYplus-400 "unity400"

Date: Sep 10 2020

Solvent: CDC13

Ambient temperature

Total 1024 repetitions

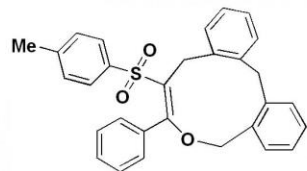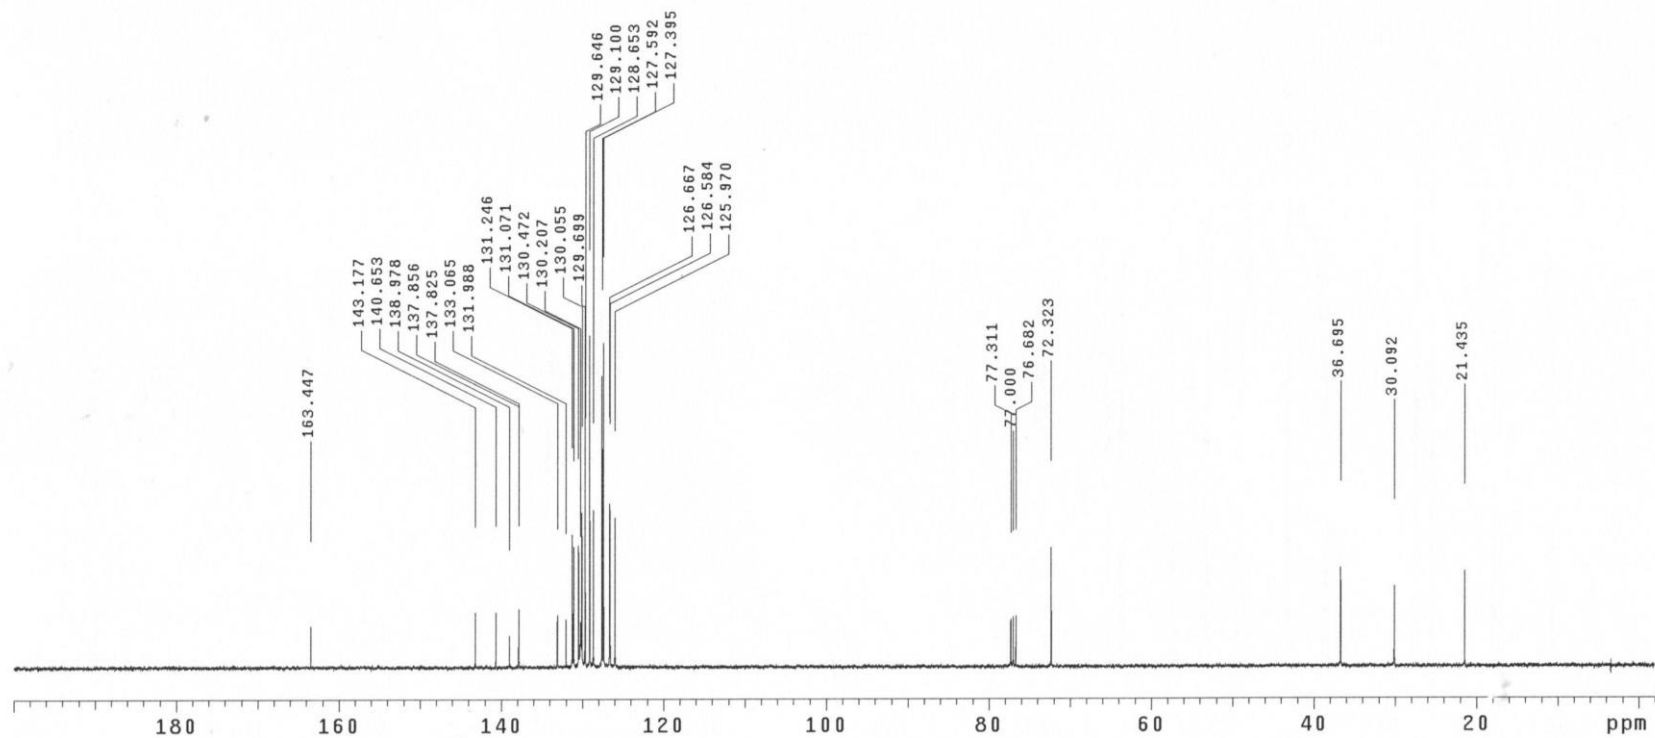

# Compound 15 (<sup>1</sup>H-NMR spectral data)

KT04217R

Pulse Sequence: s2pu1

UNITYplus-400 "unity400"

Date: Apr 27 2020

Solvent: CDCl<sub>3</sub>

Ambient temperature

Total 32 repetitions

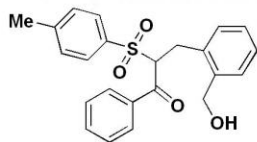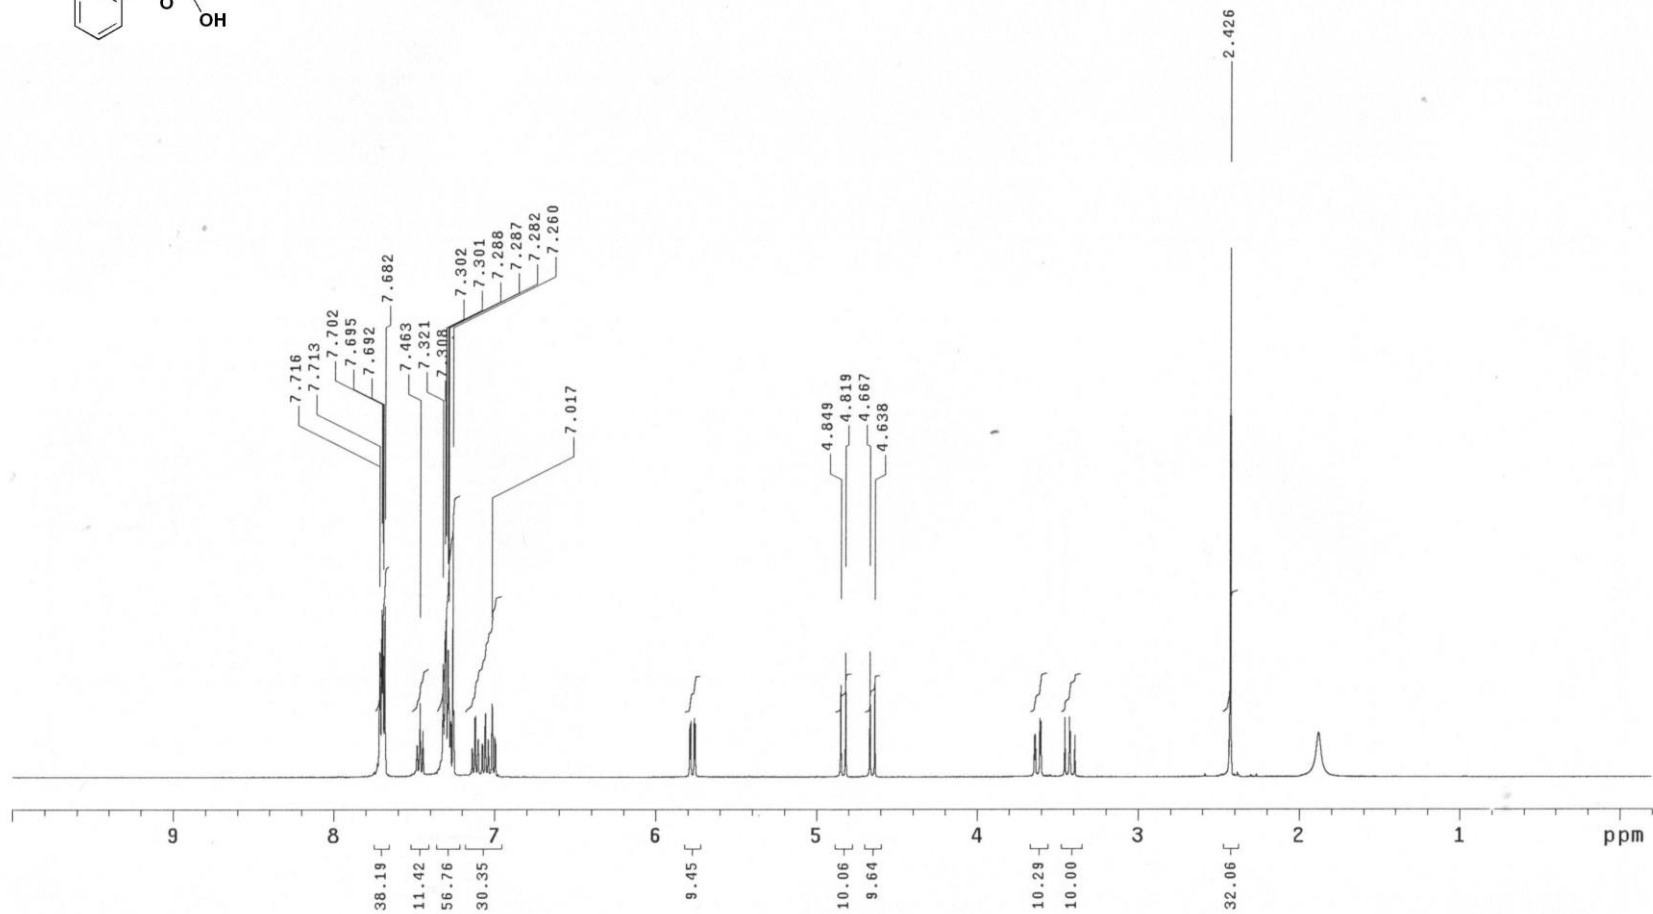



# Compound 15 (<sup>13</sup>C-NMR spectral data)

KT04217R

Pulse Sequence: s2pu1

UNITYplus-400 "unity400"

Date: Apr 27 2020

Solvent: CDC13

Ambient temperature

Total 3360 repetitions

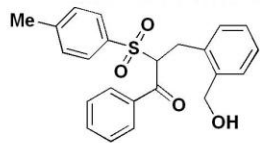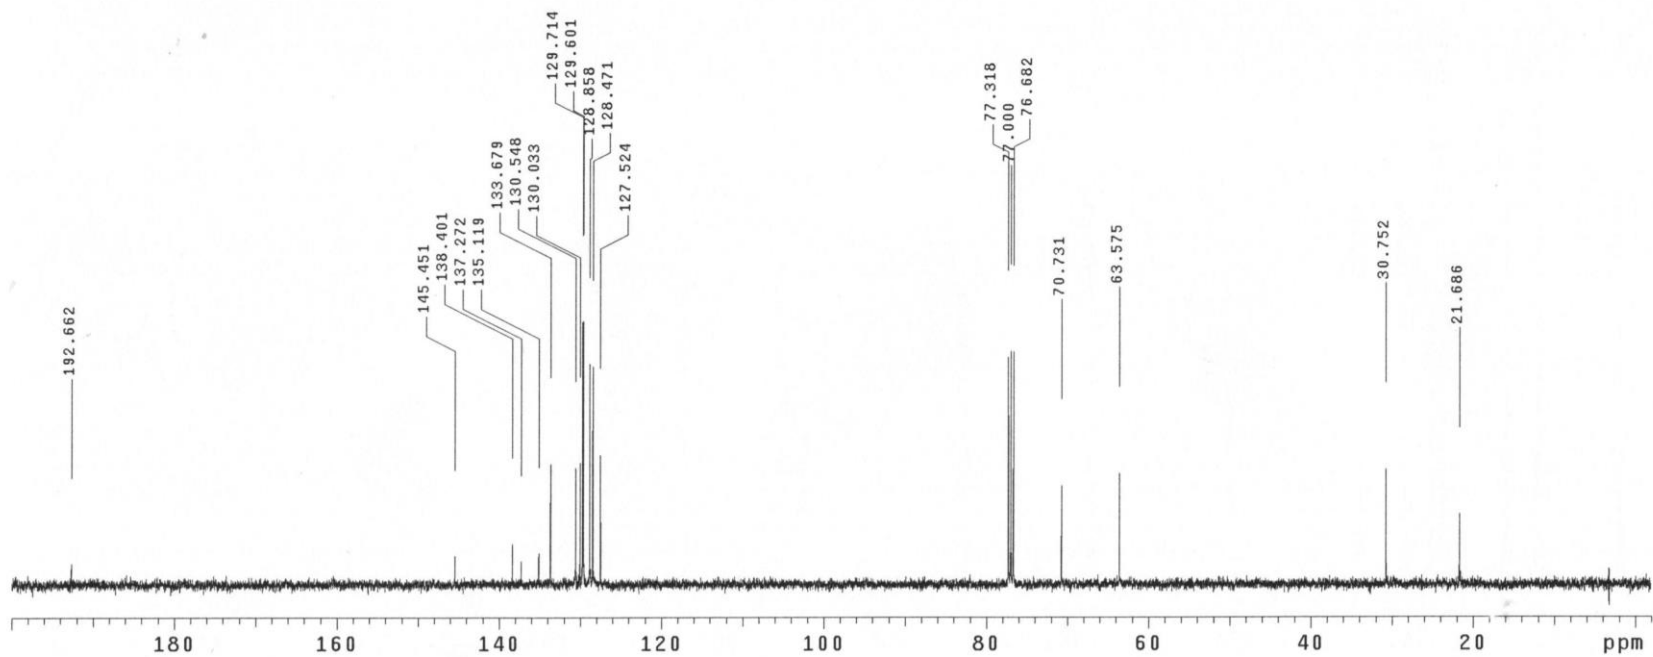

## X-ray crystal data of compound 7a (CCDC 2042099)

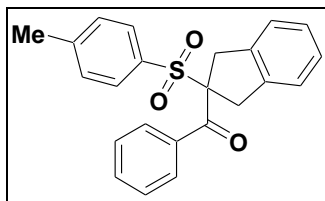

**Sample preparation** : A solution of compound **7a** (30 mg) in CH<sub>2</sub>Cl<sub>2</sub> (10 mL) was placed in a tube (10 mL). EtOAc (2 mL) was added slowly to the vial with a dropper. The vial was closed with little cotton and kept at room temperature for 2 days. Then, colorless prisms were observed.

**Crystal measurement** : X-ray crystal structures were determined with a Bruker Enraf-Nonius single-crystal diffractometer (CAD4, Kappa CCD). Thermal ellipsoids are drawn at 50% probability level.

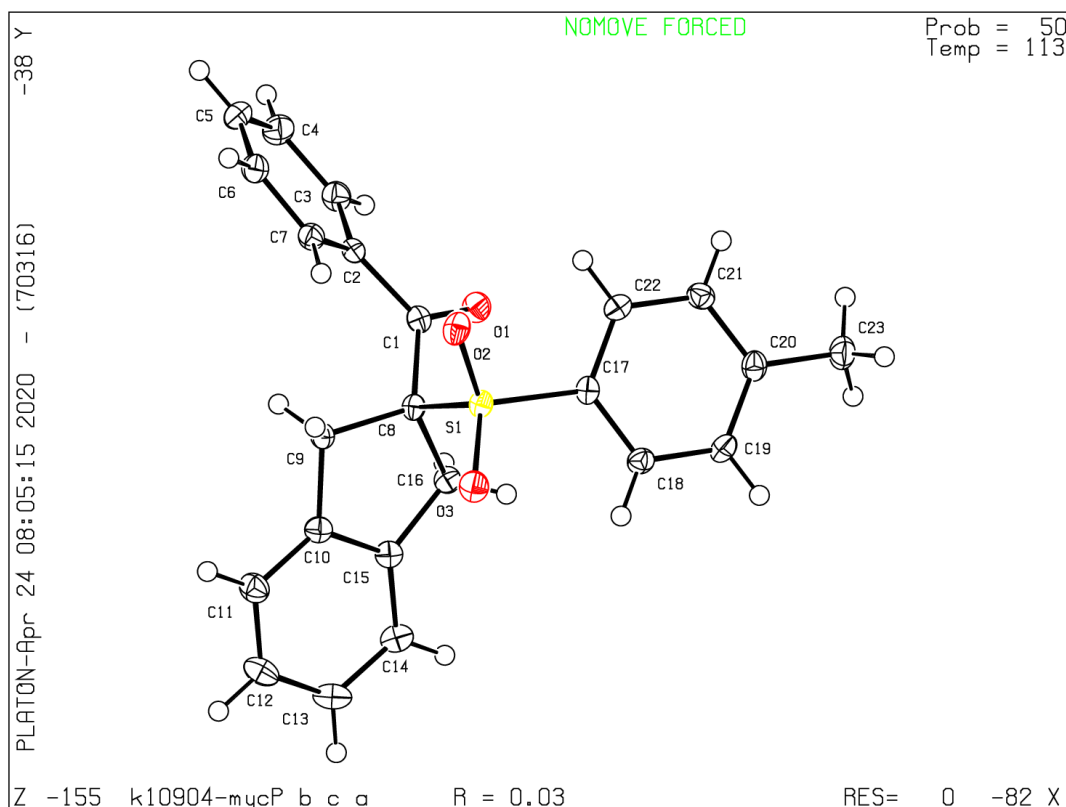

|                                             |                                                               |
|---------------------------------------------|---------------------------------------------------------------|
| Empirical formula                           | C <sub>23</sub> H <sub>20</sub> O <sub>3</sub> S              |
| Formula weight                              | 376.45                                                        |
| Temperature/K                               | 113(2)                                                        |
| Crystal system                              | orthorhombic                                                  |
| Space group                                 | Pbca                                                          |
| a/Å                                         | 15.9413(2)                                                    |
| b/Å                                         | 11.76610(10)                                                  |
| c/Å                                         | 19.6971(2)                                                    |
| α/°                                         | 90                                                            |
| β/°                                         | 90                                                            |
| γ/°                                         | 90                                                            |
| Volume/Å <sup>3</sup>                       | 3694.52(7)                                                    |
| Z                                           | 8                                                             |
| ρ <sub>calc</sub> /cm <sup>3</sup>          | 1.354                                                         |
| μ/mm <sup>-1</sup>                          | 0.196                                                         |
| F(000)                                      | 1584.0                                                        |
| Crystal size/mm <sup>3</sup>                | 0.15 × 0.15 × 0.15                                            |
| Radiation                                   | Mo Kα (λ = 0.71073)                                           |
| 2θ range for data collection/°              | 4.136 to 54.116                                               |
| Index ranges                                | -20 ≤ h ≤ 19, -14 ≤ k ≤ 13, -24 ≤ l ≤ 25                      |
| Reflections collected                       | 73544                                                         |
| Independent reflections                     | 3978 [R <sub>int</sub> = 0.0305, R <sub>sigma</sub> = 0.0132] |
| Data/restraints/parameters                  | 3978/0/246                                                    |
| Goodness-of-fit on F <sup>2</sup>           | 1.060                                                         |
| Final R indexes [I ≥ 2σ (I)]                | R <sub>1</sub> = 0.0313, wR <sub>2</sub> = 0.0806             |
| Final R indexes [all data]                  | R <sub>1</sub> = 0.0346, wR <sub>2</sub> = 0.0823             |
| Largest diff. peak/hole / e Å <sup>-3</sup> | 0.38/-0.42                                                    |

## X-ray crystal data of compound 8a (CCDC 2042100)

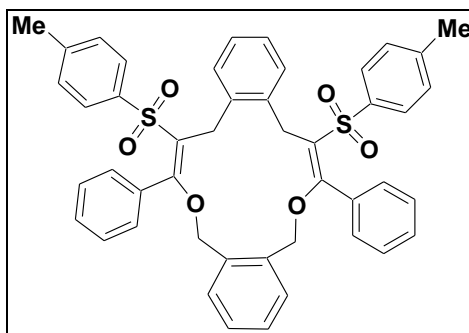

**Sample preparation** : A solution of compound **8a** (30 mg) in CH<sub>2</sub>Cl<sub>2</sub> (10 mL) was placed in a tube (10 mL). EtOAc (2 mL) was added slowly to the vial with a dropper. The vial was closed with little cotton and kept at room temperature for 2 days. Then, colorless prisms were observed.

**Crystal measurement** : X-ray crystal structures were determined with a Bruker Enraf-Nonius single-crystal diffractometer (CAD4, Kappa CCD). Thermal ellipsoids are drawn at 50% probability level.

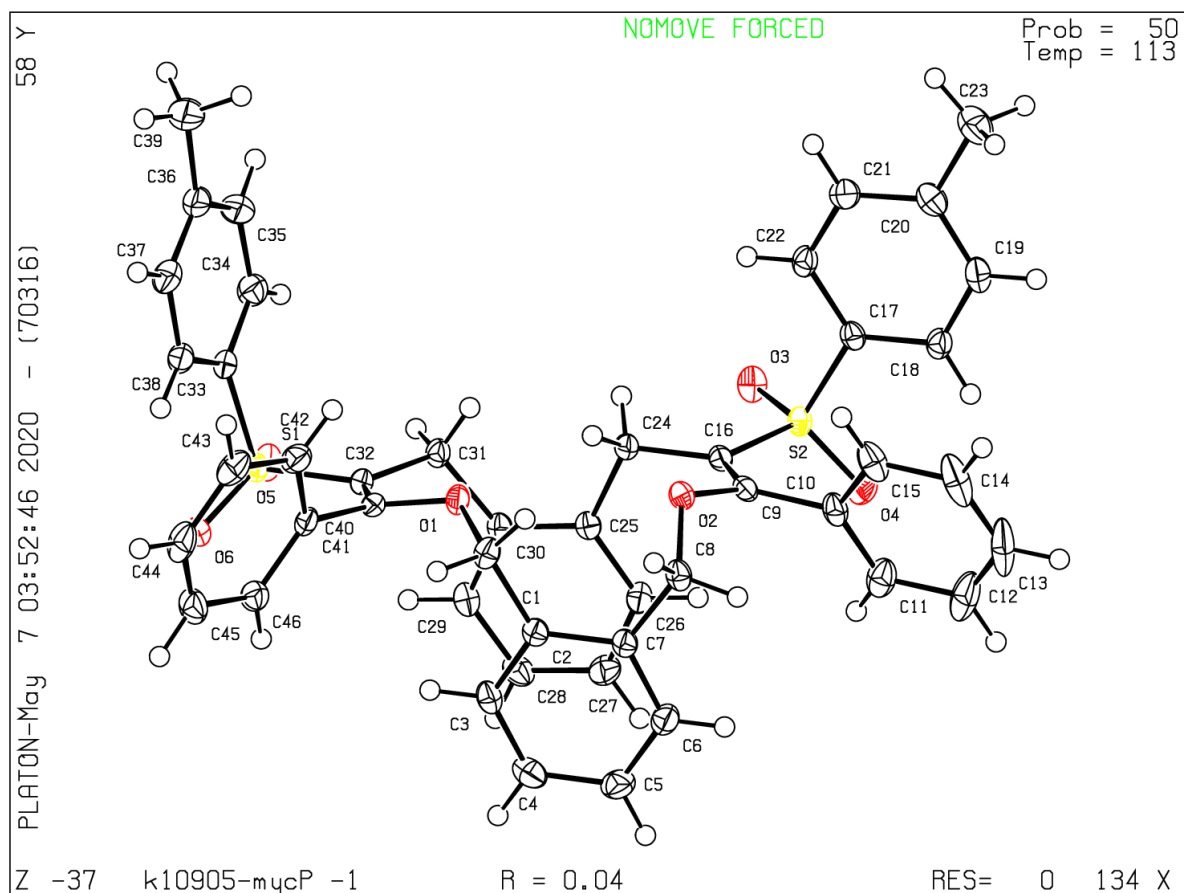

|                                             |                                                               |
|---------------------------------------------|---------------------------------------------------------------|
| Empirical formula                           | C <sub>46</sub> H <sub>40</sub> O <sub>6</sub> S <sub>2</sub> |
| Formula weight                              | 752.90                                                        |
| Temperature/K                               | 113(2)                                                        |
| Crystal system                              | triclinic                                                     |
| Space group                                 | P-1                                                           |
| a/Å                                         | 9.7982(3)                                                     |
| b/Å                                         | 13.2829(4)                                                    |
| c/Å                                         | 16.3495(4)                                                    |
| α/°                                         | 113.228(2)                                                    |
| β/°                                         | 99.000(2)                                                     |
| γ/°                                         | 97.420(2)                                                     |
| Volume/Å <sup>3</sup>                       | 1888.14(10)                                                   |
| Z                                           | 2                                                             |
| ρ <sub>calc</sub> /cm <sup>3</sup>          | 1.324                                                         |
| μ/mm <sup>-1</sup>                          | 0.192                                                         |
| F(000)                                      | 792.0                                                         |
| Crystal size/mm <sup>3</sup>                | 0.2 × 0.2 × 0.2                                               |
| Radiation                                   | Mo Kα (λ = 0.71073)                                           |
| 2θ range for data collection/°              | 4.306 to 54.158                                               |
| Index ranges                                | -12 ≤ h ≤ 12, -16 ≤ k ≤ 16, -20 ≤ l ≤ 20                      |
| Reflections collected                       | 59934                                                         |
| Independent reflections                     | 7935 [R <sub>int</sub> = 0.0414, R <sub>sigma</sub> = 0.0272] |
| Data/restraints/parameters                  | 7935/0/490                                                    |
| Goodness-of-fit on F <sup>2</sup>           | 1.051                                                         |
| Final R indexes [I ≥ 2σ (I)]                | R <sub>1</sub> = 0.0367, wR <sub>2</sub> = 0.0968             |
| Final R indexes [all data]                  | R <sub>1</sub> = 0.0429, wR <sub>2</sub> = 0.1005             |
| Largest diff. peak/hole / e Å <sup>-3</sup> | 0.78/-0.41                                                    |

## X-ray crystal data of compound 8c (CCDC 2042101)

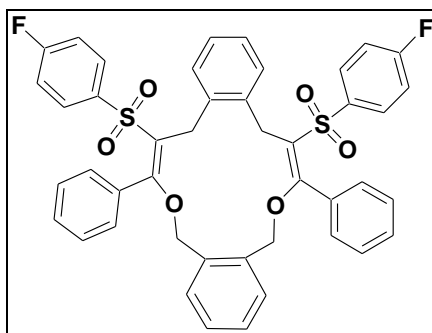

**Sample preparation** : A solution of compound **8c** (30 mg) in CHCl<sub>3</sub> (10 mL) was placed in a tube (10 mL). EtOAc (2 mL) was added slowly to the vial with a dropper. The vial was closed with little cotton and kept at room temperature for 2 days. Then, colorless prisms were observed.

**Crystal measurement** : X-ray crystal structures were determined with a Bruker Enraf-Nonius single-crystal diffractometer (CAD4, Kappa CCD). Thermal ellipsoids are drawn at 50% probability level.

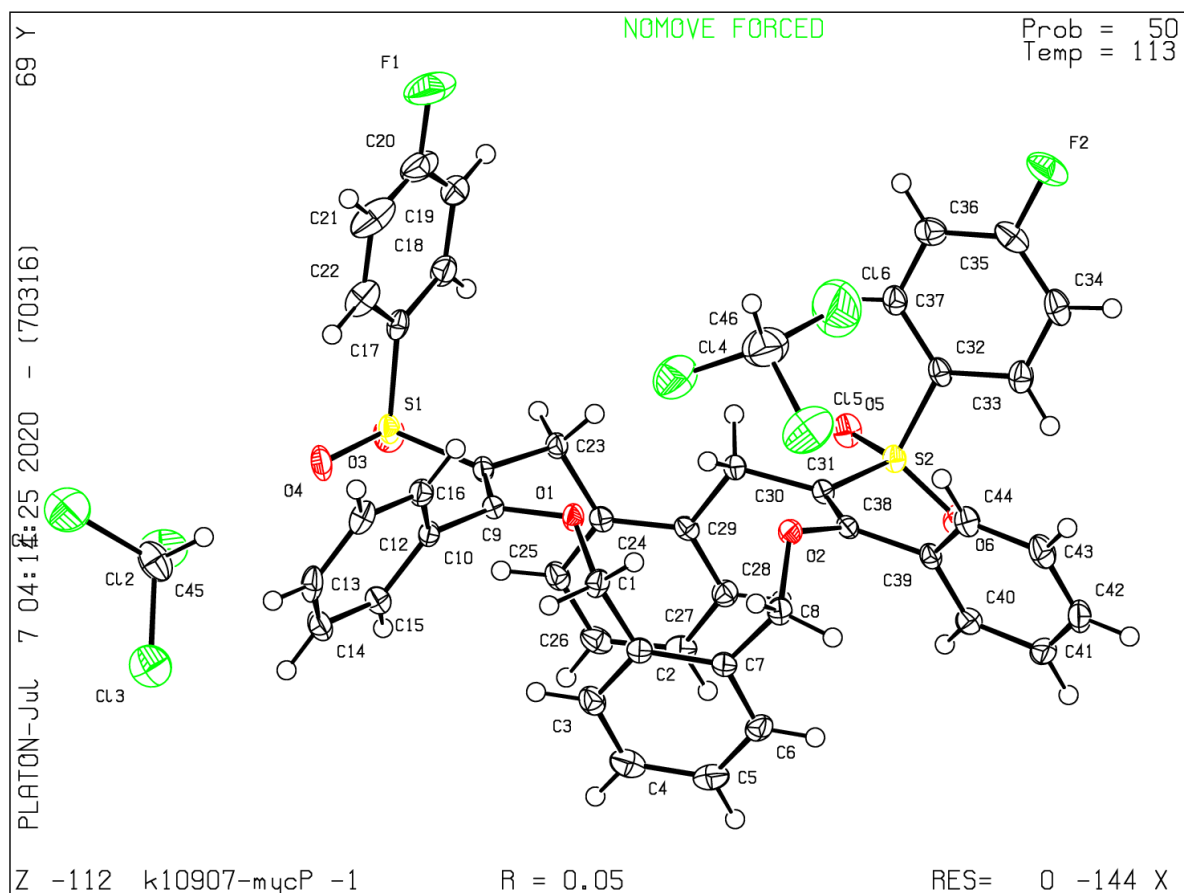

|                                             |                                                                                              |
|---------------------------------------------|----------------------------------------------------------------------------------------------|
| Empirical formula                           | C <sub>46</sub> H <sub>36</sub> Cl <sub>6</sub> F <sub>2</sub> O <sub>6</sub> S <sub>2</sub> |
| Formula weight                              | 999.57                                                                                       |
| Temperature/K                               | 113(2)                                                                                       |
| Crystal system                              | triclinic                                                                                    |
| Space group                                 | P-1                                                                                          |
| a/Å                                         | 10.35170(10)                                                                                 |
| b/Å                                         | 14.6496(2)                                                                                   |
| c/Å                                         | 16.2001(3)                                                                                   |
| α/°                                         | 85.3580(10)                                                                                  |
| β/°                                         | 75.2910(10)                                                                                  |
| γ/°                                         | 69.7540(10)                                                                                  |
| Volume/Å <sup>3</sup>                       | 2229.33(6)                                                                                   |
| Z                                           | 2                                                                                            |
| ρ <sub>calc</sub> /cm <sup>3</sup>          | 1.489                                                                                        |
| μ/mm <sup>-1</sup>                          | 0.537                                                                                        |
| F(000)                                      | 1024.0                                                                                       |
| Crystal size/mm <sup>3</sup>                | 0.25 × 0.2 × 0.2                                                                             |
| Radiation                                   | Mo Kα (λ = 0.71073)                                                                          |
| 2θ range for data collection/°              | 3.926 to 54.106                                                                              |
| Index ranges                                | -13 ≤ h ≤ 13, -18 ≤ k ≤ 17, -20 ≤ l ≤ 20                                                     |
| Reflections collected                       | 55235                                                                                        |
| Independent reflections                     | 9369 [R <sub>int</sub> = 0.0284, R <sub>sigma</sub> = 0.0244]                                |
| Data/restraints/parameters                  | 9369/0/559                                                                                   |
| Goodness-of-fit on F <sup>2</sup>           | 1.053                                                                                        |
| Final R indexes [I ≥ 2σ (I)]                | R <sub>1</sub> = 0.0484, wR <sub>2</sub> = 0.1337                                            |
| Final R indexes [all data]                  | R <sub>1</sub> = 0.0525, wR <sub>2</sub> = 0.1374                                            |
| Largest diff. peak/hole / e Å <sup>-3</sup> | 0.83/-1.29                                                                                   |

## X-ray crystal data of compound 8m (CCDC 2042102)

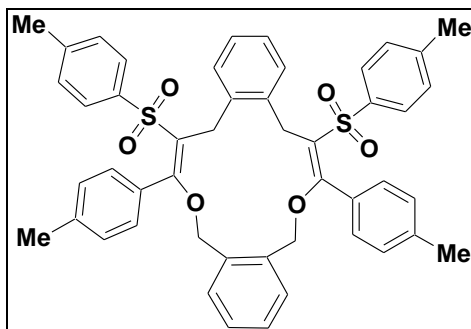

**Sample preparation** : A solution of compound **8m** (30 mg) in CH<sub>2</sub>Cl<sub>2</sub> (10 mL) was placed in a tube (10 mL). EtOAc (2 mL) was added slowly to the vial with a dropper. The vial was closed with little cotton and kept at room temperature for 2 days. Then, colorless prisms were observed.

**Crystal measurement** : X-ray crystal structures were determined with a Bruker Enraf-Nonius single-crystal diffractometer (CAD4, Kappa CCD). Thermal ellipsoids are drawn at 50% probability level.

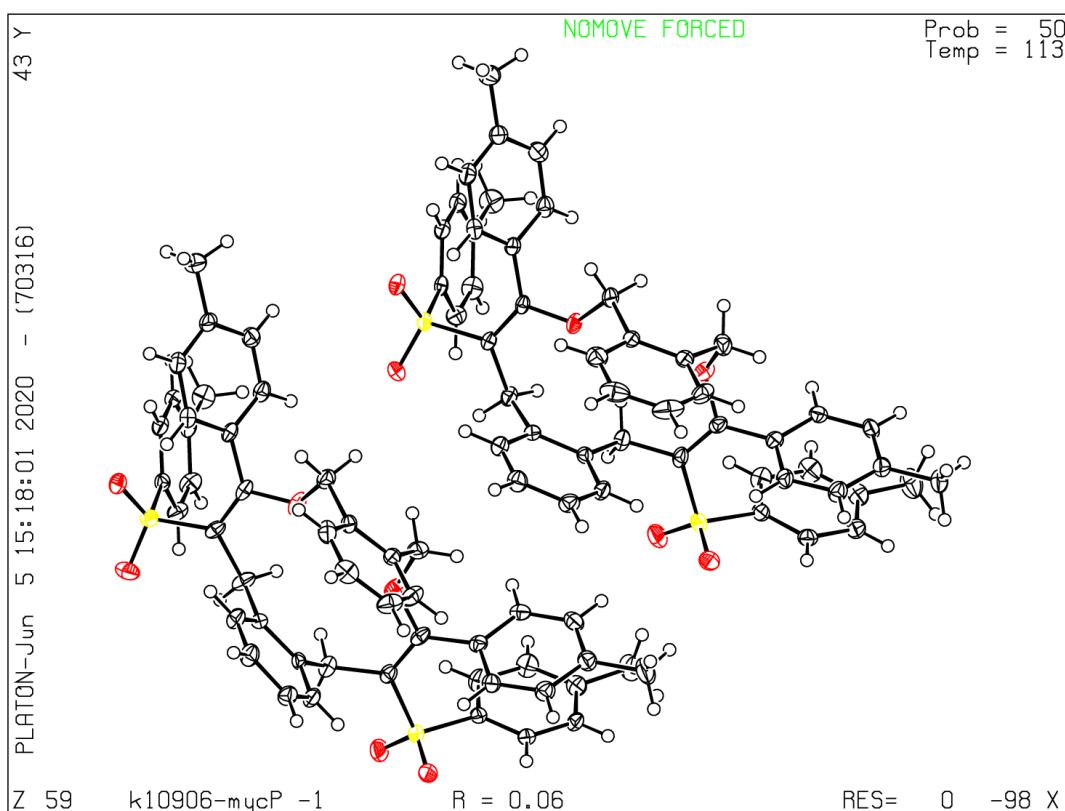



|                                             |                                                                           |
|---------------------------------------------|---------------------------------------------------------------------------|
| Empirical formula                           | C <sub>11.29</sub> H <sub>10.35</sub> O <sub>1.41</sub> S <sub>0.47</sub> |
| Formula weight                              | 183.75                                                                    |
| Temperature/K                               | 113(2)                                                                    |
| Crystal system                              | triclinic                                                                 |
| Space group                                 | P-1                                                                       |
| a/Å                                         | 14.1278(3)                                                                |
| b/Å                                         | 16.6555(3)                                                                |
| c/Å                                         | 17.1139(3)                                                                |
| α/°                                         | 85.246(2)                                                                 |
| β/°                                         | 87.858(2)                                                                 |
| γ/°                                         | 74.443(2)                                                                 |
| Volume/Å <sup>3</sup>                       | 3865.64(13)                                                               |
| Z                                           | 17                                                                        |
| ρ <sub>calc</sub> /g/cm <sup>3</sup>        | 1.342                                                                     |
| μ/mm <sup>-1</sup>                          | 0.190                                                                     |
| F(000)                                      | 1648.0                                                                    |
| Crystal size/mm <sup>3</sup>                | 0.3 × 0.3 × 0.3                                                           |
| Radiation                                   | Mo Kα (λ = 0.71073)                                                       |
| 2θ range for data collection/°              | 3.992 to 54.144                                                           |
| Index ranges                                | -17 ≤ h ≤ 17, -21 ≤ k ≤ 21, -21 ≤ l ≤ 20                                  |
| Reflections collected                       | 84580                                                                     |
| Independent reflections                     | 16148 [R <sub>int</sub> = 0.0484, R <sub>sigma</sub> = 0.0513]            |
| Data/restraints/parameters                  | 16148/0/1017                                                              |
| Goodness-of-fit on F <sup>2</sup>           | 1.060                                                                     |
| Final R indexes [I ≥ 2σ (I)]                | R <sub>1</sub> = 0.0579, wR <sub>2</sub> = 0.1527                         |
| Final R indexes [all data]                  | R <sub>1</sub> = 0.0779, wR <sub>2</sub> = 0.1630                         |
| Largest diff. peak/hole / e Å <sup>-3</sup> | 1.17/-0.62                                                                |



|                                             |                                                               |
|---------------------------------------------|---------------------------------------------------------------|
| Identification code                         | K10906-MYC-A                                                  |
| Empirical formula                           | C <sub>40</sub> H <sub>38</sub> O <sub>6</sub> S <sub>2</sub> |
| Formula weight                              | 678.82                                                        |
| Temperature/K                               | 113(2)                                                        |
| Crystal system                              | triclinic                                                     |
| Space group                                 | P-1                                                           |
| a/Å                                         | 10.30720(10)                                                  |
| b/Å                                         | 14.2750(3)                                                    |
| c/Å                                         | 15.3721(4)                                                    |
| α/°                                         | 62.701(2)                                                     |
| β/°                                         | 86.646(2)                                                     |
| γ/°                                         | 73.3530(10)                                                   |
| Volume/Å <sup>3</sup>                       | 1918.57(7)                                                    |
| Z                                           | 2                                                             |
| ρ <sub>calc</sub> /cm <sup>3</sup>          | 1.175                                                         |
| μ/mm <sup>-1</sup>                          | 0.182                                                         |
| F(000)                                      | 716.0                                                         |
| Crystal size/mm <sup>3</sup>                | 0.2 × 0.2 × 0.15                                              |
| Radiation                                   | Mo Kα (λ = 0.71073)                                           |
| 2θ range for data collection/°              | 3.308 to 54.01                                                |
| Index ranges                                | -12 ≤ h ≤ 13, -18 ≤ k ≤ 17, -19 ≤ l ≤ 19                      |
| Reflections collected                       | 43823                                                         |
| Independent reflections                     | 7990 [R <sub>int</sub> = 0.0359, R <sub>sigma</sub> = 0.0327] |
| Data/restraints/parameters                  | 7990/0/437                                                    |
| Goodness-of-fit on F <sup>2</sup>           | 1.066                                                         |
| Final R indexes [I ≥ 2σ (I)]                | R <sub>1</sub> = 0.0566, wR <sub>2</sub> = 0.1609             |
| Final R indexes [all data]                  | R <sub>1</sub> = 0.0699, wR <sub>2</sub> = 0.1681             |
| Largest diff. peak/hole / e Å <sup>-3</sup> | 0.51/-0.39                                                    |

## X-ray crystal data of compound 8x-1 (CCDC 2042104)

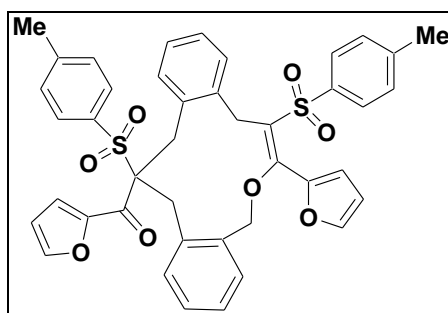

**Sample preparation** : A solution of compound **8x-1** (30 mg) in CH<sub>2</sub>Cl<sub>2</sub> (10 mL) was placed in a tube (10 mL). EtOAc (2 mL) was added slowly to the vial with a dropper. The vial was closed with little cotton and kept at room temperature for 2 days. Then, colorless prisms were observed.

**Crystal measurement** : X-ray crystal structures were determined with a Bruker Enraf-Nonius single-crystal diffractometer (CAD4, Kappa CCD). Thermal ellipsoids are drawn at 50% probability level.

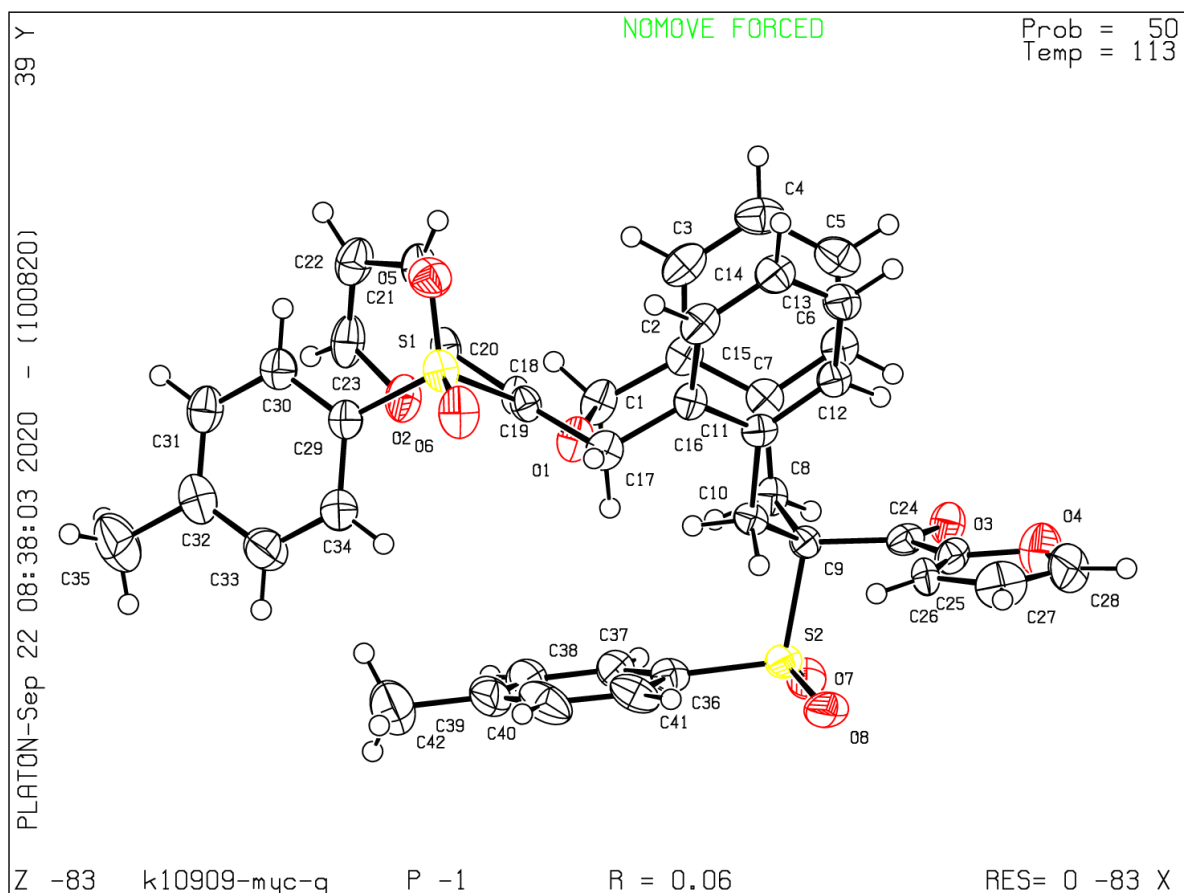

|                                   |                                             |                               |
|-----------------------------------|---------------------------------------------|-------------------------------|
| Empirical formula                 | C42 H36 O8 S2                               |                               |
| Formula weight                    | 732.83                                      |                               |
| Temperature                       | 113(2) K                                    |                               |
| Wavelength                        | 0.71073 Å                                   |                               |
| Crystal system                    | Triclinic                                   |                               |
| Space group                       | P-1                                         |                               |
| Unit cell dimensions              | a = 11.1955(4) Å                            | $\alpha = 91.424(3)^\circ$ .  |
|                                   | b = 13.5009(6) Å                            | $\beta = 109.342(4)^\circ$ .  |
|                                   | c = 14.0064(6) Å                            | $\gamma = 107.452(4)^\circ$ . |
| Volume                            | 1887.39(15) Å <sup>3</sup>                  |                               |
| Z                                 | 2                                           |                               |
| Density (calculated)              | 1.289 Mg/m <sup>3</sup>                     |                               |
| Absorption coefficient            | 0.194 mm <sup>-1</sup>                      |                               |
| F(000)                            | 768                                         |                               |
| Crystal size                      | 0.5 x 0.3 x 0.3 mm <sup>3</sup>             |                               |
| Theta range for data collection   | 1.596 to 24.999°.                           |                               |
| Index ranges                      | -13<=h<=13, -16<=k<=16, -16<=l<=16          |                               |
| Reflections collected             | 38013                                       |                               |
| Independent reflections           | 6626 [R(int) = 0.0753]                      |                               |
| Completeness to theta = 24.999°   | 99.6 %                                      |                               |
| Absorption correction             | Semi-empirical from equivalents             |                               |
| Max. and min. transmission        | 1.00000 and 0.75448                         |                               |
| Refinement method                 | Full-matrix least-squares on F <sup>2</sup> |                               |
| Data / restraints / parameters    | 6626 / 303 / 482                            |                               |
| Goodness-of-fit on F <sup>2</sup> | 1.059                                       |                               |
| Final R indices [I>2sigma(I)]     | R1 = 0.0623, wR2 = 0.1425                   |                               |
| R indices (all data)              | R1 = 0.0897, wR2 = 0.1520                   |                               |
| Extinction coefficient            | n/a                                         |                               |
| Largest diff. peak and hole       | 0.290 and -0.375 e.Å <sup>-3</sup>          |                               |

## X-ray crystal data of compound 8ab-1 (CCDC 2042105)

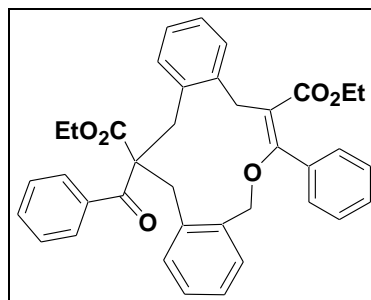

**Sample preparation** : A solution of compound **8ab-1** (30 mg) in CH<sub>2</sub>Cl<sub>2</sub> (10 mL) was placed in a tube (10 mL). EtOAc (2 mL) was added slowly to the vial with a dropper. The vial was closed with little cotton and kept at room temperature for 2 days. Then, colorless prisms were observed.

**Crystal measurement** : X-ray crystal structures were determined with a Bruker Enraf-Nonius single-crystal diffractometer (CAD4, Kappa CCD). Thermal ellipsoids are drawn at 50% probability level.

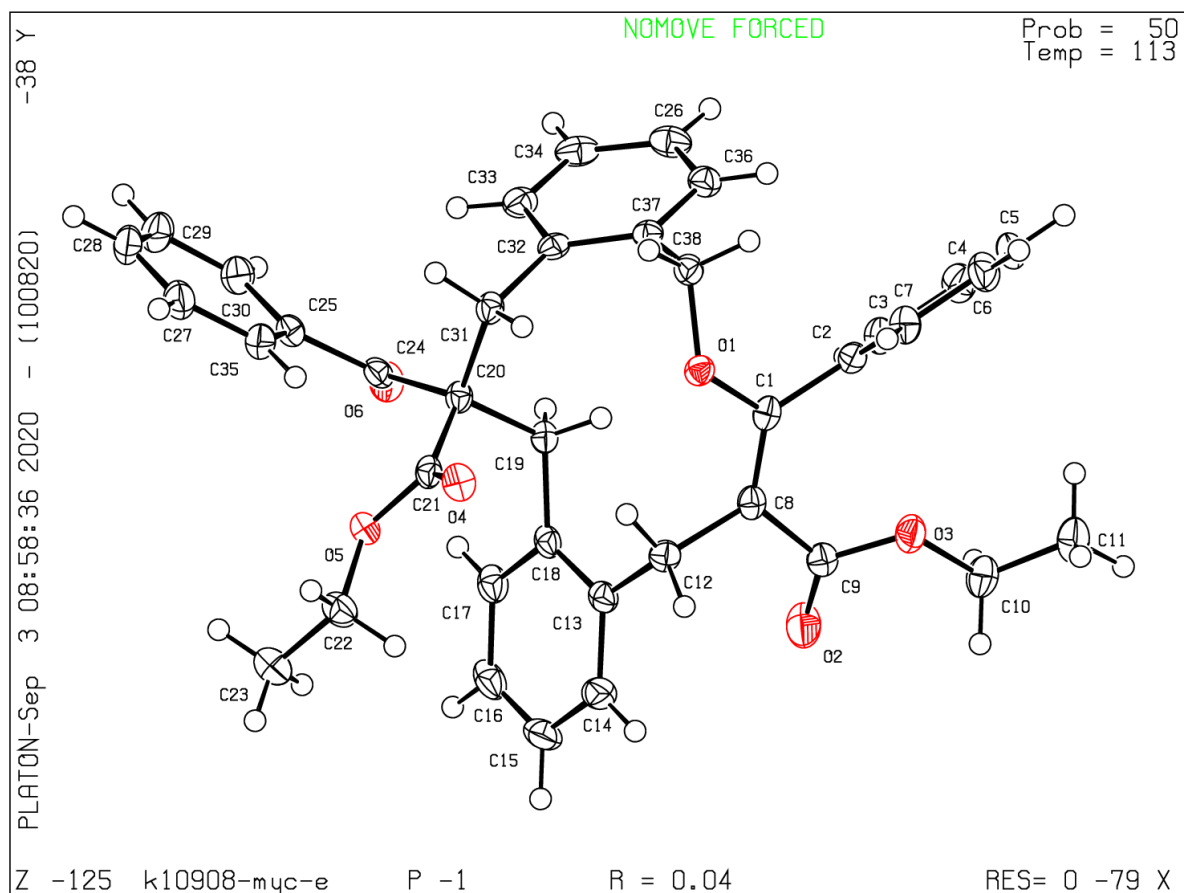

|                                   |                                                                                                                                                                                     |
|-----------------------------------|-------------------------------------------------------------------------------------------------------------------------------------------------------------------------------------|
| Empirical formula                 | C38 H36 O6                                                                                                                                                                          |
| Formula weight                    | 588.67                                                                                                                                                                              |
| Temperature                       | 113(2) K                                                                                                                                                                            |
| Wavelength                        | 0.71073 Å                                                                                                                                                                           |
| Crystal system                    | Triclinic                                                                                                                                                                           |
| Space group                       | P-1                                                                                                                                                                                 |
| Unit cell dimensions              | $\alpha = 9.1316(2) \text{ \AA}$ $a = 106.306(2)^\circ$ .<br>$\beta = 12.7947(3) \text{ \AA}$ $b = 107.568(2)^\circ$ .<br>$\gamma = 14.4860(4) \text{ \AA}$ $g = 98.437(2)^\circ$ . |
| Volume                            | 1498.27(7) Å <sup>3</sup>                                                                                                                                                           |
| Z                                 | 2                                                                                                                                                                                   |
| Density (calculated)              | 1.305 Mg/m <sup>3</sup>                                                                                                                                                             |
| Absorption coefficient            | 0.087 mm <sup>-1</sup>                                                                                                                                                              |
| F(000)                            | 624                                                                                                                                                                                 |
| Crystal size                      | 0.5 x 0.3 x 0.3 mm <sup>3</sup>                                                                                                                                                     |
| Theta range for data collection   | 2.360 to 27.050°.                                                                                                                                                                   |
| Index ranges                      | -11<=h<=11, -16<=k<=16, -18<=l<=18                                                                                                                                                  |
| Reflections collected             | 37071                                                                                                                                                                               |
| Independent reflections           | 6264 [R(int) = 0.0695]                                                                                                                                                              |
| Completeness to theta = 25.242°   | 99.7 %                                                                                                                                                                              |
| Absorption correction             | Semi-empirical from equivalents                                                                                                                                                     |
| Max. and min. transmission        | 1.00000 and 0.83308                                                                                                                                                                 |
| Refinement method                 | Full-matrix least-squares on F <sup>2</sup>                                                                                                                                         |
| Data / restraints / parameters    | 6264 / 0 / 399                                                                                                                                                                      |
| Goodness-of-fit on F <sup>2</sup> | 1.116                                                                                                                                                                               |
| Final R indices [I>2sigma(I)]     | R1 = 0.0413, wR2 = 0.1025                                                                                                                                                           |
| R indices (all data)              | R1 = 0.0542, wR2 = 0.1081                                                                                                                                                           |
| Extinction coefficient            | n/a                                                                                                                                                                                 |
| Largest diff. peak and hole       | 0.285 and -0.245 e.Å <sup>-3</sup>                                                                                                                                                  |

## X-ray crystal data of compound 13 (CCDC 2042106)

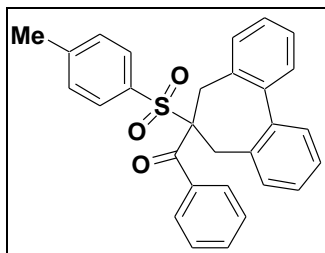

**Sample preparation** : A solution of compound **13** (30 mg) in  $\text{CH}_2\text{Cl}_2$  (10 mL) was placed in a tube (10 mL). EtOAc (2 mL) was added slowly to the vial with a dropper. The vial was closed with little cotton and kept at room temperature for 2 days. Then, colorless prisms were observed.

**Crystal measurement** : X-ray crystal structures were determined with a Bruker Enraf-Nonius single-crystal diffractometer (CAD4, Kappa CCD). Thermal ellipsoids are drawn at 50% probability level.

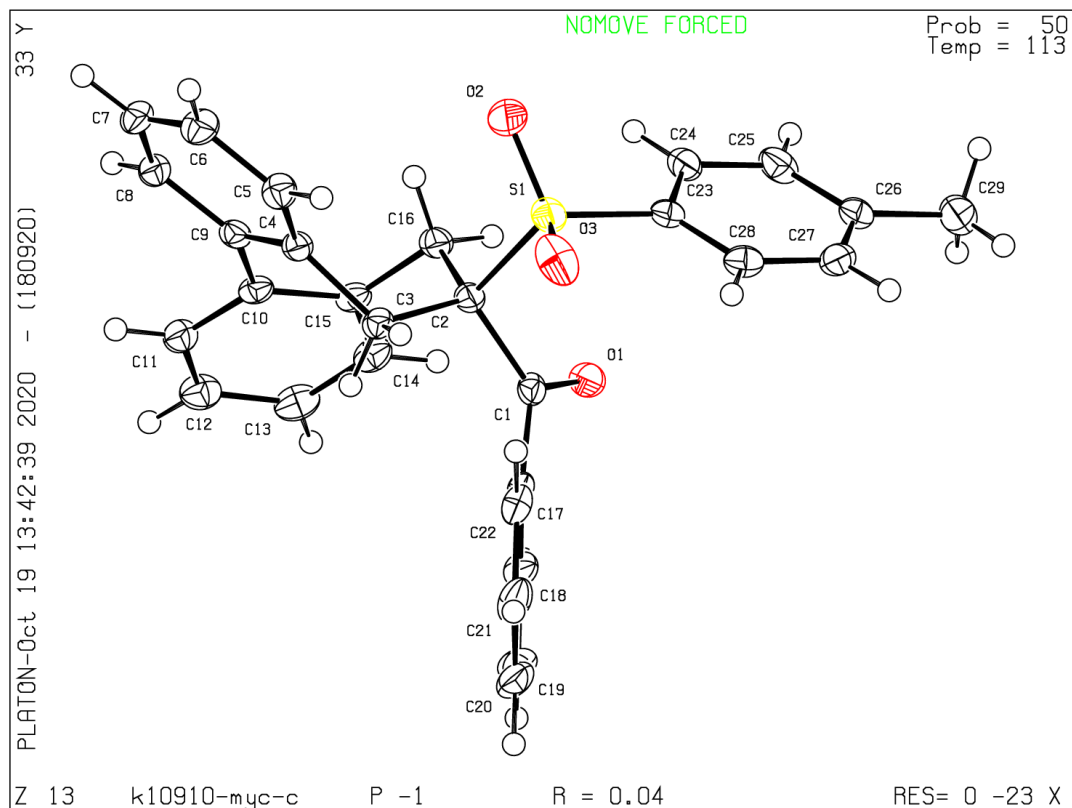



|                                             |                                                               |
|---------------------------------------------|---------------------------------------------------------------|
| Empirical formula                           | C <sub>29</sub> H <sub>24</sub> O <sub>3</sub> S              |
| Formula weight                              | 452.54                                                        |
| Temperature/K                               | 113(2)                                                        |
| Crystal system                              | triclinic                                                     |
| Space group                                 | P-1                                                           |
| a/Å                                         | 9.6718(3)                                                     |
| b/Å                                         | 10.5127(2)                                                    |
| c/Å                                         | 12.8470(3)                                                    |
| α/°                                         | 113.403(2)                                                    |
| β/°                                         | 103.061(2)                                                    |
| γ/°                                         | 99.138(2)                                                     |
| Volume/Å <sup>3</sup>                       | 1121.72(5)                                                    |
| Z                                           | 2                                                             |
| ρ <sub>calc</sub> /cm <sup>3</sup>          | 1.340                                                         |
| μ/mm <sup>-1</sup>                          | 0.174                                                         |
| F(000)                                      | 476.0                                                         |
| Crystal size/mm <sup>3</sup>                | 0.3 × 0.25 × 0.2                                              |
| Radiation                                   | Mo Kα (λ = 0.71073)                                           |
| 2Θ range for data collection/°              | 4.264 to 49.998                                               |
| Index ranges                                | -11 ≤ h ≤ 11, -12 ≤ k ≤ 12, -15 ≤ l ≤ 14                      |
| Reflections collected                       | 32987                                                         |
| Independent reflections                     | 3958 [R <sub>int</sub> = 0.0599, R <sub>sigma</sub> = 0.0295] |
| Data/restraints/parameters                  | 3958/0/299                                                    |
| Goodness-of-fit on F <sup>2</sup>           | 1.056                                                         |
| Final R indexes [I ≥ 2σ (I)]                | R <sub>1</sub> = 0.0359, wR <sub>2</sub> = 0.0941             |
| Final R indexes [all data]                  | R <sub>1</sub> = 0.0398, wR <sub>2</sub> = 0.0970             |
| Largest diff. peak/hole / e Å <sup>-3</sup> | 0.26/-0.46                                                    |

## X-ray crystal data of compound 14 (CCDC 2042107)

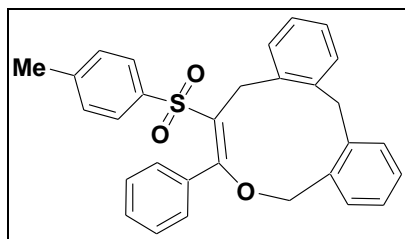

**Sample preparation** : A solution of compound **14** (30 mg) in CH<sub>2</sub>Cl<sub>2</sub> (10 mL) was placed in a tube (10 mL). EtOAc (2 mL) was added slowly to the vial with a dropper. The vial was closed with little cotton and kept at room temperature for 2 days. Then, colorless prisms were observed.

**Crystal measurement** : X-ray crystal structures were determined with a Bruker Enraf-Nonius single-crystal diffractometer (CAD4, Kappa CCD). Thermal ellipsoids are drawn at 50% probability level.

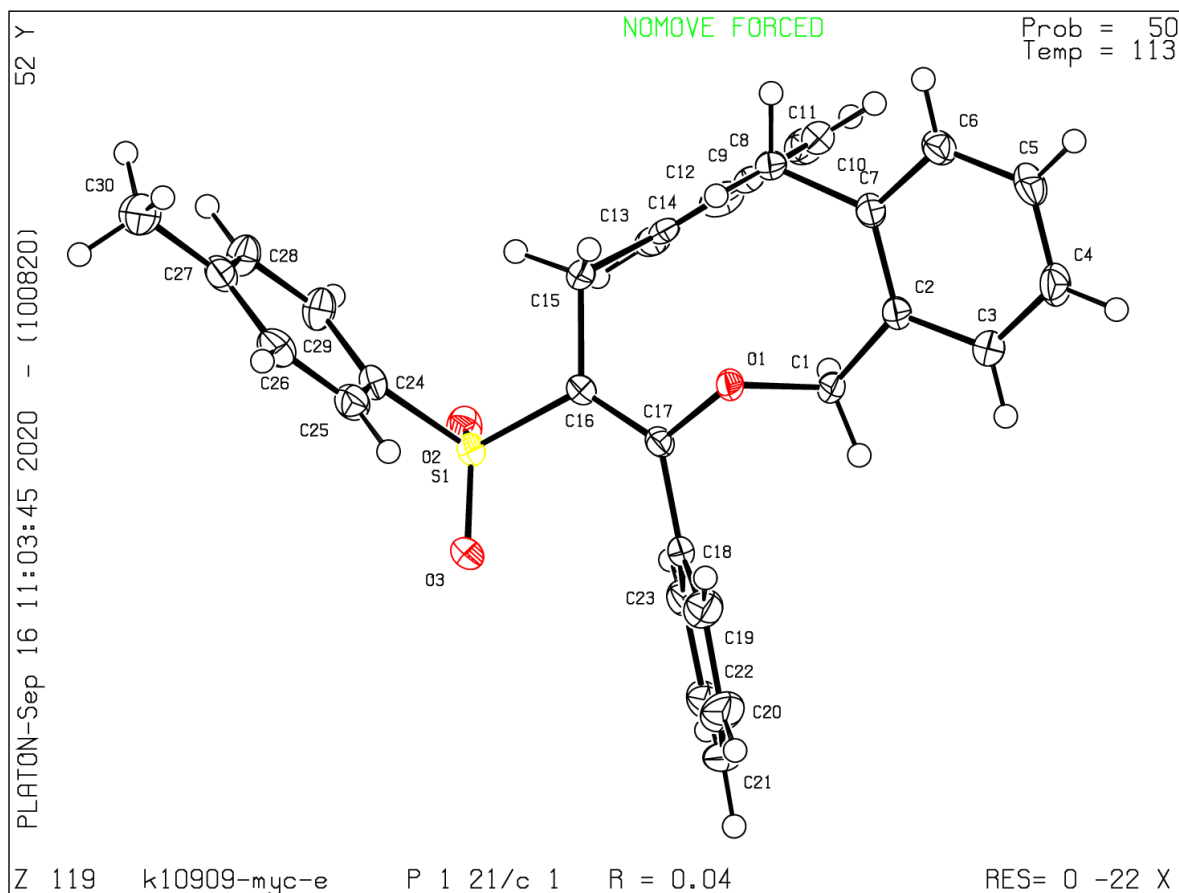

|                                             |                                                               |
|---------------------------------------------|---------------------------------------------------------------|
| Empirical formula                           | C <sub>30</sub> H <sub>26</sub> O <sub>3</sub> S              |
| Formula weight                              | 466.57                                                        |
| Temperature/K                               | 113(2)                                                        |
| Crystal system                              | monoclinic                                                    |
| Space group                                 | P2 <sub>1</sub> /c                                            |
| a/Å                                         | 9.7564(2)                                                     |
| b/Å                                         | 14.7638(2)                                                    |
| c/Å                                         | 17.1919(3)                                                    |
| α/°                                         | 90                                                            |
| β/°                                         | 101.0780(10)                                                  |
| γ/°                                         | 90                                                            |
| Volume/Å <sup>3</sup>                       | 2430.20(7)                                                    |
| Z                                           | 4                                                             |
| ρ <sub>calc</sub> /cm <sup>3</sup>          | 1.275                                                         |
| μ/mm <sup>-1</sup>                          | 0.163                                                         |
| F(000)                                      | 984.0                                                         |
| Crystal size/mm <sup>3</sup>                | 0.5 × 0.35 × 0.3                                              |
| Radiation                                   | Mo Kα (λ = 0.71073)                                           |
| 2θ range for data collection/°              | 4.254 to 54.13                                                |
| Index ranges                                | -12 ≤ h ≤ 12, -17 ≤ k ≤ 18, -21 ≤ l ≤ 19                      |
| Reflections collected                       | 52824                                                         |
| Independent reflections                     | 5196 [R <sub>int</sub> = 0.0624, R <sub>sigma</sub> = 0.0289] |
| Data/restraints/parameters                  | 5196/0/308                                                    |
| Goodness-of-fit on F <sup>2</sup>           | 1.077                                                         |
| Final R indexes [I ≥ 2σ (I)]                | R <sub>1</sub> = 0.0357, wR <sub>2</sub> = 0.0919             |
| Final R indexes [all data]                  | R <sub>1</sub> = 0.0415, wR <sub>2</sub> = 0.0952             |
| Largest diff. peak/hole / e Å <sup>-3</sup> | 0.33/-0.44                                                    |

## X-ray crystal data of compound 15 (CCDC 2042108)

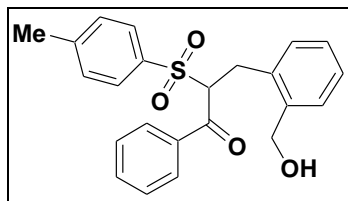

**Sample preparation** : A solution of compound **15** (30 mg) in CH<sub>2</sub>Cl<sub>2</sub> (10 mL) was placed in a tube (10 mL). EtOAc (2 mL) was added slowly to the vial with a dropper. The vial was closed with little cotton and kept at room temperature for 2 days. Then, colorless prisms were observed.

**Crystal measurement** : X-ray crystal structures were determined with a Bruker Enraf-Nonius single-crystal diffractometer (CAD4, Kappa CCD). Thermal ellipsoids are drawn at 50% probability level.

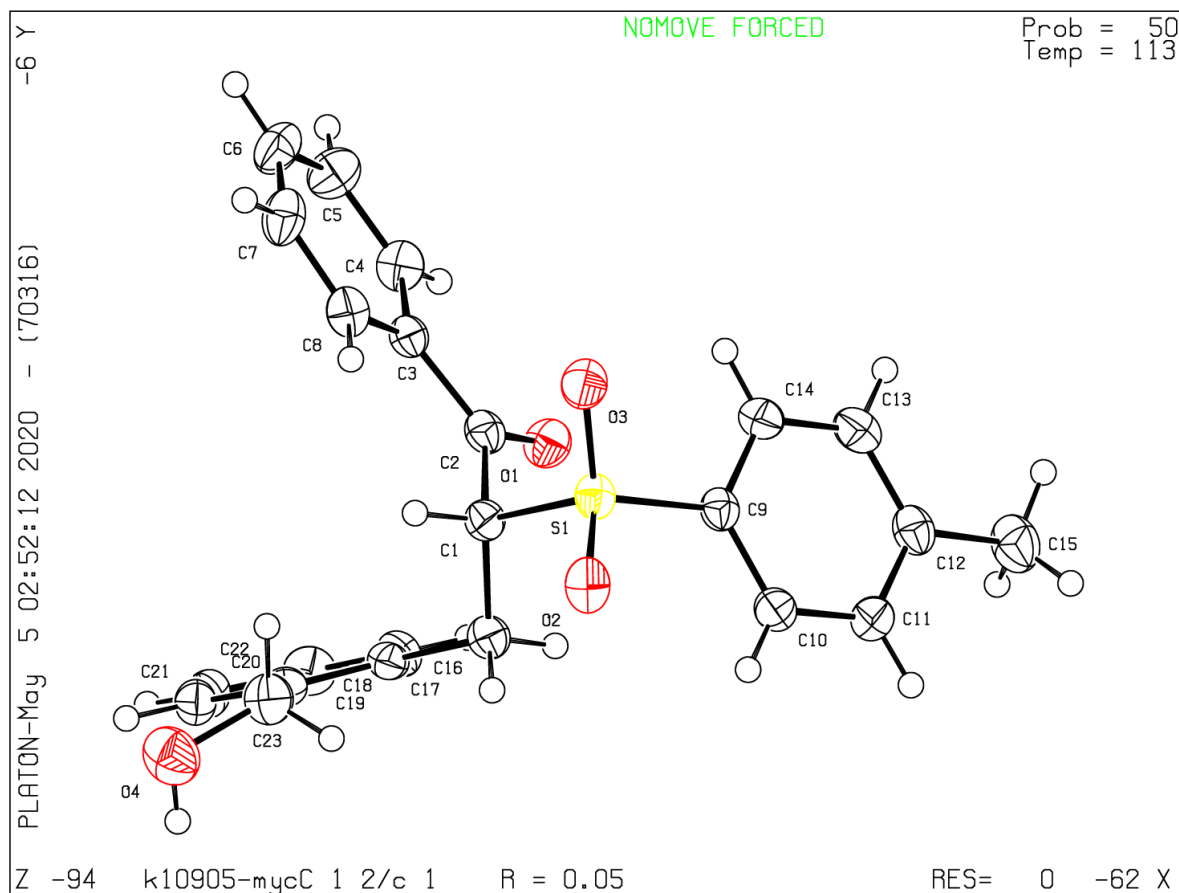

|                                             |                                                               |
|---------------------------------------------|---------------------------------------------------------------|
| Empirical formula                           | C <sub>23</sub> H <sub>22</sub> O <sub>4</sub> S              |
| Formula weight                              | 394.46                                                        |
| Temperature/K                               | 113(2)                                                        |
| Crystal system                              | monoclinic                                                    |
| Space group                                 | C2/c                                                          |
| a/Å                                         | 16.1182(3)                                                    |
| b/Å                                         | 11.9825(2)                                                    |
| c/Å                                         | 20.4080(4)                                                    |
| α/°                                         | 90                                                            |
| β/°                                         | 105.952(2)                                                    |
| γ/°                                         | 90                                                            |
| Volume/Å <sup>3</sup>                       | 3789.75(13)                                                   |
| Z                                           | 8                                                             |
| ρ <sub>calc</sub> /cm <sup>3</sup>          | 1.383                                                         |
| μ/mm <sup>-1</sup>                          | 0.198                                                         |
| F(000)                                      | 1664.0                                                        |
| Crystal size/mm <sup>3</sup>                | 0.2 × 0.15 × 0.15                                             |
| Radiation                                   | Mo Kα (λ = 0.71073)                                           |
| 2θ range for data collection/°              | 4.152 to 54.114                                               |
| Index ranges                                | -20 ≤ h ≤ 20, -15 ≤ k ≤ 15, -25 ≤ l ≤ 25                      |
| Reflections collected                       | 21960                                                         |
| Independent reflections                     | 3978 [R <sub>int</sub> = 0.0246, R <sub>sigma</sub> = 0.0188] |
| Data/restraints/parameters                  | 3978/0/255                                                    |
| Goodness-of-fit on F <sup>2</sup>           | 1.103                                                         |
| Final R indexes [I ≥ 2σ (I)]                | R <sub>1</sub> = 0.0456, wR <sub>2</sub> = 0.1285             |
| Final R indexes [all data]                  | R <sub>1</sub> = 0.0502, wR <sub>2</sub> = 0.1315             |
| Largest diff. peak/hole / e Å <sup>-3</sup> | 0.50/-0.43                                                    |
